# Supplementary material for: Transcriptome Analysis Reveals the Molecular Basis of Overfeeding-Induced Diabetes in Zebrafish
Source: Int J Mol Sci. 2023 Jul 26;24(15):11994. doi: 10.3390/ijms241511994 (PMC10418320; doi:10.3390/ijms241511994)
Supplement: Supplementary file 1 [file ijms-24-11994-s001.zip]

Archive with 6 entries (6 files):
- SUPPLEMENTAL FIGURES AND LEGENDS.pdf
- Supplementary Table S1_The information of Differentially expressed genes.xlsx
- Supplementary Table S2_KEGG enrichment analysis results of DEGs.xlsx
- Supplementary Table S3_Jaccard similarity coefficient of KEGG signaling pathways.xlsx
- Supplementary Table S4_GO enrichment analysis results of DEGs.xlsx
- Supplementary Table S5_ The genes of insulin receptors and insulin receptor subunits.xlsx
