# Supplementary material for: Transcriptome Analysis Reveals the Molecular Basis of Overfeeding-Induced Diabetes in Zebrafish
Source: Int J Mol Sci. 2023 Jul 26;24(15):11994. doi: 10.3390/ijms241511994 (PMC10418320; doi:10.3390/ijms241511994)
Supplement: Supplementary file 1 [file ijms-24-11994-s001.zip › Supplementary Table S1_The information of Differentially expressed genes.xlsx]

## Sheet: Up-regulated genes
Up-regulated DEGs in liver after overfeeding
ENSEMBL Gene ID	Gene name	baseMean	log2FoldChange	lfcSE	stat	pvalue	padj	Gene description
ENSDARG00000061240	cbln4	86.3476	5.86293	0.519796	11.2793	1.66074e-29	4.23345e-26	cerebellin 4 precursor [Source:ZFIN;Acc:ZDB-GENE-080204-58]
ENSDARG00000014565	eif4e1b	13.5317	26.9038	3.09462	8.69375	3.50669e-18	3.63585e-15	eukaryotic translation initiation factor 4E family member 1B [Source:NCBI gene;Acc:30738]
ENSDARG00000103383	dnah9	23.9958	18.8892	2.17321	8.69185	3.56578e-18	3.63585e-15	dynein, axonemal, heavy chain 9 [Source:ZFIN;Acc:ZDB-GENE-020925-1]
ENSDARG00000013741	lancl1	721.055	2.03681	0.241707	8.42677	3.55347e-17	3.29391e-14	LanC antibiotic synthetase component C-like 1 (bacterial) [Source:NCBI gene;Acc:494154]
ENSDARG00000097824	smco4	225.697	1.62275	0.195707	8.29172	1.11621e-16	9.21944e-14	single-pass membrane protein with coiled-coil domains 4 [Source:ZFIN;Acc:ZDB-GENE-131121-542]
ENSDARG00000024478	mpc2	1136.64	2.44295	0.302436	8.07757	6.60702e-16	4.81203e-13	mitochondrial pyruvate carrier 2 [Source:ZFIN;Acc:ZDB-GENE-030131-330]
ENSDARG00000075735	cxxc5b	195.133	1.43867	0.1795	8.01492	1.10211e-15	7.75012e-13	CXXC finger protein 5b [Source:ZFIN;Acc:ZDB-GENE-130225-1]
ENSDARG00000089924	aldh2.1	1700.73	1.91185	0.247654	7.71986	1.16459e-14	6.78556e-12	aldehyde dehydrogenase 2 family member, tandem duplicate 1 [Source:ZFIN;Acc:ZDB-GENE-040426-1262]
ENSDARG00000017780	rorcb	623.538	2.79153	0.361983	7.71176	1.24094e-14	7.02956e-12	RAR-related orphan receptor C b [Source:ZFIN;Acc:ZDB-GENE-040724-215]
ENSDARG00000015201	pcmt	783.437	1.1957	0.160193	7.46415	8.384e-14	4.07083e-11	protein-L-isoaspartate (D-aspartate) O-methyltransferase [Source:NCBI gene;Acc:30751]
ENSDARG00000016904	bckdk	1125.98	0.828659	0.112876	7.34134	2.11458e-13	9.8006e-11	branched chain ketoacid dehydrogenase kinase [Source:ZFIN;Acc:ZDB-GENE-021204-1]
ENSDARG00000003869	decr1	657.173	2.8293	0.391827	7.2208	5.16819e-13	2.29119e-10	2,4-dienoyl CoA reductase 1, mitochondrial [Source:ZFIN;Acc:ZDB-GENE-040718-142]
ENSDARG00000075393	spock2	1254.17	4.11008	0.576164	7.13353	9.78239e-13	4.15609e-10	SPARC (osteonectin), cwcv and kazal like domains proteoglycan 2 [Source:ZFIN;Acc:ZDB-GENE-090312-170]
ENSDARG00000042900	gtpbp1l	310.999	1.36436	0.191736	7.11582	1.11246e-12	4.62989e-10	GTP binding protein 1, like [Source:ZFIN;Acc:ZDB-GENE-041007-2]
ENSDARG00000087277	selenoj	630.922	1.32818	0.187631	7.0787	1.45511e-12	5.71589e-10	selenoprotein J [Source:ZFIN;Acc:ZDB-GENE-030131-4163]
ENSDARG00000028048	rdh8a	209.963	2.04013	0.288216	7.07848	1.45749e-12	5.71589e-10	retinol dehydrogenase 8a [Source:ZFIN;Acc:ZDB-GENE-021115-3]
ENSDARG00000054537	nhsl1a	171.949	1.90134	0.277767	6.84509	7.64302e-12	2.88637e-09	NHS-like 1a [Source:ZFIN;Acc:ZDB-GENE-050411-25]
ENSDARG00000099164	nacc1a	361.032	1.27167	0.186414	6.82175	8.9938e-12	3.33474e-09	nucleus accumbens associated 1, BEN and BTB (POZ) domain containing a [Source:ZFIN;Acc:ZDB-GENE-010319-3]
ENSDARG00000006487	anp32a	1957.36	0.821175	0.12175	6.74476	1.53282e-11	5.48399e-09	acidic (leucine-rich) nuclear phosphoprotein 32 family, member A [Source:NCBI gene;Acc:335907]
ENSDARG00000053966	cyp17a2	21.639	16.6631	2.52914	6.58845	4.4444e-11	1.48581e-08	cytochrome P450, family 17, subfamily A, polypeptide 2 [Source:ZFIN;Acc:ZDB-GENE-100822-1]
ENSDARG00000100904	CABZ01109021.1	927.182	1.82686	0.278552	6.55842	5.43791e-11	1.76024e-08	0
ENSDARG00000071555	zgc:153675	214.707	2.01739	0.312942	6.44654	1.1443e-10	3.33366e-08	zgc:153675 [Source:ZFIN;Acc:ZDB-GENE-061013-567]
ENSDARG00000036820	mgll	1403.41	1.76728	0.275549	6.41367	1.42055e-10	3.9132e-08	monoglyceride lipase [Source:ZFIN;Acc:ZDB-GENE-031006-9]
ENSDARG00000103915	ero1b	2297.71	1.19848	0.186909	6.41211	1.43523e-10	3.9132e-08	endoplasmic reticulum oxidoreductase beta [Source:ZFIN;Acc:ZDB-GENE-060929-744]
ENSDARG00000019815	fn1a	399.39	1.92156	0.299697	6.41169	1.43917e-10	3.9132e-08	fibronectin 1a [Source:ZFIN;Acc:ZDB-GENE-000426-1]
ENSDARG00000017126	ilvbl	1082.92	0.932999	0.152352	6.12398	9.12648e-10	2.07091e-07	ilvB (bacterial acetolactate synthase)-like [Source:NCBI gene;Acc:393639]
ENSDARG00000079049	cercam	71.9637	2.11758	0.345797	6.12376	9.13949e-10	2.07091e-07	cerebral endothelial cell adhesion molecule [Source:ZFIN;Acc:ZDB-GENE-030131-9787]
ENSDARG00000031720	clstn1	6034.63	1.09927	0.18041	6.09317	1.10698e-09	2.42738e-07	calsyntenin 1 [Source:ZFIN;Acc:ZDB-GENE-040426-1064]
ENSDARG00000060415	arhgef28a	227.866	1.26234	0.2082	6.06311	1.33516e-09	2.807e-07	Rho guanine nucleotide exchange factor (GEF) 28a [Source:ZFIN;Acc:ZDB-GENE-060531-28]
ENSDARG00000070625	enpp5	370.746	2.00796	0.335091	5.99227	2.06927e-09	4.16161e-07	ectonucleotide pyrophosphatase/phosphodiesterase 5 [Source:ZFIN;Acc:ZDB-GENE-041014-10]
ENSDARG00000008153	serinc5	440.241	1.81082	0.303284	5.97069	2.36249e-09	4.63252e-07	serine incorporator 5 [Source:NCBI gene;Acc:406835]
ENSDARG00000088357	acadl	2319.63	1.27354	0.215883	5.89922	3.65233e-09	6.67538e-07	acyl-CoA dehydrogenase long chain [Source:ZFIN;Acc:ZDB-GENE-040426-771]
ENSDARG00000017439	eif4ba	605.361	0.974736	0.165249	5.89859	3.66617e-09	6.67538e-07	eukaryotic translation initiation factor 4Ba [Source:ZFIN;Acc:ZDB-GENE-060629-1]
ENSDARG00000043446	efhd1	1071.09	3.43009	0.583373	5.87975	4.10895e-09	7.3059e-07	EF-hand domain family, member D1 [Source:ZFIN;Acc:ZDB-GENE-030131-7461]
ENSDARG00000073688	nav2a	616.416	1.27783	0.217429	5.87698	4.17823e-09	7.3059e-07	neuron navigator 2a [Source:ZFIN;Acc:ZDB-GENE-120502-3]
ENSDARG00000056510	gstk1	1081.97	1.63026	0.277422	5.87645	4.19159e-09	7.3059e-07	glutathione S-transferase kappa 1 [Source:ZFIN;Acc:ZDB-GENE-040718-298]
ENSDARG00000030765	hadh	1421.71	1.24795	0.213724	5.83906	5.24962e-09	8.77504e-07	hydroxyacyl-CoA dehydrogenase [Source:ZFIN;Acc:ZDB-GENE-040801-261]
ENSDARG00000097011	hbaa1	6038.53	2.78655	0.485798	5.73604	9.69162e-09	1.49728e-06	hemoglobin, alpha adult 1 [Source:NCBI gene;Acc:30507]
ENSDARG00000054172	pgrmc1	2852.8	1.40372	0.245241	5.72383	1.04149e-08	1.57443e-06	progesterone receptor membrane component 1 [Source:ZFIN;Acc:ZDB-GENE-041114-91]
ENSDARG00000027009	zgc:85777	2199.49	1.45258	0.253784	5.7237	1.04226e-08	1.57443e-06	zgc:85777 [Source:ZFIN;Acc:ZDB-GENE-040426-2210]
ENSDARG00000103320	lclat1	982.775	1.04125	0.182192	5.71513	1.09623e-08	1.63178e-06	lysocardiolipin acyltransferase 1 [Source:NCBI gene;Acc:406554]
ENSDARG00000070735	rnd2	277.006	2.30916	0.40749	5.66679	1.45495e-08	2.06047e-06	Rho family GTPase 2 [Source:ZFIN;Acc:ZDB-GENE-030616-177]
ENSDARG00000102690	rims2b	283.782	1.6795	0.299326	5.61092	2.01252e-08	2.71797e-06	regulating synaptic membrane exocytosis 2b [Source:ZFIN;Acc:ZDB-GENE-060503-893]
ENSDARG00000101766	ptmab	5633.26	0.859958	0.153449	5.60419	2.09228e-08	2.80709e-06	prothymosin alpha b [Source:NCBI gene;Acc:559194]
ENSDARG00000054804	anp32e	1866.02	0.863264	0.154486	5.58796	2.29753e-08	3.05242e-06	acidic (leucine-rich) nuclear phosphoprotein 32 family, member E [Source:NCBI gene;Acc:406562]
ENSDARG00000008287	fam114a1	563.346	1.02251	0.183502	5.5722	2.51549e-08	3.26742e-06	family with sequence similarity 114 member A1 [Source:ZFIN;Acc:ZDB-GENE-070410-52]
ENSDARG00000077934	tegt	5538.65	0.728489	0.131843	5.52543	3.28679e-08	4.1375e-06	testis enhanced gene transcript (BAX inhibitor 1) [Source:ZFIN;Acc:ZDB-GENE-030826-10]
ENSDARG00000056929	kdm6bb	364.671	1.49787	0.271577	5.51546	3.47871e-08	4.32569e-06	lysine (K)-specific demethylase 6B, b [Source:ZFIN;Acc:ZDB-GENE-040724-166]
ENSDARG00000043079	MMP23B	137.298	1.61238	0.295193	5.46213	4.70465e-08	5.61064e-06	matrix metallopeptidase 23ba [Source:NCBI gene;Acc:101882601]
ENSDARG00000100825	calm3a	1731.19	0.895347	0.165322	5.41578	6.10226e-08	6.96416e-06	calmodulin 3a (phosphorylase kinase, delta) [Source:ZFIN;Acc:ZDB-GENE-030131-5590]
ENSDARG00000077504	si:ch211-103n10.5	157.908	3.54151	0.653962	5.41547	6.11281e-08	6.96416e-06	si:ch211-103n10.5 [Source:ZFIN;Acc:ZDB-GENE-030131-5155]
ENSDARG00000098059	fkbp3	529.585	0.689361	0.127656	5.40016	6.65824e-08	7.54341e-06	FKBP prolyl isomerase 3 [Source:ZFIN;Acc:ZDB-GENE-030616-419]
ENSDARG00000014825	si:dkeyp-69b9.6	528.399	0.822732	0.152571	5.39244	6.95087e-08	7.78841e-06	si:dkeyp-69b9.6 [Source:ZFIN;Acc:ZDB-GENE-100922-227]
ENSDARG00000035909	mfsd2ab	2661.1	2.15748	0.401224	5.37723	7.56397e-08	8.33794e-06	major facilitator superfamily domain containing 2ab [Source:NCBI gene;Acc:445176]
ENSDARG00000104702	cat	13762.4	1.4547	0.271827	5.35154	8.72069e-08	9.40958e-06	catalase [Source:NCBI gene;Acc:30068]
ENSDARG00000093760	si:ch211-197h24.9	297.719	2.20293	0.413479	5.32778	9.94214e-08	1.03974e-05	si:ch211-197h24.9 [Source:ZFIN;Acc:ZDB-GENE-031116-15]
ENSDARG00000099698	BX548059.1	50.04	3.56101	0.670509	5.31091	1.09081e-07	1.13494e-05	0
ENSDARG00000091131	cry3b	1152.51	1.40976	0.265542	5.30898	1.1024e-07	1.14118e-05	cryptochrome circadian regulator 3b [Source:ZFIN;Acc:ZDB-GENE-010426-5]
ENSDARG00000042548	tpd52l1	237.776	1.27038	0.240752	5.27671	1.31524e-07	1.32127e-05	tpd52 like 1 [Source:ZFIN;Acc:ZDB-GENE-050522-121]
ENSDARG00000021973	st13	1373.63	1.05691	0.201034	5.25736	1.46136e-07	1.42591e-05	ST13 Hsp70 interacting protein [Source:ZFIN;Acc:ZDB-GENE-030131-5395]
ENSDARG00000036965	rnf24	150.293	3.27817	0.623738	5.25569	1.47471e-07	1.43024e-05	ring finger protein 24 [Source:ZFIN;Acc:ZDB-GENE-041114-40]
ENSDARG00000019033	tmem59	1496.63	0.77944	0.148693	5.24194	1.58896e-07	1.51419e-05	transmembrane protein 59 [Source:ZFIN;Acc:ZDB-GENE-070912-397]
ENSDARG00000062302	znf652	170.944	1.95795	0.37366	5.23992	1.60649e-07	1.52378e-05	zinc finger protein 652 [Source:ZFIN;Acc:ZDB-GENE-030131-5857]
ENSDARG00000031020	pip4k2ca	726.785	0.660639	0.126279	5.23157	1.68076e-07	1.57953e-05	phosphatidylinositol-5-phosphate 4-kinase, type II, gamma a [Source:NCBI gene;Acc:373124]
ENSDARG00000032849	ndrg1a	3329.95	1.26525	0.242078	5.22663	1.7263e-07	1.60751e-05	N-myc downstream regulated 1a [Source:ZFIN;Acc:ZDB-GENE-030826-34]
ENSDARG00000030608	rhogd	350.132	1.01574	0.194724	5.21629	1.82547e-07	1.69213e-05	ras homolog gene family, member Gd [Source:ZFIN;Acc:ZDB-GENE-040426-1504]
ENSDARG00000056639	carmil2	814.18	1.43415	0.275198	5.21136	1.87465e-07	1.72985e-05	capping protein regulator and myosin 1 linker 2 [Source:ZFIN;Acc:ZDB-GENE-050419-197]
ENSDARG00000055969	rfc3	107.981	1.50649	0.291021	5.17657	2.26006e-07	2.03037e-05	replication factor C (activator 1) 3 [Source:ZFIN;Acc:ZDB-GENE-020809-3]
ENSDARG00000071881	arl9	201.233	0.921965	0.178699	5.15933	2.4784e-07	2.17854e-05	ADP-ribosylation factor-like 9 [Source:ZFIN;Acc:ZDB-GENE-060825-210]
ENSDARG00000071454	crp1	378.432	3.35035	0.650155	5.15316	2.56138e-07	2.24181e-05	C-reactive protein 1 [Source:ZFIN;Acc:ZDB-GENE-060503-314]
ENSDARG00000101348	plppr5b	26.3075	7.19487	1.4033	5.1271	2.94246e-07	2.50023e-05	phospholipid phosphatase related 5b [Source:ZFIN;Acc:ZDB-GENE-070620-15]
ENSDARG00000053405	sord	1131.86	1.51706	0.295992	5.12534	2.97001e-07	2.50278e-05	sorbitol dehydrogenase [Source:ZFIN;Acc:ZDB-GENE-040426-1231]
ENSDARG00000038585	eif4e2	194.883	1.65506	0.323364	5.11824	3.08399e-07	2.58814e-05	eukaryotic translation initiation factor 4E family member 2 [Source:ZFIN;Acc:ZDB-GENE-050327-59]
ENSDARG00000046133	b3galnt2	92.1099	1.92922	0.377298	5.11325	3.16661e-07	2.64658e-05	beta-1,3-N-acetylgalactosaminyltransferase 2 [Source:NCBI gene;Acc:553716]
ENSDARG00000053215	me1	908.882	1.63534	0.32054	5.10182	3.36399e-07	2.80007e-05	malic enzyme 1, NADP(+)-dependent, cytosolic [Source:ZFIN;Acc:ZDB-GENE-061013-438]
ENSDARG00000017422	apmap	2703.31	0.876538	0.17187	5.10002	3.39618e-07	2.80463e-05	adipocyte plasma membrane associated protein [Source:NCBI gene;Acc:266637]
ENSDARG00000038996	egln1a	40.2654	1.60875	0.315647	5.09668	3.45669e-07	2.83102e-05	egl-9 family hypoxia-inducible factor 1a [Source:ZFIN;Acc:ZDB-GENE-110408-34]
ENSDARG00000099757	wdr47b	212.261	2.63398	0.517804	5.08683	3.64088e-07	2.93473e-05	WD repeat domain 47b [Source:ZFIN;Acc:ZDB-GENE-121114-10]
ENSDARG00000077967	si:ch211-140m22.7	316.978	1.52859	0.301087	5.07691	3.83621e-07	3.06791e-05	si:ch211-140m22.7 [Source:ZFIN;Acc:ZDB-GENE-070912-73]
ENSDARG00000061691	qpctla	466.771	0.793472	0.156579	5.06754	4.02985e-07	3.17829e-05	glutaminyl-peptide cyclotransferase-like a [Source:ZFIN;Acc:ZDB-GENE-030131-1441]
ENSDARG00000019503	zgc:103759	83.4003	1.52805	0.302756	5.04714	4.4847e-07	3.47743e-05	zgc:103759 [Source:ZFIN;Acc:ZDB-GENE-041010-100]
ENSDARG00000103740	fundc2	678.572	1.04889	0.208298	5.03555	4.76487e-07	3.59889e-05	fun14 domain containing 2 [Source:ZFIN;Acc:ZDB-GENE-041010-26]
ENSDARG00000059388	bdh1	328.034	1.09027	0.216626	5.03298	4.82925e-07	3.63405e-05	3-hydroxybutyrate dehydrogenase, type 1 [Source:ZFIN;Acc:ZDB-GENE-070410-130]
ENSDARG00000092181	im:7140055	166.843	1.11748	0.222066	5.03219	4.84914e-07	3.6356e-05	im:7140055 [Source:ZFIN;Acc:ZDB-GENE-041111-101]
ENSDARG00000011222	ccdc28b	47.2844	3.74386	0.744644	5.02771	4.96362e-07	3.7078e-05	coiled-coil domain containing 28B [Source:ZFIN;Acc:ZDB-GENE-060208-3]
ENSDARG00000105547	CR388231.5	16.2422	2.46094	0.491685	5.00511	5.583e-07	4.12515e-05	0
ENSDARG00000063682	fhod3a	122.887	3.92746	0.785331	5.00102	5.70283e-07	4.19848e-05	formin homology 2 domain containing 3a [Source:ZFIN;Acc:ZDB-GENE-060503-633]
ENSDARG00000054771	ghra	90.2309	1.40665	0.281661	4.99413	5.91022e-07	4.30454e-05	growth hormone receptor a [Source:ZFIN;Acc:ZDB-GENE-070509-1]
ENSDARG00000036549	agpat3	2094.17	1.13167	0.226725	4.99135	5.996e-07	4.33604e-05	1-acylglycerol-3-phosphate O-acyltransferase 3 [Source:ZFIN;Acc:ZDB-GENE-040426-2765]
ENSDARG00000011166	cahz	672.572	2.67402	0.53586	4.99015	6.03328e-07	4.34759e-05	carbonic anhydrase [Source:NCBI gene;Acc:30331]
ENSDARG00000024619	foxo6b	121.807	3.17159	0.637828	4.97249	6.60999e-07	4.69678e-05	forkhead box O6 b [Source:ZFIN;Acc:ZDB-GENE-060503-776]
ENSDARG00000105255	zbtb4	2618.14	1.39885	0.281382	4.97138	6.64787e-07	4.70729e-05	zinc finger and BTB domain containing 4 [Source:ZFIN;Acc:ZDB-GENE-100318-5]
ENSDARG00000068149	tprg1l	89.3665	2.20881	0.444967	4.964	6.90551e-07	4.856e-05	tumor protein p63 regulated 1-like [Source:ZFIN;Acc:ZDB-GENE-070531-2]
ENSDARG00000040401	slc25a20	1847.87	1.12874	0.227676	4.95765	7.13507e-07	5.00019e-05	solute carrier family 25 member 20 [Source:ZFIN;Acc:ZDB-GENE-040426-1869]
ENSDARG00000098075	sh3bgrl3	1926.83	0.913108	0.184969	4.93655	7.95151e-07	5.44145e-05	SH3 domain binding glutamate-rich protein like 3 [Source:ZFIN;Acc:ZDB-GENE-040426-1059]
ENSDARG00000102055	hadhb	2948.1	1.05992	0.214992	4.93005	8.22069e-07	5.60684e-05	hydroxyacyl-CoA dehydrogenase trifunctional multienzyme complex subunit beta [Source:ZFIN;Acc:ZDB-GENE-030131-8550]
ENSDARG00000067591	puraa	308.854	1.176	0.238773	4.92519	8.428e-07	5.72907e-05	purine-rich element binding protein Aa [Source:ZFIN;Acc:ZDB-GENE-040624-8]
ENSDARG00000092354	si:ch211-284e13.6	216.049	2.10809	0.42855	4.91912	8.69342e-07	5.85501e-05	si:ch211-284e13.6 [Source:ZFIN;Acc:ZDB-GENE-060526-163]
ENSDARG00000074676	rprd2b	225.839	1.16191	0.236742	4.90792	9.20453e-07	6.15436e-05	regulation of nuclear pre-mRNA domain containing 2b [Source:ZFIN;Acc:ZDB-GENE-110719-1]
ENSDARG00000053279	apln	659.602	1.67603	0.341932	4.90165	9.50342e-07	6.27195e-05	apelin [Source:NCBI gene;Acc:798375]
ENSDARG00000038693	gng7	296.565	1.1655	0.238109	4.89484	9.83848e-07	6.43064e-05	guanine nucleotide binding protein (G protein), gamma 7 [Source:ZFIN;Acc:ZDB-GENE-040718-93]
ENSDARG00000018146	gpx1a	3682.9	1.42955	0.29257	4.88618	1.02813e-06	6.67728e-05	glutathione peroxidase 1a [Source:ZFIN;Acc:ZDB-GENE-030410-1]
ENSDARG00000054400	si:ch211-198n5.11	183.679	1.32328	0.271716	4.87006	1.11562e-06	7.19961e-05	si:ch211-198n5.11 [Source:ZFIN;Acc:ZDB-GENE-050411-52]
ENSDARG00000052702	capn1a	332.726	1.04504	0.214613	4.86942	1.11928e-06	7.20044e-05	calpain 1, (mu/I) large subunit a [Source:ZFIN;Acc:ZDB-GENE-040426-1263]
ENSDARG00000100166	si:dkeyp-9d4.3	518.365	2.11322	0.434061	4.86849	1.12454e-06	7.21154e-05	si:dkeyp-9d4.3 [Source:ZFIN;Acc:ZDB-GENE-110914-175]
ENSDARG00000030781	acads	676.806	1.47097	0.30413	4.83667	1.32033e-06	8.34895e-05	acyl-CoA dehydrogenase short chain [Source:ZFIN;Acc:ZDB-GENE-040808-64]
ENSDARG00000113045	CABZ01063543.1	127.182	6.31029	1.30636	4.83045	1.36223e-06	8.554e-05	solute carrier family 12 member 2-like [Source:NCBI gene;Acc:100537771]
ENSDARG00000075459	ptpn20	50.6062	1.96486	0.406798	4.83008	1.36479e-06	8.554e-05	protein tyrosine phosphatase non-receptor type 20 [Source:ZFIN;Acc:ZDB-GENE-090313-90]
ENSDARG00000043010	camk2d1	566.14	1.23241	0.256414	4.80632	1.5373e-06	9.41449e-05	calcium/calmodulin-dependent protein kinase (CaM kinase) II delta 1 [Source:NCBI gene;Acc:445208]
ENSDARG00000045411	acad11	1244.92	1.71759	0.358072	4.79677	1.61248e-06	9.69891e-05	acyl-CoA dehydrogenase family, member 11 [Source:ZFIN;Acc:ZDB-GENE-040426-814]
ENSDARG00000016404	ptch1	160.189	1.73635	0.362876	4.78495	1.71026e-06	0.000102279	patched 1 [Source:ZFIN;Acc:ZDB-GENE-980526-196]
ENSDARG00000069735	hbaa2	893.049	3.1949	0.671019	4.76126	1.92385e-06	0.000112416	hemoglobin, alpha adult 2 [Source:ZFIN;Acc:ZDB-GENE-081104-38]
ENSDARG00000089087	hbba1	4269.32	2.44971	0.515619	4.751	2.02408e-06	0.000116274	hemoglobin, beta adult 1 [Source:NCBI gene;Acc:30216]
ENSDARG00000069734	hbba2	1439.85	2.82899	0.595525	4.75041	2.03003e-06	0.000116288	hemoglobin, beta adult 2 [Source:ZFIN;Acc:ZDB-GENE-040801-164]
ENSDARG00000070555	ldlrad4a	371.291	1.45681	0.307345	4.73999	2.13724e-06	0.000121238	low density lipoprotein receptor class A domain containing 4a [Source:ZFIN;Acc:ZDB-GENE-060503-850]
ENSDARG00000087452	peli3	436.562	1.69198	0.358003	4.72616	2.28803e-06	0.000126517	pellino E3 ubiquitin protein ligase family member 3 [Source:ZFIN;Acc:ZDB-GENE-110304-4]
ENSDARG00000054300	dhrs1	1196.42	1.13911	0.241028	4.72605	2.28925e-06	0.000126517	dehydrogenase/reductase (SDR family) member 1 [Source:ZFIN;Acc:ZDB-GENE-030616-591]
ENSDARG00000009771	ppme1	910.185	0.693051	0.146723	4.72354	2.31776e-06	0.000127746	protein phosphatase methylesterase 1 [Source:ZFIN;Acc:ZDB-GENE-030131-7064]
ENSDARG00000076847	tnrc6c1	993.095	0.995554	0.210872	4.72114	2.34526e-06	0.000128913	trinucleotide repeat containing adaptor 6C1 [Source:ZFIN;Acc:ZDB-GENE-030131-7440]
ENSDARG00000019081	DHDH	516.921	1.10619	0.234747	4.71228	2.44961e-06	0.000133721	zgc:101723 [Source:NCBI gene;Acc:449558]
ENSDARG00000042630	hebp2	544.602	1.71322	0.364209	4.70396	2.55168e-06	0.000137299	heme binding protein 2 [Source:ZFIN;Acc:ZDB-GENE-040426-914]
ENSDARG00000063330	mgat4a	545.415	1.01662	0.216301	4.70004	2.6011e-06	0.000139224	alpha-1,3-mannosyl-glycoprotein 4-beta-N-acetylglucosaminyltransferase A [Source:ZFIN;Acc:ZDB-GENE-070912-27]
ENSDARG00000012896	anos1a	212.218	1.4821	0.315486	4.69785	2.62912e-06	0.000140248	anosmin 1a [Source:ZFIN;Acc:ZDB-GENE-000201-9]
ENSDARG00000040614	sestd1	568.497	0.805179	0.171407	4.69747	2.63399e-06	0.000140248	SEC14 and spectrin domains 1 [Source:NCBI gene;Acc:360133]
ENSDARG00000060977	zgc:153018	535.412	1.63354	0.34799	4.6942	2.67646e-06	0.000141769	zgc:153018 [Source:ZFIN;Acc:ZDB-GENE-060929-752]
ENSDARG00000021979	mical3a	89.3012	1.86726	0.398365	4.6873	2.76836e-06	0.000145129	0
ENSDARG00000038618	cpt2	824.179	1.2981	0.277851	4.67193	2.98379e-06	0.000154438	carnitine palmitoyltransferase 2 [Source:NCBI gene;Acc:100005717]
ENSDARG00000052000	cav2	154.633	1.71557	0.369422	4.64394	3.41824e-06	0.000172545	caveolin 2 [Source:ZFIN;Acc:ZDB-GENE-040625-164]
ENSDARG00000037061	aldh9a1b	598.977	0.818542	0.176339	4.64187	3.45275e-06	0.000173857	aldehyde dehydrogenase 9 family, member A1b [Source:NCBI gene;Acc:399481]
ENSDARG00000014545	golim4b	74.4901	1.65147	0.355976	4.63928	3.49628e-06	0.000175615	golgi integral membrane protein 4b [Source:ZFIN;Acc:ZDB-GENE-050327-74]
ENSDARG00000020529	hacl1	708.134	0.988907	0.213222	4.63792	3.51928e-06	0.000176336	2-hydroxyacyl-CoA lyase 1 [Source:ZFIN;Acc:ZDB-GENE-040426-2058]
ENSDARG00000060549	ecel1	54.5348	1.80285	0.388945	4.63523	3.56538e-06	0.000178208	endothelin converting enzyme-like 1 [Source:ZFIN;Acc:ZDB-GENE-130530-692]
ENSDARG00000002523	hsdl2	2747.75	1.26722	0.274204	4.62144	3.81084e-06	0.000188627	hydroxysteroid dehydrogenase like 2 [Source:NCBI gene;Acc:322347]
ENSDARG00000035942	hrh3	268.795	2.15986	0.467569	4.61934	3.84965e-06	0.000189653	histamine receptor H3 [Source:ZFIN;Acc:ZDB-GENE-040724-204]
ENSDARG00000099732	gfra1a	149.003	2.0744	0.450574	4.60389	4.14669e-06	0.000202305	gdnf family receptor alpha 1a [Source:ZFIN;Acc:ZDB-GENE-010226-2]
ENSDARG00000019532	fads2	25494.7	2.03534	0.444136	4.58269	4.59021e-06	0.000220774	fatty acid desaturase 2 [Source:NCBI gene;Acc:140615]
ENSDARG00000074760	ttc7a	396.949	1.01723	0.222289	4.57617	4.73565e-06	0.000226169	tetratricopeptide repeat domain 7A [Source:ZFIN;Acc:ZDB-GENE-010319-27]
ENSDARG00000078866	sdk1a	521.389	0.999065	0.218789	4.56634	4.96308e-06	0.000235377	sidekick cell adhesion molecule 1a [Source:ZFIN;Acc:ZDB-GENE-081104-374]
ENSDARG00000011570	pou6f1	169.794	1.8248	0.401204	4.54832	5.40759e-06	0.000252929	POU class 6 homeobox 1 [Source:NCBI gene;Acc:30334]
ENSDARG00000100435	sec22bb	552.781	0.632101	0.139132	4.54319	5.54101e-06	0.000257934	SEC22 homolog B, vesicle trafficking protein b [Source:NCBI gene;Acc:327277]
ENSDARG00000005891	cyb5r3	610.204	1.21305	0.267471	4.53526	5.75324e-06	0.000263567	cytochrome b5 reductase 3 [Source:ZFIN;Acc:ZDB-GENE-030131-3281]
ENSDARG00000117275	BX537310.2	25.2121	2.10324	0.463774	4.53506	5.75858e-06	0.000263567	0
ENSDARG00000028087	aldh2.2	2142.44	1.42812	0.31537	4.5284	5.94318e-06	0.000268726	aldehyde dehydrogenase 2 family member, tandem duplicate 2 [Source:ZFIN;Acc:ZDB-GENE-030326-5]
ENSDARG00000090195	mtx3	82.9884	1.86836	0.412714	4.52701	5.98252e-06	0.000268726	metaxin 3 [Source:NCBI gene;Acc:402916]
ENSDARG00000104413	rogdi	727.793	0.648184	0.143398	4.52017	6.17896e-06	0.000275869	rogdi atypical leucine zipper [Source:NCBI gene;Acc:335642]
ENSDARG00000001898	manea	389.999	1.07507	0.237949	4.5181	6.23976e-06	0.000277833	mannosidase, endo-alpha [Source:ZFIN;Acc:ZDB-GENE-040912-87]
ENSDARG00000037020	kif1b	3356.28	0.804764	0.178483	4.50892	6.51586e-06	0.000287614	kinesin family member 1B [Source:ZFIN;Acc:ZDB-GENE-030820-1]
ENSDARG00000098451	tlcd4a	302.966	1.05961	0.235221	4.50474	6.64542e-06	0.000290816	TLC domain containing 4a [Source:ZFIN;Acc:ZDB-GENE-090402-1]
ENSDARG00000101890	pigr	772.302	1.32709	0.294712	4.50299	6.70034e-06	0.000291966	polymeric immunoglobulin receptor [Source:ZFIN;Acc:ZDB-GENE-060503-327]
ENSDARG00000016085	mbnl3	1438.41	1.39966	0.311058	4.49969	6.80538e-06	0.000295281	muscleblind-like splicing regulator 3 [Source:ZFIN;Acc:ZDB-GENE-081002-3]
ENSDARG00000008788	camk1gb	201.253	1.78963	0.398491	4.49101	7.08877e-06	0.000306274	calcium/calmodulin-dependent protein kinase IGb [Source:ZFIN;Acc:ZDB-GENE-040426-1694]
ENSDARG00000077414	zgc:194312	290.141	1.08818	0.242479	4.48773	7.19857e-06	0.000309706	zgc:194312 [Source:ZFIN;Acc:ZDB-GENE-081022-102]
ENSDARG00000042854	ephx1	1279.75	1.38443	0.30943	4.47412	7.67269e-06	0.000323283	epoxide hydrolase 1, microsomal (xenobiotic) [Source:ZFIN;Acc:ZDB-GENE-040426-913]
ENSDARG00000100691	prss35	186.366	1.95772	0.438749	4.46204	8.11815e-06	0.000338555	serine protease 35 [Source:ZFIN;Acc:ZDB-GENE-040704-55]
ENSDARG00000004687	acaa1	2431.19	1.20206	0.269438	4.46137	8.14361e-06	0.00033888	acetyl-CoA acyltransferase 1 [Source:ZFIN;Acc:ZDB-GENE-040704-48]
ENSDARG00000086927	pik3c2b	546.635	0.836504	0.187516	4.46096	8.15917e-06	0.00033888	phosphatidylinositol-4-phosphate 3-kinase, catalytic subunit type 2 beta [Source:ZFIN;Acc:ZDB-GENE-050309-145]
ENSDARG00000006791	arntl1a	355.342	1.16571	0.261866	4.45156	8.52475e-06	0.000350331	aryl hydrocarbon receptor nuclear translocator-like 1a [Source:ZFIN;Acc:ZDB-GENE-000509-1]
ENSDARG00000027978	yy1b	547.701	0.883936	0.198619	4.45042	8.57023e-06	0.000350331	YY1 transcription factor b [Source:ZFIN;Acc:ZDB-GENE-040426-2127]
ENSDARG00000055999	BRD8	292.4	1.70746	0.383761	4.44927	8.6161e-06	0.000351416	si:ch211-59d17.3 [Source:ZFIN;Acc:ZDB-GENE-091113-54]
ENSDARG00000060705	nsd1b	79.4589	2.60716	0.58617	4.44779	8.67573e-06	0.000352795	nuclear receptor binding SET domain protein 1b [Source:ZFIN;Acc:ZDB-GENE-080519-2]
ENSDARG00000042933	bloc1s6	501.05	0.943901	0.212304	4.44599	8.74876e-06	0.000353585	biogenesis of lysosomal organelles complex-1, subunit 6, pallidin [Source:ZFIN;Acc:ZDB-GENE-070112-1862]
ENSDARG00000021991	erlin1	2136.28	0.982778	0.221057	4.44581	8.75597e-06	0.000353585	ER lipid raft associated 1 [Source:NCBI gene;Acc:541490]
ENSDARG00000022509	cox4i2	355.107	1.09718	0.246947	4.443	8.8715e-06	0.000356604	cytochrome c oxidase subunit 4I2 [Source:ZFIN;Acc:ZDB-GENE-040426-1775]
ENSDARG00000058292	sephs1	288.409	1.66287	0.37433	4.44226	8.90184e-06	0.000356651	selenophosphate synthetase 1 [Source:NCBI gene;Acc:324947]
ENSDARG00000025326	myl12.2	471.084	0.670909	0.15176	4.42087	9.83048e-06	0.000387511	myosin, light chain 12, genome duplicate 2 [Source:ZFIN;Acc:ZDB-GENE-030131-9028]
ENSDARG00000100150	FQ377903.1	113.337	1.23862	0.28147	4.40053	1.07984e-05	0.000418655	uncharacterized LOC103911589 [Source:NCBI gene;Acc:103911589]
ENSDARG00000012860	tmprss4b	120.661	2.5518	0.580552	4.39546	1.10537e-05	0.000426123	transmembrane serine protease 4b [Source:ZFIN;Acc:ZDB-GENE-030131-5862]
ENSDARG00000005799	smim14	1031.01	1.52619	0.348211	4.38295	1.17084e-05	0.00044966	small integral membrane protein 14 [Source:ZFIN;Acc:ZDB-GENE-040426-22]
ENSDARG00000077815	cdc26	274.771	0.585911	0.13371	4.38196	1.17616e-05	0.000450789	cell division cycle 26 homolog [Source:NCBI gene;Acc:445501]
ENSDARG00000070127	nfxl1	342.979	0.883503	0.201693	4.38044	1.1844e-05	0.000452312	nuclear transcription factor, X-box binding-like 1 [Source:ZFIN;Acc:ZDB-GENE-110411-178]
ENSDARG00000099833	fbxo7	424.648	0.753906	0.172175	4.37872	1.1938e-05	0.000454201	F-box protein 7 [Source:ZFIN;Acc:ZDB-GENE-050913-68]
ENSDARG00000014138	acot8	94.725	1.14072	0.260588	4.37749	1.20053e-05	0.000455909	acyl-CoA thioesterase 8 [Source:ZFIN;Acc:ZDB-GENE-041010-174]
ENSDARG00000074481	ulk1b	309.928	1.46653	0.336641	4.35636	1.3224e-05	0.000492113	unc-51 like autophagy activating kinase 1 [Source:ZFIN;Acc:ZDB-GENE-071203-2]
ENSDARG00000039273	fbln5	129.043	1.5927	0.365979	4.3519	1.34965e-05	0.000499519	fibulin 5 [Source:ZFIN;Acc:ZDB-GENE-041010-54]
ENSDARG00000099600	si:dkey-93h22.7	37.6781	2.61036	0.599892	4.35138	1.35285e-05	0.000499795	si:dkey-93h22.7 [Source:ZFIN;Acc:ZDB-GENE-141216-252]
ENSDARG00000029856	cnn3b	192.556	2.05822	0.473494	4.34687	1.38093e-05	0.000507411	calponin 3, acidic b [Source:ZFIN;Acc:ZDB-GENE-050522-263]
ENSDARG00000012072	dmac2l	178.612	0.914182	0.210523	4.34244	1.40908e-05	0.000514972	distal membrane arm assembly complex 2 like [Source:ZFIN;Acc:ZDB-GENE-040426-959]
ENSDARG00000055945	asph	1409.21	1.06212	0.244671	4.34101	1.41829e-05	0.000517409	aspartate beta-hydroxylase [Source:ZFIN;Acc:ZDB-GENE-031112-5]
ENSDARG00000016611	scrn3	433.843	0.765514	0.176516	4.33681	1.44567e-05	0.000525412	secernin 3 [Source:NCBI gene;Acc:326058]
ENSDARG00000044319	fstl4	89.6274	3.07515	0.709139	4.33646	1.44795e-05	0.000525412	follistatin-like 4 [Source:ZFIN;Acc:ZDB-GENE-070127-3]
ENSDARG00000021483	cdc14b	702.853	1.0593	0.244674	4.32942	1.49503e-05	0.000538272	cell division cycle 14B [Source:ZFIN;Acc:ZDB-GENE-040426-820]
ENSDARG00000074225	si:ch211-269e2.1	313.762	1.02899	0.238051	4.32254	1.54241e-05	0.000551829	si:ch211-269e2.1 [Source:ZFIN;Acc:ZDB-GENE-070912-267]
ENSDARG00000026548	cyp2u1	227.481	1.5517	0.359947	4.3109	1.62593e-05	0.000576653	cytochrome P450, family 2, subfamily U, polypeptide 1 [Source:ZFIN;Acc:ZDB-GENE-070730-1]
ENSDARG00000017661	braf	337.393	0.946442	0.219766	4.30659	1.65788e-05	0.000586966	B-Raf proto-oncogene, serine/threonine kinase [Source:ZFIN;Acc:ZDB-GENE-040805-1]
ENSDARG00000027419	gad1b	2375.52	3.58499	0.832703	4.30525	1.668e-05	0.000588716	glutamate decarboxylase 1b [Source:ZFIN;Acc:ZDB-GENE-030909-3]
ENSDARG00000018643	igf2a	829.147	1.37651	0.32004	4.30107	1.69975e-05	0.000597637	insulin-like growth factor 2a [Source:ZFIN;Acc:ZDB-GENE-991111-3]
ENSDARG00000025513	dip2cb	461.032	0.945443	0.219866	4.30008	1.70737e-05	0.000599283	disco-interacting protein 2 homolog Cb [Source:ZFIN;Acc:ZDB-GENE-070912-589]
ENSDARG00000097017	mical3a	355.51	1.67144	0.390016	4.28556	1.8228e-05	0.000635426	microtubule associated monooxygenase, calponin and LIM domain containing 3a [Source:NCBI gene;Acc:402881]
ENSDARG00000052625	fkbp1b	213.42	1.16282	0.271764	4.27881	1.87896e-05	0.00065166	FKBP prolyl isomerase 1B [Source:ZFIN;Acc:ZDB-GENE-040426-1785]
ENSDARG00000057630	galm	374.765	1.08075	0.252702	4.27676	1.89634e-05	0.000656572	galactose mutarotase [Source:ZFIN;Acc:ZDB-GENE-040718-66]
ENSDARG00000030490	sptb	140.64	1.947	0.45554	4.27406	1.91947e-05	0.000663454	spectrin, beta, erythrocytic [Source:ZFIN;Acc:ZDB-GENE-000906-1]
ENSDARG00000018600	retsat	2471.78	1.0616	0.248518	4.27172	1.93975e-05	0.000668197	retinol saturase (all-trans-retinol 13,14-reductase) [Source:NCBI gene;Acc:325922]
ENSDARG00000014891	robo2	686.366	0.969038	0.227291	4.26341	2.01326e-05	0.000688867	roundabout, axon guidance receptor, homolog 2 (Drosophila) [Source:ZFIN;Acc:ZDB-GENE-001019-1]
ENSDARG00000099154	CABZ01032488.1	512.85	1.51	0.354469	4.25991	2.04513e-05	0.000696268	wu:fb14d09 [Source:NCBI gene;Acc:100536795]
ENSDARG00000021113	ptmaa	4188.32	1.05073	0.247694	4.24205	2.21483e-05	0.000741913	prothymosin alpha a [Source:NCBI gene;Acc:335707]
ENSDARG00000026664	uri1	554.307	0.688189	0.162247	4.24163	2.21906e-05	0.000741913	URI1 prefoldin like chaperone [Source:ZFIN;Acc:ZDB-GENE-050913-30]
ENSDARG00000029905	phyhd1	632.304	1.33672	0.315558	4.23603	2.27504e-05	0.000753164	phytanoyl-CoA dioxygenase domain containing 1 [Source:NCBI gene;Acc:492804]
ENSDARG00000089913	cacna1g	351.588	0.768164	0.181514	4.23199	2.31631e-05	0.000764344	calcium channel, voltage-dependent, T type, alpha 1G subunit [Source:ZFIN;Acc:ZDB-GENE-090514-2]
ENSDARG00000018553	ifih1	149.704	0.964528	0.228281	4.22518	2.38746e-05	0.000782758	interferon induced with helicase C domain 1 [Source:ZFIN;Acc:ZDB-GENE-081104-438]
ENSDARG00000017489	ifi45	411.808	1.40202	0.33247	4.21698	2.47601e-05	0.000809188	interferon alpha inducible protein 45 [Source:ZFIN;Acc:ZDB-GENE-051030-98]
ENSDARG00000059231	hephl1a	967.246	0.733162	0.174723	4.19613	2.7151e-05	0.000876091	hephaestin-like 1a [Source:ZFIN;Acc:ZDB-GENE-070801-4]
ENSDARG00000055672	map3k10	103.961	1.30085	0.310418	4.19064	2.78164e-05	0.000894733	mitogen-activated protein kinase kinase kinase 10 [Source:ZFIN;Acc:ZDB-GENE-050419-112]
ENSDARG00000071361	si:ch211-197g15.10	40.3676	2.25222	0.538022	4.18611	2.83779e-05	0.000911354	si:ch211-197g15.10 [Source:ZFIN;Acc:ZDB-GENE-050208-617]
ENSDARG00000079632	si:dkey-28b4.7	283.8	1.00566	0.240535	4.18095	2.90294e-05	0.000929131	si:dkey-28b4.7 [Source:ZFIN;Acc:ZDB-GENE-050506-118]
ENSDARG00000014532	aida	248.756	1.33585	0.319639	4.17924	2.92488e-05	0.000933445	axin interactor, dorsalization associated [Source:NCBI gene;Acc:393763]
ENSDARG00000053484	syne2b	816.649	1.22368	0.293188	4.17369	2.997e-05	0.000951992	spectrin repeat containing, nuclear envelope 2b [Source:ZFIN;Acc:ZDB-GENE-071218-5]
ENSDARG00000078481	uts2r2	49.1849	1.26216	0.302453	4.17307	3.00517e-05	0.0009531	urotensin-2 receptor 2 [Source:ZFIN;Acc:ZDB-GENE-081022-180]
ENSDARG00000054984	zbtb41	128.465	0.998311	0.239334	4.1712	3.02997e-05	0.000959475	zinc finger and BTB domain containing 41 [Source:ZFIN;Acc:ZDB-GENE-130530-649]
ENSDARG00000062501	hhipl1	1657.18	1.4184	0.340833	4.16156	3.16074e-05	0.000994662	HHIP-like 1 [Source:ZFIN;Acc:ZDB-GENE-090306-3]
ENSDARG00000035564	dgcr8	1028.61	0.81318	0.195576	4.15787	3.21222e-05	0.00100317	DGCR8 microprocessor complex subunit [Source:ZFIN;Acc:ZDB-GENE-030131-3421]
ENSDARG00000068602	dalrd3	428.496	0.740656	0.178341	4.15302	3.28114e-05	0.00102156	DALR anticodon binding domain containing 3 [Source:NCBI gene;Acc:571036]
ENSDARG00000046030	zgc:110339	1800.42	0.667426	0.161078	4.14348	3.42073e-05	0.00105496	zgc:110339 [Source:ZFIN;Acc:ZDB-GENE-050417-323]
ENSDARG00000103725	znf341	75.651	1.29228	0.311901	4.14322	3.42462e-05	0.00105496	zinc finger protein 341 [Source:ZFIN;Acc:ZDB-GENE-080204-99]
ENSDARG00000067520	zgc:158482	89.9875	1.19196	0.288089	4.13747	3.51164e-05	0.00108013	zgc:158482 [Source:ZFIN;Acc:ZDB-GENE-070209-32]
ENSDARG00000103551	rnf213b	247.248	1.41493	0.34242	4.13214	3.59397e-05	0.00109883	Danio rerio ring finger protein 213b (rnf213b), mRNA. [Source:RefSeq mRNA;Acc:NM_001353867]
ENSDARG00000045015	cyp27b1	334.735	4.4303	1.07576	4.11831	3.81663e-05	0.00115478	cytochrome P450, family 27, subfamily B, polypeptide 1 [Source:ZFIN;Acc:ZDB-GENE-111005-2]
ENSDARG00000017388	gstt1b	1197.25	1.47904	0.35925	4.11703	3.83794e-05	0.0011578	glutathione S-transferase theta 1b [Source:ZFIN;Acc:ZDB-GENE-040426-1491]
ENSDARG00000092659	ppp3r1a	656.47	1.17612	0.286382	4.10683	4.01119e-05	0.00119942	protein phosphatase 3, regulatory subunit B, alpha a [Source:ZFIN;Acc:ZDB-GENE-081113-3]
ENSDARG00000011498	si:ch211-212o1.2	279.744	1.23811	0.301736	4.10328	4.07328e-05	0.00121442	si:ch211-212o1.2 [Source:ZFIN;Acc:ZDB-GENE-041111-310]
ENSDARG00000054250	crbn	245.365	0.689363	0.168065	4.10177	4.10006e-05	0.00121884	cereblon [Source:NCBI gene;Acc:445491]
ENSDARG00000018002	eci1	629.6	1.33569	0.326655	4.08899	4.33254e-05	0.00128263	enoyl-CoA delta isomerase 1 [Source:ZFIN;Acc:ZDB-GENE-030131-6033]
ENSDARG00000092233	vtg1	265.861	5.05929	1.23904	4.08322	4.4415e-05	0.00130701	vitellogenin 1 [Source:ZFIN;Acc:ZDB-GENE-001201-1]
ENSDARG00000000324	dcaf8	382.879	0.62031	0.15203	4.08019	4.49991e-05	0.00131678	DDB1 and CUL4 associated factor 8 [Source:ZFIN;Acc:ZDB-GENE-070912-578]
ENSDARG00000035285	ncor1	2327.3	0.9574	0.234648	4.08016	4.50055e-05	0.00131678	nuclear receptor corepressor 1 [Source:ZFIN;Acc:ZDB-GENE-040426-993]
ENSDARG00000038900	acadm	6307.91	1.35784	0.333697	4.06907	4.72007e-05	0.00137117	acyl-CoA dehydrogenase medium chain [Source:ZFIN;Acc:ZDB-GENE-040426-1945]
ENSDARG00000032373	rnf145b	613.709	0.687461	0.169164	4.06389	4.82626e-05	0.00139014	ring finger protein 145b [Source:NCBI gene;Acc:327056]
ENSDARG00000015805	cgnl1	289.056	0.866063	0.213221	4.06181	4.86931e-05	0.00140056	cingulin-like 1 [Source:ZFIN;Acc:ZDB-GENE-071009-2]
ENSDARG00000041869	tnfrsf19	133.992	1.14612	0.282733	4.05371	5.04107e-05	0.00143981	tumor necrosis factor receptor superfamily, member 19 [Source:ZFIN;Acc:ZDB-GENE-030131-6760]
ENSDARG00000042533	gstm.1	609.113	1.7498	0.432134	4.04921	5.13911e-05	0.00145964	glutathione S-transferase mu, tandem duplicate 1 [Source:ZFIN;Acc:ZDB-GENE-030911-2]
ENSDARG00000042045	hmg20b	316.03	0.829596	0.205358	4.03975	5.35087e-05	0.00151409	high mobility group 20B [Source:ZFIN;Acc:ZDB-GENE-030131-4258]
ENSDARG00000059109	si:dkeyp-113d7.1	319.462	0.978129	0.242132	4.03965	5.3531e-05	0.00151409	si:dkeyp-113d7.1 [Source:ZFIN;Acc:ZDB-GENE-030131-755]
ENSDARG00000058725	rfesd	15.1196	3.88362	0.961765	4.03801	5.39056e-05	0.00152057	Rieske (Fe-S) domain containing [Source:ZFIN;Acc:ZDB-GENE-050417-254]
ENSDARG00000043848	sod1	2085.06	1.19042	0.295265	4.03171	5.53727e-05	0.0015561	superoxide dismutase 1, soluble [Source:NCBI gene;Acc:30553]
ENSDARG00000078014	pacsin2	520.928	0.612131	0.151833	4.0316	5.53979e-05	0.0015561	protein kinase C and casein kinase substrate in neurons 2 [Source:ZFIN;Acc:ZDB-GENE-040426-2596]
ENSDARG00000069940	ppap2d	666.079	0.843661	0.209573	4.02562	5.68247e-05	0.0015883	phosphatidic acid phosphatase type 2D [Source:ZFIN;Acc:ZDB-GENE-061201-42]
ENSDARG00000078473	nucks1a	1220.01	1.3172	0.327853	4.01767	5.87775e-05	0.0016375	nuclear casein kinase and cyclin-dependent kinase substrate 1a [Source:ZFIN;Acc:ZDB-GENE-040912-175]
ENSDARG00000005464	dnase1l1	274.328	1.02681	0.256005	4.01091	6.04857e-05	0.00167113	deoxyribonuclease I-like 1 [Source:ZFIN;Acc:ZDB-GENE-040426-2170]
ENSDARG00000041381	arntl2	126.713	1.08644	0.270899	4.01052	6.05848e-05	0.00167113	aryl hydrocarbon receptor nuclear translocator-like 2 [Source:ZFIN;Acc:ZDB-GENE-000509-2]
ENSDARG00000035562	mpdu1a	157.561	1.15394	0.287749	4.01023	6.06584e-05	0.00167113	mannose-P-dolichol utilization defect 1a [Source:ZFIN;Acc:ZDB-GENE-040912-9]
ENSDARG00000058801	rev3l	529.969	0.903036	0.225197	4.00999	6.07223e-05	0.00167113	REV3 like, DNA directed polymerase zeta catalytic subunit [Source:ZFIN;Acc:ZDB-GENE-050302-55]
ENSDARG00000038228	selenow2a	1429.35	0.847965	0.211565	4.00807	6.12181e-05	0.00167839	selenoprotein W, 2a [Source:ZFIN;Acc:ZDB-GENE-030428-1]
ENSDARG00000021135	dhrs4	989.366	1.21622	0.303621	4.00573	6.18266e-05	0.00169232	dehydrogenase/reductase (SDR family) member 4 [Source:ZFIN;Acc:ZDB-GENE-040426-1498]
ENSDARG00000098589	cyb5a	5268.04	0.844709	0.210913	4.00502	6.20122e-05	0.00169293	cytochrome b5 type A (microsomal) [Source:ZFIN;Acc:ZDB-GENE-040426-2148]
ENSDARG00000015822	sesn3	578.448	1.15272	0.287903	4.00385	6.23204e-05	0.00169679	sestrin 3 [Source:ZFIN;Acc:ZDB-GENE-040426-2924]
ENSDARG00000093382	uqcc3	287.53	1.01239	0.253259	3.99743	6.40334e-05	0.00173648	ubiquinol-cytochrome c reductase complex assembly factor 3 [Source:NCBI gene;Acc:558925]
ENSDARG00000059680	fscn1a	1129.17	0.993215	0.248587	3.99544	6.45744e-05	0.00174883	fascin actin-bundling protein 1a [Source:ZFIN;Acc:ZDB-GENE-031009-1]
ENSDARG00000069501	abhd11	186.977	0.889102	0.222612	3.99395	6.4981e-05	0.0017518	abhydrolase domain containing 11 [Source:NCBI gene;Acc:446169]
ENSDARG00000011545	arrb2b	1869.36	0.673407	0.168637	3.99323	6.51783e-05	0.0017518	arrestin, beta 2b [Source:ZFIN;Acc:ZDB-GENE-040426-1332]
ENSDARG00000027658	irf10	167.248	1.29989	0.325866	3.98903	6.63446e-05	0.00177788	interferon regulatory factor 10 [Source:ZFIN;Acc:ZDB-GENE-040426-2084]
ENSDARG00000099453	elof1	662.731	0.61574	0.154671	3.98095	6.86397e-05	0.00182784	ELF1 homolog, elongation factor 1 [Source:ZFIN;Acc:ZDB-GENE-040426-1385]
ENSDARG00000098453	pank4	707.429	0.717561	0.180642	3.97227	7.11898e-05	0.0018928	pantothenate kinase 4 (inactive) [Source:ZFIN;Acc:ZDB-GENE-040426-1592]
ENSDARG00000011422	ryr1a	95.0911	2.23634	0.563122	3.97133	7.14718e-05	0.00189782	ryanodine receptor 1a (skeletal) [Source:ZFIN;Acc:ZDB-GENE-020108-2]
ENSDARG00000015252	st3gal3b	552.526	0.980692	0.247069	3.96931	7.20824e-05	0.00190906	ST3 beta-galactoside alpha-2,3-sialyltransferase 3b [Source:ZFIN;Acc:ZDB-GENE-050411-13]
ENSDARG00000013973	pex3	383.653	0.753115	0.18982	3.96752	7.26253e-05	0.00191615	peroxisomal biogenesis factor 3 [Source:ZFIN;Acc:ZDB-GENE-040426-979]
ENSDARG00000055225	dock8	1160.2	0.783214	0.19749	3.96584	7.31365e-05	0.00192697	dedicator of cytokinesis 8 [Source:ZFIN;Acc:ZDB-GENE-060503-743]
ENSDARG00000038643	alas2	345.594	1.92279	0.486477	3.95248	7.73465e-05	0.00202221	aminolevulinate, delta-, synthase 2 [Source:NCBI gene;Acc:64607]
ENSDARG00000004167	zgc:110366	85.5106	1.55439	0.393368	3.95149	7.76669e-05	0.00202799	zgc:110366 [Source:ZFIN;Acc:ZDB-GENE-050417-302]
ENSDARG00000012915	ech1	928.888	0.960936	0.243294	3.9497	7.82493e-05	0.00203808	enoyl CoA hydratase 1, peroxisomal [Source:ZFIN;Acc:ZDB-GENE-041010-170]
ENSDARG00000019838	ugdh	1628.66	0.926285	0.234521	3.94969	7.8253e-05	0.00203808	UDP-glucose 6-dehydrogenase [Source:ZFIN;Acc:ZDB-GENE-011022-1]
ENSDARG00000059226	zbtb8a	44.6649	2.17252	0.550757	3.9446	7.99322e-05	0.00207387	zinc finger and BTB domain containing 8A [Source:ZFIN;Acc:ZDB-GENE-060421-5153]
ENSDARG00000105239	ecm1b	752.247	1.15988	0.294207	3.94238	8.06755e-05	0.00208255	extracellular matrix protein 1b [Source:ZFIN;Acc:ZDB-GENE-121204-2]
ENSDARG00000020642	gtdc1	78.3791	0.803252	0.203851	3.94039	8.13477e-05	0.0020946	glycosyltransferase-like domain containing 1 [Source:NCBI gene;Acc:550132]
ENSDARG00000070416	zgc:162816	370.595	1.71199	0.434588	3.93934	8.17066e-05	0.0020959	zgc:162816 [Source:ZFIN;Acc:ZDB-GENE-070410-94]
ENSDARG00000017431	mindy2	72.6962	1.13412	0.288061	3.93708	8.24796e-05	0.00211042	MINDY lysine 48 deubiquitinase 2 [Source:ZFIN;Acc:ZDB-GENE-030616-328]
ENSDARG00000024564	sccpdhb	400.478	0.599395	0.15239	3.9333	8.37865e-05	0.0021385	saccharopine dehydrogenase b [Source:ZFIN;Acc:ZDB-GENE-041010-211]
ENSDARG00000087181	cbx7b	86.9045	1.59509	0.405666	3.93204	8.42271e-05	0.00214505	chromobox homolog 7b [Source:ZFIN;Acc:ZDB-GENE-110613-2]
ENSDARG00000069594	kif13a	120.595	1.59649	0.406944	3.92313	8.74046e-05	0.00221147	kinesin family member 13A [Source:ZFIN;Acc:ZDB-GENE-090901-1]
ENSDARG00000062449	xpr1a	297.558	2.22939	0.568399	3.92223	8.77348e-05	0.00221433	xenotropic and polytropic retrovirus receptor 1a [Source:ZFIN;Acc:ZDB-GENE-060503-362]
ENSDARG00000012194	scp2a	5223.41	1.19608	0.305189	3.91916	8.88586e-05	0.00223715	sterol carrier protein 2a [Source:ZFIN;Acc:ZDB-GENE-040426-1846]
ENSDARG00000029609	macrod1	323.044	1.06764	0.273049	3.91007	9.22709e-05	0.00230598	mono-ADP ribosylhydrolase 1 [Source:ZFIN;Acc:ZDB-GENE-040912-100]
ENSDARG00000092667	si:ch211-271e10.2	175.168	1.34137	0.343214	3.90826	9.29625e-05	0.00232019	si:ch211-271e10.2 [Source:ZFIN;Acc:ZDB-GENE-060526-146]
ENSDARG00000078389	ifi46	462.593	1.37386	0.351579	3.90769	9.31809e-05	0.00232019	interferon alpha inducible protein 46 [Source:ZFIN;Acc:ZDB-GENE-090312-190]
ENSDARG00000092895	si:dkey-188i13.11	366.592	0.868874	0.222389	3.907	9.34476e-05	0.002324	si:dkey-188i13.11 [Source:ZFIN;Acc:ZDB-GENE-090313-209]
ENSDARG00000070959	si:ch211-288g17.3	1272.55	1.19033	0.304995	3.90277	9.50976e-05	0.00235928	si:ch211-288g17.3 [Source:ZFIN;Acc:ZDB-GENE-030131-461]
ENSDARG00000056378	ifi30	4180.26	1.27366	0.326644	3.89923	9.65005e-05	0.00238249	IFI30 lysosomal thiol reductase [Source:NCBI gene;Acc:336503]
ENSDARG00000036878	sh3bgrl2	351.614	0.973072	0.249659	3.8976	9.7149e-05	0.00238694	SH3 domain binding glutamate-rich protein like 2 [Source:NCBI gene;Acc:431744]
ENSDARG00000096546	nrp2a	255.66	1.72493	0.443033	3.89346	9.88259e-05	0.0024194	neuropilin 2a [Source:ZFIN;Acc:ZDB-GENE-040611-2]
ENSDARG00000002506	C7H16orf87	295.505	0.927681	0.238694	3.88648	0.000101706	0.00247449	zgc:92818 [Source:NCBI gene;Acc:436785]
ENSDARG00000061629	ndufaf5	270.051	0.684568	0.176568	3.87709	0.000105715	0.00255348	NADH:ubiquinone oxidoreductase complex assembly factor 5 [Source:NCBI gene;Acc:794020]
ENSDARG00000101199	rbp4	13544.7	1.76636	0.456069	3.87301	0.000107499	0.00258517	retinol binding protein 4, plasma [Source:ZFIN;Acc:ZDB-GENE-000210-19]
ENSDARG00000007241	mycb	940.149	1.43302	0.370338	3.86949	0.000109065	0.00260746	MYC proto-oncogene, bHLH transcription factor b [Source:NCBI gene;Acc:393141]
ENSDARG00000102035	slc52a2	125.687	0.920372	0.237903	3.86869	0.000109422	0.00261256	solute carrier family 52 member 2 [Source:ZFIN;Acc:ZDB-GENE-030131-2552]
ENSDARG00000102744	mgst3a	1493.1	1.76099	0.455404	3.86687	0.00011024	0.00262325	microsomal glutathione S-transferase 3a [Source:ZFIN;Acc:ZDB-GENE-040426-2767]
ENSDARG00000028816	tmed3	611.934	0.84362	0.218363	3.86339	0.000111826	0.00264863	transmembrane p24 trafficking protein 3 [Source:ZFIN;Acc:ZDB-GENE-030131-8335]
ENSDARG00000112527	FP325130.1	237.901	0.908304	0.235742	3.85297	0.000116696	0.00274801	0
ENSDARG00000044669	hp1bp3	1190.16	1.50971	0.392208	3.84925	0.00011848	0.00277719	heterochromatin protein 1, binding protein 3 [Source:ZFIN;Acc:ZDB-GENE-060810-79]
ENSDARG00000101008	soul4	507.227	0.911851	0.237175	3.84464	0.000120731	0.00282023	heme-binding protein soul4 [Source:ZFIN;Acc:ZDB-GENE-110718-1]
ENSDARG00000071586	tgfbi	1484.92	1.51802	0.395079	3.84231	0.000121881	0.00283763	transforming growth factor, beta-induced [Source:ZFIN;Acc:ZDB-GENE-030131-73]
ENSDARG00000015749	hps3	227.83	0.924006	0.240844	3.83653	0.000124784	0.00289502	HPS3 biogenesis of lysosomal organelles complex 2 subunit 1 [Source:ZFIN;Acc:ZDB-GENE-061110-115]
ENSDARG00000068967	zgc:153372	137.215	0.848258	0.221161	3.83548	0.000125319	0.00290294	zgc:153372 [Source:ZFIN;Acc:ZDB-GENE-060929-680]
ENSDARG00000029292	zgc:55943	370.727	0.91166	0.237819	3.83341	0.000126378	0.00292202	zgc:55943 [Source:ZFIN;Acc:ZDB-GENE-040426-2013]
ENSDARG00000098374	0	1010.14	0.968382	0.252673	3.83255	0.000126824	0.0029276	filamin B [Source:HGNC Symbol;Acc:HGNC:3755]
ENSDARG00000078703	unm_hu7910	226.325	0.971481	0.253492	3.83239	0.000126906	0.0029276	un-named hu7910 [Source:ZFIN;Acc:ZDB-GENE-120727-22]
ENSDARG00000018266	mthfd1a	110.684	1.28426	0.335374	3.82934	0.000128489	0.00295741	methylenetetrahydrofolate dehydrogenase (NADP+ dependent) 1a, methenyltetrahydrofolate cyclohydrolase, formyltetrahydrofolate synthetase [Source:ZFIN;Acc:ZDB-GENE-041001-127]
ENSDARG00000092634	CABZ01000634.1	2647.23	4.04856	1.05937	3.82167	0.000132549	0.00301682	interferon-induced protein 44 [Source:NCBI gene;Acc:103909973]
ENSDARG00000062382	snapin	333.977	0.676845	0.177202	3.81963	0.000133653	0.00303856	SNAP associated protein [Source:ZFIN;Acc:ZDB-GENE-060503-343]
ENSDARG00000074742	elmod3	79.1894	1.52541	0.399413	3.81913	0.000133922	0.00304127	ELMO/CED-12 domain containing 3 [Source:ZFIN;Acc:ZDB-GENE-091204-471]
ENSDARG00000004115	mgat4b	225.392	0.996347	0.260996	3.81748	0.000134824	0.00305836	alpha-1,3-mannosyl-glycoprotein 4-beta-N-acetylglucosaminyltransferase B [Source:NCBI gene;Acc:431727]
ENSDARG00000077901	herc1	2329.57	0.762664	0.200334	3.80697	0.000140681	0.00317708	HECT and RLD domain containing E3 ubiquitin protein ligase family member 1 [Source:ZFIN;Acc:ZDB-GENE-030131-8542]
ENSDARG00000075859	mcf2la	427.655	0.889638	0.233865	3.80407	0.000142336	0.00319676	mcf.2 cell line derived transforming sequence-like a [Source:ZFIN;Acc:ZDB-GENE-090312-122]
ENSDARG00000103253	zgc:112023	156.907	1.12749	0.296592	3.80148	0.000143837	0.00322337	zgc:112023 [Source:NCBI gene;Acc:550368]
ENSDARG00000058369	mex3b	339.91	2.1431	0.564128	3.79896	0.000145307	0.00325274	mex-3 RNA binding family member B [Source:ZFIN;Acc:ZDB-GENE-030131-2628]
ENSDARG00000030104	sh3bp4	66.3591	1.27771	0.336425	3.79791	0.000145922	0.00326293	SH3-domain binding protein 4 [Source:ZFIN;Acc:ZDB-GENE-081104-509]
ENSDARG00000042133	si:dkey-51e6.1	343.672	0.961555	0.25345	3.79386	0.000148323	0.00331297	si:dkey-51e6.1 [Source:ZFIN;Acc:ZDB-GENE-041014-198]
ENSDARG00000097102	si:ch73-281n10.2	1493.39	1.06192	0.279925	3.79359	0.000148485	0.00331298	si:ch73-281n10.2 [Source:ZFIN;Acc:ZDB-GENE-131120-172]
ENSDARG00000102412	eci2	1744.88	0.875273	0.230952	3.78984	0.000150742	0.00334868	enoyl-CoA delta isomerase 2 [Source:ZFIN;Acc:ZDB-GENE-040718-392]
ENSDARG00000100753	CABZ01076275.1	3514.11	0.774713	0.204497	3.78838	0.00015163	0.0033641	scavenger receptor class B, member 2b [Source:NCBI gene;Acc:564077]
ENSDARG00000059093	ank1a	206.546	2.32003	0.613494	3.78166	0.000155784	0.00342782	ankyrin 1, erythrocytic a [Source:ZFIN;Acc:ZDB-GENE-041010-44]
ENSDARG00000052396	pkz	91.8776	1.56337	0.413415	3.78161	0.000155817	0.00342782	protein kinase containing Z-DNA binding domains [Source:ZFIN;Acc:ZDB-GENE-050301-2]
ENSDARG00000104845	mipol1	80.9626	0.819684	0.21686	3.77978	0.000156968	0.003442	mirror-image polydactyly 1 [Source:ZFIN;Acc:ZDB-GENE-030131-41]
ENSDARG00000096917	si:ch211-227m13.1	56.5972	2.34595	0.621153	3.77677	0.000158874	0.00346145	si:ch211-227m13.1 [Source:ZFIN;Acc:ZDB-GENE-131121-45]
ENSDARG00000001578	echs1	1303.87	1.0266	0.271887	3.77583	0.000159477	0.00346719	enoyl CoA hydratase, short chain, 1, mitochondrial [Source:ZFIN;Acc:ZDB-GENE-030616-617]
ENSDARG00000068981	glceb	334.22	0.79173	0.209903	3.77188	0.000162021	0.00351126	glucuronic acid epimerase b [Source:NCBI gene;Acc:100007670]
ENSDARG00000073962	ccdc32	277.478	0.621343	0.165691	3.75002	0.000176823	0.0037562	coiled-coil domain containing 32 [Source:ZFIN;Acc:ZDB-GENE-131127-581]
ENSDARG00000092394	dcun1d4	597.317	1.1235	0.299906	3.74618	0.000179546	0.00381008	DCN1, defective in cullin neddylation 1, domain containing 4 (S. cerevisiae) [Source:NCBI gene;Acc:556765]
ENSDARG00000093235	TST	781.179	0.930522	0.249046	3.73635	0.000186713	0.00394138	zgc:162544 [Source:ZFIN;Acc:ZDB-GENE-030131-9020]
ENSDARG00000037501	aasdhppt	72.5622	0.932963	0.249715	3.7361	0.000186893	0.00394138	aminoadipate-semialdehyde dehydrogenase-phosphopantetheinyl transferase [Source:ZFIN;Acc:ZDB-GENE-050913-36]
ENSDARG00000101291	txndc11	523.372	0.587208	0.157274	3.73368	0.000188704	0.00397546	thioredoxin domain containing 11 [Source:ZFIN;Acc:ZDB-GENE-041008-112]
ENSDARG00000054963	alg1	149.827	0.652153	0.174709	3.7328	0.000189365	0.00398526	ALG1 chitobiosyldiphosphodolichol beta-mannosyltransferase [Source:ZFIN;Acc:ZDB-GENE-030131-6093]
ENSDARG00000018691	phf2	345.505	0.957294	0.256598	3.73071	0.00019094	0.00401012	PHD finger protein 2 [Source:NCBI gene;Acc:503778]
ENSDARG00000069009	si:ch211-147a11.3	426.231	0.616586	0.165351	3.72895	0.000192278	0.00403408	si:ch211-147a11.3 [Source:NCBI gene;Acc:795658]
ENSDARG00000038876	zgc:101569	688.964	0.824249	0.221128	3.72748	0.000193404	0.00404389	zgc:101569 [Source:ZFIN;Acc:ZDB-GENE-041010-72]
ENSDARG00000004527	pin4	257.886	0.720816	0.193394	3.72719	0.000193624	0.00404389	protein (peptidylprolyl cis/trans isomerase) NIMA-interacting, 4 (parvulin) [Source:NCBI gene;Acc:553574]
ENSDARG00000070624	cacng7b	260.697	1.18778	0.318788	3.72593	0.000194597	0.00405386	calcium channel, voltage-dependent, gamma subunit 7b [Source:ZFIN;Acc:ZDB-GENE-100921-51]
ENSDARG00000012881	slc4a1a	337.26	2.04325	0.548414	3.72574	0.000194746	0.00405386	solute carrier family 4 member 1a (Diego blood group) [Source:ZFIN;Acc:ZDB-GENE-010525-1]
ENSDARG00000102110	CABZ01080375.1	145.93	1.50673	0.404419	3.72565	0.000194811	0.00405386	0
ENSDARG00000005842	cd9a	1749.88	0.985721	0.26477	3.72293	0.000196922	0.00408944	CD9 molecule a [Source:ZFIN;Acc:ZDB-GENE-030131-1175]
ENSDARG00000110963	trib1	234.146	1.4895	0.400371	3.72029	0.000198991	0.00412819	tribbles pseudokinase 1 [Source:ZFIN;Acc:ZDB-GENE-091207-4]
ENSDARG00000109823	pdxp	177.788	1.0558	0.283826	3.71988	0.000199319	0.00413082	pyridoxal (pyridoxine, vitamin B6) phosphatase [Source:ZFIN;Acc:ZDB-GENE-080723-69]
ENSDARG00000057368	rps8b	403.075	1.2332	0.331573	3.71926	0.000199807	0.00413253	ribosomal protein S8b [Source:ZFIN;Acc:ZDB-GENE-050522-202]
ENSDARG00000023290	fabp3	7490.53	1.12774	0.303347	3.71765	0.000201084	0.00415472	fatty acid binding protein 3, muscle and heart [Source:ZFIN;Acc:ZDB-GENE-020318-2]
ENSDARG00000021677	phf11	128.982	0.994774	0.267705	3.71593	0.00020246	0.00417469	PHD finger protein 11 [Source:ZFIN;Acc:ZDB-GENE-081104-417]
ENSDARG00000078686	arl8a	1189.76	0.653343	0.175856	3.71522	0.000203026	0.00418004	ADP-ribosylation factor-like 8A [Source:ZFIN;Acc:ZDB-GENE-030131-5025]
ENSDARG00000034048	zgc:92275	841.513	1.64079	0.441685	3.71484	0.000203335	0.00418004	zgc:92275 [Source:ZFIN;Acc:ZDB-GENE-040718-356]
ENSDARG00000018460	mbnl2	1147.95	0.622364	0.167762	3.7098	0.00020742	0.00425116	muscleblind-like splicing regulator 2 [Source:ZFIN;Acc:ZDB-GENE-030131-9582]
ENSDARG00000012453	rnls	134.615	0.941201	0.254167	3.70308	0.000212998	0.00433933	renalase, FAD-dependent amine oxidase [Source:ZFIN;Acc:ZDB-GENE-040718-351]
ENSDARG00000096725	si:dkey-21c1.1	273.706	0.633024	0.170978	3.70237	0.000213593	0.00434591	si:dkey-21c1.1 [Source:ZFIN;Acc:ZDB-GENE-130603-45]
ENSDARG00000062108	iffo1b	96.0131	1.54768	0.418716	3.69624	0.000218818	0.00442802	intermediate filament family orphan 1b [Source:ZFIN;Acc:ZDB-GENE-050208-308]
ENSDARG00000098368	aplp1	4782.33	1.4723	0.398809	3.69175	0.000222715	0.00448797	amyloid beta (A4) precursor-like protein 1 [Source:ZFIN;Acc:ZDB-GENE-040319-1]
ENSDARG00000038881	acaa2	2436.01	1.23416	0.334567	3.68884	0.000225283	0.00452185	acetyl-CoA acyltransferase 2 [Source:ZFIN;Acc:ZDB-GENE-040426-1996]
ENSDARG00000069998	si:ch211-145b13.6	105.762	1.45174	0.393721	3.68723	0.000226711	0.00454604	si:ch211-145b13.6 [Source:ZFIN;Acc:ZDB-GENE-090313-36]
ENSDARG00000079698	asb13a.1	59.6762	1.53005	0.415035	3.68656	0.000227308	0.00455352	ankyrin repeat and SOCS box containing 13a, tandem duplicate 1 [Source:ZFIN;Acc:ZDB-GENE-040718-261]
ENSDARG00000079175	si:ch211-79k12.1	3345.52	1.17311	0.318469	3.68359	0.000229972	0.00459085	si:ch211-79k12.1 [Source:ZFIN;Acc:ZDB-GENE-080303-9]
ENSDARG00000092228	si:dkey-27p18.3	316.635	0.901624	0.244845	3.68243	0.00023102	0.00460077	si:dkey-27p18.3 [Source:ZFIN;Acc:ZDB-GENE-060526-287]
ENSDARG00000036442	atp11c	771.822	0.856382	0.232708	3.68007	0.000233172	0.0046391	ATPase phospholipid transporting 11C [Source:ZFIN;Acc:ZDB-GENE-030616-51]
ENSDARG00000092949	si:ch73-366i20.1	70.973	2.87716	0.782737	3.67577	0.000237132	0.00469955	si:ch73-366i20.1 [Source:ZFIN;Acc:ZDB-GENE-070912-338]
ENSDARG00000038901	tmem256	178.374	0.906176	0.246584	3.67492	0.000237927	0.00471072	transmembrane protein 256 [Source:NCBI gene;Acc:550283]
ENSDARG00000024537	emilin1a	132.239	1.26015	0.343059	3.67328	0.000239457	0.00472724	elastin microfibril interfacer 1a [Source:ZFIN;Acc:ZDB-GENE-041001-191]
ENSDARG00000067626	ywhag1	605.919	1.29162	0.35197	3.66969	0.000242847	0.00478693	3-monooxygenase/tryptophan 5-monooxygenase activation protein, gamma polypeptide 1 [Source:NCBI gene;Acc:117604]
ENSDARG00000017266	scml4	36.1066	1.55544	0.423873	3.66958	0.00024295	0.00478693	Scm polycomb group protein like 4 [Source:ZFIN;Acc:ZDB-GENE-041210-338]
ENSDARG00000074638	loxhd1b	210.265	1.46331	0.39906	3.66688	0.000245524	0.0048144	lipoxygenase homology domains 1b [Source:ZFIN;Acc:ZDB-GENE-081104-370]
ENSDARG00000116835	park7	887.596	0.837511	0.228623	3.66328	0.000249006	0.00485704	parkinson protein 7 [Source:NCBI gene;Acc:449674]
ENSDARG00000040352	crot	972.445	1.04188	0.284492	3.66223	0.000250032	0.00487002	carnitine O-octanoyltransferase [Source:ZFIN;Acc:ZDB-GENE-050522-35]
ENSDARG00000061208	rab40c	542.173	0.620226	0.169573	3.65757	0.000254613	0.00494978	RAB40c, member RAS oncogene family [Source:ZFIN;Acc:ZDB-GENE-030515-1]
ENSDARG00000103824	hint1	828.814	1.00462	0.274934	3.65404	0.000258141	0.00500767	histidine triad nucleotide binding protein 1 [Source:ZFIN;Acc:ZDB-GENE-040927-8]
ENSDARG00000100725	ephb4a	276.452	0.836449	0.229285	3.64807	0.000264215	0.00510239	eph receptor B4a [Source:NCBI gene;Acc:30688]
ENSDARG00000062864	gk5	613.151	0.89517	0.245437	3.64725	0.000265064	0.00511147	glycerol kinase 5 [Source:NCBI gene;Acc:777765]
ENSDARG00000043361	nck2b	131.538	1.18888	0.325999	3.64689	0.000265432	0.00511147	NCK adaptor protein 2b [Source:ZFIN;Acc:ZDB-GENE-040801-235]
ENSDARG00000070673	ptgr2	204.334	0.650347	0.178329	3.64689	0.000265437	0.00511147	prostaglandin reductase 2 [Source:ZFIN;Acc:ZDB-GENE-050506-71]
ENSDARG00000100624	CABZ01066312.1	345.13	0.901577	0.247541	3.64213	0.000270388	0.00517749	si:cabz01066312.1 [Source:NCBI gene;Acc:100537698]
ENSDARG00000055151	smyd2a	547.831	1.04068	0.285921	3.63975	0.0002729	0.00521091	SET and MYND domain containing 2a [Source:NCBI gene;Acc:541423]
ENSDARG00000035763	stx18	251.4	0.645729	0.17745	3.63893	0.000273777	0.00521584	syntaxin 18 [Source:NCBI gene;Acc:554130]
ENSDARG00000102421	acp7	230.871	1.2128	0.333406	3.63761	0.000275182	0.00523	acid phosphatase 7, tartrate resistant (putative) [Source:NCBI gene;Acc:571830]
ENSDARG00000079133	si:dkey-10c21.1	75.6005	1.10733	0.304585	3.63554	0.000277401	0.0052526	si:dkey-10c21.1 [Source:ZFIN;Acc:ZDB-GENE-081104-302]
ENSDARG00000102945	ccl39.2	1805.02	2.09679	0.577304	3.63203	0.000281199	0.0052999	chemokine (C-C motif) ligand 39, duplicate 2 [Source:ZFIN;Acc:ZDB-GENE-131120-38]
ENSDARG00000102305	svbp	242.049	0.593585	0.163533	3.62976	0.00028368	0.00534172	small vasohibin binding protein [Source:NCBI gene;Acc:798425]
ENSDARG00000106522	LRRTM4	12.231	4.68482	1.29106	3.62866	0.000284899	NA	leucine rich repeat transmembrane neuronal 4 [Source:HGNC Symbol;Acc:HGNC:19411]
ENSDARG00000101176	ugt1b7	44.1716	1.80879	0.49855	3.62811	0.000285503	0.00537108	UDP glucuronosyltransferase 1 family, polypeptide B7 [Source:ZFIN;Acc:ZDB-GENE-080227-15]
ENSDARG00000058032	tpk2	162.903	1.49325	0.412331	3.62147	0.000292929	0.00547997	thiamin pyrophosphokinase 2 [Source:ZFIN;Acc:ZDB-GENE-060503-173]
ENSDARG00000079605	prmt5	243.418	1.02129	0.282021	3.6213	0.000293124	0.00547997	protein arginine methyltransferase 5 [Source:ZFIN;Acc:ZDB-GENE-030616-585]
ENSDARG00000011459	gsna	862.258	0.957184	0.26443	3.6198	0.00029483	0.00550592	gelsolin a [Source:ZFIN;Acc:ZDB-GENE-030131-9653]
ENSDARG00000019525	tbcelb	187.246	0.785376	0.217053	3.61835	0.000296484	0.00552669	tubulin folding cofactor E-like b [Source:ZFIN;Acc:ZDB-GENE-100921-13]
ENSDARG00000042777	ndufa11	399.604	0.735897	0.20347	3.61673	0.000298344	0.0055512	NADH:ubiquinone oxidoreductase subunit A11 [Source:ZFIN;Acc:ZDB-GENE-040426-1631]
ENSDARG00000076667	ccng1	6481.18	0.699892	0.193798	3.61146	0.000304482	0.00564995	cyclin G1 [Source:ZFIN;Acc:ZDB-GENE-020322-1]
ENSDARG00000037679	MPC2	705.977	0.917271	0.254246	3.60781	0.000308793	0.00571953	zgc:103678 [Source:ZFIN;Acc:ZDB-GENE-040912-107]
ENSDARG00000076246	prune	71.2514	1.15469	0.320249	3.60561	0.000311426	0.00575786	prune exopolyphosphatase [Source:ZFIN;Acc:ZDB-GENE-100609-1]
ENSDARG00000100232	glis2b	89.4872	1.48361	0.411547	3.60495	0.000312216	0.00576673	GLIS family zinc finger 2b [Source:ZFIN;Acc:ZDB-GENE-091204-120]
ENSDARG00000093448	mpc1	1889.18	0.973816	0.270321	3.60244	0.000315241	0.00580733	mitochondrial pyruvate carrier 1 [Source:ZFIN;Acc:ZDB-GENE-040718-94]
ENSDARG00000013274	eif4eb	407.77	0.77794	0.215996	3.60164	0.00031622	0.00582011	eukaryotic translation initiation factor 4eb [Source:ZFIN;Acc:ZDB-GENE-041121-14]
ENSDARG00000055856	tor1l1	60.1153	1.64769	0.45759	3.6008	0.000317237	0.00582306	torsin family 1 like 1 [Source:ZFIN;Acc:ZDB-GENE-080723-36]
ENSDARG00000057262	si:dkey-91i10.3	1200.54	1.18083	0.328033	3.59975	0.000318529	0.00584151	si:dkey-91i10.3 [Source:ZFIN;Acc:ZDB-GENE-081105-124]
ENSDARG00000017986	vps13d	1186.13	0.631158	0.175465	3.59706	0.000321838	0.00589689	vacuolar protein sorting 13 homolog D [Source:ZFIN;Acc:ZDB-GENE-050912-1]
ENSDARG00000077788	arhgef10	126.237	0.952115	0.264885	3.59445	0.000325081	0.00594506	Rho guanine nucleotide exchange factor (GEF) 10 [Source:ZFIN;Acc:ZDB-GENE-030131-6210]
ENSDARG00000086708	CR847543.1	65.9692	1.76047	0.489957	3.5931	0.000326764	0.00595992	0
ENSDARG00000078694	phlpp1	913.25	0.602764	0.167815	3.59184	0.000328348	0.0059626	PH domain and leucine rich repeat protein phosphatase 1 [Source:ZFIN;Acc:ZDB-GENE-131127-271]
ENSDARG00000096808	si:dkey-287g12.6	74.2083	1.03142	0.287181	3.59152	0.000328752	0.00596462	si:dkey-287g12.6 [Source:ZFIN;Acc:ZDB-GENE-130603-36]
ENSDARG00000033802	cyp27a7	960.249	0.915998	0.255418	3.58627	0.000335448	0.00606453	cytochrome P450, family 27, subfamily A, polypeptide 7 [Source:ZFIN;Acc:ZDB-GENE-081104-519]
ENSDARG00000025595	agmo	594.79	0.655245	0.182896	3.58261	0.000340178	0.00613916	alkylglycerol monooxygenase [Source:NCBI gene;Acc:405819]
ENSDARG00000019601	col12a1b	363.311	4.71903	1.31804	3.58034	0.000343146	0.00617225	collagen, type XII, alpha 1b [Source:ZFIN;Acc:ZDB-GENE-120215-116]
ENSDARG00000057128	hadhaa	1710.04	1.07367	0.299885	3.58027	0.000343237	0.00617225	hydroxyacyl-CoA dehydrogenase trifunctional multienzyme complex subunit alpha a [Source:ZFIN;Acc:ZDB-GENE-031222-5]
ENSDARG00000099729	pcdh10a	768.747	0.890798	0.248822	3.58005	0.000343525	0.00617225	protocadherin 10a [Source:ZFIN;Acc:ZDB-GENE-020731-1]
ENSDARG00000053446	sub1a	650.236	1.18683	0.332101	3.57371	0.000351956	0.00627532	SUB1 regulator of transcription a [Source:ZFIN;Acc:ZDB-GENE-050522-151]
ENSDARG00000099122	naa38	174.059	0.626889	0.175682	3.56831	0.000359287	0.0063768	N(alpha)-acetyltransferase 38, NatC auxiliary subunit [Source:NCBI gene;Acc:335819]
ENSDARG00000074490	casc4	625.174	0.771499	0.216255	3.56754	0.000360352	0.00637905	cancer susceptibility candidate 4 [Source:ZFIN;Acc:ZDB-GENE-091130-1]
ENSDARG00000075188	adamts10	83.9038	2.04942	0.575342	3.5621	0.000367906	0.00648805	ADAM metallopeptidase with thrombospondin type 1 motif, 10 [Source:ZFIN;Acc:ZDB-GENE-081104-414]
ENSDARG00000062420	nfia	303.865	1.12396	0.315545	3.56196	0.0003681	0.00648805	nuclear factor I/A [Source:ZFIN;Acc:ZDB-GENE-050208-501]
ENSDARG00000030166	hyi	364.313	1.46544	0.411612	3.56025	0.000370498	0.00651904	hydroxypyruvate isomerase [Source:NCBI gene;Acc:393305]
ENSDARG00000008447	fkbp4	1302.53	0.86164	0.242082	3.55929	0.000371855	0.00653165	FKBP prolyl isomerase 4 [Source:ZFIN;Acc:ZDB-GENE-030131-514]
ENSDARG00000055642	0	531.513	3.0019	0.843636	3.55829	0.000373278	0.00654457	si:ch211-217a12.1 [Source:ZFIN;Acc:ZDB-GENE-121214-95]
ENSDARG00000094646	dyrk2	404.818	0.808202	0.227429	3.55365	0.000379931	0.00661651	dual-specificity tyrosine-(Y)-phosphorylation regulated kinase 2 [Source:ZFIN;Acc:ZDB-GENE-030131-2804]
ENSDARG00000007856	rtn4rl1a	31.091	3.31117	0.932101	3.55237	0.000381772	0.00663724	reticulon 4 receptor-like 1a [Source:ZFIN;Acc:ZDB-GENE-091118-38]
ENSDARG00000074667	akt1s1	1407.31	1.02783	0.289699	3.54791	0.000388305	0.00673359	AKT1 substrate 1 (proline-rich) [Source:ZFIN;Acc:ZDB-GENE-030131-482]
ENSDARG00000039310	parla	199.375	0.96486	0.272372	3.54243	0.000396461	0.00685581	presenilin associated, rhomboid-like a [Source:NCBI gene;Acc:541485]
ENSDARG00000091584	si:ch73-217n20.1	165.542	1.06174	0.299734	3.54227	0.000396698	0.00685581	si:ch73-217n20.1 [Source:ZFIN;Acc:ZDB-GENE-110411-232]
ENSDARG00000103747	cav1	1132.47	0.953868	0.269368	3.54114	0.000398405	0.00687949	caveolin 1 [Source:ZFIN;Acc:ZDB-GENE-030131-2415]
ENSDARG00000038139	pdgfbb	114.631	1.45658	0.411394	3.54059	0.000399237	0.00688802	platelet-derived growth factor beta polypeptide b [Source:ZFIN;Acc:ZDB-GENE-131121-332]
ENSDARG00000059682	slc43a3a	16.7772	2.91085	0.822904	3.53729	0.000404251	0.00696864	solute carrier family 43 member 3a [Source:ZFIN;Acc:ZDB-GENE-110208-8]
ENSDARG00000021556	ubl3b	1146.99	0.776082	0.219496	3.53574	0.000406632	0.006981	ubiquitin-like 3b [Source:ZFIN;Acc:ZDB-GENE-040630-4]
ENSDARG00000040248	crata	1710.13	1.01055	0.286376	3.52876	0.000417509	0.007114	carnitine O-acetyltransferase a [Source:ZFIN;Acc:ZDB-GENE-040927-17]
ENSDARG00000093997	si:dkey-9i23.15	161.607	1.01541	0.287754	3.52872	0.000417567	0.007114	si:dkey-9i23.15 [Source:ZFIN;Acc:ZDB-GENE-090313-361]
ENSDARG00000042379	TMEM120A	842.668	1.20777	0.342386	3.52752	0.000419466	0.00713004	zgc:103681 [Source:ZFIN;Acc:ZDB-GENE-041010-17]
ENSDARG00000091602	si:dkey-163f14.6	116.955	2.71128	0.768944	3.52598	0.000421917	0.00715362	si:dkey-163f14.6 [Source:ZFIN;Acc:ZDB-GENE-141215-18]
ENSDARG00000079000	tp53bp1	895.037	1.01883	0.288958	3.52589	0.000422057	0.00715362	tumor protein p53 binding protein, 1 [Source:ZFIN;Acc:ZDB-GENE-030131-3695]
ENSDARG00000100462	paqr7a	57.3555	1.57744	0.44764	3.52391	0.000425234	0.00719282	progestin and adipoQ receptor family member VII, a [Source:ZFIN;Acc:ZDB-GENE-070705-346]
ENSDARG00000055970	zgc:136971	79.566	1.06959	0.303531	3.52382	0.000425369	0.00719282	zgc:136971 [Source:ZFIN;Acc:ZDB-GENE-060421-3674]
ENSDARG00000109678	dap1b	253.684	2.97144	0.843557	3.52251	0.000427478	0.0072225	death associated protein 1b [Source:ZFIN;Acc:ZDB-GENE-000511-4]
ENSDARG00000029818	srsf5a	3566.23	0.643126	0.182845	3.51733	0.000435909	0.00731044	serine and arginine rich splicing factor 5a [Source:ZFIN;Acc:ZDB-GENE-030131-7336]
ENSDARG00000078139	appl2	161.334	1.33029	0.378783	3.512	0.000444749	0.00743423	adaptor protein, phosphotyrosine interaction, PH domain and leucine zipper containing 2 [Source:ZFIN;Acc:ZDB-GENE-081016-2]
ENSDARG00000104470	syngr2b	342.021	0.93514	0.266925	3.50338	0.000459396	0.00761664	synaptogyrin 2b [Source:ZFIN;Acc:ZDB-GENE-070424-19]
ENSDARG00000055510	ypel3	469.474	2.25208	0.643041	3.50223	0.000461378	0.00764328	yippee-like 3 [Source:NCBI gene;Acc:368214]
ENSDARG00000071469	znf618	130.679	0.809493	0.231484	3.49698	0.000470563	0.0077702	zinc finger protein 618 [Source:ZFIN;Acc:ZDB-GENE-030131-2063]
ENSDARG00000068208	def8	245.31	0.694204	0.19864	3.49478	0.000474455	0.00781547	differentially expressed in FDCP 8 homolog [Source:ZFIN;Acc:ZDB-GENE-041114-96]
ENSDARG00000025032	nr3c1	1113.73	0.586157	0.168023	3.48855	0.00048565	0.00794215	nuclear receptor subfamily 3, group C, member 1 (glucocorticoid receptor) [Source:ZFIN;Acc:ZDB-GENE-050522-503]
ENSDARG00000069376	tnfsf12	98.5404	1.51488	0.434508	3.48643	0.000489514	0.00799251	TNF superfamily member 12 [Source:ZFIN;Acc:ZDB-GENE-060929-376]
ENSDARG00000026348	csad	467.433	1.7491	0.501773	3.48583	0.000490612	0.00799765	cysteine sulfinic acid decarboxylase [Source:ZFIN;Acc:ZDB-GENE-041114-36]
ENSDARG00000020191	ppef1	71.7527	3.738	1.07334	3.48261	0.000496557	0.00808809	protein phosphatase, EF-hand calcium binding domain 1 [Source:ZFIN;Acc:ZDB-GENE-080303-27]
ENSDARG00000051989	tmem187	166.516	0.853924	0.245329	3.48073	0.00050004	0.00813183	transmembrane protein 187 [Source:ZFIN;Acc:ZDB-GENE-090313-366]
ENSDARG00000076290	calr	3051.62	0.773144	0.222218	3.47921	0.000502902	0.00815885	calreticulin [Source:ZFIN;Acc:ZDB-GENE-030131-4042]
ENSDARG00000100372	alad	243.931	0.650598	0.187491	3.47002	0.000520418	0.00840957	aminolevulinate dehydratase [Source:ZFIN;Acc:ZDB-GENE-050417-123]
ENSDARG00000029019	epb41b	145.101	1.77517	0.512013	3.46704	0.00052623	0.00846298	erythrocyte membrane protein band 4.1b [Source:ZFIN;Acc:ZDB-GENE-030130-1]
ENSDARG00000112892	CT027598.2	23.7248	2.73431	0.788705	3.46683	0.000526628	0.00846298	0
ENSDARG00000012381	hsc70	439.466	2.05257	0.592621	3.46354	0.000533126	0.00854274	heat shock cognate 70 [Source:ZFIN;Acc:ZDB-GENE-040426-1221]
ENSDARG00000076699	ipmka	226.267	1.21716	0.351646	3.46133	0.000537507	0.00859716	inositol polyphosphate multikinase a [Source:ZFIN;Acc:ZDB-GENE-090312-161]
ENSDARG00000101422	hdac12	50.7273	1.19857	0.346417	3.45991	0.000540348	0.00863365	histone deacetylase 12 [Source:ZFIN;Acc:ZDB-GENE-131121-613]
ENSDARG00000026035	ube2b	223.755	0.738844	0.213553	3.45977	0.000540635	0.00863365	ubiquitin-conjugating enzyme E2B (RAD6 homolog) [Source:ZFIN;Acc:ZDB-GENE-040718-247]
ENSDARG00000103752	DUSP26	25.979	4.46804	1.29237	3.45725	0.000545717	0.00870118	dual specificity phosphatase 26 [Source:NCBI gene;Acc:570815]
ENSDARG00000040912	kdelr3	203.489	0.903247	0.261324	3.45642	0.000547394	0.00871429	KDEL endoplasmic reticulum protein retention receptor 3 [Source:NCBI gene;Acc:393613]
ENSDARG00000044954	slit1a	271.716	1.59715	0.462375	3.45422	0.000551888	0.00877214	slit homolog 1a (Drosophila) [Source:ZFIN;Acc:ZDB-GENE-030722-3]
ENSDARG00000019253	rhag	197.126	1.60508	0.464725	3.45384	0.000552671	0.00877775	Rh associated glycoprotein [Source:ZFIN;Acc:ZDB-GENE-030131-8229]
ENSDARG00000061684	slc25a17	197.625	0.915478	0.265278	3.45101	0.000558485	0.00885628	solute carrier family 25 member 17 [Source:ZFIN;Acc:ZDB-GENE-070620-4]
ENSDARG00000021405	chd3	602.716	0.748673	0.217137	3.44793	0.000564904	0.00894432	chromodomain helicase DNA binding protein 3 [Source:ZFIN;Acc:ZDB-GENE-121031-4]
ENSDARG00000086998	zgc:64002	349.719	1.62203	0.470509	3.44739	0.000566021	0.00894525	zgc:64002 [Source:ZFIN;Acc:ZDB-GENE-040426-1329]
ENSDARG00000057206	nmt1b	27.2016	2.96887	0.861663	3.44552	0.00056997	0.00898949	N-myristoyltransferase 1b [Source:ZFIN;Acc:ZDB-GENE-081222-3]
ENSDARG00000043627	tbc1d9	111.703	1.11162	0.32265	3.44527	0.00057049	0.00899072	TBC1 domain family, member 9 (with GRAM domain) [Source:ZFIN;Acc:ZDB-GENE-060810-33]
ENSDARG00000007975	fth1b	202.25	1.50241	0.436312	3.44344	0.000574373	0.00903795	ferritin, heavy polypeptide 1b [Source:ZFIN;Acc:ZDB-GENE-040912-30]
ENSDARG00000019335	hes6	155.482	1.48668	0.432308	3.43893	0.000584014	0.00916138	hes family bHLH transcription factor 6 [Source:ZFIN;Acc:ZDB-GENE-030828-5]
ENSDARG00000112435	CR769778.1	125.839	1.59433	0.463685	3.43839	0.000585185	0.00917269	protein unc-13 homolog C-like [Source:NCBI gene;Acc:110437876]
ENSDARG00000086184	FBXO48	311.273	0.819304	0.238327	3.43774	0.0005866	0.00918077	si:dkey-202b17.4 [Source:ZFIN;Acc:ZDB-GENE-121214-308]
ENSDARG00000068910	nos1	155.857	2.64425	0.769233	3.43752	0.000587067	0.00918102	nitric oxide synthase 1 (neuronal) [Source:NCBI gene;Acc:60658]
ENSDARG00000035732	arntl1b	201.255	1.00502	0.292431	3.43679	0.000588656	0.00919882	aryl hydrocarbon receptor nuclear translocator-like 1b [Source:ZFIN;Acc:ZDB-GENE-030408-1]
ENSDARG00000077583	b4gat1	81.9072	1.31695	0.38334	3.43546	0.000591558	0.00922244	beta-1,4-glucuronyltransferase 1 [Source:NCBI gene;Acc:101669768]
ENSDARG00000037968	fus	1159.8	0.746389	0.217356	3.43395	0.000594858	0.0092532	FUS RNA binding protein [Source:ZFIN;Acc:ZDB-GENE-040426-1010]
ENSDARG00000025855	camk2n1a	1485.18	1.45031	0.423545	3.42421	0.000616598	0.00951877	calcium/calmodulin-dependent protein kinase II inhibitor 1a [Source:ZFIN;Acc:ZDB-GENE-050522-319]
ENSDARG00000036811	ifrd2	511.002	0.632542	0.184805	3.42276	0.000619879	0.00955498	interferon-related developmental regulator 2 [Source:ZFIN;Acc:ZDB-GENE-040801-140]
ENSDARG00000098932	gigyf1a	277.278	0.806056	0.235579	3.42159	0.000622554	0.00958729	GRB10 interacting GYF protein 1a [Source:ZFIN;Acc:ZDB-GENE-050809-79]
ENSDARG00000059853	manbal	192.574	0.717112	0.209855	3.41718	0.000632732	0.00972367	mannosidase beta like [Source:ZFIN;Acc:ZDB-GENE-161222-1]
ENSDARG00000095157	zgc:163080	280.07	0.71377	0.208931	3.4163	0.000634791	0.00974063	zgc:163080 [Source:ZFIN;Acc:ZDB-GENE-070410-137]
ENSDARG00000070922	cnbpb	2661.54	0.711259	0.208257	3.41529	0.000637142	0.00976935	CCHC-type zinc finger, nucleic acid binding protein b [Source:ZFIN;Acc:ZDB-GENE-030131-7782]
ENSDARG00000068125	nfu1	389.919	0.594003	0.17394	3.41498	0.00063786	0.00976955	NFU1 iron-sulfur cluster scaffold homolog (S. cerevisiae) [Source:ZFIN;Acc:ZDB-GENE-050417-365]
ENSDARG00000105412	si:ch211-276i12.11	118.659	0.89334	0.261602	3.41487	0.000638113	0.00976955	si:ch211-276i12.11 [Source:ZFIN;Acc:ZDB-GENE-160628-5]
ENSDARG00000039299	rdh14a	140.916	1.18164	0.346243	3.41273	0.000643147	0.00983185	retinol dehydrogenase 14a [Source:ZFIN;Acc:ZDB-GENE-041010-124]
ENSDARG00000070704	thap7	156.748	0.833277	0.244213	3.41208	0.000644684	0.00984796	THAP domain containing 7 [Source:ZFIN;Acc:ZDB-GENE-040914-84]
ENSDARG00000033171	trappc6bl	126.661	0.795452	0.233571	3.40561	0.000660153	0.0100115	trafficking protein particle complex 6b-like [Source:ZFIN;Acc:ZDB-GENE-040426-1602]
ENSDARG00000071212	p3h1	91.2669	1.18374	0.34759	3.40556	0.000660295	0.0100115	prolyl 3-hydroxylase 1 [Source:ZFIN;Acc:ZDB-GENE-031010-35]
ENSDARG00000045737	guca1g	40.0189	2.45346	0.721074	3.40251	0.000667707	0.0101014	guanylate cyclase activator 1g [Source:ZFIN;Acc:ZDB-GENE-050120-1]
ENSDARG00000057334	cmasa	546.203	0.739989	0.217714	3.39891	0.000676543	0.0102112	cytidine monophosphate N-acetylneuraminic acid synthetase a [Source:NCBI gene;Acc:561018]
ENSDARG00000037655	pls3	1646.82	0.776883	0.22858	3.39874	0.000676974	0.0102112	plastin 3 (T isoform) [Source:ZFIN;Acc:ZDB-GENE-040718-10]
ENSDARG00000079881	tcaim	187.123	1.12931	0.332745	3.39393	0.000688982	0.0103693	T cell activation inhibitor, mitochondrial [Source:ZFIN;Acc:ZDB-GENE-160113-67]
ENSDARG00000042978	cyp2p6	1486.5	1.34356	0.39603	3.39257	0.000692414	0.0104133	cytochrome P450, family 2, subfamily P, polypeptide 6 [Source:ZFIN;Acc:ZDB-GENE-040426-790]
ENSDARG00000035136	selenow1	2299.1	0.659369	0.194416	3.39153	0.000695042	0.0104451	selenoprotein W, 1 [Source:NCBI gene;Acc:352915]
ENSDARG00000079766	tap1	306.688	0.876254	0.258534	3.38932	0.000700665	0.0105141	transporter 1, ATP-binding cassette, sub-family B (MDR/TAP) [Source:ZFIN;Acc:ZDB-GENE-050517-43]
ENSDARG00000094974	BX530068.1	205.403	2.62143	0.774072	3.38655	0.000707773	0.0105974	0
ENSDARG00000102551	jazf1a	36.0239	2.52408	0.746015	3.38342	0.000715892	0.0107007	JAZF zinc finger 1a [Source:ZFIN;Acc:ZDB-GENE-060503-492]
ENSDARG00000098208	fn3krp	60.6028	1.36105	0.403124	3.37625	0.000734806	0.010914	fructosamine 3 kinase related protein [Source:ZFIN;Acc:ZDB-GENE-041010-192]
ENSDARG00000097346	ten1	41.2971	1.19577	0.35452	3.37293	0.000743717	0.0110142	TEN1 subunit of CST complex [Source:ZFIN;Acc:ZDB-GENE-030131-8755]
ENSDARG00000094730	acbd7	828.164	1.00751	0.298774	3.37214	0.000745864	0.011038	acyl-CoA binding domain containing 7 [Source:ZFIN;Acc:ZDB-GENE-050913-108]
ENSDARG00000097019	dhrs13b.1	207.224	0.868695	0.258177	3.36472	0.000766212	0.0112656	dehydrogenase/reductase (SDR family) member 13b.1 [Source:ZFIN;Acc:ZDB-GENE-040801-253]
ENSDARG00000039130	cdkn3	92.5743	1.27097	0.377762	3.36446	0.000766925	0.0112679	cyclin-dependent kinase inhibitor 3 [Source:ZFIN;Acc:ZDB-GENE-060427-2]
ENSDARG00000004952	rsad2	156.35	2.57984	0.767904	3.35959	0.000780594	0.0114112	radical S-adenosyl methionine domain containing 2 [Source:NCBI gene;Acc:570456]
ENSDARG00000097341	CR847994.1	23.8687	1.26794	0.377473	3.35903	0.000782164	0.011421	0
ENSDARG00000097812	si:ch73-144d13.5	23.8542	1.91842	0.571202	3.35858	0.000783454	0.0114285	si:ch73-144d13.5 [Source:ZFIN;Acc:ZDB-GENE-131120-187]
ENSDARG00000096667	hemgn	603.583	1.28019	0.381419	3.35638	0.000789686	0.0114928	hemogen [Source:ZFIN;Acc:ZDB-GENE-121214-307]
ENSDARG00000058345	si:dkey-5i3.5	88.338	1.45887	0.434675	3.35623	0.000790121	0.0114928	si:dkey-5i3.5 [Source:ZFIN;Acc:ZDB-GENE-070424-162]
ENSDARG00000020606	nfe2	56.3565	1.60145	0.477497	3.35384	0.00079699	0.0115845	nuclear factor, erythroid 2 [Source:ZFIN;Acc:ZDB-GENE-030124-1]
ENSDARG00000005679	trip10a	353.971	0.821968	0.245262	3.35139	0.000804064	0.0116541	thyroid hormone receptor interactor 10a [Source:NCBI gene;Acc:492762]
ENSDARG00000042151	skia	902.262	0.944931	0.28253	3.34454	0.000824203	0.0118952	v-ski avian sarcoma viral oncogene homolog a [Source:ZFIN;Acc:ZDB-GENE-990715-9]
ENSDARG00000098852	smdt1b	746.761	0.615991	0.184307	3.34219	0.000831191	0.0119805	single-pass membrane protein with aspartate-rich tail 1b [Source:ZFIN;Acc:ZDB-GENE-141212-9]
ENSDARG00000074362	FUT9	423.782	1.1197	0.335079	3.3416	0.000832965	0.0119962	zgc:165582 [Source:ZFIN;Acc:ZDB-GENE-070820-9]
ENSDARG00000056226	creb3l3a	442.061	1.55045	0.465261	3.33244	0.000860889	0.0123114	cAMP responsive element binding protein 3-like 3a [Source:NCBI gene;Acc:553700]
ENSDARG00000063711	trim3a	381.811	0.669941	0.201133	3.33084	0.00086585	0.0123501	tripartite motif containing 3a [Source:ZFIN;Acc:ZDB-GENE-080522-4]
ENSDARG00000021220	hmgcl	711.168	0.648732	0.194949	3.3277	0.000875673	0.0124354	3-hydroxy-3-methylglutaryl-CoA lyase [Source:ZFIN;Acc:ZDB-GENE-040426-958]
ENSDARG00000107912	0	137.686	0.660788	0.198583	3.32751	0.000876262	0.0124354	FIG4 phosphoinositide 5-phosphatase a [Source:NCBI gene;Acc:100334605]
ENSDARG00000042188	ttc38	236.731	0.943948	0.283962	3.32421	0.000886695	0.0125747	tetratricopeptide repeat domain 38 [Source:NCBI gene;Acc:553728]
ENSDARG00000053987	htr1b	43.8469	2.09481	0.631862	3.31529	0.000915467	0.0129467	5-hydroxytryptamine (serotonin) receptor 1B [Source:ZFIN;Acc:ZDB-GENE-081022-141]
ENSDARG00000104203	ugt5b5	133.272	1.51884	0.458398	3.31337	0.000921784	0.013013	UDP glucuronosyltransferase 5 family, polypeptide B5 [Source:ZFIN;Acc:ZDB-GENE-160628-4]
ENSDARG00000070174	PLEKHH3	956.258	0.9791	0.295508	3.31328	0.000922074	0.013013	si:ch211-18i17.2 [Source:ZFIN;Acc:ZDB-GENE-030131-5404]
ENSDARG00000008920	mrpl53	124.444	0.719691	0.217527	3.30852	0.000937912	0.0131909	mitochondrial ribosomal protein L53 [Source:ZFIN;Acc:ZDB-GENE-040912-93]
ENSDARG00000017004	myo10	306.612	0.745604	0.225436	3.30739	0.000941691	0.0132287	myosin X [Source:ZFIN;Acc:ZDB-GENE-070912-277]
ENSDARG00000078731	si:dkey-85k7.12	409.756	1.47655	0.446448	3.30733	0.000941893	0.0132287	si:dkey-85k7.12 [Source:ZFIN;Acc:ZDB-GENE-130530-855]
ENSDARG00000100264	thumpd1	177.121	0.694233	0.210208	3.3026	0.000957927	0.0134298	THUMP domain containing 1 [Source:ZFIN;Acc:ZDB-GENE-040426-1805]
ENSDARG00000038784	faim2a	187.606	0.848934	0.257075	3.30228	0.000959027	0.0134298	Fas apoptotic inhibitory molecule 2a [Source:ZFIN;Acc:ZDB-GENE-050320-88]
ENSDARG00000062096	pm20d1.2	748.692	0.818886	0.248038	3.30145	0.000961878	0.013441	peptidase M20 domain containing 1, tandem duplicate 2 [Source:NCBI gene;Acc:768158]
ENSDARG00000045017	pdrg1	143.686	0.707649	0.21439	3.30075	0.000964263	0.0134502	p53 and DNA-damage regulated 1 [Source:ZFIN;Acc:ZDB-GENE-050417-276]
ENSDARG00000077737	spsb3a	341.108	0.841579	0.254986	3.30049	0.000965175	0.0134537	splA/ryanodine receptor domain and SOCS box containing 3a [Source:ZFIN;Acc:ZDB-GENE-030131-4182]
ENSDARG00000043518	si:dkey-239i20.2	1277.6	1.43198	0.434203	3.29795	0.00097395	0.0135483	si:dkey-239i20.2 [Source:ZFIN;Acc:ZDB-GENE-041001-98]
ENSDARG00000042620	gstr	6482.22	1.35209	0.410028	3.29756	0.0009753	0.0135578	glutathione S-transferase rho [Source:ZFIN;Acc:ZDB-GENE-090507-1]
ENSDARG00000099499	ndufa4l	4596.98	0.62605	0.189869	3.29727	0.000976308	0.0135626	NADH:ubiquinone oxidoreductase subunit A4, like [Source:ZFIN;Acc:ZDB-GENE-040426-2756]
ENSDARG00000099240	acap3b	182.507	1.01115	0.306833	3.29543	0.000982721	0.0136238	ArfGAP with coiled-coil, ankyrin repeat and PH domains 3b [Source:ZFIN;Acc:ZDB-GENE-070209-274]
ENSDARG00000076223	0	3747.51	0.723431	0.219576	3.29467	0.000985375	0.0136438	zgc:92744 [Source:ZFIN;Acc:ZDB-GENE-040718-312]
ENSDARG00000089878	nedd9	463.591	1.47569	0.447907	3.29463	0.000985504	0.0136438	neural precursor cell expressed, developmentally down-regulated 9 [Source:ZFIN;Acc:ZDB-GENE-061013-318]
ENSDARG00000112909	ZNF462	282.584	1.25854	0.382469	3.29057	0.000999864	0.0137983	zinc finger protein 462 [Source:HGNC Symbol;Acc:HGNC:21684]
ENSDARG00000010207	smad3b	145.391	0.714495	0.217138	3.29052	0.00100004	0.0137983	SMAD family member 3b [Source:ZFIN;Acc:ZDB-GENE-030128-4]
ENSDARG00000002249	tbxas1	557.597	1.05387	0.320347	3.28977	0.00100269	0.0138255	thromboxane A synthase 1 (platelet) [Source:ZFIN;Acc:ZDB-GENE-030131-8805]
ENSDARG00000045636	rbl2	319.812	0.860622	0.261708	3.28849	0.00100728	0.0138721	retinoblastoma-like 2 (p130) [Source:ZFIN;Acc:ZDB-GENE-061109-2]
ENSDARG00000097878	CU694532.1	6.25047	4.3873	1.33653	3.28262	0.00102848	NA	0
ENSDARG00000063908	mt-co2	134377	0.686893	0.209258	3.28251	0.00102887	0.0141101	cytochrome c oxidase subunit II [Source:NCBI gene;Acc:140540]
ENSDARG00000104841	JMJD8	497.162	0.819991	0.250069	3.27906	0.00104152	0.0142358	jumonji domain containing 8 [Source:NCBI gene;Acc:100330060]
ENSDARG00000092044	si:dkey-22f5.9	2888.69	2.06804	0.631044	3.27718	0.0010485	0.0143023	si:dkey-22f5.9 [Source:ZFIN;Acc:ZDB-GENE-091204-260]
ENSDARG00000012942	itgb5	357.983	0.610377	0.186347	3.27548	0.00105483	0.0143599	integrin, beta 5 [Source:ZFIN;Acc:ZDB-GENE-030131-6022]
ENSDARG00000008840	hmbsa	262.736	0.88695	0.270835	3.27488	0.00105708	0.014381	hydroxymethylbilane synthase a [Source:ZFIN;Acc:ZDB-GENE-040426-1375]
ENSDARG00000103811	agla	1379.29	1.09614	0.335016	3.27191	0.00106824	0.0145134	amylo-alpha-1, 6-glucosidase, 4-alpha-glucanotransferase a [Source:ZFIN;Acc:ZDB-GENE-071004-6]
ENSDARG00000013302	gpx8	60.3481	2.04248	0.624369	3.27127	0.00107065	0.0145268	glutathione peroxidase 8 (putative) [Source:NCBI gene;Acc:393191]
ENSDARG00000104856	C7H19orf12	86.4609	1.46013	0.446422	3.27073	0.0010727	0.014545	si:ch211-260e23.7 [Source:ZFIN;Acc:ZDB-GENE-141216-158]
ENSDARG00000023036	si:dkey-23a23.2	47.7646	1.89798	0.580647	3.26874	0.00108029	0.0146284	si:dkey-23a23.2 [Source:ZFIN;Acc:ZDB-GENE-060503-158]
ENSDARG00000077785	atf5b	2274.38	0.844523	0.258409	3.26817	0.00108245	0.0146382	activating transcription factor 5b [Source:ZFIN;Acc:ZDB-GENE-030131-2637]
ENSDARG00000025859	lmf2b	574.121	1.85074	0.566414	3.26746	0.00108516	0.0146457	lipase maturation factor 2b [Source:ZFIN;Acc:ZDB-GENE-070206-11]
ENSDARG00000110608	CABZ01115113.1	273.844	0.611707	0.187665	3.25956	0.00111584	0.0149903	proteasome (prosome, macropain) assembly chaperone 4 [Source:NCBI gene;Acc:100333944]
ENSDARG00000063375	pter	374.747	1.15309	0.354044	3.2569	0.00112634	0.0151215	phosphotriesterase related [Source:NCBI gene;Acc:751664]
ENSDARG00000103467	limk1a	202.209	0.854282	0.262512	3.25426	0.00113687	0.0151829	LIM domain kinase 1a [Source:ZFIN;Acc:ZDB-GENE-061212-3]
ENSDARG00000104897	si:dkey-16p6.1	31.2672	2.43218	0.748666	3.24869	0.00115938	0.0154329	si:dkey-16p6.1 [Source:ZFIN;Acc:ZDB-GENE-081103-43]
ENSDARG00000078729	ackr4a	70.2968	1.25101	0.385195	3.24773	0.00116331	0.0154651	atypical chemokine receptor 4a [Source:ZFIN;Acc:ZDB-GENE-070301-6]
ENSDARG00000062192	tbc1d8b	655.073	0.676594	0.208415	3.24637	0.00116886	0.0155186	TBC1 domain family member 8B [Source:NCBI gene;Acc:566657]
ENSDARG00000099614	purab	682.428	0.80702	0.248607	3.24616	0.00116971	0.0155198	purine-rich element binding protein Ab [Source:ZFIN;Acc:ZDB-GENE-141216-78]
ENSDARG00000036144	tssc4	407.549	0.586468	0.180858	3.24269	0.00118406	0.0156485	tumor suppressing subtransferable candidate 4 [Source:NCBI gene;Acc:559769]
ENSDARG00000056065	mov10b.2	226.945	0.83367	0.25711	3.24247	0.001185	0.0156485	Moloney leukemia virus 10b, tandem duplicate 2 [Source:NCBI gene;Acc:555950]
ENSDARG00000100409	camlg	292.995	0.671508	0.207314	3.23908	0.00119916	0.0157974	calcium modulating ligand [Source:ZFIN;Acc:ZDB-GENE-040426-2407]
ENSDARG00000071113	xirp2a	1140.96	0.839298	0.25914	3.23878	0.00120043	0.015804	xin actin binding repeat containing 2a [Source:ZFIN;Acc:ZDB-GENE-040108-7]
ENSDARG00000060368	syn1	1660.41	2.39968	0.742461	3.23207	0.00122898	0.0161382	synapsin I [Source:ZFIN;Acc:ZDB-GENE-081105-93]
ENSDARG00000077323	thap4	194.326	0.670252	0.207388	3.23188	0.0012298	0.0161386	THAP domain containing 4 [Source:ZFIN;Acc:ZDB-GENE-070912-5]
ENSDARG00000110545	CABZ01113373.1	336.365	0.824629	0.255382	3.229	0.00124223	0.016239	0
ENSDARG00000117508	CU459056.2	62.601	1.37924	0.427326	3.2276	0.00124834	0.0163083	0
ENSDARG00000101205	mbd1a	189.66	1.15559	0.358363	3.22462	0.0012614	0.0164474	methyl-CpG binding domain protein 1a [Source:ZFIN;Acc:ZDB-GENE-030131-4214]
ENSDARG00000005578	ugp2a	1079.73	1.05252	0.326503	3.22362	0.00126582	0.0164944	UDP-glucose pyrophosphorylase 2a [Source:ZFIN;Acc:ZDB-GENE-090311-46]
ENSDARG00000062222	mxra8a	236.394	1.45744	0.452569	3.22037	0.00128027	0.0166615	matrix-remodelling associated 8a [Source:ZFIN;Acc:ZDB-GENE-060503-671]
ENSDARG00000062752	mfap3l	897.471	0.603095	0.187312	3.21973	0.00128312	0.0166816	microfibril associated protein 3 like [Source:ZFIN;Acc:ZDB-GENE-111229-2]
ENSDARG00000078911	zgc:163098	360.091	0.658948	0.204676	3.21947	0.00128427	0.0166816	zgc:163098 [Source:ZFIN;Acc:ZDB-GENE-070410-141]
ENSDARG00000071076	ldhbb	10299.9	1.32781	0.413229	3.21325	0.00131241	0.0169796	lactate dehydrogenase Bb [Source:NCBI gene;Acc:436747]
ENSDARG00000067549	adamts12	23.3387	2.04446	0.636287	3.21311	0.00131304	0.0169796	ADAM metallopeptidase with thrombospondin type 1 motif, 12 [Source:ZFIN;Acc:ZDB-GENE-070705-471]
ENSDARG00000060010	iqgap2	1274.15	0.623638	0.194115	3.21273	0.0013148	0.0169916	IQ motif containing GTPase activating protein 2 [Source:ZFIN;Acc:ZDB-GENE-030131-2878]
ENSDARG00000025309	dpf3	66.7544	1.73664	0.540782	3.21135	0.00132113	0.017041	D4, zinc and double PHD fingers, family 3 [Source:NCBI gene;Acc:562738]
ENSDARG00000117321	CZQB01066256.1	15.0816	4.36159	1.35971	3.20772	0.0013379	0.017183	0
ENSDARG00000043180	gpd1b	5087.69	0.840835	0.262183	3.20706	0.00134099	0.0171993	glycerol-3-phosphate dehydrogenase 1b [Source:ZFIN;Acc:ZDB-GENE-030131-3906]
ENSDARG00000008808	eml2	846.086	0.818441	0.255302	3.20578	0.00134697	0.0172434	EMAP like 2 [Source:ZFIN;Acc:ZDB-GENE-050706-71]
ENSDARG00000100715	tlk1b	865.397	0.652608	0.203858	3.20128	0.00136818	0.0174711	tousled-like kinase 1b [Source:NCBI gene;Acc:326734]
ENSDARG00000069409	gkup	368.842	0.712496	0.222923	3.19616	0.0013927	0.0177444	glucuronokinase with putative uridyl pyrophosphorylase [Source:ZFIN;Acc:ZDB-GENE-080204-36]
ENSDARG00000036968	si:ch1073-416d2.3	2346.49	1.23081	0.385341	3.19407	0.00140283	0.0178576	si:ch1073-416d2.3 [Source:ZFIN;Acc:ZDB-GENE-131127-199]
ENSDARG00000039422	fuom	27.6947	1.0466	0.327692	3.19384	0.00140394	0.0178606	fucose mutarotase [Source:NCBI gene;Acc:447896]
ENSDARG00000069980	lman1	1541.94	0.595806	0.186708	3.19111	0.00141725	0.0179739	lectin, mannose-binding, 1 [Source:ZFIN;Acc:ZDB-GENE-060201-4]
ENSDARG00000057598	s100b	2910.66	2.314	0.725503	3.18951	0.00142516	0.0180405	S100 calcium binding protein, beta (neural) [Source:ZFIN;Acc:ZDB-GENE-040718-290]
ENSDARG00000061687	atxn1a	210.768	1.32752	0.416216	3.18951	0.00142516	0.0180405	ataxin 1a [Source:ZFIN;Acc:ZDB-GENE-060503-759]
ENSDARG00000030632	ccdc3b	55.2496	3.68033	1.1541	3.18892	0.00142805	0.0180659	coiled-coil domain containing 3b [Source:ZFIN;Acc:ZDB-GENE-050522-184]
ENSDARG00000029242	fbxo3	236.364	0.711003	0.223589	3.17996	0.00147296	0.0185879	F-box protein 3 [Source:ZFIN;Acc:ZDB-GENE-050522-269]
ENSDARG00000100513	rps27l	948.568	0.737738	0.232053	3.17918	0.00147691	0.0186263	ribosomal protein S27 like [Source:ZFIN;Acc:ZDB-GENE-060331-65]
ENSDARG00000089227	si:ch211-91p5.3	259.928	0.973837	0.3065	3.17728	0.00148662	0.0187256	si:ch211-91p5.3 [Source:ZFIN;Acc:ZDB-GENE-131119-65]
ENSDARG00000043210	nfic	77.522	1.01151	0.318799	3.17288	0.00150934	0.0189743	nuclear factor I/C [Source:ZFIN;Acc:ZDB-GENE-080305-2]
ENSDARG00000005172	dynll2b	414.27	1.00794	0.317688	3.17274	0.00151009	0.0189743	dynein, light chain, LC8-type 2b [Source:ZFIN;Acc:ZDB-GENE-050320-132]
ENSDARG00000038207	aldh4a1	851.338	0.95981	0.302554	3.17235	0.00151209	0.0189825	aldehyde dehydrogenase 4 family, member A1 [Source:NCBI gene;Acc:394133]
ENSDARG00000063414	rxylt1	142.095	0.642405	0.202508	3.17224	0.00151267	0.0189825	ribitol xylosyltransferase 1 [Source:NCBI gene;Acc:557187]
ENSDARG00000086158	ccbe1	64.69	1.02183	0.322372	3.16972	0.00152584	0.0191015	collagen and calcium binding EGF domains 1 [Source:NCBI gene;Acc:555629]
ENSDARG00000097238	hbba1	1122.4	2.03378	0.64209	3.16743	0.0015379	0.0192054	ba1 globin, like [Source:NCBI gene;Acc:504174]
ENSDARG00000089641	ppm1lb	104.374	2.1148	0.667888	3.1664	0.00154336	0.0192501	protein phosphatase, Mg2+/Mn2+ dependent, 1Lb [Source:ZFIN;Acc:ZDB-GENE-060929-136]
ENSDARG00000027461	mettl26	378.621	0.658919	0.208187	3.16503	0.00155069	0.0192942	methyltransferase like 26 [Source:NCBI gene;Acc:386899]
ENSDARG00000067567	SLC6A13	154.55	1.42561	0.450607	3.16375	0.0015575	0.0193553	solute carrier family 6 member 13 [Source:NCBI gene;Acc:100332592]
ENSDARG00000017590	nit2	240.127	0.947744	0.299786	3.16141	0.0015701	0.0194762	nitrilase family, member 2 [Source:NCBI gene;Acc:402904]
ENSDARG00000103937	ndrg4	5437.14	1.48319	0.469596	3.15843	0.00158622	0.0196524	NDRG family member 4 [Source:ZFIN;Acc:ZDB-GENE-060512-226]
ENSDARG00000104660	si:ch73-132f6.5	254.726	1.00557	0.318582	3.1564	0.00159729	0.0197655	si:ch73-132f6.5 [Source:ZFIN;Acc:ZDB-GENE-030131-9581]
ENSDARG00000013763	rrbp1a	2391.91	0.640217	0.202993	3.15389	0.00161108	0.019912	ribosome binding protein 1a [Source:ZFIN;Acc:ZDB-GENE-030131-9795]
ENSDARG00000055099	fam184b	346.24	2.36682	0.750721	3.15273	0.00161754	0.0199797	family with sequence similarity 184 member B [Source:ZFIN;Acc:ZDB-GENE-090313-380]
ENSDARG00000061918	cplx2	524.716	1.3411	0.425567	3.15133	0.0016253	0.0200271	complexin 2 [Source:ZFIN;Acc:ZDB-GENE-081113-1]
ENSDARG00000087636	hmgn6	1386.99	0.763996	0.242771	3.14698	0.00164967	0.0202241	high mobility group nucleosome binding domain 6 [Source:ZFIN;Acc:ZDB-GENE-030131-1005]
ENSDARG00000090679	si:ch211-79k12.2	142.838	0.848046	0.269531	3.14638	0.00165306	0.0202241	si:ch211-79k12.2 [Source:ZFIN;Acc:ZDB-GENE-131121-535]
ENSDARG00000055550	casp21	184.567	1.13961	0.362261	3.14583	0.00165617	0.0202241	caspase 21, apoptosis-related cysteine peptidase [Source:ZFIN;Acc:ZDB-GENE-190425-1]
ENSDARG00000045542	lamtor4	315.188	0.601615	0.191396	3.14331	0.00167051	0.020387	late endosomal/lysosomal adaptor, MAPK and MTOR activator 4 [Source:NCBI gene;Acc:561019]
ENSDARG00000013804	capns1b	1501	0.657686	0.209271	3.14275	0.0016737	0.0204138	calpain, small subunit 1 b [Source:ZFIN;Acc:ZDB-GENE-030131-5206]
ENSDARG00000058775	44836	115.143	1.13887	0.363124	3.13631	0.00171085	0.0207305	organic cation transporter 2 [Source:ZFIN;Acc:ZDB-GENE-080204-92]
ENSDARG00000036791	dnmt3bb.1	169.207	1.13297	0.361468	3.13437	0.00172223	0.0208188	DNA (cytosine-5-)-methyltransferase 3 beta, duplicate b.1 [Source:ZFIN;Acc:ZDB-GENE-050314-1]
ENSDARG00000039041	sfrp5	71.7144	1.26602	0.404012	3.13362	0.00172663	0.020835	secreted frizzled-related protein 5 [Source:ZFIN;Acc:ZDB-GENE-011108-2]
ENSDARG00000041400	ndufa3	751.992	0.596023	0.190245	3.13292	0.00173078	0.0208616	NADH:ubiquinone oxidoreductase subunit A3 [Source:ZFIN;Acc:ZDB-GENE-040801-18]
ENSDARG00000004211	ccdc106a	528.106	1.00886	0.322022	3.1329	0.00173088	0.0208616	coiled-coil domain containing 106a [Source:ZFIN;Acc:ZDB-GENE-050220-4]
ENSDARG00000087186	si:ch211-232b12.5	652.707	0.926442	0.295822	3.13175	0.00173767	0.0209311	si:ch211-232b12.5 [Source:ZFIN;Acc:ZDB-GENE-031002-40]
ENSDARG00000052903	rtkn2b	74.5997	0.847822	0.270898	3.12967	0.00175002	0.0210426	rhotekin 2b [Source:ZFIN;Acc:ZDB-GENE-040912-64]
ENSDARG00000017154	cables2b	48.5727	1.42483	0.455314	3.12933	0.00175202	0.0210454	Cdk5 and Abl enzyme substrate 2b [Source:ZFIN;Acc:ZDB-GENE-090313-249]
ENSDARG00000101322	tfr1a	87.3314	1.91311	0.611775	3.12714	0.00176514	0.0211513	transferrin receptor 1a [Source:ZFIN;Acc:ZDB-GENE-041220-1]
ENSDARG00000094388	celsr2	18.2252	3.98048	1.27381	3.12485	0.00177894	0.0212649	cadherin, EGF LAG seven-pass G-type receptor 2 [Source:ZFIN;Acc:ZDB-GENE-070122-2]
ENSDARG00000038668	gbp1	811.111	1.14272	0.365729	3.1245	0.00178108	0.021278	guanylate binding protein 1 [Source:ZFIN;Acc:ZDB-GENE-040718-32]
ENSDARG00000059020	thap1	78.4628	0.902634	0.289251	3.12059	0.00180487	0.0215119	THAP domain containing, apoptosis associated protein 1 [Source:NCBI gene;Acc:692315]
ENSDARG00000099221	ppp2r2bb	181.687	1.28705	0.412666	3.11887	0.00181548	0.0216004	protein phosphatase 2, regulatory subunit B, beta b [Source:ZFIN;Acc:ZDB-GENE-041010-39]
ENSDARG00000074750	qser1	319.602	0.772697	0.248062	3.11493	0.00183989	0.0218399	glutamine and serine rich 1 [Source:ZFIN;Acc:ZDB-GENE-030131-2978]
ENSDARG00000076025	dgkzb	484.301	1.09899	0.35309	3.11249	0.00185514	0.0219952	diacylglycerol kinase, zeta b [Source:ZFIN;Acc:ZDB-GENE-111104-4]
ENSDARG00000013024	erap1a	405.313	0.657657	0.211567	3.10851	0.00188032	0.0222421	endoplasmic reticulum aminopeptidase 1a [Source:ZFIN;Acc:ZDB-GENE-091113-7]
ENSDARG00000099376	CABZ01050249.1	146.327	0.746304	0.240132	3.10788	0.00188432	0.0222677	cathepsin Z-like [Source:NCBI gene;Acc:100333521]
ENSDARG00000089661	FO704622.1	132.561	0.840127	0.270341	3.10766	0.00188576	0.0222677	interferon-induced protein 44-like [Source:NCBI gene;Acc:100538089]
ENSDARG00000031981	pcbd1	188.178	1.00117	0.322289	3.10644	0.00189357	0.0223416	pterin-4 alpha-carbinolamine dehydratase/dimerization cofactor of hepatocyte nuclear factor 1 alpha [Source:ZFIN;Acc:ZDB-GENE-040426-1787]
ENSDARG00000061201	acsf2	1861.6	1.43291	0.461883	3.10232	0.00192012	0.0225818	acyl-CoA synthetase family member 2 [Source:NCBI gene;Acc:751707]
ENSDARG00000045749	ppfibp1a	143.169	0.88308	0.284697	3.10182	0.00192335	0.0226068	PPFIA binding protein 1a [Source:ZFIN;Acc:ZDB-GENE-041210-298]
ENSDARG00000077906	rnf165a	171.262	1.06943	0.345049	3.09935	0.00193944	0.0227436	ring finger protein 165a [Source:ZFIN;Acc:ZDB-GENE-091118-64]
ENSDARG00000016074	cryz	684.636	0.699825	0.225866	3.0984	0.00194567	0.0228035	crystallin, zeta (quinone reductase) [Source:ZFIN;Acc:ZDB-GENE-050306-24]
ENSDARG00000069335	bcl6b	80.8632	0.870568	0.281452	3.09313	0.00198058	0.023077	BCL6B transcription repressor [Source:ZFIN;Acc:ZDB-GENE-120907-1]
ENSDARG00000090930	si:ch211-120g10.1	259.618	1.73163	0.559842	3.09307	0.00198097	0.023077	si:ch211-120g10.1 [Source:ZFIN;Acc:ZDB-GENE-130531-56]
ENSDARG00000062477	kiaa1549la	1047.56	1.55432	0.503175	3.08904	0.00200807	0.0233071	KIAA1549-like a [Source:ZFIN;Acc:ZDB-GENE-061207-55]
ENSDARG00000059722	ubac1	443.99	0.937181	0.303752	3.08535	0.0020331	0.0235574	UBA domain containing 1 [Source:ZFIN;Acc:ZDB-GENE-030131-9372]
ENSDARG00000074346	l3mbtl1b	134.337	1.0736	0.348076	3.08439	0.00203971	0.0236201	L3MBTL histone methyl-lysine binding protein 1b [Source:ZFIN;Acc:ZDB-GENE-100922-38]
ENSDARG00000008155	sms	550.667	0.988582	0.320588	3.08366	0.00204473	0.0236517	spermine synthase [Source:ZFIN;Acc:ZDB-GENE-040625-150]
ENSDARG00000035540	brwd3	305.559	0.806038	0.261419	3.08332	0.00204704	0.0236517	bromodomain and WD repeat domain containing 3 [Source:ZFIN;Acc:ZDB-GENE-100921-43]
ENSDARG00000102025	znf644b	256.728	0.617676	0.200438	3.08163	0.00205874	0.0237511	zinc finger protein 644b [Source:ZFIN;Acc:ZDB-GENE-120214-23]
ENSDARG00000031915	hif1an	629.985	0.649574	0.210821	3.08116	0.00206194	0.0237511	hypoxia inducible factor 1 subunit alpha inhibitor [Source:NCBI gene;Acc:373126]
ENSDARG00000036482	hexim1	1067.39	0.63003	0.204479	3.08114	0.00206209	0.0237511	HEXIM P-TEFb complex subunit 1 [Source:NCBI gene;Acc:562319]
ENSDARG00000029720	si:dkeyp-9d4.2	958.643	1.40918	0.457456	3.08046	0.00206682	0.0237859	si:dkeyp-9d4.2 [Source:ZFIN;Acc:ZDB-GENE-090312-156]
ENSDARG00000104730	si:dkey-33b17.3	28.6192	2.92491	0.951006	3.0756	0.00210079	0.0240334	si:dkey-33b17.3 [Source:ZFIN;Acc:ZDB-GENE-030616-171]
ENSDARG00000103480	BX640512.3	416.821	1.25695	0.408765	3.075	0.00210505	0.024063	C-type lectin domain family 4 member K-like [Source:NCBI gene;Acc:101886537]
ENSDARG00000099175	hmgb1a	4009.6	0.934218	0.303968	3.0734	0.00211632	0.0241647	high mobility group box 1a [Source:ZFIN;Acc:ZDB-GENE-030131-341]
ENSDARG00000008457	faah2a	832.366	0.782217	0.254577	3.07261	0.00212194	0.0242153	fatty acid amide hydrolase 2a [Source:NCBI gene;Acc:436973]
ENSDARG00000004427	dpy30	343.334	0.727181	0.236913	3.0694	0.00214488	0.0244497	dpy-30 histone methyltransferase complex regulatory subunit [Source:ZFIN;Acc:ZDB-GENE-040718-136]
ENSDARG00000038076	romo1	2121.68	0.655827	0.213847	3.0668	0.00216361	0.024622	reactive oxygen species modulator 1 [Source:NCBI gene;Acc:393770]
ENSDARG00000025350	prdx2	4467.07	0.796751	0.259905	3.06555	0.00217271	0.0246769	peroxiredoxin 2 [Source:ZFIN;Acc:ZDB-GENE-030326-2]
ENSDARG00000103614	pemt	106.038	0.898546	0.293115	3.06551	0.002173	0.0246769	phosphatidylethanolamine N-methyltransferase [Source:ZFIN;Acc:ZDB-GENE-040426-719]
ENSDARG00000037884	rab30	105.267	1.55634	0.507699	3.06547	0.00217328	0.0246769	RAB30, member RAS oncogene family [Source:ZFIN;Acc:ZDB-GENE-040718-250]
ENSDARG00000074712	si:ch211-186e20.2	1949.09	2.34051	0.764283	3.06235	0.00219604	0.0248661	si:ch211-186e20.2 [Source:ZFIN;Acc:ZDB-GENE-110407-8]
ENSDARG00000077193	nags	12.0057	3.83341	1.25237	3.06092	0.00220661	NA	N-acetylglutamate synthase [Source:NCBI gene;Acc:557716]
ENSDARG00000055159	cyp27a1.4	173.128	1.12246	0.367058	3.058	0.00222822	0.0251467	cytochrome P450, family 27, subfamily A, polypeptide 1, gene 4 [Source:ZFIN;Acc:ZDB-GENE-030131-1060]
ENSDARG00000114237	bcl2l16	54.5432	1.55256	0.508064	3.05584	0.0022443	0.0253002	BCL2 like 16 [Source:ZFIN;Acc:ZDB-GENE-140619-1]
ENSDARG00000097503	si:ch73-288o11.5	224.78	0.900591	0.294777	3.05516	0.0022494	0.0253417	si:ch73-288o11.5 [Source:ZFIN;Acc:ZDB-GENE-131121-416]
ENSDARG00000020279	efcab7	133.462	0.822074	0.269231	3.05342	0.00226252	0.0254633	EF-hand calcium binding domain 7 [Source:ZFIN;Acc:ZDB-GENE-040625-115]
ENSDARG00000054588	cox6a2	2591.23	1.02632	0.336285	3.05194	0.00227367	0.0255606	cytochrome c oxidase subunit 6A2 [Source:ZFIN;Acc:ZDB-GENE-040912-129]
ENSDARG00000011463	CABZ01044048.1	181.504	1.17809	0.386229	3.05023	0.00228664	0.0256781	coagulation factor IX-like [Source:NCBI gene;Acc:100004411]
ENSDARG00000059738	ptprsa	445.42	1.74558	0.573457	3.04396	0.00233487	0.0260905	protein tyrosine phosphatase receptor type Sa [Source:ZFIN;Acc:ZDB-GENE-020107-3]
ENSDARG00000079738	znf219	300.738	0.861727	0.283141	3.04346	0.00233875	0.0261194	zinc finger protein 219 [Source:NCBI gene;Acc:102997060]
ENSDARG00000023820	faxdc2	4185.11	0.964879	0.317173	3.04212	0.00234915	0.0261925	fatty acid hydroxylase domain containing 2 [Source:ZFIN;Acc:ZDB-GENE-040426-2907]
ENSDARG00000039892	gnpnat1	490.796	0.654897	0.215327	3.04141	0.0023547	0.0262401	glucosamine-phosphate N-acetyltransferase 1 [Source:ZFIN;Acc:ZDB-GENE-050522-450]
ENSDARG00000019260	dhrs9	3334.7	0.773077	0.254338	3.03956	0.00236922	0.0263875	dehydrogenase/reductase (SDR family) member 9 [Source:ZFIN;Acc:ZDB-GENE-030131-1249]
ENSDARG00000056026	tprg1	553.042	0.838822	0.276138	3.0377	0.00238394	0.0265273	tumor protein p63 regulated 1 [Source:ZFIN;Acc:ZDB-GENE-070410-113]
ENSDARG00000010873	DDX17	1407.98	0.769997	0.253511	3.03733	0.0023868	0.0265398	si:dkey-156n14.5 [Source:ZFIN;Acc:ZDB-GENE-030131-18]
ENSDARG00000029587	msra	377.15	0.903907	0.297646	3.03685	0.00239066	0.0265682	methionine sulfoxide reductase A [Source:ZFIN;Acc:ZDB-GENE-041014-344]
ENSDARG00000045754	mettl25	86.0806	1.03569	0.341134	3.03601	0.00239732	0.0266133	methyltransferase like 25 [Source:ZFIN;Acc:ZDB-GENE-041210-90]
ENSDARG00000060925	jarid2a	242.315	0.917248	0.302189	3.03535	0.00240257	0.0266571	jumonji, AT rich interactive domain 2a [Source:ZFIN;Acc:ZDB-GENE-061218-1]
ENSDARG00000079455	nlgn4xa	273.928	3.17059	1.04472	3.03488	0.00240634	0.0266843	neuroligin 4 X-linked a [Source:ZFIN;Acc:ZDB-GENE-100309-2]
ENSDARG00000056252	sort1b	841.318	0.734486	0.242064	3.03426	0.00241129	0.0267206	sortilin 1b [Source:ZFIN;Acc:ZDB-GENE-030131-7447]
ENSDARG00000101037	asf1ba	74.044	1.68734	0.556117	3.03414	0.00241223	0.0267206	anti-silencing function 1Ba histone chaperone [Source:NCBI gene;Acc:386897]
ENSDARG00000018966	cyb5r1	440.622	1.08633	0.358064	3.03391	0.00241408	0.0267266	cytochrome b5 reductase 1 [Source:ZFIN;Acc:ZDB-GENE-030131-8497]
ENSDARG00000105433	zgc:172143	5.3999	4.65337	1.53458	3.03235	0.00242658	NA	zgc:172143 [Source:ZFIN;Acc:ZDB-GENE-080219-22]
ENSDARG00000014806	hacd2	1694.16	1.00134	0.330222	3.03231	0.00242687	0.0268245	3-hydroxyacyl-CoA dehydratase 2 [Source:ZFIN;Acc:ZDB-GENE-030131-6053]
ENSDARG00000060687	chd2	974.793	0.799798	0.263857	3.03118	0.00243603	0.0269112	chromodomain helicase DNA binding protein 2 [Source:ZFIN;Acc:ZDB-GENE-050419-256]
ENSDARG00000011122	pptc7a	1545.33	1.69207	0.55868	3.02869	0.00245619	0.0270711	PTC7 protein phosphatase homolog a [Source:NCBI gene;Acc:492506]
ENSDARG00000037324	klhl17	505.881	1.01704	0.33612	3.02581	0.00247967	0.0272852	kelch-like family member 17 [Source:ZFIN;Acc:ZDB-GENE-030131-8131]
ENSDARG00000117256	BX640522.2	54.9194	3.31136	1.09441	3.0257	0.00248059	0.0272852	0
ENSDARG00000095113	btr04	48.8497	2.00297	0.662963	3.02124	0.0025174	0.0275415	bloodthirsty-related gene family, member 4 [Source:ZFIN;Acc:ZDB-GENE-060825-109]
ENSDARG00000038910	pccb	813.591	0.603311	0.19981	3.01943	0.00253252	0.0276623	propionyl-CoA carboxylase subunit beta [Source:ZFIN;Acc:ZDB-GENE-040426-2467]
ENSDARG00000086740	phyh	3562.38	1.15122	0.381474	3.01783	0.00254595	0.0277675	phytanoyl-CoA 2-hydroxylase [Source:ZFIN;Acc:ZDB-GENE-050417-361]
ENSDARG00000102877	bphl	181.887	0.614004	0.203694	3.01434	0.00257535	0.0280402	biphenyl hydrolase like [Source:ZFIN;Acc:ZDB-GENE-170623-2]
ENSDARG00000117329	CABZ01113815.1	341.671	0.712857	0.23662	3.01267	0.0025896	0.0281652	0
ENSDARG00000054562	her15.1	29.2772	1.27886	0.425694	3.00417	0.00266305	0.0287799	hairy and enhancer of split-related 15, tandem duplicate 1 [Source:ZFIN;Acc:ZDB-GENE-030707-2]
ENSDARG00000040027	osbpl10b	209.258	1.20624	0.401782	3.00222	0.00268019	0.028898	oxysterol binding protein-like 10b [Source:ZFIN;Acc:ZDB-GENE-081002-4]
ENSDARG00000078551	zgc:171242	20.675	2.63538	0.87807	3.00134	0.00268799	0.0289573	zgc:171242 [Source:ZFIN;Acc:ZDB-GENE-071004-79]
ENSDARG00000020618	gatd3a	425.611	0.916985	0.305683	2.99979	0.00270164	0.0290736	glutamine amidotransferase like class 1 domain containing 3A [Source:NCBI gene;Acc:550355]
ENSDARG00000031680	ercc1	106.75	0.910885	0.303889	2.99742	0.00272271	0.0292233	excision repair cross-complementation group 1 [Source:ZFIN;Acc:ZDB-GENE-040426-2606]
ENSDARG00000078238	nacc1b	35.1641	1.79758	0.600083	2.99556	0.00273942	0.0293717	nucleus accumbens associated 1, BEN and BTB (POZ) domain containing b [Source:ZFIN;Acc:ZDB-GENE-121212-1]
ENSDARG00000113274	AL929536.3	58.3959	2.42595	0.810492	2.99318	0.00276088	0.0295087	0
ENSDARG00000063914	mt-nd3	9741.18	0.815245	0.272421	2.9926	0.00276616	0.0295496	NADH dehydrogenase subunit 3 [Source:NCBI gene;Acc:140533]
ENSDARG00000086107	MTERF1	88.8496	0.975532	0.32635	2.98922	0.00279687	0.0297328	mitochondrial transcription termination factor 1 [Source:NCBI gene;Acc:100536997]
ENSDARG00000076308	pdp1	151.44	1.57741	0.528289	2.98588	0.00282762	0.0299863	pyruvate dehyrogenase phosphatase catalytic subunit 1 [Source:ZFIN;Acc:ZDB-GENE-060810-70]
ENSDARG00000007289	metrnlb	50.5061	1.97552	0.661857	2.98482	0.00283744	0.0300543	meteorin like, glial cell differentiation regulator b [Source:ZFIN;Acc:ZDB-GENE-121214-223]
ENSDARG00000037894	ezh1	706.633	0.920507	0.308813	2.98079	0.00287502	0.0303089	enhancer of zeste 1 polycomb repressive complex 2 subunit [Source:ZFIN;Acc:ZDB-GENE-050114-1]
ENSDARG00000006889	mpped2a	205.214	1.01417	0.340364	2.97965	0.00288581	0.0303822	metallophosphoesterase domain containing 2a [Source:ZFIN;Acc:ZDB-GENE-050417-241]
ENSDARG00000074468	prdm11	183.614	0.661859	0.222149	2.97935	0.00288858	0.0303957	PR domain containing 11 [Source:ZFIN;Acc:ZDB-GENE-061221-1]
ENSDARG00000004308	fam8a1b	184.586	0.598157	0.200893	2.97749	0.00290619	0.0305495	family with sequence similarity 8 member A1b [Source:ZFIN;Acc:ZDB-GENE-050410-14]
ENSDARG00000007678	ttyh3b	2777.13	0.785708	0.264057	2.97553	0.00292487	0.0306983	tweety family member 3b [Source:NCBI gene;Acc:798421]
ENSDARG00000053646	adrb3a	12.3688	3.52281	1.18405	2.97522	0.00292776	NA	adrenoceptor beta 3a [Source:ZFIN;Acc:ZDB-GENE-080917-21]
ENSDARG00000079078	si:ch211-5k11.8	2620.82	2.16936	0.72946	2.97393	0.00294012	0.0308098	si:ch211-5k11.8 [Source:ZFIN;Acc:ZDB-GENE-131121-640]
ENSDARG00000094345	si:dkey-261l7.2	886.31	1.02722	0.345425	2.97378	0.00294153	0.0308098	si:dkey-261l7.2 [Source:ZFIN;Acc:ZDB-GENE-090313-288]
ENSDARG00000102878	mapre3b	671.851	0.701953	0.236112	2.97296	0.0029494	0.0308447	microtubule-associated protein, RP/EB family, member 3b [Source:ZFIN;Acc:ZDB-GENE-040704-6]
ENSDARG00000037403	hspa8b	466.361	2.16522	0.72928	2.96898	0.00298789	0.0311832	heat shock protein family A (Hsp70) member 8b [Source:ZFIN;Acc:ZDB-GENE-121214-31]
ENSDARG00000094857	dio2	4071.33	1.48703	0.501263	2.96658	0.00301136	0.0314121	iodothyronine deiodinase 2 [Source:ZFIN;Acc:ZDB-GENE-030327-4]
ENSDARG00000099943	mapre2	620.889	0.596437	0.201081	2.96616	0.00301548	0.031423	microtubule-associated protein, RP/EB family, member 2 [Source:ZFIN;Acc:ZDB-GENE-071004-41]
ENSDARG00000098600	pithd1	67.0829	0.693886	0.234279	2.96179	0.00305853	0.0318037	PITH (C-terminal proteasome-interacting domain of thioredoxin-like) domain containing 1 [Source:NCBI gene;Acc:404606]
ENSDARG00000098350	mxd3	74.597	1.43352	0.48411	2.96115	0.00306488	0.0318401	MAX dimerization protein 3 [Source:NCBI gene;Acc:394031]
ENSDARG00000058366	si:dkey-222f8.3	335.888	0.704855	0.238249	2.95848	0.00309155	0.0320682	si:dkey-222f8.3 [Source:ZFIN;Acc:ZDB-GENE-030131-3658]
ENSDARG00000076020	pappa2	122.415	1.51918	0.51355	2.9582	0.00309444	0.0320818	pappalysin 2 [Source:ZFIN;Acc:ZDB-GENE-070912-525]
ENSDARG00000079124	MTERF4	68.6289	0.802554	0.271523	2.95575	0.00311913	0.0323018	si:dkeyp-94h10.5 [Source:ZFIN;Acc:ZDB-GENE-070912-693]
ENSDARG00000093960	si:dkey-111e8.5	142.443	0.838521	0.283708	2.95558	0.00312082	0.0323018	si:dkey-111e8.5 [Source:ZFIN;Acc:ZDB-GENE-060526-192]
ENSDARG00000051823	hyal4	32.6405	3.41132	1.15424	2.95546	0.00312199	0.0323018	hyaluronidase 4 [Source:ZFIN;Acc:ZDB-GENE-061220-9]
ENSDARG00000036375	cyfip2	1010.59	1.15156	0.389762	2.95451	0.00313164	0.0323523	cytoplasmic FMR1 interacting protein 2 [Source:ZFIN;Acc:ZDB-GENE-080724-2]
ENSDARG00000037000	fkbp11	253.078	0.971126	0.328739	2.95409	0.0031359	0.0323799	FKBP prolyl isomerase 11 [Source:ZFIN;Acc:ZDB-GENE-030616-357]
ENSDARG00000098881	si:dkey-238i5.3	5.19236	5.05421	1.7112	2.9536	0.00314088	NA	si:dkey-238i5.3 [Source:ZFIN;Acc:ZDB-GENE-141222-86]
ENSDARG00000023058	foxo3a	670.053	1.52134	0.515102	2.95347	0.0031422	0.0324285	forkhead box O3A [Source:ZFIN;Acc:ZDB-GENE-050116-1]
ENSDARG00000016687	acadvl	3772.33	0.932437	0.315744	2.95314	0.00314558	0.032447	acyl-CoA dehydrogenase very long chain [Source:ZFIN;Acc:ZDB-GENE-030131-899]
ENSDARG00000096415	raf1a	89.2786	0.629581	0.213399	2.95025	0.00317516	0.0326861	Raf-1 proto-oncogene, serine/threonine kinase a [Source:ZFIN;Acc:ZDB-GENE-990415-41]
ENSDARG00000101631	etfa	2636.95	0.607276	0.206252	2.94433	0.0032365	0.0331502	electron transfer flavoprotein subunit alpha [Source:ZFIN;Acc:ZDB-GENE-030131-4449]
ENSDARG00000097205	ulk2	1828.13	1.45979	0.496014	2.94304	0.00325002	0.033224	unc-51 like autophagy activating kinase 2 [Source:ZFIN;Acc:ZDB-GENE-090218-30]
ENSDARG00000071336	mif	553.57	0.833234	0.283568	2.93839	0.0032992	0.0336067	macrophage migration inhibitory factor [Source:ZFIN;Acc:ZDB-GENE-080708-1]
ENSDARG00000038300	rnf34a	175.484	0.975129	0.331907	2.93795	0.00330385	0.0336272	ring finger protein 34a [Source:ZFIN;Acc:ZDB-GENE-030131-6135]
ENSDARG00000101778	ca5a	973.544	1.62537	0.55332	2.93748	0.00330894	0.0336555	carbonic anhydrase Va [Source:ZFIN;Acc:ZDB-GENE-080220-57]
ENSDARG00000057942	glt8d2	65.0562	1.39891	0.476771	2.93413	0.00334486	0.0339193	glycosyltransferase 8 domain containing 2 [Source:ZFIN;Acc:ZDB-GENE-041210-98]
ENSDARG00000028088	galk1	204.643	0.895364	0.305327	2.93247	0.00336275	0.0340162	galactokinase 1 [Source:ZFIN;Acc:ZDB-GENE-041010-79]
ENSDARG00000035970	ptprn2	1640.66	4.01445	1.3704	2.9294	0.00339614	0.034252	protein tyrosine phosphatase receptor type N2 [Source:ZFIN;Acc:ZDB-GENE-030131-3758]
ENSDARG00000094004	FP102120.1	51.506	1.27305	0.434943	2.92694	0.00342315	0.0344392	0
ENSDARG00000069956	pdlim2	605.694	1.08946	0.372318	2.92615	0.0034318	0.0344804	PDZ and LIM domain 2 (mystique) [Source:ZFIN;Acc:ZDB-GENE-070308-4]
ENSDARG00000092170	apoc1	109228	1.36502	0.466687	2.9249	0.00344564	0.0345972	apolipoprotein C-I [Source:ZFIN;Acc:ZDB-GENE-030131-1074]
ENSDARG00000031768	roraa	513.668	0.982398	0.335942	2.92431	0.00345224	0.0346294	RAR-related orphan receptor A, paralog a [Source:NCBI gene;Acc:564951]
ENSDARG00000076595	sema4ga	130.283	1.07194	0.366632	2.92376	0.00345832	0.0346734	sema domain, immunoglobulin domain (Ig), transmembrane domain (TM) and short cytoplasmic domain, (semaphorin) 4Ga [Source:ZFIN;Acc:ZDB-GENE-060503-381]
ENSDARG00000101421	si:dkeyp-80d11.10	60.2697	1.45255	0.49725	2.92117	0.00348722	0.0348823	si:dkeyp-80d11.10 [Source:ZFIN;Acc:ZDB-GENE-070424-271]
ENSDARG00000029874	khk	497.877	1.64635	0.563601	2.92112	0.00348771	0.0348823	ketohexokinase [Source:ZFIN;Acc:ZDB-GENE-040718-381]
ENSDARG00000005284	fbxl15	111.579	0.832792	0.285221	2.91982	0.00350237	0.0350117	F-box and leucine-rich repeat protein 15 [Source:NCBI gene;Acc:405878]
ENSDARG00000102291	eef1da	6855.93	0.74837	0.256323	2.91964	0.00350441	0.0350149	eukaryotic translation elongation factor 1 delta a (guanine nucleotide exchange protein) [Source:ZFIN;Acc:ZDB-GENE-040426-2740]
ENSDARG00000042090	si:ch73-55i23.1	104.421	1.92976	0.660999	2.91945	0.00350648	0.0350185	si:ch73-55i23.1 [Source:NCBI gene;Acc:100148818]
ENSDARG00000020475	znrf1	458.063	0.87742	0.300624	2.91867	0.00351531	0.0350894	zinc and ring finger 1 [Source:NCBI gene;Acc:393844]
ENSDARG00000033009	h3f3c	2659.51	0.984821	0.337798	2.91541	0.00355217	0.0353536	H3 histone, family 3C [Source:ZFIN;Acc:ZDB-GENE-030131-8175]
ENSDARG00000075021	fam120a	1463.84	0.586966	0.201414	2.91423	0.00356564	0.035453	family with sequence similarity 120A [Source:ZFIN;Acc:ZDB-GENE-110131-10]
ENSDARG00000055498	si:ch1073-184j22.1	53.8467	1.14684	0.39358	2.91387	0.00356978	0.0354768	si:ch1073-184j22.1 [Source:ZFIN;Acc:ZDB-GENE-081104-74]
ENSDARG00000099560	lyrm5a	187.552	0.817783	0.280929	2.91099	0.00360281	0.0357355	LYR motif containing 5a [Source:NCBI gene;Acc:553589]
ENSDARG00000104732	mlycd	135.795	0.664928	0.228603	2.90866	0.00362977	0.0359155	malonyl-CoA decarboxylase [Source:ZFIN;Acc:ZDB-GENE-070410-120]
ENSDARG00000068296	SLCO3A1	453.695	2.65039	0.911512	2.90769	0.00364111	0.035958	si:dkey-88i8.2 [Source:NCBI gene;Acc:570448]
ENSDARG00000075151	si:dkey-188i13.10	392.043	1.15135	0.396126	2.90653	0.00365464	0.0360741	si:dkey-188i13.10 [Source:ZFIN;Acc:ZDB-GENE-090313-208]
ENSDARG00000074564	tlcd3bb	124.866	1.40852	0.484748	2.90568	0.00366459	0.0361198	TLC domain containing 3Bb [Source:ZFIN;Acc:ZDB-GENE-110603-2]
ENSDARG00000099079	aclya	3653.29	1.17444	0.404557	2.90302	0.0036958	0.0363047	ATP citrate lyase a [Source:ZFIN;Acc:ZDB-GENE-031113-1]
ENSDARG00000061830	prss12	215.261	3.23664	1.11518	2.90236	0.00370367	0.0363644	serine protease 12 [Source:ZFIN;Acc:ZDB-GENE-090313-45]
ENSDARG00000030786	mpi	124.003	0.608664	0.209817	2.90093	0.00372052	0.0364717	mannose phosphate isomerase [Source:ZFIN;Acc:ZDB-GENE-050904-6]
ENSDARG00000037613	lgals8b	56.0075	3.95401	1.36431	2.89817	0.00375342	0.0367467	galectin 8b [Source:ZFIN;Acc:ZDB-GENE-120727-7]
ENSDARG00000016448	vtg3	11.9231	2.73114	0.942671	2.89724	0.00376464	NA	vitellogenin 3, phosvitinless [Source:ZFIN;Acc:ZDB-GENE-991019-2]
ENSDARG00000044387	cldn2	219.202	1.01692	0.351019	2.89705	0.00376693	0.0368106	claudin 2 [Source:ZFIN;Acc:ZDB-GENE-040912-26]
ENSDARG00000076673	dspb	1074.23	1.01654	0.35089	2.89703	0.00376716	0.0368106	desmoplakin b [Source:ZFIN;Acc:ZDB-GENE-030131-1662]
ENSDARG00000016527	helz2	425.707	0.989891	0.341839	2.89578	0.00378221	0.0369072	helicase with zinc finger 2, transcriptional coactivator [Source:ZFIN;Acc:ZDB-GENE-120920-1]
ENSDARG00000089357	miga2	75.0155	0.788719	0.272544	2.89391	0.00380478	0.0370893	mitoguardin 2 [Source:NCBI gene;Acc:541431]
ENSDARG00000054060	pof1b	1178.73	0.713642	0.246638	2.89348	0.00381003	0.037105	POF1B actin binding protein [Source:ZFIN;Acc:ZDB-GENE-030131-4287]
ENSDARG00000030630	mfsd2aa	106.292	2.81985	0.97462	2.89328	0.00381244	0.0371107	major facilitator superfamily domain containing 2aa [Source:NCBI gene;Acc:492810]
ENSDARG00000090120	si:dkey-248g21.1	86.7595	1.11341	0.385065	2.8915	0.00383411	0.0372862	si:dkey-248g21.1 [Source:ZFIN;Acc:ZDB-GENE-131119-67]
ENSDARG00000075752	myo18aa	843.494	0.778672	0.269372	2.8907	0.0038439	0.0373457	myosin XVIIIAa [Source:ZFIN;Acc:ZDB-GENE-080425-5]
ENSDARG00000011703	clocka	185.67	1.28487	0.444562	2.89019	0.00385004	0.0373852	clock circadian regulator a [Source:ZFIN;Acc:ZDB-GENE-990630-14]
ENSDARG00000101051	ctsbb	2053.31	2.3161	0.801598	2.88936	0.00386028	0.0374269	cathepsin Bb [Source:ZFIN;Acc:ZDB-GENE-070323-1]
ENSDARG00000114742	CABZ01072083.2	47.6748	1.33034	0.460845	2.88674	0.00389253	0.0376567	dual specificity phosphatase 26 [Source:NCBI gene;Acc:570815]
ENSDARG00000011373	mknk2a	1457.53	1.56569	0.54305	2.88315	0.00393723	0.037999	MAPK interacting serine/threonine kinase 2a [Source:ZFIN;Acc:ZDB-GENE-030131-6099]
ENSDARG00000042496	parp12a	347.772	0.636237	0.220724	2.8825	0.00394537	0.0380595	poly (ADP-ribose) polymerase family, member 12a [Source:ZFIN;Acc:ZDB-GENE-050419-6]
ENSDARG00000103776	CR354610.1	7.03973	3.9925	1.38545	2.88175	0.00395477	NA	0
ENSDARG00000069828	si:ch211-117n7.7	365.124	1.66484	0.577965	2.88052	0.00397016	0.0382264	si:ch211-117n7.7 [Source:ZFIN;Acc:ZDB-GENE-060503-569]
ENSDARG00000024631	nlrc5	561.382	0.983215	0.341539	2.87878	0.0039922	0.0383842	NLR family, CARD domain containing 5 [Source:ZFIN;Acc:ZDB-GENE-080429-2]
ENSDARG00000038524	pik3r1	5224.28	0.733341	0.254833	2.87773	0.00400544	0.0384934	phosphoinositide-3-kinase, regulatory subunit 1 (alpha) [Source:ZFIN;Acc:ZDB-GENE-030131-1280]
ENSDARG00000076780	acadsb	535.979	0.588824	0.204776	2.87546	0.00403441	0.0385899	acyl-CoA dehydrogenase short/branched chain [Source:ZFIN;Acc:ZDB-GENE-070410-109]
ENSDARG00000102436	si:ch211-194b1.1	236.719	0.72293	0.251522	2.87423	0.00405019	0.0387045	si:ch211-194b1.1 [Source:ZFIN;Acc:ZDB-GENE-131126-2]
ENSDARG00000057929	naf1	126.462	0.756169	0.263159	2.87343	0.00406042	0.0387429	nuclear assembly factor 1 homolog (S. cerevisiae) [Source:ZFIN;Acc:ZDB-GENE-030131-4546]
ENSDARG00000114245	PLBD2	1495.2	1.1215	0.390314	2.87332	0.0040618	0.0387429	zgc:158619 [Source:ZFIN;Acc:ZDB-GENE-070209-116]
ENSDARG00000078696	synpo2lb	130.573	2.84877	0.992215	2.87112	0.00409022	0.0389957	synaptopodin 2-like b [Source:ZFIN;Acc:ZDB-GENE-090828-5]
ENSDARG00000070774	irgf1	327.83	1.18892	0.414277	2.86987	0.00410637	0.0390626	immunity-related GTPase family, f1 [Source:ZFIN;Acc:ZDB-GENE-051212-5]
ENSDARG00000071709	ppp1r9bb	297.633	0.955277	0.332978	2.86889	0.00411914	0.0391433	protein phosphatase 1, regulatory subunit 9Bb [Source:ZFIN;Acc:ZDB-GENE-121214-117]
ENSDARG00000018077	rbp1.1	12.8014	4.0773	1.42193	2.86743	0.00413817	NA	retinol binding protein 1, cellular, tandem duplicate 1 [Source:ZFIN;Acc:ZDB-GENE-050421-2]
ENSDARG00000102810	samd1a	172.159	1.1324	0.394943	2.86726	0.00414048	0.039273	sterile alpha motif domain containing 1a [Source:ZFIN;Acc:ZDB-GENE-061013-517]
ENSDARG00000044183	prkab1a	492.834	1.30879	0.457314	2.86192	0.00421086	0.0398294	protein kinase, AMP-activated, beta 1 non-catalytic subunit, a [Source:ZFIN;Acc:ZDB-GENE-040718-377]
ENSDARG00000029473	gstm.2	510.587	0.857257	0.299643	2.86093	0.00422399	0.0398838	glutathione S-transferase mu tandem duplicate 2 [Source:ZFIN;Acc:ZDB-GENE-080218-30]
ENSDARG00000073931	otulina	121.367	0.613355	0.214404	2.86075	0.0042264	0.0398838	OTU deubiquitinase with linear linkage specificity a [Source:ZFIN;Acc:ZDB-GENE-040426-2157]
ENSDARG00000057032	ppm1nb	428.53	1.63893	0.573037	2.86008	0.00423539	0.0399313	protein phosphatase, Mg2+/Mn2+ dependent, 1Nb (putative) [Source:ZFIN;Acc:ZDB-GENE-071004-34]
ENSDARG00000001676	gpm6bb	626.79	1.16187	0.406258	2.85993	0.00423731	0.0399313	glycoprotein M6Bb [Source:ZFIN;Acc:ZDB-GENE-030710-10]
ENSDARG00000099524	gbe1b	827.721	0.985005	0.344636	2.8581	0.00426185	0.0401325	glucan (1,4-alpha-), branching enzyme 1b [Source:ZFIN;Acc:ZDB-GENE-110914-16]
ENSDARG00000035719	arl5c	599.16	1.23583	0.432741	2.85583	0.00429251	0.0403769	ADP-ribosylation factor-like 5C [Source:ZFIN;Acc:ZDB-GENE-040426-1866]
ENSDARG00000103248	FAM167A	26.1103	4.52011	1.58311	2.85522	0.00430075	0.0404171	protein FAM167A-like [Source:NCBI gene;Acc:100535961]
ENSDARG00000101050	tmc8	111.437	1.1085	0.388387	2.85411	0.00431578	0.0405024	transmembrane channel-like 8 [Source:ZFIN;Acc:ZDB-GENE-081114-2]
ENSDARG00000102924	zgc:112334	18.4418	1.64786	0.577464	2.85362	0.00432247	0.0405335	zgc:112334 [Source:ZFIN;Acc:ZDB-GENE-050809-120]
ENSDARG00000019496	esd	704.742	0.979075	0.343129	2.85337	0.00432578	0.0405402	esterase D/formylglutathione hydrolase [Source:ZFIN;Acc:ZDB-GENE-050417-328]
ENSDARG00000101702	chrna7	12.5306	3.8031	1.33288	2.8533	0.00432679	NA	cholinergic receptor, nicotinic, alpha 7 (neuronal) [Source:ZFIN;Acc:ZDB-GENE-040108-3]
ENSDARG00000111714	BOLA2	94.5174	0.734348	0.257376	2.85321	0.00432802	0.0405427	zgc:112271 [Source:ZFIN;Acc:ZDB-GENE-050522-443]
ENSDARG00000035398	enc1	474.764	0.93599	0.328342	2.85066	0.0043629	0.0408132	ectodermal-neural cortex 1 [Source:ZFIN;Acc:ZDB-GENE-060531-140]
ENSDARG00000019530	hdgfl2	440.927	0.672983	0.236327	2.84768	0.00440396	0.0411406	HDGF like 2 [Source:NCBI gene;Acc:80965]
ENSDARG00000102998	taf6	283.287	0.616321	0.216918	2.84126	0.00449353	0.0418203	TAF6 RNA polymerase II, TATA box binding protein (TBP)-associated factor [Source:ZFIN;Acc:ZDB-GENE-040912-23]
ENSDARG00000056483	ssbp4	506.364	0.658702	0.232151	2.83739	0.00454842	0.0422001	single stranded DNA binding protein 4 [Source:ZFIN;Acc:ZDB-GENE-030131-469]
ENSDARG00000114552	siva1	73.6739	0.887059	0.312932	2.83467	0.00458731	0.0424066	SIVA1, apoptosis-inducing factor [Source:ZFIN;Acc:ZDB-GENE-050506-57]
ENSDARG00000013561	pgm1	2707.67	0.799557	0.282594	2.82935	0.00466425	0.0430399	phosphoglucomutase 1 [Source:ZFIN;Acc:ZDB-GENE-040426-1245]
ENSDARG00000038954	ctnnbip1	457.266	0.593599	0.210039	2.82614	0.0047113	0.0433955	catenin, beta interacting protein 1 [Source:ZFIN;Acc:ZDB-GENE-000906-3]
ENSDARG00000093728	CR931802.1	6.4049	2.2719	0.804437	2.82421	0.00473979	NA	0
ENSDARG00000074212	SLC5A10	20.7646	1.79037	0.634172	2.82315	0.00475538	0.0436437	si:dkeyp-9d4.5 [Source:ZFIN;Acc:ZDB-GENE-121214-88]
ENSDARG00000056914	emg1	112.671	0.64581	0.228862	2.82183	0.00477508	0.0437852	EMG1 N1-specific pseudouridine methyltransferase [Source:ZFIN;Acc:ZDB-GENE-060421-2909]
ENSDARG00000062621	satb1b	145.243	1.36276	0.483703	2.81735	0.00484218	0.0441887	SATB homeobox 1b [Source:ZFIN;Acc:ZDB-GENE-030131-7105]
ENSDARG00000045127	FAM53C	242.281	1.31383	0.466526	2.81619	0.00485967	0.0443217	zgc:175066 [Source:ZFIN;Acc:ZDB-GENE-091027-2]
ENSDARG00000060529	nkx6.3	17.8932	2.28118	0.810231	2.81547	0.00487054	0.0444009	NK6 homeobox 3 [Source:ZFIN;Acc:ZDB-GENE-070810-7]
ENSDARG00000024717	selenbp1	765.534	1.08245	0.384747	2.81341	0.00490198	0.0446248	selenium binding protein 1 [Source:NCBI gene;Acc:393542]
ENSDARG00000015536	sox6	423.073	1.048	0.372512	2.81333	0.00490307	0.0446248	SRY-box transcription factor 6 [Source:ZFIN;Acc:ZDB-GENE-081120-6]
ENSDARG00000014068	pgam1b	1603.84	0.585485	0.208147	2.81284	0.00491056	0.0446461	phosphoglycerate mutase 1b [Source:ZFIN;Acc:ZDB-GENE-030131-5376]
ENSDARG00000058874	zgc:113227	26.4061	1.5305	0.54437	2.8115	0.00493105	0.0447866	zgc:113227 [Source:ZFIN;Acc:ZDB-GENE-050327-32]
ENSDARG00000036237	slc27a2a	3160.48	1.53919	0.54751	2.81126	0.00493481	0.0447866	solute carrier family 27 member 2a [Source:ZFIN;Acc:ZDB-GENE-050706-104]
ENSDARG00000112349	CABZ01015105.1	16.2855	3.79292	1.35012	2.80933	0.00496448	0.0449474	0
ENSDARG00000102176	pla1a	403.596	1.03647	0.369155	2.8077	0.00498971	0.0450642	phospholipase A1 member A [Source:NCBI gene;Acc:334017]
ENSDARG00000102143	btr24	33.6152	1.55771	0.555035	2.8065	0.00500827	0.0451519	bloodthirsty-related gene family, member 24 [Source:ZFIN;Acc:ZDB-GENE-070705-376]
ENSDARG00000015158	slc50a1	48.7018	0.946098	0.337163	2.80605	0.00501525	0.0451668	solute carrier family 50 member 1 [Source:NCBI gene;Acc:503533]
ENSDARG00000054442	cbx1b	317.345	0.967259	0.344839	2.80496	0.00503232	0.0452487	chromobox homolog 1b (HP1 beta homolog Drosophila) [Source:ZFIN;Acc:ZDB-GENE-040625-68]
ENSDARG00000002830	trmt2a	162.331	0.856405	0.30574	2.80109	0.00509303	0.0456867	tRNA methyltransferase 2 homolog A [Source:ZFIN;Acc:ZDB-GENE-030131-6876]
ENSDARG00000076296	triqk	451.009	0.724926	0.258823	2.80085	0.00509683	0.0456867	triple QxxK/R motif containing [Source:NCBI gene;Acc:100147776]
ENSDARG00000051955	brms1	240.022	0.710269	0.253603	2.80072	0.00509895	0.0456867	BRMS1 transcriptional repressor and anoikis regulator [Source:ZFIN;Acc:ZDB-GENE-030616-596]
ENSDARG00000040991	cttnbp2	591.001	1.32263	0.472313	2.80033	0.005105	0.0457007	cortactin binding protein 2 [Source:ZFIN;Acc:ZDB-GENE-030131-8134]
ENSDARG00000104489	CR855389.2	8.35174	2.79762	0.999189	2.79989	0.00511199	NA	0
ENSDARG00000045694	prickle1b	161.445	1.153	0.411902	2.79921	0.00512284	0.0457818	prickle homolog 1b [Source:ZFIN;Acc:ZDB-GENE-030131-2152]
ENSDARG00000036105	si:dkeyp-92c9.2	31.2588	4.01574	1.43518	2.79808	0.00514069	0.0458993	si:dkeyp-92c9.2 [Source:ZFIN;Acc:ZDB-GENE-060503-468]
ENSDARG00000055722	bco2a	480.891	1.3895	0.497005	2.79575	0.00517789	0.0461709	beta-carotene oxygenase 2a [Source:ZFIN;Acc:ZDB-GENE-030131-8039]
ENSDARG00000099824	nots	17.4957	2.49927	0.895198	2.79186	0.00524059	0.0465923	nothepsin [Source:ZFIN;Acc:ZDB-GENE-010620-1]
ENSDARG00000005525	acy3.2	355.952	0.845935	0.303129	2.79068	0.0052598	0.046697	aspartoacylase (aminocyclase) 3, tandem duplicate 2 [Source:NCBI gene;Acc:436619]
ENSDARG00000087331	si:dkey-77f5.3	79.7266	0.793842	0.284614	2.78919	0.00528401	0.0468508	si:dkey-77f5.3 [Source:ZFIN;Acc:ZDB-GENE-030131-5102]
ENSDARG00000016809	prkacab	728.429	0.620229	0.222432	2.7884	0.00529693	0.0469444	protein kinase, cAMP-dependent, catalytic, alpha, genome duplicate b [Source:ZFIN;Acc:ZDB-GENE-040801-208]
ENSDARG00000018060	pik3r2	759.413	1.02799	0.368684	2.78826	0.00529918	0.0469444	phosphoinositide-3-kinase, regulatory subunit 2 (beta) [Source:ZFIN;Acc:ZDB-GENE-040309-1]
ENSDARG00000004199	spam1	179.289	2.35481	0.845885	2.78384	0.00537196	0.0474449	sperm adhesion molecule 1 [Source:ZFIN;Acc:ZDB-GENE-050506-63]
ENSDARG00000055115	dtnbp1a	726.172	0.625833	0.224866	2.78314	0.00538357	0.0474986	dystrobrevin binding protein 1a [Source:NCBI gene;Acc:394109]
ENSDARG00000037555	atoh8	90.659	1.06387	0.382646	2.78029	0.00543099	0.0478214	atonal bHLH transcription factor 8 [Source:NCBI gene;Acc:561606]
ENSDARG00000034883	acbd5a	1270.74	0.855093	0.307747	2.77856	0.00546008	0.048036	acyl-CoA binding domain containing 5a [Source:NCBI gene;Acc:553674]
ENSDARG00000012777	nucks1b	1224.38	0.707912	0.255268	2.77321	0.0055507	0.0486235	nuclear casein kinase and cyclin-dependent kinase substrate 1b [Source:ZFIN;Acc:ZDB-GENE-030131-4544]
ENSDARG00000045482	stk38l	143.47	0.864553	0.311796	2.77282	0.00555733	0.0486606	serine/threonine kinase 38 like [Source:ZFIN;Acc:ZDB-GENE-040426-798]
ENSDARG00000058351	tapbpl	432.517	0.626747	0.226062	2.77245	0.00556358	0.0486742	TAP binding protein like [Source:ZFIN;Acc:ZDB-GENE-121003-1]
ENSDARG00000105603	BX957276.1	7.25344	2.71944	0.981461	2.77081	0.00559176	NA	0
ENSDARG00000097740	elob	65.5167	1.1664	0.421112	2.76982	0.00560875	0.04888	elongin B [Source:ZFIN;Acc:ZDB-GENE-020415-1]
ENSDARG00000003068	gorasp1a	407.898	0.656432	0.237273	2.76656	0.00566503	0.0492863	golgi reassembly stacking protein 1a [Source:ZFIN;Acc:ZDB-GENE-030826-23]
ENSDARG00000106473	KCNH2	29.1747	4.25777	1.53978	2.76519	0.00568905	0.049453	potassium voltage-gated channel subfamily H member 2 [Source:HGNC Symbol;Acc:HGNC:6251]
ENSDARG00000044001	lgals3b	1337.64	1.0494	0.379775	2.76321	0.00572353	0.0496892	lectin, galactoside binding soluble 3b [Source:ZFIN;Acc:ZDB-GENE-030131-4324]
ENSDARG00000019877	rbks	311.385	0.669487	0.242533	2.7604	0.00577309	0.0499493	ribokinase [Source:ZFIN;Acc:ZDB-GENE-040625-112]
ENSDARG00000098776	BX640547.2	26.9263	1.65803	0.601629	2.7559	0.00585311	0.0504834	0
ENSDARG00000020811	efemp2b	227.813	1.64079	0.595384	2.75586	0.00585384	0.0504834	EGF containing fibulin extracellular matrix protein 2b [Source:ZFIN;Acc:ZDB-GENE-030219-125]
ENSDARG00000075454	hdc	108.996	2.20798	0.801207	2.75581	0.00585461	0.0504834	histidine decarboxylase [Source:ZFIN;Acc:ZDB-GENE-080102-5]
ENSDARG00000071876	rell2	41.2931	1.73466	0.629953	2.75363	0.00589378	0.0506711	RELT like 2 [Source:ZFIN;Acc:ZDB-GENE-060421-6581]
ENSDARG00000104027	si:ch211-207b24.4	25.0806	2.6487	0.965216	2.74415	0.00606678	0.0518006	si:ch211-207b24.4 [Source:ZFIN;Acc:ZDB-GENE-100921-9]
ENSDARG00000078918	comtd1	1980.51	1.92966	0.703283	2.7438	0.00607333	0.0518121	catechol-O-methyltransferase domain containing 1 [Source:ZFIN;Acc:ZDB-GENE-030131-1072]
ENSDARG00000054048	plin1	5.67264	3.81647	1.39172	2.74227	0.00610169	NA	perilipin 1 [Source:ZFIN;Acc:ZDB-GENE-050419-213]
ENSDARG00000055813	si:dkey-225f5.5	47.7629	1.30479	0.47586	2.74196	0.00610741	0.0520252	si:dkey-225f5.5 [Source:ZFIN;Acc:ZDB-GENE-141216-18]
ENSDARG00000007169	itgb1bp1	229.379	0.75984	0.277283	2.7403	0.00613829	0.0522145	integrin beta 1 binding protein 1 [Source:ZFIN;Acc:ZDB-GENE-051113-264]
ENSDARG00000101146	CR293511.1	17.3389	1.58607	0.57883	2.74013	0.00614155	0.0522145	Fc receptor-like protein 5 [Source:NCBI gene;Acc:101886098]
ENSDARG00000069560	kcnh3	64.643	3.83231	1.39861	2.74008	0.00614243	0.0522145	potassium voltage-gated channel, subfamily H (eag-related), member 3 [Source:ZFIN;Acc:ZDB-GENE-070912-23]
ENSDARG00000058115	fgfr2	986.148	0.653045	0.238401	2.73927	0.00615757	0.0522795	fibroblast growth factor receptor 2 [Source:NCBI gene;Acc:352940]
ENSDARG00000092584	si:ch1073-385f13.3	79.7974	1.27106	0.464183	2.73827	0.00617635	0.0523936	si:ch1073-385f13.3 [Source:ZFIN;Acc:ZDB-GENE-131127-357]
ENSDARG00000101526	si:dkey-82o10.4	61.5084	1.08785	0.39748	2.73685	0.00620302	0.0524889	si:dkey-82o10.4 [Source:ZFIN;Acc:ZDB-GENE-141222-46]
ENSDARG00000028336	dhdhl	1047.61	0.740216	0.270605	2.73541	0.00623025	0.0526946	dihydrodiol dehydrogenase (dimeric), like [Source:ZFIN;Acc:ZDB-GENE-040426-2180]
ENSDARG00000070898	si:ch211-262h13.3	140.045	0.615353	0.225175	2.73278	0.00628027	0.0530433	si:ch211-262h13.3 [Source:ZFIN;Acc:ZDB-GENE-050208-532]
ENSDARG00000070387	nudt7	201.868	0.614829	0.224989	2.73271	0.00628155	0.0530433	nudix (nucleoside diphosphate linked moiety X)-type motif 7 [Source:ZFIN;Acc:ZDB-GENE-131127-212]
ENSDARG00000086842	dap1b	479.302	1.24229	0.454665	2.73233	0.00628888	0.0530832	death associated protein 1b [Source:ZFIN;Acc:ZDB-GENE-000511-4]
ENSDARG00000063191	extl2	71.9147	0.726453	0.26623	2.72867	0.0063591	0.0535209	exostosin-like glycosyltransferase 2 [Source:ZFIN;Acc:ZDB-GENE-060929-1122]
ENSDARG00000104663	zgc:103755	32.8742	1.9787	0.725348	2.72794	0.00637316	0.053595	zgc:103755 [Source:ZFIN;Acc:ZDB-GENE-041010-101]
ENSDARG00000016868	rhobtb4	306.042	1.15611	0.423852	2.72764	0.00637895	0.0536216	Rho related BTB domain containing 4 [Source:ZFIN;Acc:ZDB-GENE-060315-11]
ENSDARG00000031422	igfbp2b	430.403	1.30612	0.478928	2.72717	0.00638809	0.0536763	insulin-like growth factor binding protein 2b [Source:NCBI gene;Acc:798920]
ENSDARG00000014866	hprt1l	126.506	1.5803	0.579865	2.72528	0.00642466	0.0539133	hypoxanthine phosphoribosyltransferase 1, like [Source:ZFIN;Acc:ZDB-GENE-040625-17]
ENSDARG00000013830	osbpl2b	1776.39	0.713824	0.261938	2.72517	0.00642688	0.0539133	oxysterol binding protein-like 2b [Source:ZFIN;Acc:ZDB-GENE-030131-6138]
ENSDARG00000056587	cyp2r1	206.504	2.55819	0.938801	2.72496	0.00643096	0.0539254	cytochrome P450, family 2, subfamily R, polypeptide 1 [Source:ZFIN;Acc:ZDB-GENE-110114-1]
ENSDARG00000019713	oatx	90.4795	2.22292	0.816584	2.72222	0.00648453	0.0542408	organic anion transporter X [Source:ZFIN;Acc:ZDB-GENE-070115-1]
ENSDARG00000015016	kif26ab	238.981	1.04336	0.383416	2.72122	0.00650416	0.0543827	kinesin family member 26Ab [Source:ZFIN;Acc:ZDB-GENE-100716-6]
ENSDARG00000104431	slc1a3a	749.557	0.847017	0.311485	2.71929	0.00654222	0.0546114	solute carrier family 1 member 3a [Source:NCBI gene;Acc:323439]
ENSDARG00000089791	slc25a32a	556.422	1.25009	0.459915	2.71808	0.0065661	0.0546891	solute carrier family 25 member 32a [Source:ZFIN;Acc:ZDB-GENE-040426-758]
ENSDARG00000029259	zgc:136493	230.327	1.15314	0.424255	2.71803	0.0065672	0.0546891	zgc:136493 [Source:ZFIN;Acc:ZDB-GENE-060512-216]
ENSDARG00000068082	wbp4	50.6143	0.929371	0.341931	2.71801	0.00656763	0.0546891	WW domain binding protein 4 [Source:ZFIN;Acc:ZDB-GENE-050522-342]
ENSDARG00000020455	si:ch211-171h4.3	169.682	1.76439	0.649432	2.71682	0.00659122	0.054791	si:ch211-171h4.3 [Source:ZFIN;Acc:ZDB-GENE-081031-85]
ENSDARG00000015002	cdh4	256.634	0.96065	0.353596	2.7168	0.00659167	0.054791	cadherin 4, type 1, R-cadherin (retinal) [Source:ZFIN;Acc:ZDB-GENE-991207-1]
ENSDARG00000053136	b2m	25623.8	0.788043	0.290248	2.71507	0.00662624	0.0549752	beta-2-microglobulin [Source:NCBI gene;Acc:30400]
ENSDARG00000063419	DHX35	172.018	0.765901	0.282115	2.71485	0.00663059	0.0549888	zgc:158828 [Source:ZFIN;Acc:ZDB-GENE-070410-11]
ENSDARG00000070839	evi5b	442.404	0.715041	0.263614	2.71246	0.00667865	0.0552559	ecotropic viral integration site 5b [Source:ZFIN;Acc:ZDB-GENE-041111-244]
ENSDARG00000096668	MZT1	100.062	0.606032	0.223427	2.71244	0.00667905	0.0552559	si:dkey-15d12.2 [Source:NCBI gene;Acc:100333194]
ENSDARG00000087099	si:ch73-106k19.5	421.976	2.30179	0.849363	2.71002	0.00672786	0.0556146	si:ch73-106k19.5 [Source:ZFIN;Acc:ZDB-GENE-030131-1230]
ENSDARG00000074665	cdk14	80.4776	3.52106	1.29986	2.7088	0.00675275	0.0557978	cyclin-dependent kinase 14 [Source:ZFIN;Acc:ZDB-GENE-080220-44]
ENSDARG00000025904	tecrb	1909.69	0.884669	0.327128	2.70435	0.0068438	0.0563446	trans-2,3-enoyl-CoA reductase b [Source:ZFIN;Acc:ZDB-GENE-030131-5154]
ENSDARG00000003872	ccdc102a	283.303	0.795891	0.294401	2.70342	0.00686299	0.0564343	coiled-coil domain containing 102A [Source:NCBI gene;Acc:325319]
ENSDARG00000067872	CU469531.1	69.5917	1.36217	0.504182	2.70174	0.00689785	0.0566595	0
ENSDARG00000053485	aldh6a1	5399.47	0.759917	0.281301	2.70144	0.00690408	0.0566595	aldehyde dehydrogenase 6 family, member A1 [Source:ZFIN;Acc:ZDB-GENE-030131-9192]
ENSDARG00000100599	c1s	1031.36	1.11605	0.41346	2.69929	0.00694869	0.0568638	complement component 1, s subcomponent [Source:ZFIN;Acc:ZDB-GENE-030131-1232]
ENSDARG00000074169	gpam	209.561	1.24464	0.461249	2.69841	0.00696717	0.0569396	glycerol-3-phosphate acyltransferase, mitochondrial [Source:ZFIN;Acc:ZDB-GENE-101026-1]
ENSDARG00000056233	zgc:110591	369.398	0.800916	0.29688	2.69777	0.00698048	0.0569412	zgc:110591 [Source:NCBI gene;Acc:402849]
ENSDARG00000036291	nucb2b	1037.05	0.62346	0.231207	2.69654	0.00700639	0.0571297	nucleobindin 2b [Source:ZFIN;Acc:ZDB-GENE-030131-4775]
ENSDARG00000009194	col16a1	424.741	1.32642	0.492016	2.69588	0.00702029	0.0571309	collagen, type XVI, alpha 1 [Source:ZFIN;Acc:ZDB-GENE-060503-351]
ENSDARG00000027887	zfyve21	514.175	0.663707	0.246374	2.6939	0.00706207	0.0574001	zinc finger, FYVE domain containing 21 [Source:ZFIN;Acc:ZDB-GENE-030131-1296]
ENSDARG00000035151	drll.1	7.08501	3.7934	1.40822	2.69376	0.00706509	NA	draculin-like, tandem duplicate 1 [Source:ZFIN;Acc:ZDB-GENE-060531-124]
ENSDARG00000097712	CR848667.1	31.4181	1.43386	0.532358	2.69341	0.00707249	0.0574619	0
ENSDARG00000034852	nt5c2l1	230.679	1.23952	0.461367	2.68664	0.00721754	0.058292	5'-nucleotidase, cytosolic II, like 1 [Source:ZFIN;Acc:ZDB-GENE-031006-8]
ENSDARG00000017400	klf1	36.8076	1.73716	0.646683	2.68626	0.00722573	0.0583351	Kruppel-like factor 1 (erythroid) [Source:ZFIN;Acc:ZDB-GENE-980526-55]
ENSDARG00000078429	vtg4	48.7449	4.52057	1.68395	2.68451	0.00726364	0.0585252	vitellogenin 4 [Source:ZFIN;Acc:ZDB-GENE-001201-3]
ENSDARG00000025983	l3mbtl3	128.03	1.55597	0.579993	2.68274	0.00730207	0.0587652	L3MBTL histone methyl-lysine binding protein 3 [Source:ZFIN;Acc:ZDB-GENE-040724-127]
ENSDARG00000052057	pcolceb	90.7558	1.48573	0.554077	2.68144	0.00733057	0.0589058	procollagen C-endopeptidase enhancer b [Source:ZFIN;Acc:ZDB-GENE-080722-44]
ENSDARG00000102531	anapc11	164.989	0.701879	0.261757	2.68142	0.00733108	0.0589058	APC11 anaphase promoting complex subunit 11 homolog (yeast) [Source:ZFIN;Acc:ZDB-GENE-061013-383]
ENSDARG00000041911	si:ch211-245h14.1	94.9672	1.03914	0.387775	2.67974	0.00736786	0.0591081	si:ch211-245h14.1 [Source:ZFIN;Acc:ZDB-GENE-041014-350]
ENSDARG00000070360	inka1a	84.1354	0.786714	0.2937	2.67863	0.00739229	0.0592575	inka box actin regulator 1a [Source:NCBI gene;Acc:692272]
ENSDARG00000035663	zgc:103438	493.714	0.819128	0.305995	2.67694	0.00742985	0.0595117	zgc:103438 [Source:ZFIN;Acc:ZDB-GENE-041010-131]
ENSDARG00000098831	gcdhb	722.199	0.720612	0.269282	2.67605	0.00744948	0.0596221	glutaryl-CoA dehydrogenase b [Source:ZFIN;Acc:ZDB-GENE-041010-117]
ENSDARG00000095509	CR759885.1	85.8859	1.67154	0.624918	2.67481	0.00747722	0.0597738	0
ENSDARG00000030087	nfkbib	2908.08	0.713021	0.266638	2.67412	0.0074926	0.05987	nuclear factor of kappa light polypeptide gene enhancer in B-cells inhibitor, beta [Source:ZFIN;Acc:ZDB-GENE-070705-529]
ENSDARG00000089221	si:ch211-195o20.7	73.3933	0.876922	0.328029	2.67331	0.00751077	0.0599715	si:ch211-195o20.7 [Source:ZFIN;Acc:ZDB-GENE-131127-614]
ENSDARG00000003877	pbrm1	389.918	1.44451	0.540476	2.67267	0.00752502	0.0600618	polybromo 1 [Source:ZFIN;Acc:ZDB-GENE-080926-4]
ENSDARG00000045776	cnbpa	1508.02	0.730017	0.273215	2.67195	0.00754117	0.0601435	CCHC-type zinc finger, nucleic acid binding protein a [Source:ZFIN;Acc:ZDB-GENE-030131-5045]
ENSDARG00000074734	msl1a	330.347	0.709621	0.265676	2.671	0.00756254	0.0602111	MSL complex subunit 1a [Source:NCBI gene;Acc:100000715]
ENSDARG00000060688	trim69	23.9179	1.38555	0.519146	2.6689	0.00761003	0.0604092	tripartite motif containing 69 [Source:ZFIN;Acc:ZDB-GENE-030131-857]
ENSDARG00000019529	parp1	397.828	1.26946	0.47569	2.66866	0.00761549	0.0604266	poly (ADP-ribose) polymerase 1 [Source:ZFIN;Acc:ZDB-GENE-030131-3955]
ENSDARG00000074754	si:dkey-188i13.9	87.2681	1.60843	0.603093	2.66696	0.00765401	0.0605463	si:dkey-188i13.9 [Source:ZFIN;Acc:ZDB-GENE-090313-211]
ENSDARG00000096222	si:ch211-245n8.4	23.547	1.25483	0.470573	2.6666	0.00766217	0.0605873	si:ch211-245n8.4 [Source:ZFIN;Acc:ZDB-GENE-110914-56]
ENSDARG00000045352	cst14a.2	523.02	0.796287	0.299005	2.66312	0.00774188	0.0610519	cystatin 14a, tandem duplicate 2 [Source:ZFIN;Acc:ZDB-GENE-040426-1065]
ENSDARG00000016825	vtg6	27.2121	4.06007	1.5263	2.66008	0.00781232	0.0614885	vitellogenin 6 [Source:ZFIN;Acc:ZDB-GENE-001201-5]
ENSDARG00000017659	sephs2	2077.97	0.702099	0.264066	2.6588	0.00784205	0.061637	selenophosphate synthetase 2 [Source:ZFIN;Acc:ZDB-GENE-030327-5]
ENSDARG00000093623	CR392341.1	72.7308	1.06637	0.401094	2.65864	0.00784569	0.061637	0
ENSDARG00000082511	0	3.49478	3.92618	1.47703	2.65816	0.00785685	NA	small nucleolar RNA, C/D box 18C [Source:HGNC Symbol;Acc:HGNC:32716]
ENSDARG00000070038	rbp2a	26551.7	1.12684	0.423932	2.65806	0.00785914	0.0616666	retinol binding protein 2a, cellular [Source:ZFIN;Acc:ZDB-GENE-020320-2]
ENSDARG00000013771	ctss2.2	765.023	0.893405	0.336178	2.65754	0.0078714	0.0616915	cathepsin S, ortholog 2, tandem duplicate 2 [Source:ZFIN;Acc:ZDB-GENE-050626-55]
ENSDARG00000079626	elf2b	595.382	0.606076	0.22823	2.65555	0.00791793	0.0619848	E74-like factor 2b (ets domain transcription factor) [Source:ZFIN;Acc:ZDB-GENE-031215-1]
ENSDARG00000093799	setbp1	302.723	1.06423	0.401048	2.65362	0.00796338	0.0621735	SET binding protein 1 [Source:ZFIN;Acc:ZDB-GENE-060526-72]
ENSDARG00000099792	BX908776.1	44.4578	1.15605	0.43574	2.65307	0.00797632	0.0622245	0
ENSDARG00000093864	wee1	362.24	0.92118	0.347228	2.65295	0.00797906	0.0622245	WEE1 G2 checkpoint kinase [Source:ZFIN;Acc:ZDB-GENE-030131-5268]
ENSDARG00000076544	aldh5a1	387.609	0.692334	0.260993	2.65269	0.00798531	0.0622394	aldehyde dehydrogenase 5 family, member A1 (succinate-semialdehyde dehydrogenase) [Source:ZFIN;Acc:ZDB-GENE-070228-2]
ENSDARG00000104581	tom1	296.096	0.733751	0.276621	2.65255	0.00798871	0.0622394	target of myb1 membrane trafficking protein [Source:ZFIN;Acc:ZDB-GENE-060721-1]
ENSDARG00000098108	dusp2	222.108	1.21109	0.456591	2.65245	0.00799096	0.0622394	dual specificity phosphatase 2 [Source:ZFIN;Acc:ZDB-GENE-040801-188]
ENSDARG00000074041	abca5	361.11	0.607333	0.228979	2.65236	0.00799319	0.0622394	ATP-binding cassette, sub-family A (ABC1), member 5 [Source:ZFIN;Acc:ZDB-GENE-050517-5]
ENSDARG00000069386	mtg1	92.54	0.774676	0.292134	2.65178	0.00800681	0.0623217	mitochondrial ribosome-associated GTPase 1 [Source:ZFIN;Acc:ZDB-GENE-031110-2]
ENSDARG00000006601	kaznb	279.285	0.605282	0.228362	2.65053	0.00803653	0.0624296	kazrin, periplakin interacting protein b [Source:ZFIN;Acc:ZDB-GENE-061215-31]
ENSDARG00000091993	dicp1.1	64.8354	1.87744	0.709196	2.64728	0.00811424	0.0629417	diverse immunoglobulin domain-containing protein 1.1 [Source:ZFIN;Acc:ZDB-GENE-120305-1]
ENSDARG00000039325	pmepa1	80.6478	0.858796	0.324472	2.64675	0.00812694	0.0629923	prostate transmembrane protein, androgen induced 1 [Source:ZFIN;Acc:ZDB-GENE-040718-320]
ENSDARG00000017441	mylz3	9182.99	1.40205	0.530688	2.64195	0.00824293	0.0637701	myosin, light polypeptide 3, skeletal muscle [Source:ZFIN;Acc:ZDB-GENE-000322-6]
ENSDARG00000068683	chmp2ba	15.359	2.63935	0.99921	2.64143	0.00825556	0.0638437	charged multivesicular body protein 2Ba [Source:ZFIN;Acc:ZDB-GENE-070628-3]
ENSDARG00000045666	ANKRD50	187.142	0.755721	0.286406	2.63864	0.00832396	0.0642508	ankyrin repeat domain 50 [Source:HGNC Symbol;Acc:HGNC:29223]
ENSDARG00000095139	CR388373.2	2.72583	4.52135	1.71387	2.63809	0.00833738	NA	uncharacterized LOC101885092 [Source:NCBI gene;Acc:101885092]
ENSDARG00000105223	pmp22a	161.807	1.14048	0.432854	2.63479	0.00841901	0.064814	peripheral myelin protein 22a [Source:ZFIN;Acc:ZDB-GENE-030131-6757]
ENSDARG00000062326	hmgn7	2145.5	0.660214	0.250735	2.63311	0.0084607	0.06506	high mobility group nucleosomal binding domain 7 [Source:ZFIN;Acc:ZDB-GENE-061215-23]
ENSDARG00000104654	leap2	1357.32	1.82465	0.693016	2.63291	0.00846566	0.0650627	liver-expressed antimicrobial peptide 2 [Source:ZFIN;Acc:ZDB-GENE-081022-131]
ENSDARG00000059944	c1qtnf2	40.0777	1.62923	0.619153	2.63138	0.00850385	0.0652933	C1q and TNF related 2 [Source:ZFIN;Acc:ZDB-GENE-030131-5133]
ENSDARG00000069425	hsbp1a	199.659	1.82963	0.695444	2.63088	0.00851634	0.0653331	heat shock factor binding protein 1a [Source:ZFIN;Acc:ZDB-GENE-050320-136]
ENSDARG00000035993	sumo3b	384.682	0.593876	0.22574	2.63079	0.00851864	0.0653331	small ubiquitin like modifier 3b [Source:NCBI gene;Acc:436950]
ENSDARG00000058102	sardh	396.466	1.57372	0.598312	2.63027	0.00853172	0.065394	sarcosine dehydrogenase [Source:ZFIN;Acc:ZDB-GENE-040426-996]
ENSDARG00000018944	hoga1	297.564	1.13719	0.432355	2.63022	0.008533	0.065394	4-hydroxy-2-oxoglutarate aldolase 1 [Source:NCBI gene;Acc:405806]
ENSDARG00000056244	zgc:171740	41.8125	2.2994	0.874503	2.62938	0.00855412	0.0655066	zgc:171740 [Source:ZFIN;Acc:ZDB-GENE-071004-29]
ENSDARG00000099791	pdk3b	81.5707	1.86911	0.711474	2.6271	0.00861156	0.0657736	pyruvate dehydrogenase kinase, isozyme 3b [Source:ZFIN;Acc:ZDB-GENE-070112-1892]
ENSDARG00000035887	zgc:91944	384.238	0.75337	0.286916	2.62575	0.00864586	0.0660109	zgc:91944 [Source:ZFIN;Acc:ZDB-GENE-040718-417]
ENSDARG00000097518	BX537110.1	3.27223	4.25048	1.62047	2.62299	0.0087162	NA	0
ENSDARG00000079622	frmd5	70.838	2.22635	0.849863	2.61966	0.00880171	0.0669982	FERM domain containing 5 [Source:ZFIN;Acc:ZDB-GENE-060810-165]
ENSDARG00000097637	si:ch211-246i5.5	148.316	1.31755	0.503024	2.61925	0.00881223	0.0669982	si:ch211-246i5.5 [Source:ZFIN;Acc:ZDB-GENE-131121-529]
ENSDARG00000005078	eif4e3	827.563	0.636013	0.243029	2.61703	0.00886989	0.0672757	eukaryotic translation initiation factor 4E family member 3 [Source:NCBI gene;Acc:447850]
ENSDARG00000022378	mtmr1b	98.4125	1.06076	0.405393	2.61661	0.00888076	0.0673004	myotubularin related protein 1b [Source:ZFIN;Acc:ZDB-GENE-050327-48]
ENSDARG00000042881	nthl1	88.1386	0.825183	0.31542	2.61614	0.00889296	0.0673281	nth-like DNA glycosylase 1 [Source:ZFIN;Acc:ZDB-GENE-120511-4]
ENSDARG00000089983	si:ch73-109i22.2	60.9574	1.34979	0.515956	2.61609	0.00889432	0.0673281	si:ch73-109i22.2 [Source:ZFIN;Acc:ZDB-GENE-141211-57]
ENSDARG00000088981	tmem220	210.332	0.677573	0.259048	2.61563	0.0089063	0.0673372	transmembrane protein 220 [Source:ZFIN;Acc:ZDB-GENE-131121-194]
ENSDARG00000053383	rprma	23.6456	3.55198	1.35807	2.61546	0.00891081	0.0673372	reprimo, TP53 dependent G2 arrest mediator candidate a [Source:NCBI gene;Acc:553689]
ENSDARG00000075819	arhgef2	138.897	0.661769	0.253027	2.61541	0.00891204	0.0673372	rho/rac guanine nucleotide exchange factor (GEF) 2 [Source:ZFIN;Acc:ZDB-GENE-030717-1]
ENSDARG00000045681	irf5	134.653	0.637831	0.244417	2.6096	0.0090647	0.0683203	interferon regulatory factor 5 [Source:ZFIN;Acc:ZDB-GENE-040426-2587]
ENSDARG00000045843	apex1	367.839	0.841756	0.322603	2.60926	0.00907377	0.0683566	APEX nuclease (multifunctional DNA repair enzyme) 1 [Source:NCBI gene;Acc:406730]
ENSDARG00000042428	gstt1a	2959.26	1.22189	0.468811	2.60635	0.00915127	0.0688387	glutathione S-transferase theta 1a [Source:ZFIN;Acc:ZDB-GENE-031001-13]
ENSDARG00000114823	PLXNA1	198.111	0.674456	0.259097	2.6031	0.00923838	0.0693406	plexin A1 [Source:HGNC Symbol;Acc:HGNC:9099]
ENSDARG00000075375	zgc:171501	7.34963	2.77686	1.06749	2.6013	0.00928717	NA	zgc:171501 [Source:ZFIN;Acc:ZDB-GENE-080204-10]
ENSDARG00000104458	rnasekb	596.886	1.57415	0.605277	2.60071	0.00930309	0.0697492	ribonuclease, RNase K b [Source:NCBI gene;Acc:336290]
ENSDARG00000027143	aptx	71.218	0.811004	0.312003	2.59935	0.00934018	0.0699501	aprataxin [Source:NCBI gene;Acc:405797]
ENSDARG00000023003	ccdc12	92.7659	0.688339	0.265004	2.59746	0.00939151	0.0702572	coiled-coil domain containing 12 [Source:ZFIN;Acc:ZDB-GENE-040801-108]
ENSDARG00000036636	ebpl	199.021	1.21584	0.468666	2.59426	0.00947936	0.0707586	EBP like [Source:ZFIN;Acc:ZDB-GENE-030616-542]
ENSDARG00000062199	si:dkey-217l24.1	77.7083	0.935473	0.360617	2.59409	0.00948419	0.0707688	si:dkey-217l24.1 [Source:ZFIN;Acc:ZDB-GENE-131121-4]
ENSDARG00000013203	si:ch211-1f22.1	14.3088	1.88101	0.725291	2.59345	0.00950186	0.0708488	si:ch211-1f22.1 [Source:ZFIN;Acc:ZDB-GENE-121214-79]
ENSDARG00000012397	eya4	111.556	0.976919	0.377051	2.59095	0.00957126	0.071236	EYA transcriptional coactivator and phosphatase 4 [Source:ZFIN;Acc:ZDB-GENE-050327-93]
ENSDARG00000037941	syt5a	25.4582	2.63363	1.01868	2.58535	0.00972811	0.0722155	synaptotagmin Va [Source:ZFIN;Acc:ZDB-GENE-040718-110]
ENSDARG00000035771	0	394	0.969383	0.374987	2.58511	0.00973473	0.0722155	si:ch1073-157b13.1 [Source:ZFIN;Acc:ZDB-GENE-110411-13]
ENSDARG00000101794	atp6v0e1	235.097	0.648069	0.25071	2.58494	0.00973967	0.0722258	ATPase H+ transporting V0 subunit e1 [Source:ZFIN;Acc:ZDB-GENE-041010-133]
ENSDARG00000020979	ripor3	64.192	1.47869	0.572071	2.58481	0.00974327	0.0722263	RIPOR family member 3 [Source:NCBI gene;Acc:503535]
ENSDARG00000039522	tubb2	616.252	3.34563	1.29742	2.57867	0.00991813	0.0730564	tubulin, beta 2A class IIa [Source:ZFIN;Acc:ZDB-GENE-050522-384]
ENSDARG00000088764	lyplal1	73.4793	0.749639	0.290714	2.57861	0.00991974	0.0730564	lysophospholipase like 1 [Source:ZFIN;Acc:ZDB-GENE-050306-32]
ENSDARG00000094725	si:ch211-284e13.5	58.4978	0.778405	0.301897	2.57838	0.0099264	0.0730791	si:ch211-284e13.5 [Source:ZFIN;Acc:ZDB-GENE-060526-162]
ENSDARG00000059437	fktn	172.141	0.712635	0.276724	2.57526	0.0100165	0.0735653	fukutin [Source:ZFIN;Acc:ZDB-GENE-070410-96]
ENSDARG00000073716	cpxm1a	156.86	0.856057	0.332421	2.57522	0.0100177	0.0735653	carboxypeptidase X (M14 family), member 1a [Source:ZFIN;Acc:ZDB-GENE-030131-5284]
ENSDARG00000103179	CU639397.1	43.1559	1.50696	0.585462	2.57397	0.010054	0.0736726	0
ENSDARG00000071467	zbtb33	183.725	0.79011	0.307002	2.57363	0.0100637	0.0736906	zinc finger and BTB domain containing 33 [Source:ZFIN;Acc:ZDB-GENE-070412-3]
ENSDARG00000061956	sytl2a	59.4279	3.53914	1.37716	2.56989	0.010173	0.0742778	synaptotagmin-like 2a [Source:ZFIN;Acc:ZDB-GENE-130723-2]
ENSDARG00000061195	cnnm2a	65.9123	0.630292	0.245292	2.56956	0.0101829	0.0743234	cyclin and CBS domain divalent metal cation transport mediator 2a [Source:ZFIN;Acc:ZDB-GENE-050208-36]
ENSDARG00000067927	0	4.28552	3.61019	1.40515	2.56925	0.010192	NA	protein eva-1 homolog A-like [Source:NCBI gene;Acc:101882949]
ENSDARG00000095446	CR383662.3	8.61733	3.48857	1.35858	2.56781	0.0102343	NA	0
ENSDARG00000104937	PTPRD	2949.82	0.852916	0.332192	2.56754	0.0102423	0.0746234	protein tyrosine phosphatase, receptor type D [Source:NCBI gene;Acc:100330629]
ENSDARG00000056793	jazf1b	57.3236	1.60819	0.626612	2.56648	0.0102737	0.0747991	JAZF zinc finger 1b [Source:ZFIN;Acc:ZDB-GENE-041212-56]
ENSDARG00000077330	SH3TC1	239.448	1.38212	0.539007	2.5642	0.0103415	0.075185	SH3 domain and tetratricopeptide repeats 1 [Source:NCBI gene;Acc:100535608]
ENSDARG00000043313	ank2b	2778.49	1.24154	0.484291	2.56361	0.0103589	0.0752041	ankyrin 2b, neuronal [Source:ZFIN;Acc:ZDB-GENE-041010-165]
ENSDARG00000001621	nfyal	107.519	0.937223	0.365641	2.56324	0.0103702	0.0752327	nuclear transcription factor Y, alpha, like [Source:ZFIN;Acc:ZDB-GENE-040718-491]
ENSDARG00000095022	thsd7ba	182.03	3.70723	1.44677	2.56243	0.0103944	0.0753815	thrombospondin, type I, domain containing 7Ba [Source:ZFIN;Acc:ZDB-GENE-070621-2]
ENSDARG00000016301	zgc:65894	2452.01	2.0626	0.805474	2.56072	0.0104455	0.075671	zgc:65894 [Source:ZFIN;Acc:ZDB-GENE-030131-7741]
ENSDARG00000021140	pabpc1b	2481.55	1.32982	0.519352	2.56054	0.0104509	0.075671	poly A binding protein, cytoplasmic 1 b [Source:ZFIN;Acc:ZDB-GENE-050308-1]
ENSDARG00000051914	slc14a2	28.5157	2.0602	0.804614	2.56048	0.0104529	0.075671	solute carrier family 14 member 2 [Source:ZFIN;Acc:ZDB-GENE-030131-4833]
ENSDARG00000091348	rtn3	2694.38	0.604711	0.236251	2.55961	0.0104789	0.0758328	reticulon 3 [Source:ZFIN;Acc:ZDB-GENE-030710-5]
ENSDARG00000088274	si:ch211-181d7.1	60.5272	1.63892	0.640424	2.55912	0.0104937	0.0758856	si:ch211-181d7.1 [Source:ZFIN;Acc:ZDB-GENE-121214-14]
ENSDARG00000040492	mthfd1b	1912.04	0.814441	0.318328	2.55849	0.0105127	0.0759693	methylenetetrahydrofolate dehydrogenase (NADP+ dependent) 1b [Source:ZFIN;Acc:ZDB-GENE-020905-4]
ENSDARG00000074761	bicdl1	15.4729	3.35686	1.31381	2.55506	0.0106171	0.0764964	BICD family like cargo adaptor 1 [Source:NCBI gene;Acc:100537719]
ENSDARG00000095512	rca2.2	340.814	0.767844	0.300797	2.55269	0.0106893	0.0768101	regulator of complement activation group 2 gene 2 [Source:ZFIN;Acc:ZDB-GENE-060503-646]
ENSDARG00000045105	foxn2b	463.906	0.620612	0.243292	2.55089	0.0107448	0.0770583	forkhead box N2b [Source:ZFIN;Acc:ZDB-GENE-050417-1]
ENSDARG00000053959	cdc42ep2	47.9326	1.35605	0.532374	2.54717	0.01086	0.0776537	CDC42 effector protein (Rho GTPase binding) 2 [Source:ZFIN;Acc:ZDB-GENE-050320-104]
ENSDARG00000004141	0	2805.31	0.937614	0.368122	2.54702	0.0108648	0.0776607	zgc:92630 [Source:ZFIN;Acc:ZDB-GENE-040718-449]
ENSDARG00000004771	ankrd10b	429.619	0.603019	0.236916	2.54528	0.0109189	0.0780174	ankyrin repeat domain 10b [Source:ZFIN;Acc:ZDB-GENE-061013-49]
ENSDARG00000027082	hmbox1a	37.8503	1.23547	0.48554	2.54454	0.0109423	0.0780776	homeobox containing 1a [Source:ZFIN;Acc:ZDB-GENE-050913-89]
ENSDARG00000023040	zbtb1	147.335	0.765401	0.300864	2.54401	0.0109589	0.0781687	zinc finger and BTB domain containing 1 [Source:ZFIN;Acc:ZDB-GENE-041001-126]
ENSDARG00000018997	cplx2l	2207.94	1.25481	0.493362	2.54339	0.0109782	0.0782239	complexin 2, like [Source:ZFIN;Acc:ZDB-GENE-040718-160]
ENSDARG00000039264	igfbp5a	66.5476	2.89174	1.13701	2.54329	0.0109813	0.0782239	insulin-like growth factor binding protein 5a [Source:ZFIN;Acc:ZDB-GENE-070620-8]
ENSDARG00000098588	gchfr	471.669	1.22099	0.480148	2.54295	0.010992	0.0782472	GTP cyclohydrolase I feedback regulator [Source:NCBI gene;Acc:393735]
ENSDARG00000074684	mlsl	1126.62	0.881085	0.346841	2.54032	0.0110752	0.0786408	malate synthase-like [Source:ZFIN;Acc:ZDB-GENE-130530-761]
ENSDARG00000016048	gpat3	498.4	0.663097	0.261131	2.53933	0.0111066	0.0788091	glycerol-3-phosphate acyltransferase 3 [Source:NCBI gene;Acc:436958]
ENSDARG00000044541	ppp1r14ba	176.93	1.3968	0.550108	2.53914	0.0111125	0.0788232	protein phosphatase 1, regulatory (inhibitor) subunit 14Ba [Source:ZFIN;Acc:ZDB-GENE-060825-331]
ENSDARG00000031426	csrnp1a	452.726	2.29814	0.905396	2.53827	0.0111403	0.0789904	cysteine-serine-rich nuclear protein 1a [Source:ZFIN;Acc:ZDB-GENE-070912-475]
ENSDARG00000039900	si:ch73-168d20.1	29.8907	1.86792	0.736029	2.53784	0.011154	0.0790352	si:ch73-168d20.1 [Source:ZFIN;Acc:ZDB-GENE-121214-44]
ENSDARG00000075476	nlrp15	33.3506	2.48921	0.980956	2.53753	0.0111638	0.079059	NACHT, LRR and PYD domains-containing protein 15 [Source:ZFIN;Acc:ZDB-GENE-050208-473]
ENSDARG00000055270	si:ch1073-358c10.1	65.731	1.67772	0.661175	2.53749	0.0111651	0.079059	si:ch1073-358c10.1 [Source:ZFIN;Acc:ZDB-GENE-050309-123]
ENSDARG00000055349	pknox2	132.063	2.88694	1.13853	2.53566	0.0112236	0.0792803	pbx/knotted 1 homeobox 2 [Source:ZFIN;Acc:ZDB-GENE-031118-112]
ENSDARG00000061936	fbxo10	47.5571	0.88583	0.349768	2.53262	0.0113214	0.0797732	F-box protein 10 [Source:ZFIN;Acc:ZDB-GENE-090313-270]
ENSDARG00000104890	si:ch211-76m11.3	30.6452	1.56924	0.619762	2.53201	0.0113412	0.0798347	si:ch211-76m11.3 [Source:ZFIN;Acc:ZDB-GENE-041210-276]
ENSDARG00000069464	cox7a1	886.613	1.09203	0.431943	2.52818	0.0114656	0.0805156	cytochrome c oxidase subunit 7A1 [Source:ZFIN;Acc:ZDB-GENE-060929-340]
ENSDARG00000103038	pik3r3a	683.674	1.02487	0.405621	2.52667	0.0115149	0.0808146	phosphoinositide-3-kinase, regulatory subunit 3a (gamma) [Source:ZFIN;Acc:ZDB-GENE-040426-1978]
ENSDARG00000092150	FP085398.2	37.9174	1.00883	0.399583	2.52469	0.0115799	0.0810826	0
ENSDARG00000098142	CR391944.1	11.4702	2.13287	0.845552	2.52245	0.0116539	NA	gastrula zinc finger protein XlCGF7.1-like [Source:NCBI gene;Acc:108179097]
ENSDARG00000073718	si:ch73-233k15.2	213.958	1.17719	0.466696	2.52239	0.0116561	0.0815165	si:ch73-233k15.2 [Source:ZFIN;Acc:ZDB-GENE-120215-22]
ENSDARG00000104864	klhdc2	261.519	0.672416	0.266617	2.52203	0.0116681	0.081545	kelch domain containing 2 [Source:ZFIN;Acc:ZDB-GENE-070410-69]
ENSDARG00000045123	oplah	272.257	1.04181	0.413153	2.52161	0.0116818	0.0815848	5-oxoprolinase, ATP-hydrolysing [Source:ZFIN;Acc:ZDB-GENE-121214-293]
ENSDARG00000090401	CABZ01020840.1	161.162	0.806456	0.319937	2.52067	0.0117131	0.0817469	apoptosis facilitator Bcl-2-like protein 14 [Source:NCBI gene;Acc:101885512]
ENSDARG00000087994	si:ch211-114c17.1	48.7255	1.19935	0.476011	2.51958	0.0117494	0.0819446	si:ch211-114c17.1 [Source:ZFIN;Acc:ZDB-GENE-140106-201]
ENSDARG00000104108	slco1d1	3439.35	1.06122	0.422242	2.5133	0.0119609	0.0831706	solute carrier organic anion transporter family, member 1D1 [Source:ZFIN;Acc:ZDB-GENE-030131-5044]
ENSDARG00000006279	rragd	31.521	1.2589	0.501669	2.50942	0.0120929	0.0839384	ras-related GTP binding D [Source:ZFIN;Acc:ZDB-GENE-070620-6]
ENSDARG00000004635	epha7	183.695	1.10717	0.441289	2.50894	0.0121093	0.0840237	eph receptor A7 [Source:ZFIN;Acc:ZDB-GENE-030131-3745]
ENSDARG00000092257	BX510992.1	14.7762	1.51276	0.603117	2.50824	0.0121333	0.0841613	0
ENSDARG00000013371	isoc2	407.441	1.16557	0.464721	2.5081	0.0121381	0.0841662	isochorismatase domain containing 2 [Source:NCBI gene;Acc:492617]
ENSDARG00000098645	rgn	1213.45	0.775793	0.310274	2.50035	0.012407	0.0855364	regucalcin [Source:NCBI gene;Acc:403070]
ENSDARG00000096851	znf1143	69.941	0.738924	0.295616	2.49961	0.0124331	0.0856294	zinc finger protein 1143 [Source:ZFIN;Acc:ZDB-GENE-131125-17]
ENSDARG00000060319	scn4bb	77.8379	1.67614	0.670713	2.49904	0.012453	0.0857101	sodium channel, voltage-gated, type IV, beta b [Source:ZFIN;Acc:ZDB-GENE-031116-71]
ENSDARG00000086216	prr13	834.417	0.754498	0.30192	2.499	0.0124544	0.0857101	proline rich 13 [Source:ZFIN;Acc:ZDB-GENE-080709-1]
ENSDARG00000078094	lmf2a	78.884	0.702726	0.281587	2.4956	0.0125746	0.0863702	lipase maturation factor 2a [Source:ZFIN;Acc:ZDB-GENE-080723-47]
ENSDARG00000030237	pgrmc2	1212.99	0.611125	0.245034	2.49404	0.0126297	0.0867199	progesterone receptor membrane component 2 [Source:ZFIN;Acc:ZDB-GENE-040426-2102]
ENSDARG00000068663	zgc:152951	43.6329	1.62038	0.649768	2.49377	0.0126393	0.0867424	zgc:152951 [Source:ZFIN;Acc:ZDB-GENE-060929-416]
ENSDARG00000103130	BX571960.2	72.4438	1.65186	0.663224	2.49065	0.012751	0.0872878	0
ENSDARG00000052271	slc22a18	1041.68	0.596635	0.240071	2.48524	0.0129463	0.0882696	solute carrier family 22 member 18 [Source:ZFIN;Acc:ZDB-GENE-051120-165]
ENSDARG00000023583	coq9	723.237	0.819256	0.329867	2.48359	0.0130064	0.0885568	coenzyme Q9 homolog (S. cerevisiae) [Source:ZFIN;Acc:ZDB-GENE-061207-37]
ENSDARG00000098189	si:dkey-16p6.1	58.2338	1.00236	0.4036	2.48356	0.0130077	0.0885568	si:dkey-16p6.1 [Source:ZFIN;Acc:ZDB-GENE-081103-43]
ENSDARG00000026904	cbln13	432.137	1.84772	0.744582	2.48155	0.0130813	0.0889194	cerebellin 13 [Source:ZFIN;Acc:ZDB-GENE-070912-288]
ENSDARG00000060601	rgs7bpa	181.495	1.6207	0.653127	2.48144	0.0130852	0.0889194	regulator of G protein signaling 7 binding protein a [Source:NCBI gene;Acc:767669]
ENSDARG00000078172	CU984600.1	688.648	0.59209	0.238689	2.48059	0.0131165	0.0890723	prostaglandin F2 receptor inhibitor [Source:NCBI gene;Acc:101883373]
ENSDARG00000033138	lyrm2	94.9033	0.615401	0.248172	2.47973	0.0131481	0.0892274	LYR motif containing 2 [Source:NCBI gene;Acc:569076]
ENSDARG00000100394	lnpep	527.893	0.608768	0.245671	2.47798	0.0132128	0.0896372	leucyl/cystinyl aminopeptidase [Source:ZFIN;Acc:ZDB-GENE-030131-1534]
ENSDARG00000096597	si:ch1073-228b5.2	55.8836	0.891022	0.359616	2.4777	0.0132231	0.089677	si:ch1073-228b5.2 [Source:ZFIN;Acc:ZDB-GENE-121214-335]
ENSDARG00000044501	viml	85.5719	1.45145	0.586549	2.47456	0.0133399	0.0903188	vimentin like [Source:ZFIN;Acc:ZDB-GENE-040426-1743]
ENSDARG00000012776	smarca1	436.792	1.05574	0.426723	2.47405	0.013359	0.0903882	SWI/SNF related, matrix associated, actin dependent regulator of chromatin, subfamily a, member 1 [Source:ZFIN;Acc:ZDB-GENE-070705-296]
ENSDARG00000076787	angpt4	24.8896	1.72794	0.698541	2.47365	0.0133742	0.0904482	angiopoietin 4 [Source:ZFIN;Acc:ZDB-GENE-110104-1]
ENSDARG00000004588	sox4a	678.009	0.701591	0.283781	2.47229	0.0134249	0.0906838	SRY-box transcription factor 4a [Source:ZFIN;Acc:ZDB-GENE-030131-8290]
ENSDARG00000112993	efnb3a	52.3848	1.17225	0.474866	2.46859	0.0135647	0.091512	ephrin-B3a [Source:ZFIN;Acc:ZDB-GENE-100316-1]
ENSDARG00000062874	hcar1-3	37.965	1.44813	0.587158	2.46634	0.0136502	0.0919621	hydroxycarboxylic acid receptor 1-3 [Source:ZFIN;Acc:ZDB-GENE-081107-48]
ENSDARG00000069003	pcyox1l	329.327	0.91658	0.371769	2.46546	0.0136839	0.0920711	prenylcysteine oxidase 1 like [Source:ZFIN;Acc:ZDB-GENE-141212-302]
ENSDARG00000043451	cab39	145.312	0.604111	0.245198	2.46377	0.0137484	0.0923794	calcium binding protein 39 [Source:ZFIN;Acc:ZDB-GENE-040625-158]
ENSDARG00000040485	gsdmeb	149.589	1.16768	0.474517	2.46077	0.0138637	0.0930001	gasdermin Eb [Source:ZFIN;Acc:ZDB-GENE-030131-7662]
ENSDARG00000099257	si:ch73-119p20.1	1053.63	3.32347	1.35089	2.46021	0.0138855	0.0930857	si:ch73-119p20.1 [Source:ZFIN;Acc:ZDB-GENE-141216-395]
ENSDARG00000103129	nid1b	122.774	0.866348	0.352166	2.46006	0.0138915	0.0930956	nidogen 1b [Source:ZFIN;Acc:ZDB-GENE-070802-3]
ENSDARG00000036458	prlhr2b	4.40225	4.09337	1.66478	2.4588	0.01394	NA	prolactin releasing hormone receptor 2b [Source:ZFIN;Acc:ZDB-GENE-091117-9]
ENSDARG00000002299	arsh	226.235	0.783122	0.318576	2.4582	0.0139637	0.093446	arylsulfatase H [Source:ZFIN;Acc:ZDB-GENE-081104-120]
ENSDARG00000078102	psda	96.7606	1.1474	0.466899	2.4575	0.0139909	0.0935688	pleckstrin and Sec7 domain containing a [Source:ZFIN;Acc:ZDB-GENE-090313-44]
ENSDARG00000036186	mbpa	17345.5	3.21174	1.30696	2.45741	0.0139943	0.0935688	myelin basic protein a [Source:ZFIN;Acc:ZDB-GENE-030128-2]
ENSDARG00000019294	cbln8	16421	1.68687	0.686828	2.45604	0.0140479	0.0937024	cerebellin 8 [Source:ZFIN;Acc:ZDB-GENE-080204-13]
ENSDARG00000036415	glb1	335.783	0.593624	0.241712	2.45592	0.0140526	0.0937024	galactosidase, beta 1 [Source:ZFIN;Acc:ZDB-GENE-050410-9]
ENSDARG00000024017	mdga2a	183.321	2.44187	0.994516	2.45533	0.0140754	0.0938036	MAM domain containing glycosylphosphatidylinositol anchor 2a [Source:ZFIN;Acc:ZDB-GENE-030616-360]
ENSDARG00000088630	arhgef10la	155.374	1.32912	0.541542	2.45433	0.0141149	0.0940279	Rho guanine nucleotide exchange factor (GEF) 10-like a [Source:ZFIN;Acc:ZDB-GENE-120814-1]
ENSDARG00000100547	CR383680.1	7.26166	3.21849	1.31322	2.45084	0.0142524	NA	MAP7 domain-containing protein 1-like [Source:NCBI gene;Acc:103912069]
ENSDARG00000086980	mbd6	180.529	0.71924	0.293467	2.45083	0.0142526	0.0945829	methyl-CpG binding domain protein 6 [Source:ZFIN;Acc:ZDB-GENE-041027-3]
ENSDARG00000096527	BX548015.2	10.9111	2.51567	1.02681	2.44998	0.0142863	NA	0
ENSDARG00000089795	sertad4	153.675	1.19824	0.489122	2.44978	0.0142945	0.0947688	SERTA domain containing 4 [Source:ZFIN;Acc:ZDB-GENE-090313-199]
ENSDARG00000092467	si:ch73-46j18.5	4144.39	1.13687	0.464144	2.44938	0.0143101	0.094841	si:ch73-46j18.5 [Source:ZFIN;Acc:ZDB-GENE-030131-7892]
ENSDARG00000076182	stat1b	555.785	1.15692	0.472505	2.44849	0.0143457	0.0950154	signal transducer and activator of transcription 1b [Source:ZFIN;Acc:ZDB-GENE-030616-23]
ENSDARG00000104393	npr2	338.96	0.780859	0.319103	2.44704	0.0144034	0.0953322	natriuretic peptide receptor 2 [Source:ZFIN;Acc:ZDB-GENE-141030-2]
ENSDARG00000116271	BX470259.2	132.716	0.624923	0.255463	2.44624	0.0144356	0.0954554	wu:fc31d10 [Source:NCBI gene;Acc:795633]
ENSDARG00000052019	si:ch73-109d9.1	69.8325	0.834565	0.34139	2.44461	0.014501	0.0957331	si:ch73-109d9.1 [Source:ZFIN;Acc:ZDB-GENE-110411-256]
ENSDARG00000045596	rassf8a	98.4073	0.968313	0.39623	2.44382	0.0145328	0.0958429	Ras association domain family member 8a [Source:ZFIN;Acc:ZDB-GENE-091014-4]
ENSDARG00000097928	si:ch73-40a17.4	37.164	2.05097	0.839281	2.44373	0.0145365	0.0958429	si:ch73-40a17.4 [Source:ZFIN;Acc:ZDB-GENE-131127-71]
ENSDARG00000069186	cyp27a1.2	65.1492	1.13551	0.465526	2.43919	0.0147202	0.0967284	cytochrome P450, family 27, subfamily A, polypeptide 1, gene 2 [Source:ZFIN;Acc:ZDB-GENE-081104-511]
ENSDARG00000095464	gstt2	239.567	2.32754	0.954254	2.43912	0.0147229	0.0967284	glutathione S-transferase theta 2 [Source:NCBI gene;Acc:393493]
ENSDARG00000092162	mhc1zaa	465.095	0.603884	0.247615	2.43881	0.0147359	0.0967821	major histocompatibility complex class I ZAA [Source:ZFIN;Acc:ZDB-GENE-030916-1]
ENSDARG00000052341	sgcb	215.787	0.697046	0.285839	2.43859	0.0147445	0.0968076	sarcoglycan, beta (dystrophin-associated glycoprotein) [Source:ZFIN;Acc:ZDB-GENE-030131-6695]
ENSDARG00000056949	htr7a	29.6662	3.32801	1.36486	2.43836	0.0147542	0.09684	5-hydroxytryptamine (serotonin) receptor 7a [Source:ZFIN;Acc:ZDB-GENE-130530-666]
ENSDARG00000059349	homer2	197.682	0.731638	0.300079	2.43815	0.0147625	0.0968634	homer scaffold protein 2 [Source:ZFIN;Acc:ZDB-GENE-050522-417]
ENSDARG00000097871	si:ch1073-145m9.1	19.5486	1.50145	0.616121	2.43695	0.0148118	0.0971556	si:ch1073-145m9.1 [Source:ZFIN;Acc:ZDB-GENE-131127-570]
ENSDARG00000063150	nrxn2b	559.031	2.32634	0.95473	2.43664	0.0148242	0.0971748	neurexin 2b [Source:ZFIN;Acc:ZDB-GENE-070206-7]
ENSDARG00000098270	znf1053	4.12907	2.99453	1.22969	2.4352	0.0148837	NA	zinc finger protein 1053 [Source:ZFIN;Acc:ZDB-GENE-121214-1]
ENSDARG00000039215	arrb2a	212.213	0.842445	0.346011	2.43474	0.0149026	0.0975946	arrestin, beta 2a [Source:ZFIN;Acc:ZDB-GENE-030131-29]
ENSDARG00000079472	F2RL2	74.3106	2.00021	0.821857	2.43376	0.0149427	0.0977942	proteinase-activated receptor 3-like [Source:NCBI gene;Acc:100333265]
ENSDARG00000075930	adamts2	278.454	1.12047	0.460411	2.43363	0.0149484	0.0978003	ADAM metallopeptidase with thrombospondin type 1 motif, 2 [Source:ZFIN;Acc:ZDB-GENE-070816-3]
ENSDARG00000021324	nsun4	54.5046	0.769889	0.316377	2.43345	0.0149556	0.0978159	NOP2/Sun RNA methyltransferase 4 [Source:ZFIN;Acc:ZDB-GENE-041212-77]
ENSDARG00000078817	rnf165b	58.3261	0.832063	0.341992	2.43299	0.0149746	0.0978774	ring finger protein 165b [Source:ZFIN;Acc:ZDB-GENE-081104-369]
ENSDARG00000093401	crha	6.34284	2.6292	1.08095	2.4323	0.0150032	NA	corticotropin releasing hormone a [Source:ZFIN;Acc:ZDB-GENE-070912-371]
ENSDARG00000013477	gata1a	36.7833	1.87369	0.771101	2.42989	0.0151034	0.0985008	GATA binding protein 1a [Source:ZFIN;Acc:ZDB-GENE-980526-268]
ENSDARG00000100304	chdh	353.547	0.683728	0.281383	2.42988	0.0151038	0.0985008	choline dehydrogenase [Source:ZFIN;Acc:ZDB-GENE-120111-1]
ENSDARG00000099719	cdkn1d	563.669	1.60712	0.661527	2.4294	0.0151237	0.0985059	cyclin-dependent kinase inhibitor 1D [Source:ZFIN;Acc:ZDB-GENE-110215-1]
ENSDARG00000010981	zdhhc3a	83.6811	0.743321	0.306256	2.42713	0.015219	0.0989118	zinc finger DHHC-type containing 3a [Source:ZFIN;Acc:ZDB-GENE-040718-484]
ENSDARG00000036239	gatm	2003.09	1.40912	0.580695	2.42661	0.0152407	0.0989135	glycine amidinotransferase (L-arginine:glycine amidinotransferase) [Source:NCBI gene;Acc:266799]
ENSDARG00000087897	macroh2a2	1038.89	0.588019	0.242321	2.42661	0.0152407	0.0989135	macroH2A.2 histone [Source:ZFIN;Acc:ZDB-GENE-050913-114]
ENSDARG00000058730	rdh10a	345.283	0.876881	0.361371	2.42654	0.0152435	0.0989135	retinol dehydrogenase 10a [Source:NCBI gene;Acc:562840]
ENSDARG00000053066	tubb1	17.103	1.76911	0.729289	2.4258	0.0152749	0.0990152	tubulin, beta 1 class VI [Source:ZFIN;Acc:ZDB-GENE-110408-5]
ENSDARG00000041776	ndst3	168.75	3.20889	1.32311	2.42526	0.0152976	0.0990992	N-deacetylase/N-sulfotransferase (heparan glucosaminyl) 3 [Source:ZFIN;Acc:ZDB-GENE-090312-199]
ENSDARG00000099891	si:ch211-57n23.1	69.1517	1.05623	0.435574	2.4249	0.0153125	0.0991642	si:ch211-57n23.1 [Source:ZFIN;Acc:ZDB-GENE-141219-29]
ENSDARG00000058394	tagln3b	274.649	0.747245	0.308655	2.42097	0.0154791	0.0999099	transgelin 3b [Source:ZFIN;Acc:ZDB-GENE-030131-4199]
ENSDARG00000034714	esyt1a	78.3808	0.807983	0.333897	2.41986	0.0155266	0.100011	extended synaptotagmin-like protein 1a [Source:ZFIN;Acc:ZDB-GENE-090311-55]
ENSDARG00000015765	iah1	42.7081	1.05806	0.437407	2.41893	0.0155661	0.100202	isoamyl acetate hydrolyzing esterase 1 (putative) [Source:NCBI gene;Acc:449926]
ENSDARG00000071339	borcs8	85.3912	0.723436	0.299103	2.41869	0.0155767	0.100238	BLOC-1 related complex subunit 8 [Source:NCBI gene;Acc:558180]
ENSDARG00000094793	ovch2	6.93244	2.05064	0.84797	2.4183	0.0155934	NA	ovochymase 2 [Source:ZFIN;Acc:ZDB-GENE-061207-75]
ENSDARG00000006786	copz2	545.336	0.599594	0.248209	2.41568	0.0157057	0.100822	coatomer protein complex, subunit zeta 2 [Source:ZFIN;Acc:ZDB-GENE-000406-5]
ENSDARG00000093874	si:dkey-196j8.2	13.1811	3.01458	1.24834	2.41487	0.0157407	0.100848	si:dkey-196j8.2 [Source:ZFIN;Acc:ZDB-GENE-081107-58]
ENSDARG00000102387	slc39a14	44.4982	0.687024	0.284617	2.41386	0.0157847	0.100971	solute carrier family 39 member 14 [Source:NCBI gene;Acc:799782]
ENSDARG00000025436	msrb1a	380.555	0.856942	0.355146	2.41293	0.0158251	0.101071	methionine sulfoxide reductase B1a [Source:NCBI gene;Acc:352916]
ENSDARG00000091211	adh8a	5577.66	1.36047	0.564128	2.41163	0.0158815	0.101305	alcohol dehydrogenase 8a [Source:ZFIN;Acc:ZDB-GENE-030529-3]
ENSDARG00000029761	mpp6b	71.5642	0.829547	0.344052	2.41111	0.0159041	0.101417	membrane protein, palmitoylated 6b (MAGUK p55 subfamily member 6) [Source:ZFIN;Acc:ZDB-GENE-040426-775]
ENSDARG00000068460	otog	96.7439	1.04514	0.433501	2.41092	0.0159125	0.101439	otogelin [Source:ZFIN;Acc:ZDB-GENE-120228-1]
ENSDARG00000078179	fndc3ba	916.829	0.599105	0.24854	2.4105	0.0159307	0.101492	fibronectin type III domain containing 3Ba [Source:ZFIN;Acc:ZDB-GENE-070510-1]
ENSDARG00000075530	pigu	100.589	0.766085	0.317866	2.41009	0.0159486	0.101523	phosphatidylinositol glycan anchor biosynthesis, class U [Source:ZFIN;Acc:ZDB-GENE-100629-1]
ENSDARG00000099495	si:ch73-309g22.1	19.2724	3.33447	1.38357	2.41004	0.0159506	0.101523	si:ch73-309g22.1 [Source:ZFIN;Acc:ZDB-GENE-131127-401]
ENSDARG00000030417	pkd1a	105.779	0.830539	0.344982	2.40749	0.0160627	0.102205	polycystic kidney disease 1a [Source:ZFIN;Acc:ZDB-GENE-100707-1]
ENSDARG00000074708	armc3	58.3913	3.29159	1.36766	2.40674	0.0160957	0.102328	armadillo repeat containing 3 [Source:ZFIN;Acc:ZDB-GENE-110614-1]
ENSDARG00000116122	CABZ01067150.2	16.9793	1.42469	0.592325	2.40526	0.0161611	0.102671	0
ENSDARG00000087555	si:ch73-308l14.2	111.952	0.592741	0.246588	2.40377	0.016227	0.102961	si:ch73-308l14.2 [Source:ZFIN;Acc:ZDB-GENE-141219-12]
ENSDARG00000027572	as3mt	650.885	0.789318	0.328566	2.40231	0.0162919	0.103212	arsenite methyltransferase [Source:ZFIN;Acc:ZDB-GENE-060312-15]
ENSDARG00000099775	CABZ01074307.1	112.404	2.13839	0.890965	2.40008	0.0163914	0.103778	0
ENSDARG00000058221	ugcg	285.277	0.719183	0.299685	2.3998	0.0164041	0.103809	UDP-glucose ceramide glucosyltransferase [Source:ZFIN;Acc:ZDB-GENE-030131-9885]
ENSDARG00000068493	cyp2y3	80.2562	1.55023	0.646283	2.39869	0.0164538	0.10398	cytochrome P450, family 2, subfamily Y, polypeptide 3 [Source:ZFIN;Acc:ZDB-GENE-050522-490]
ENSDARG00000095047	si:dkey-85k15.4	21.4818	1.94178	0.809653	2.39829	0.016472	0.10403	si:dkey-85k15.4 [Source:ZFIN;Acc:ZDB-GENE-100922-242]
ENSDARG00000004402	elovl6	2495.36	1.25046	0.521708	2.39686	0.0165362	0.104217	ELOVL fatty acid elongase 6 [Source:NCBI gene;Acc:317738]
ENSDARG00000079089	fbxw8	200.181	0.594441	0.248024	2.39671	0.0165429	0.104217	F-box and WD repeat domain containing 8 [Source:NCBI gene;Acc:100136859]
ENSDARG00000098514	si:ch211-59d8.3	24.1347	1.52432	0.636033	2.39661	0.0165475	0.104217	si:ch211-59d8.3 [Source:ZFIN;Acc:ZDB-GENE-120709-11]
ENSDARG00000056842	usp30	62.2438	0.930842	0.388708	2.3947	0.0166338	0.104663	ubiquitin specific peptidase 30 [Source:NCBI gene;Acc:559099]
ENSDARG00000014727	acox1	4249.29	0.880519	0.368045	2.39242	0.0167376	0.105219	acyl-CoA oxidase 1, palmitoyl [Source:ZFIN;Acc:ZDB-GENE-041010-219]
ENSDARG00000059700	agmat	509.957	1.21193	0.507424	2.38841	0.0169217	0.106094	agmatine ureohydrolase (agmatinase) [Source:ZFIN;Acc:ZDB-GENE-060929-696]
ENSDARG00000018637	sec61g	1498.24	0.718265	0.300735	2.38836	0.0169236	0.106094	SEC61 translocon gamma subunit [Source:ZFIN;Acc:ZDB-GENE-040718-203]
ENSDARG00000021443	zfp36l1b	2912.82	0.758945	0.317849	2.38775	0.0169519	0.106173	zinc finger protein 36, C3H type-like 1b [Source:ZFIN;Acc:ZDB-GENE-030131-2391]
ENSDARG00000099238	rasd4	122.474	3.25517	1.36361	2.38717	0.0169787	0.106308	rasd family member 4 [Source:ZFIN;Acc:ZDB-GENE-050506-133]
ENSDARG00000101185	CABZ01095001.1	33.9209	3.59219	1.5053	2.38636	0.0170161	0.106477	0
ENSDARG00000101701	bmp5	58.394	1.8457	0.77366	2.38568	0.0170477	0.106641	bone morphogenetic protein 5 [Source:ZFIN;Acc:ZDB-GENE-040426-1413]
ENSDARG00000096569	BX248418.1	24.9376	1.96616	0.82419	2.38557	0.0170527	0.106641	0
ENSDARG00000086421	si:ch211-212k18.8	102.868	0.768286	0.32221	2.38443	0.0171056	0.106895	si:ch211-212k18.8 [Source:ZFIN;Acc:ZDB-GENE-041111-14]
ENSDARG00000100388	abhd5b	19.3038	3.21206	1.34845	2.38204	0.0172169	0.107275	abhydrolase domain containing 5b [Source:ZFIN;Acc:ZDB-GENE-110411-277]
ENSDARG00000077138	zgc:195173	1467.18	0.65936	0.276947	2.38081	0.0172746	0.107468	zgc:195173 [Source:ZFIN;Acc:ZDB-GENE-081022-190]
ENSDARG00000016718	mmp11b	20.6462	1.51615	0.637746	2.37736	0.0174372	0.108019	matrix metallopeptidase 11b [Source:ZFIN;Acc:ZDB-GENE-070817-2]
ENSDARG00000097507	BX324164.4	18.0639	3.19919	1.34591	2.37697	0.0174553	0.108098	0
ENSDARG00000060862	atxn1b	471.779	1.09195	0.45943	2.37675	0.0174658	0.10813	ataxin 1b [Source:ZFIN;Acc:ZDB-GENE-061218-2]
ENSDARG00000016213	zmp:0000001048	13.2448	3.32582	1.40091	2.37404	0.0175944	0.108653	zmp:0000001048 [Source:ZFIN;Acc:ZDB-GENE-140106-8]
ENSDARG00000016457	irf9	392.6	0.60169	0.253468	2.37383	0.0176045	0.108653	interferon regulatory factor 9 [Source:ZFIN;Acc:ZDB-GENE-040912-165]
ENSDARG00000043081	ctsz	5787.61	0.586856	0.247306	2.373	0.0176443	0.108839	cathepsin Z [Source:ZFIN;Acc:ZDB-GENE-041010-139]
ENSDARG00000075083	prkdc	345.398	0.629051	0.265117	2.37273	0.0176573	0.108878	protein kinase, DNA-activated, catalytic subunit [Source:ZFIN;Acc:ZDB-GENE-030131-9008]
ENSDARG00000037570	polr1d	74.076	0.705476	0.297339	2.37263	0.017662	0.108878	RNA polymerase I and III subunit D [Source:NCBI gene;Acc:445412]
ENSDARG00000042172	c7a	328.85	0.894169	0.377438	2.36905	0.0178341	0.109582	complement component 7a [Source:ZFIN;Acc:ZDB-GENE-081104-392]
ENSDARG00000035257	akr1a1a	1314.26	1.26866	0.535627	2.36855	0.0178579	0.109692	aldo-keto reductase family 1, member A1a (aldehyde reductase) [Source:NCBI gene;Acc:445326]
ENSDARG00000098214	CABZ01072487.1	69.5858	0.762155	0.322146	2.36587	0.0179879	0.110324	0
ENSDARG00000098440	si:ch211-62a1.4	4.15459	3.99951	1.69069	2.3656	0.0180007	NA	si:ch211-62a1.4 [Source:ZFIN;Acc:ZDB-GENE-141222-41]
ENSDARG00000037738	fbxl3l	28.5538	1.91539	0.809741	2.36544	0.0180088	0.110386	F-box and leucine-rich repeat protein 3, like [Source:ZFIN;Acc:ZDB-GENE-130530-598]
ENSDARG00000058470	mapk13	226.915	0.630929	0.266773	2.36505	0.0180278	0.110469	mitogen-activated protein kinase 13 [Source:ZFIN;Acc:ZDB-GENE-041111-17]
ENSDARG00000026655	tspo	512.018	0.664478	0.280998	2.36471	0.0180444	0.110537	translocator protein [Source:ZFIN;Acc:ZDB-GENE-041010-125]
ENSDARG00000025703	dmgdh	1270.05	0.72366	0.306186	2.36347	0.0181048	0.110808	dimethylglycine dehydrogenase [Source:ZFIN;Acc:ZDB-GENE-080227-8]
ENSDARG00000117609	CABZ01079281.1	1332.26	1.26478	0.535364	2.36247	0.0181537	0.11104	0
ENSDARG00000090973	si:dkey-264d12.1	21.8174	1.2158	0.514755	2.3619	0.0181814	0.111076	si:dkey-264d12.1 [Source:ZFIN;Acc:ZDB-GENE-141215-69]
ENSDARG00000040555	bckdha	721.737	0.593024	0.251356	2.3593	0.0183097	0.111793	branched chain keto acid dehydrogenase E1 subunit alpha [Source:ZFIN;Acc:ZDB-GENE-050522-376]
ENSDARG00000088222	fam78ab	35.8057	1.30583	0.553695	2.35839	0.0183546	0.111967	family with sequence similarity 78 member Ab [Source:ZFIN;Acc:ZDB-GENE-080220-25]
ENSDARG00000045753	tmtc2a	100.065	0.945661	0.401115	2.35758	0.0183943	0.112105	transmembrane O-mannosyltransferase targeting cadherins 2a [Source:ZFIN;Acc:ZDB-GENE-041210-299]
ENSDARG00000069241	ttc32	105.891	0.767762	0.3259	2.35582	0.0184817	0.112373	tetratricopeptide repeat domain 32 [Source:ZFIN;Acc:ZDB-GENE-041014-158]
ENSDARG00000109392	FO681393.1	1.99782	3.91255	1.66225	2.35377	0.0185843	NA	0
ENSDARG00000104758	zgc:194981	67.171	0.955092	0.406303	2.35069	0.0187386	0.113596	zgc:194981 [Source:ZFIN;Acc:ZDB-GENE-081022-170]
ENSDARG00000104883	PCMTD2	96.1322	0.89917	0.382758	2.34919	0.0188145	0.113887	protein-L-isoaspartate O-methyltransferase domain-containing protein 2-like [Source:NCBI gene;Acc:100536777]
ENSDARG00000015537	gad2	2899.19	2.62958	1.11953	2.34883	0.0188324	0.113961	glutamate decarboxylase 2 [Source:ZFIN;Acc:ZDB-GENE-030909-9]
ENSDARG00000015065	c4	6858.88	0.784343	0.333966	2.34857	0.0188454	0.114006	complement component 4 [Source:ZFIN;Acc:ZDB-GENE-030131-5697]
ENSDARG00000034605	zgc:153169	102.091	0.680515	0.28984	2.3479	0.0188797	0.11418	zgc:153169 [Source:ZFIN;Acc:ZDB-GENE-060929-764]
ENSDARG00000103498	epd	37710.8	1.737	0.740748	2.34492	0.019031	0.114958	ependymin [Source:NCBI gene;Acc:30199]
ENSDARG00000108060	LO017771.1	153.005	0.6668	0.284456	2.34412	0.0190718	0.115102	0
ENSDARG00000086786	mfsd10	173.234	0.666999	0.284638	2.34333	0.0191127	0.115247	major facilitator superfamily domain containing 10 [Source:ZFIN;Acc:ZDB-GENE-050417-154]
ENSDARG00000079456	si:ch211-149a19.3	55.222	1.6723	0.713814	2.34277	0.0191411	0.115384	si:ch211-149a19.3 [Source:ZFIN;Acc:ZDB-GENE-081104-128]
ENSDARG00000116112	AL954146.3	109.224	1.15366	0.492618	2.3419	0.0191856	0.11555	0
ENSDARG00000010097	f9a	533.981	1.07851	0.460623	2.34142	0.0192106	0.115632	coagulation factor IXa [Source:ZFIN;Acc:ZDB-GENE-030714-2]
ENSDARG00000116862	pimr64	24.5528	1.73755	0.742287	2.34081	0.0192421	0.115719	Pim proto-oncogene, serine/threonine kinase, related 64 [Source:ZFIN;Acc:ZDB-GENE-091113-46]
ENSDARG00000088581	f10	5549.74	0.737493	0.315075	2.34069	0.0192483	0.115722	coagulation factor X [Source:ZFIN;Acc:ZDB-GENE-021206-9]
ENSDARG00000005186	sp4	257.927	0.650412	0.277972	2.33985	0.0192914	0.115879	sp4 transcription factor [Source:ZFIN;Acc:ZDB-GENE-031202-3]
ENSDARG00000042122	acot11b	63.5137	1.28009	0.547463	2.33823	0.0193756	0.116316	acyl-CoA thioesterase 11b [Source:ZFIN;Acc:ZDB-GENE-051127-37]
ENSDARG00000096602	si:ch1073-357b18.4	89.8857	0.740097	0.316544	2.33805	0.0193845	0.11632	si:ch1073-357b18.4 [Source:ZFIN;Acc:ZDB-GENE-121214-213]
ENSDARG00000075670	rereb	486.585	0.588728	0.252297	2.33347	0.0196232	0.117561	arginine-glutamic acid dipeptide (RE) repeats b [Source:ZFIN;Acc:ZDB-GENE-070212-3]
ENSDARG00000052515	calcoco2	806.749	0.825041	0.353605	2.33323	0.0196362	0.117572	calcium binding and coiled-coil domain 2 [Source:ZFIN;Acc:ZDB-GENE-050522-346]
ENSDARG00000068726	masp1	251.861	0.966332	0.415273	2.32698	0.0199663	0.119301	mannan-binding lectin serine peptidase 1 [Source:ZFIN;Acc:ZDB-GENE-110421-4]
ENSDARG00000095300	mxra7	106.159	0.917447	0.39433	2.3266	0.0199868	0.119388	matrix-remodelling associated 7 [Source:ZFIN;Acc:ZDB-GENE-041014-95]
ENSDARG00000018809	abhd3	625.499	0.795115	0.341818	2.32614	0.0200113	0.1195	abhydrolase domain containing 3 [Source:ZFIN;Acc:ZDB-GENE-040912-90]
ENSDARG00000069157	tmem135	842.257	0.912676	0.39244	2.32565	0.0200374	0.119585	transmembrane protein 135 [Source:ZFIN;Acc:ZDB-GENE-070424-70]
ENSDARG00000101759	homer1b	472.336	1.9647	0.845279	2.32432	0.0201086	0.119905	homer scaffold protein 1b [Source:ZFIN;Acc:ZDB-GENE-040801-44]
ENSDARG00000031761	dab2	971.003	0.917592	0.395341	2.32101	0.0202862	0.120717	DAB adaptor protein 2 [Source:ZFIN;Acc:ZDB-GENE-040303-1]
ENSDARG00000016415	dhtkd1	1132.36	0.812682	0.350467	2.31885	0.0204031	0.12126	dehydrogenase E1 and transketolase domain containing 1 [Source:NCBI gene;Acc:494076]
ENSDARG00000055381	bambia	442.565	0.617747	0.266412	2.31876	0.0204079	0.12126	BMP and activin membrane-bound inhibitor (Xenopus laevis) homolog a [Source:ZFIN;Acc:ZDB-GENE-010416-1]
ENSDARG00000098691	CT583672.1	184.913	0.619	0.267047	2.31795	0.0204523	0.121386	0
ENSDARG00000069954	kcnq5a	38.8258	1.18518	0.511544	2.31687	0.020511	0.121664	potassium voltage-gated channel, KQT-like subfamily, member 5a [Source:ZFIN;Acc:ZDB-GENE-090312-185]
ENSDARG00000083412	CU861451.1	18.6666	1.84167	0.795468	2.3152	0.0206021	0.121992	0
ENSDARG00000097391	si:dkey-33c14.7	8.31946	1.60985	0.695843	2.31352	0.0206939	NA	si:dkey-33c14.7 [Source:ZFIN;Acc:ZDB-GENE-131127-528]
ENSDARG00000090638	gp9	26.8871	1.55451	0.672001	2.31325	0.0207088	0.122339	glycoprotein IX (platelet) [Source:ZFIN;Acc:ZDB-GENE-090313-5]
ENSDARG00000105112	ntn1a	172.404	1.04674	0.45252	2.31313	0.0207155	0.122343	netrin 1a [Source:ZFIN;Acc:ZDB-GENE-990415-169]
ENSDARG00000102777	thbs4a	122.146	2.4007	1.03865	2.31138	0.0208121	0.122796	thrombospondin 4a [Source:ZFIN;Acc:ZDB-GENE-080215-11]
ENSDARG00000053003	slc35f1	128.724	0.998703	0.432205	2.31071	0.0208487	0.122861	solute carrier family 35 member F1 [Source:ZFIN;Acc:ZDB-GENE-060503-463]
ENSDARG00000035808	clcn4	616.575	0.850189	0.368176	2.30919	0.0209328	0.123175	chloride channel, voltage-sensitive 4 [Source:ZFIN;Acc:ZDB-GENE-061013-353]
ENSDARG00000097761	BX005234.1	21.5499	1.28577	0.557115	2.30791	0.0210044	0.12337	0
ENSDARG00000002197	pygl	3882.03	1.30513	0.565565	2.30766	0.0210179	0.123414	phosphorylase, glycogen, liver [Source:ZFIN;Acc:ZDB-GENE-041205-1]
ENSDARG00000026484	rab15	168.433	3.04368	1.31919	2.30723	0.0210422	0.123449	RAB15, member RAS oncogene family [Source:ZFIN;Acc:ZDB-GENE-040718-2]
ENSDARG00000058646	ptprna	893.821	1.52526	0.661125	2.30707	0.0210512	0.123449	protein tyrosine phosphatase receptor type Na [Source:ZFIN;Acc:ZDB-GENE-030131-3511]
ENSDARG00000100402	fgd1	139.037	0.812307	0.352103	2.30701	0.0210541	0.123449	FYVE, RhoGEF and PH domain containing 1 [Source:ZFIN;Acc:ZDB-GENE-081104-33]
ENSDARG00000074581	add2	356.05	1.401	0.607614	2.30574	0.021125	0.123732	adducin 2 (beta) [Source:ZFIN;Acc:ZDB-GENE-080718-4]
ENSDARG00000062955	dipk1aa	190.465	0.614607	0.266602	2.30534	0.0211476	0.123819	divergent protein kinase domain 1Aa [Source:NCBI gene;Acc:678606]
ENSDARG00000052907	bcl7a	221.708	0.698147	0.302915	2.30477	0.0211797	0.123911	BAF chromatin remodeling complex subunit BCL7A [Source:NCBI gene;Acc:57952]
ENSDARG00000077794	CU468012.1	20.7022	1.68703	0.731984	2.30474	0.0211814	0.123911	0
ENSDARG00000053542	kctd12.2	381.544	0.606823	0.263357	2.30418	0.0212124	0.124021	potassium channel tetramerisation domain containing 12.2 [Source:ZFIN;Acc:ZDB-GENE-060117-4]
ENSDARG00000093774	rbp2b	2548.03	1.62343	0.704718	2.30365	0.0212421	0.124087	retinol binding protein 2b, cellular [Source:ZFIN;Acc:ZDB-GENE-040715-7]
ENSDARG00000110192	CABZ01081535.1	37.619	0.776311	0.337277	2.3017	0.0213519	0.124586	utrophin-like [Source:NCBI gene;Acc:103909931]
ENSDARG00000002174	itfg2	93.8943	0.597157	0.259646	2.29989	0.0214545	0.125006	integrin alpha FG-GAP repeat containing 2 [Source:ZFIN;Acc:ZDB-GENE-041008-161]
ENSDARG00000009252	napepld	212.516	0.639049	0.278024	2.29854	0.021531	0.125274	N-acyl phosphatidylethanolamine phospholipase D [Source:ZFIN;Acc:ZDB-GENE-030131-3856]
ENSDARG00000020427	nceh1a	115.596	1.10198	0.479426	2.29854	0.0215312	0.125274	neutral cholesterol ester hydrolase 1a [Source:ZFIN;Acc:ZDB-GENE-040711-2]
ENSDARG00000037587	SYNPR	62.5467	3.35146	1.45829	2.29821	0.0215496	0.125345	si:dkey-30j16.3 [Source:ZFIN;Acc:ZDB-GENE-141212-294]
ENSDARG00000101514	ftr64	43.0609	1.19612	0.521273	2.29462	0.0217549	0.126288	finTRIM family, member 64 [Source:ZFIN;Acc:ZDB-GENE-090508-8]
ENSDARG00000036940	ctss1	31.132	1.68344	0.733731	2.29436	0.02177	0.126339	cathepsin S, ortholog 1 [Source:ZFIN;Acc:ZDB-GENE-040426-1583]
ENSDARG00000022045	map1ab	2832.01	3.03953	1.32519	2.29365	0.0218103	0.126501	microtubule-associated protein 1Ab [Source:ZFIN;Acc:ZDB-GENE-100426-3]
ENSDARG00000116177	znf1127	5.84303	1.98448	0.865272	2.29348	0.0218204	NA	zinc finger protein 1127 [Source:ZFIN;Acc:ZDB-GENE-110914-37]
ENSDARG00000034572	gpr143	52.5953	3.06355	1.33709	2.29121	0.0219513	0.12703	G protein-coupled receptor 143 [Source:ZFIN;Acc:ZDB-GENE-040426-1476]
ENSDARG00000079930	si:dkeyp-68b7.5	19.7627	1.46116	0.638414	2.28873	0.022095	0.127651	si:dkeyp-68b7.5 [Source:ZFIN;Acc:ZDB-GENE-070912-670]
ENSDARG00000077818	nrg2a	62.7596	0.895966	0.391573	2.28812	0.0221305	0.127813	neuregulin 2a [Source:ZFIN;Acc:ZDB-GENE-070615-10]
ENSDARG00000079416	zgc:174895	39.3136	1.07796	0.471175	2.2878	0.0221489	0.127823	zgc:174895 [Source:ZFIN;Acc:ZDB-GENE-070928-41]
ENSDARG00000104436	zgc:153426	1112.23	2.6806	1.17261	2.28601	0.0222537	0.12827	zgc:153426 [Source:ZFIN;Acc:ZDB-GENE-060929-220]
ENSDARG00000100940	nr5a2	371.695	0.684156	0.299297	2.28588	0.0222614	0.128278	nuclear receptor subfamily 5, group A, member 2 [Source:ZFIN;Acc:ZDB-GENE-990415-79]
ENSDARG00000015662	pla2g12b	4623.02	1.42824	0.625019	2.28511	0.0223063	0.128428	phospholipase A2, group XIIB [Source:ZFIN;Acc:ZDB-GENE-040426-2771]
ENSDARG00000116814	CU570894.2	55.0019	0.80383	0.351822	2.28476	0.0223269	0.128474	0
ENSDARG00000097693	si:ch211-248a14.8	1246.4	1.11654	0.488985	2.28339	0.0224076	0.128793	si:ch211-248a14.8 [Source:ZFIN;Acc:ZDB-GENE-131126-33]
ENSDARG00000103760	cfhl2	1912.07	1.60131	0.701416	2.28297	0.0224321	0.128861	complement factor H like 2 [Source:ZFIN;Acc:ZDB-GENE-041114-123]
ENSDARG00000115781	CR339041.3	15.8769	1.37481	0.602709	2.28104	0.0225458	0.129332	0
ENSDARG00000099597	si:dkey-211i20.5	9.95162	3.12115	1.36884	2.28014	0.0225995	NA	si:dkey-211i20.5 [Source:ZFIN;Acc:ZDB-GENE-120709-55]
ENSDARG00000102080	mif4gda	42.364	1.28005	0.561401	2.2801	0.0226015	0.129579	MIF4G domain containing a [Source:NCBI gene;Acc:393355]
ENSDARG00000117659	CABZ01079280.1	32.0027	1.9297	0.846512	2.27958	0.0226323	0.129719	0
ENSDARG00000104200	BX901923.2	256.659	1.18361	0.519383	2.27887	0.0226747	0.129881	alpha-2-macroglobulin-like protein 1 [Source:NCBI gene;Acc:407643]
ENSDARG00000045144	zgc:163057	26.7062	1.92562	0.845425	2.2777	0.0227446	0.130034	zgc:163057 [Source:ZFIN;Acc:ZDB-GENE-070410-131]
ENSDARG00000069280	tsen15	93.4396	0.824739	0.362134	2.27744	0.0227599	0.130085	TSEN15 tRNA splicing endonuclease subunit [Source:ZFIN;Acc:ZDB-GENE-041008-211]
ENSDARG00000068175	ing5b	37.1761	1.37001	0.601687	2.27694	0.0227895	0.13021	inhibitor of growth family, member 5b [Source:ZFIN;Acc:ZDB-GENE-030616-462]
ENSDARG00000093518	CT573204.1	3.38709	3.84949	1.69066	2.27691	0.0227917	NA	si:dkey-184n3.2 [Source:NCBI gene;Acc:100320750]
ENSDARG00000112431	LO018598.1	77.3766	1.12861	0.495687	2.27686	0.0227947	0.13021	0
ENSDARG00000042054	zgc:171971	66.9046	1.02159	0.448779	2.27637	0.0228236	0.130306	zgc:171971 [Source:ZFIN;Acc:ZDB-GENE-070928-37]
ENSDARG00000062397	ndst1a	234.697	1.75455	0.770907	2.27596	0.0228483	0.130408	N-deacetylase/N-sulfotransferase (heparan glucosaminyl) 1a [Source:ZFIN;Acc:ZDB-GENE-111012-2]
ENSDARG00000105046	ccnf	130.147	2.00282	0.880401	2.27489	0.0229125	0.130664	cyclin F [Source:NCBI gene;Acc:266981]
ENSDARG00000105079	BX649411.2	37.358	1.57829	0.693856	2.27466	0.0229263	0.13067	0
ENSDARG00000060569	tmem229b	150.692	1.10203	0.48462	2.274	0.0229657	0.130714	transmembrane protein 229B [Source:NCBI gene;Acc:767735]
ENSDARG00000059707	0	256.3	0.716856	0.315255	2.27389	0.0229726	0.130714	si:ch211-216l23.1 [Source:NCBI gene;Acc:566696]
ENSDARG00000070029	ehhadh	1764	1.19124	0.524003	2.27335	0.0230049	0.130861	enoyl-CoA, hydratase/3-hydroxyacyl CoA dehydrogenase [Source:NCBI gene;Acc:100000859]
ENSDARG00000057984	eps8l1a	111.914	1.10559	0.486547	2.27231	0.0230676	0.131109	eps8 like 1a [Source:ZFIN;Acc:ZDB-GENE-050306-14]
ENSDARG00000108372	LO017648.1	12.4913	3.39796	1.49673	2.27025	0.0231924	NA	0
ENSDARG00000095675	ccdc141	113.088	0.897924	0.395644	2.26952	0.0232365	0.131738	coiled-coil domain containing 141 [Source:ZFIN;Acc:ZDB-GENE-081104-472]
ENSDARG00000011376	dnase1l4.2	376.755	0.686652	0.302574	2.26937	0.023246	0.131742	deoxyribonuclease 1 like 4, tandem duplicate 2 [Source:ZFIN;Acc:ZDB-GENE-040426-1884]
ENSDARG00000092071	si:ch211-117n7.6	639.537	1.32076	0.582014	2.2693	0.0232502	0.131742	si:ch211-117n7.6 [Source:ZFIN;Acc:ZDB-GENE-060503-474]
ENSDARG00000094132	igf1	473.261	1.12067	0.494444	2.26653	0.023419	0.132441	insulin-like growth factor 1 [Source:ZFIN;Acc:ZDB-GENE-010607-2]
ENSDARG00000058445	zgc:136472	847.629	1.3293	0.586705	2.2657	0.0234695	0.13258	zgc:136472 [Source:ZFIN;Acc:ZDB-GENE-060421-2552]
ENSDARG00000074052	si:ch211-281g13.5	49.1422	1.37421	0.606643	2.26526	0.0234965	0.132659	si:ch211-281g13.5 [Source:ZFIN;Acc:ZDB-GENE-090311-7]
ENSDARG00000070903	met	414.632	0.683124	0.301728	2.26404	0.0235719	0.132947	MET proto-oncogene, receptor tyrosine kinase [Source:ZFIN;Acc:ZDB-GENE-041014-1]
ENSDARG00000076277	CR385050.1	5.80613	3.31559	1.46584	2.26191	0.0237033	NA	0
ENSDARG00000104068	gstp1	6441.69	0.81335	0.360135	2.25846	0.0239171	0.134405	glutathione S-transferase pi 1 [Source:ZFIN;Acc:ZDB-GENE-020806-4]
ENSDARG00000068738	cox5b2	2303.68	0.765376	0.339121	2.25694	0.0240116	0.134821	cytochrome c oxidase subunit 5B2 [Source:ZFIN;Acc:ZDB-GENE-060825-71]
ENSDARG00000091101	fabp10b	30.396	1.46228	0.648254	2.25573	0.0240878	0.135211	fatty acid binding protein 10b, liver basic [Source:ZFIN;Acc:ZDB-GENE-100217-2]
ENSDARG00000075641	steap3	6.20125	2.28249	1.01333	2.25247	0.0242929	NA	STEAP family member 3, metalloreductase [Source:ZFIN;Acc:ZDB-GENE-081104-268]
ENSDARG00000057378	selenou1a	1054.95	0.689548	0.306208	2.2519	0.0243288	0.136264	Danio rerio selenoprotein U 1a (selenou1a), transcript variant 2, mRNA. [Source:RefSeq mRNA;Acc:NM_001354552]
ENSDARG00000008098	ifit9	28.0828	2.24122	0.995438	2.25149	0.0243544	0.136321	interferon-induced protein with tetratricopeptide repeats 9 [Source:ZFIN;Acc:ZDB-GENE-121214-233]
ENSDARG00000079293	gdpd4b	54.2799	0.771992	0.342959	2.25097	0.0243872	0.136441	glycerophosphodiester phosphodiesterase domain containing 4b [Source:ZFIN;Acc:ZDB-GENE-050309-133]
ENSDARG00000060120	glyctk	510.082	0.635416	0.282629	2.24824	0.0245612	0.137016	glycerate kinase [Source:NCBI gene;Acc:570678]
ENSDARG00000002355	shpk	35.1684	0.770154	0.342579	2.2481	0.0245695	0.137016	sedoheptulokinase [Source:ZFIN;Acc:ZDB-GENE-060526-357]
ENSDARG00000090824	si:dkey-51d8.3	7.97874	2.7624	1.22932	2.2471	0.0246335	NA	si:dkey-51d8.3 [Source:ZFIN;Acc:ZDB-GENE-081103-8]
ENSDARG00000091253	smyd1b	114.128	3.00665	1.33899	2.24545	0.024739	0.137767	SET and MYND domain containing 1b [Source:ZFIN;Acc:ZDB-GENE-060522-1]
ENSDARG00000040445	si:ch211-219a4.3	1153.58	0.857729	0.382118	2.24467	0.0247894	0.137961	si:ch211-219a4.3 [Source:ZFIN;Acc:ZDB-GENE-070424-157]
ENSDARG00000033144	psme2	1350.75	0.595415	0.265266	2.2446	0.0247941	0.137961	proteasome activator subunit 2 [Source:ZFIN;Acc:ZDB-GENE-991110-16]
ENSDARG00000102234	si:ch211-71n6.4	223.524	0.75784	0.337656	2.24442	0.0248057	0.137987	si:ch211-71n6.4 [Source:ZFIN;Acc:ZDB-GENE-091204-213]
ENSDARG00000103450	BX005085.3	43.7641	0.87533	0.390222	2.24316	0.0248865	0.138285	0
ENSDARG00000032431	mpv17	58.3976	0.797356	0.35557	2.24247	0.0249308	0.138382	mitochondrial inner membrane protein MPV17 [Source:NCBI gene;Acc:394140]
ENSDARG00000001950	ak1	2671.17	0.632462	0.282057	2.24232	0.0249406	0.138382	adenylate kinase 1 [Source:ZFIN;Acc:ZDB-GENE-040822-37]
ENSDARG00000002754	pdcd2l	85.1176	0.760446	0.339142	2.24226	0.0249444	0.138382	programmed cell death 2-like [Source:ZFIN;Acc:ZDB-GENE-040426-967]
ENSDARG00000101362	mibp	458.429	1.17718	0.525126	2.24171	0.0249799	0.138503	muscle-specific beta 1 integrin binding protein [Source:ZFIN;Acc:ZDB-GENE-030404-1]
ENSDARG00000005560	ywhah	1746.52	0.769179	0.343543	2.23896	0.0251587	0.139267	tyrosine 3-monooxygenase/tryptophan 5-monooxygenase activation protein, eta polypeptide [Source:ZFIN;Acc:ZDB-GENE-040426-2191]
ENSDARG00000019709	rhoua	253.961	0.769089	0.343554	2.23862	0.0251805	0.13935	ras homolog family member Ua [Source:ZFIN;Acc:ZDB-GENE-040618-3]
ENSDARG00000018459	msrb2	1136.55	1.37201	0.613341	2.23694	0.0252901	0.139657	methionine sulfoxide reductase B2 [Source:NCBI gene;Acc:405857]
ENSDARG00000088689	si:ch211-201o1.1	270.886	1.07016	0.478426	2.23683	0.0252975	0.139657	si:ch211-201o1.1 [Source:ZFIN;Acc:ZDB-GENE-120709-60]
ENSDARG00000076302	dtx4a	241.383	1.14023	0.510852	2.23202	0.0256138	0.140831	deltex 4, E3 ubiquitin ligase a [Source:ZFIN;Acc:ZDB-GENE-160728-59]
ENSDARG00000089860	atxn7l1	45.3563	0.921883	0.413126	2.23148	0.0256492	0.140912	ataxin 7-like 1 [Source:ZFIN;Acc:ZDB-GENE-131127-383]
ENSDARG00000031359	cmpk2	36.1123	1.25714	0.563535	2.23081	0.0256936	0.141079	cytidine monophosphate (UMP-CMP) kinase 2, mitochondrial [Source:ZFIN;Acc:ZDB-GENE-040724-24]
ENSDARG00000079884	trim107	136.383	1.15355	0.517321	2.22984	0.0257577	0.141343	tripartite motif containing 107 [Source:ZFIN;Acc:ZDB-GENE-110919-5]
ENSDARG00000020447	tmtc4	180.957	0.718627	0.322622	2.22746	0.0259165	0.141898	transmembrane O-mannosyltransferase targeting cadherins 4 [Source:ZFIN;Acc:ZDB-GENE-070912-148]
ENSDARG00000100590	BX649421.1	16.3737	2.32244	1.04279	2.22713	0.0259384	0.141965	0
ENSDARG00000091127	klf15	537.413	0.830738	0.373084	2.22668	0.0259687	0.142055	Kruppel-like factor 15 [Source:ZFIN;Acc:ZDB-GENE-030131-7844]
ENSDARG00000058372	mcph1	14.8613	3.66391	1.64554	2.22656	0.0259764	0.142059	microcephalin 1 [Source:ZFIN;Acc:ZDB-GENE-060421-6122]
ENSDARG00000076002	osbpl5	305.468	0.66137	0.29706	2.22639	0.0259882	0.142085	oxysterol binding protein-like 5 [Source:ZFIN;Acc:ZDB-GENE-030131-5872]
ENSDARG00000011863	ptk7a	210.626	0.607907	0.273224	2.22494	0.026085	0.142424	protein tyrosine kinase 7a [Source:ZFIN;Acc:ZDB-GENE-050522-216]
ENSDARG00000005327	ftr66	18.6466	3.25219	1.46215	2.22425	0.0261313	0.1426	finTRIM family, member 66 [Source:ZFIN;Acc:ZDB-GENE-070912-661]
ENSDARG00000068763	plcg2	620.666	0.711766	0.320094	2.22362	0.0261743	0.142796	phospholipase C, gamma 2 [Source:ZFIN;Acc:ZDB-GENE-030131-9532]
ENSDARG00000099106	afmid	109.84	0.664396	0.298848	2.22319	0.0262029	0.142914	arylformamidase [Source:NCBI gene;Acc:550372]
ENSDARG00000021595	lhfpl3	651.389	3.10371	1.39654	2.22243	0.0262545	0.143119	LHFPL tetraspan subfamily member 3 [Source:NCBI gene;Acc:445050]
ENSDARG00000100464	si:dkey-193i10.1	27.2192	1.60347	0.721672	2.22188	0.0262913	0.143206	si:dkey-193i10.1 [Source:ZFIN;Acc:ZDB-GENE-070705-341]
ENSDARG00000042551	mboat2b	208.479	0.934809	0.42076	2.22171	0.0263026	0.143206	membrane bound O-acyltransferase domain containing 2b [Source:ZFIN;Acc:ZDB-GENE-041001-185]
ENSDARG00000082753	NC_002333.17	12720.7	0.74887	0.337447	2.21922	0.0264716	0.143879	0
ENSDARG00000099656	CR381657.1	3.83849	3.77535	1.70339	2.21637	0.0266659	NA	0
ENSDARG00000059202	tspan2b	36.8237	2.15241	0.971567	2.2154	0.0267328	0.144682	tetraspanin 2b [Source:ZFIN;Acc:ZDB-GENE-100922-60]
ENSDARG00000062019	rufy2	836.686	0.607105	0.274153	2.21447	0.0267963	0.14494	RUN and FYVE domain containing 2 [Source:ZFIN;Acc:ZDB-GENE-070424-66]
ENSDARG00000056659	ttbk1b	208.788	3.23937	1.46363	2.21325	0.0268804	0.145172	tau tubulin kinase 1b [Source:ZFIN;Acc:ZDB-GENE-100609-5]
ENSDARG00000051962	mmp15a	94.6082	1.11259	0.502772	2.21292	0.0269033	0.145181	matrix metallopeptidase 15a [Source:ZFIN;Acc:ZDB-GENE-070817-4]
ENSDARG00000101423	cyp2y3	1509.85	0.915036	0.413551	2.21263	0.0269229	0.145242	cytochrome P450, family 2, subfamily Y, polypeptide 3 [Source:ZFIN;Acc:ZDB-GENE-050522-490]
ENSDARG00000090310	CABZ01065328.1	7.08292	4.44723	2.01237	2.20995	0.0271087	NA	CD48 antigen-like [Source:NCBI gene;Acc:100329398]
ENSDARG00000005915	tcf3a	105.103	0.668704	0.302715	2.20902	0.0271732	0.146188	transcription factor 3a [Source:ZFIN;Acc:ZDB-GENE-990415-51]
ENSDARG00000004189	cbx1a	493.547	0.911187	0.41286	2.20701	0.0273134	0.146734	chromobox homolog 1a (HP1 beta homolog Drosophila) [Source:ZFIN;Acc:ZDB-GENE-030131-4945]
ENSDARG00000092052	gstk4	401.874	2.59377	1.17584	2.20588	0.0273922	0.147041	glutathione S-transferase kappa 4 [Source:ZFIN;Acc:ZDB-GENE-060421-6530]
ENSDARG00000007421	ftcd	2847.37	1.39708	0.633472	2.20543	0.0274241	0.147135	formimidoyltransferase cyclodeaminase [Source:ZFIN;Acc:ZDB-GENE-030131-9643]
ENSDARG00000078829	ccdc149a	35.1931	1.0651	0.483044	2.20497	0.0274562	0.147248	coiled-coil domain containing 149a [Source:NCBI gene;Acc:449999]
ENSDARG00000102894	CABZ01057159.1	247.54	1.81348	0.822596	2.20459	0.0274831	0.147272	0
ENSDARG00000116119	CABZ01097761.1	292.942	0.721657	0.327387	2.20429	0.0275038	0.147291	dual specificity protein phosphatase 13-like [Source:NCBI gene;Acc:100537679]
ENSDARG00000076904	loxl5b	7.05859	3.59408	1.63057	2.20418	0.0275113	NA	lysyl oxidase-like 5b [Source:ZFIN;Acc:ZDB-GENE-070818-3]
ENSDARG00000078026	zcchc24	319.855	0.609285	0.276479	2.20373	0.0275431	0.147463	zinc finger, CCHC domain containing 24 [Source:ZFIN;Acc:ZDB-GENE-030131-3573]
ENSDARG00000043448	itm2ca	1257.58	2.2109	1.00338	2.20346	0.0275622	0.147488	integral membrane protein 2Ca [Source:ZFIN;Acc:ZDB-GENE-040718-284]
ENSDARG00000030723	cldn11b	44.5386	0.811455	0.368553	2.20173	0.0276843	0.147972	claudin 11b [Source:ZFIN;Acc:ZDB-GENE-010328-13]
ENSDARG00000095455	si:dkey-20i20.10	15.8426	1.50075	0.681645	2.20167	0.0276889	0.147972	si:dkey-20i20.10 [Source:ZFIN;Acc:ZDB-GENE-060503-905]
ENSDARG00000117241	CABZ01067657.1	9.70897	3.66019	1.66346	2.20035	0.0277823	NA	0
ENSDARG00000056062	adgre14	54.2659	0.949601	0.431688	2.19974	0.0278255	0.148585	adhesion G protein-coupled receptor E14 [Source:ZFIN;Acc:ZDB-GENE-131120-49]
ENSDARG00000022564	C18H11orf58	196.218	0.693421	0.315609	2.19709	0.0280138	0.149317	zgc:56106 [Source:NCBI gene;Acc:393163]
ENSDARG00000079010	si:dkey-7i4.5	13.6888	1.39962	0.637073	2.19695	0.0280237	0.14933	si:dkey-7i4.5 [Source:ZFIN;Acc:ZDB-GENE-131120-155]
ENSDARG00000025348	igfbp5b	1434.55	0.820405	0.373459	2.19678	0.0280365	0.14936	insulin-like growth factor binding protein 5b [Source:ZFIN;Acc:ZDB-GENE-040319-2]
ENSDARG00000094965	nfil3-5	1519.9	1.37233	0.624792	2.19646	0.0280592	0.149402	nuclear factor, interleukin 3 regulated, member 5 [Source:ZFIN;Acc:ZDB-GENE-030131-7677]
ENSDARG00000074721	rassf9	40.9524	1.61121	0.733961	2.19523	0.0281472	0.149754	Ras association domain family member 9 [Source:ZFIN;Acc:ZDB-GENE-091204-470]
ENSDARG00000091233	FP236356.1	165.716	1.1522	0.524993	2.19471	0.0281848	0.149797	0
ENSDARG00000027984	gstz1	1051.71	0.794609	0.362088	2.19452	0.0281981	0.149797	glutathione S-transferase zeta 1 [Source:ZFIN;Acc:ZDB-GENE-040718-184]
ENSDARG00000061946	commd4	164.234	0.647906	0.295254	2.1944	0.0282067	0.149797	COMM domain containing 4 [Source:ZFIN;Acc:ZDB-GENE-060929-600]
ENSDARG00000068759	si:ch211-244o22.2	86.0381	1.70946	0.77935	2.19344	0.0282758	0.150018	si:ch211-244o22.2 [Source:ZFIN;Acc:ZDB-GENE-030131-3271]
ENSDARG00000098904	pex1	221.136	0.628109	0.286408	2.19306	0.0283031	0.150077	peroxisomal biogenesis factor 1 [Source:ZFIN;Acc:ZDB-GENE-070530-1]
ENSDARG00000036670	aplnrb	102.692	0.737821	0.336571	2.19217	0.0283673	0.150219	apelin receptor b [Source:NCBI gene;Acc:565492]
ENSDARG00000071406	tepsin	153.691	0.586669	0.267682	2.19166	0.0284039	0.150328	TEPSIN adaptor related protein complex 4 accessory protein [Source:ZFIN;Acc:ZDB-GENE-100716-1]
ENSDARG00000074588	METTL18	51.0771	0.687245	0.313711	2.19069	0.0284742	0.150473	si:dkey-15f17.8 [Source:ZFIN;Acc:ZDB-GENE-090313-192]
ENSDARG00000055809	vtg2	63.589	3.82952	1.74888	2.18969	0.0285466	0.150699	vitellogenin 2 [Source:ZFIN;Acc:ZDB-GENE-001201-2]
ENSDARG00000077910	si:zfos-1897c11.1	13.8093	1.68499	0.770314	2.1874	0.028713	0.151342	si:zfos-1897c11.1 [Source:ZFIN;Acc:ZDB-GENE-160727-5]
ENSDARG00000099596	btd	196.789	0.602037	0.275362	2.18635	0.0287903	0.151601	biotinidase [Source:ZFIN;Acc:ZDB-GENE-060825-186]
ENSDARG00000023768	mfsd4aa	85.0467	1.26191	0.577737	2.18423	0.0289456	0.152038	major facilitator superfamily domain containing 4Aa [Source:NCBI gene;Acc:393503]
ENSDARG00000003974	spoplb	557.839	0.887562	0.406532	2.18325	0.0290174	0.152278	speckle type BTB/POZ protein like b [Source:NCBI gene;Acc:558170]
ENSDARG00000070132	aste1a	471.526	1.1518	0.527613	2.18303	0.0290336	0.152286	asteroid homolog 1a [Source:NCBI gene;Acc:100006826]
ENSDARG00000086374	isg15	336.381	1.06752	0.489334	2.18158	0.0291404	0.15266	ISG15 ubiquitin like modifier [Source:ZFIN;Acc:ZDB-GENE-021211-1]
ENSDARG00000096867	clmn	376.518	0.69122	0.316868	2.18141	0.0291529	0.152674	calmin [Source:ZFIN;Acc:ZDB-GENE-131127-546]
ENSDARG00000021702	pdcd4a	759.968	0.774389	0.35556	2.17794	0.0294103	0.153668	programmed cell death 4a [Source:ZFIN;Acc:ZDB-GENE-040426-1920]
ENSDARG00000001994	stxbp1a	3273.44	2.84057	1.30451	2.1775	0.0294433	0.153745	syntaxin binding protein 1a [Source:ZFIN;Acc:ZDB-GENE-050626-106]
ENSDARG00000023448	galnt14	320.961	0.754242	0.346534	2.17653	0.0295158	0.153982	UDP-N-acetyl-alpha-D-galactosamine:polypeptide N-acetylgalactosaminyltransferase 14 (GalNAc-T14) [Source:ZFIN;Acc:ZDB-GENE-041014-351]
ENSDARG00000074739	slitrk3b	113.458	1.75813	0.807847	2.17631	0.0295319	0.154027	SLIT and NTRK-like family, member 3b [Source:ZFIN;Acc:ZDB-GENE-070912-352]
ENSDARG00000061797	zgc:154006	151.39	0.962919	0.442701	2.1751	0.0296226	0.154318	zgc:154006 [Source:ZFIN;Acc:ZDB-GENE-061013-134]
ENSDARG00000016856	pon2	142.474	1.23557	0.568064	2.17506	0.0296257	0.154318	paraoxonase 2 [Source:ZFIN;Acc:ZDB-GENE-030131-7116]
ENSDARG00000033361	asl	139.777	0.832865	0.383042	2.17435	0.0296791	0.154478	argininosuccinate lyase [Source:ZFIN;Acc:ZDB-GENE-040426-1152]
ENSDARG00000079012	cbfa2t3	76.8756	1.42683	0.656562	2.17319	0.0297664	0.1548	CBFA2/RUNX1 partner transcriptional co-repressor 3 [Source:ZFIN;Acc:ZDB-GENE-070209-2]
ENSDARG00000110454	BX005380.2	6.14585	1.69356	0.779303	2.17318	0.0297671	NA	0
ENSDARG00000117405	BX571827.3	27.4856	1.74563	0.803269	2.17316	0.0297685	0.1548	0
ENSDARG00000078136	wdr47a	251.724	1.32984	0.612009	2.17292	0.0297867	0.1548	WD repeat domain 47a [Source:ZFIN;Acc:ZDB-GENE-070216-3]
ENSDARG00000057322	tmem47	437.725	0.61112	0.281327	2.17228	0.0298347	0.154823	transmembrane protein 47 [Source:NCBI gene;Acc:406640]
ENSDARG00000078647	samsn1b	54.051	1.14334	0.526714	2.1707	0.0299538	0.155156	SAM domain, SH3 domain and nuclear localisation signals 1b [Source:ZFIN;Acc:ZDB-GENE-041010-135]
ENSDARG00000111129	acy1	79.9252	0.930983	0.429144	2.1694	0.0300526	0.155549	aminoacylase 1 [Source:ZFIN;Acc:ZDB-GENE-040426-755]
ENSDARG00000103324	si:ch211-127b6.2	32.5438	1.34046	0.618133	2.16856	0.0301161	0.15564	si:ch211-127b6.2 [Source:ZFIN;Acc:ZDB-GENE-081103-37]
ENSDARG00000115962	LO017799.1	7.32281	3.0104	1.38853	2.16805	0.0301548	NA	transcription factor Adf-1-like [Source:NCBI gene;Acc:110439798]
ENSDARG00000010442	rnf11a	534.644	0.587542	0.271062	2.16755	0.0301926	0.155844	ring finger protein 11a [Source:ZFIN;Acc:ZDB-GENE-040426-1277]
ENSDARG00000045870	plekha5	636.696	0.619205	0.285701	2.16732	0.0302105	0.155844	pleckstrin homology domain containing, family A member 5 [Source:ZFIN;Acc:ZDB-GENE-041210-25]
ENSDARG00000045463	ralaa	245.477	0.716016	0.330382	2.16724	0.0302166	0.155844	v-ral simian leukemia viral oncogene homolog Aa (ras related) [Source:ZFIN;Acc:ZDB-GENE-040426-1344]
ENSDARG00000063580	ppp1r9ala	288.182	0.637792	0.294676	2.16438	0.030435	0.156653	protein phosphatase 1 regulatory subunit 9A-like A [Source:ZFIN;Acc:ZDB-GENE-091204-412]
ENSDARG00000093999	si:ch73-376l24.6	55.0787	0.954467	0.441042	2.16412	0.0304552	0.156691	si:ch73-376l24.6 [Source:ZFIN;Acc:ZDB-GENE-100921-87]
ENSDARG00000068849	fam83ha	328.962	0.591399	0.273299	2.16392	0.0304703	0.156691	family with sequence similarity 83 member Ha [Source:ZFIN;Acc:ZDB-GENE-090312-104]
ENSDARG00000024092	lmbr1	129.172	0.802397	0.370812	2.16389	0.030473	0.156691	limb development membrane protein 1 [Source:ZFIN;Acc:ZDB-GENE-090128-4]
ENSDARG00000041430	bmp2b	52.4524	1.51138	0.698511	2.16372	0.0304861	0.156719	bone morphogenetic protein 2b [Source:ZFIN;Acc:ZDB-GENE-980526-474]
ENSDARG00000087461	si:dkey-21c1.4	32.3725	0.972989	0.449744	2.16343	0.0305082	0.156769	si:dkey-21c1.4 [Source:ZFIN;Acc:ZDB-GENE-130603-44]
ENSDARG00000100719	uraha	176.432	1.2472	0.576689	2.1627	0.0305643	0.156963	urate (5-hydroxyiso-) hydrolase a [Source:NCBI gene;Acc:751742]
ENSDARG00000035127	rxrab	10.4132	2.66392	1.23215	2.162	0.030618	NA	retinoid x receptor, alpha b [Source:NCBI gene;Acc:793011]
ENSDARG00000097429	BX005461.3	2.58813	3.46842	1.60468	2.16144	0.0306614	NA	0
ENSDARG00000092123	si:dkey-20d21.12	46.8254	1.35619	0.627841	2.16009	0.0307657	0.157679	si:dkey-20d21.12 [Source:ZFIN;Acc:ZDB-GENE-081104-365]
ENSDARG00000103298	ephx5	607.203	1.4426	0.668497	2.15798	0.0309296	0.15832	epoxide hydrolase 5 [Source:ZFIN;Acc:ZDB-GENE-030131-1050]
ENSDARG00000045299	vmo1b	1483.45	1.28849	0.597698	2.15576	0.0311027	0.158955	vitelline membrane outer layer 1 homolog b [Source:ZFIN;Acc:ZDB-GENE-120215-131]
ENSDARG00000104453	flt4	122.866	0.59158	0.274853	2.15235	0.0313697	0.159708	fms-related tyrosine kinase 4 [Source:NCBI gene;Acc:30121]
ENSDARG00000022650	cyp2ad3	698.177	0.858936	0.399095	2.15221	0.0313809	0.159708	cytochrome P450, family 2, subfamily AD, polypeptide 3 [Source:ZFIN;Acc:ZDB-GENE-041001-156]
ENSDARG00000007601	zmynd8	279.119	0.665182	0.30917	2.15151	0.031436	0.159909	zinc finger, MYND-type containing 8 [Source:ZFIN;Acc:ZDB-GENE-041119-1]
ENSDARG00000079402	tapbp.1	296.415	0.869292	0.404151	2.15091	0.0314832	0.160095	TAP binding protein (tapasin), tandem duplicate 1 [Source:ZFIN;Acc:ZDB-GENE-010110-2]
ENSDARG00000097863	si:dkeyp-84f3.9	131.87	0.77718	0.361553	2.14956	0.0315899	0.160451	si:dkeyp-84f3.9 [Source:ZFIN;Acc:ZDB-GENE-131127-66]
ENSDARG00000100099	si:dkey-238o14.1	14.1791	1.90845	0.887955	2.14926	0.0316138	0.160469	si:dkey-238o14.1 [Source:ZFIN;Acc:ZDB-GENE-081103-10]
ENSDARG00000002411	pde4cb	209.828	1.14332	0.531972	2.14922	0.0316169	0.160469	phosphodiesterase 4C, cAMP-specific b [Source:ZFIN;Acc:ZDB-GENE-030131-4075]
ENSDARG00000099004	CABZ01102170.1	404.113	0.901314	0.419368	2.14922	0.0316169	0.160469	0
ENSDARG00000104868	KCNT1	383.375	1.63462	0.760871	2.14835	0.0316857	0.160778	si:dkey-21e5.1 [Source:ZFIN;Acc:ZDB-GENE-141210-6]
ENSDARG00000091726	aebp1	294.493	0.705289	0.328359	2.14792	0.0317202	0.160868	AE binding protein 1 [Source:ZFIN;Acc:ZDB-GENE-030131-2390]
ENSDARG00000101885	si:dkey-20i20.11	9.4235	2.61297	1.21652	2.14791	0.031721	NA	si:dkey-20i20.11 [Source:ZFIN;Acc:ZDB-GENE-060503-58]
ENSDARG00000016350	cap1	187.162	0.63882	0.297547	2.14695	0.0317969	0.161062	CAP, adenylate cyclase-associated protein 1 (yeast) [Source:ZFIN;Acc:ZDB-GENE-030131-6459]
ENSDARG00000005834	gatad2b	233.215	0.606521	0.282539	2.14668	0.031819	0.161099	GATA zinc finger domain containing 2B [Source:ZFIN;Acc:ZDB-GENE-060503-655]
ENSDARG00000021184	rbfox1l	166.323	1.08994	0.507813	2.14635	0.0318453	0.161147	RNA binding fox-1 homolog 1, like [Source:NCBI gene;Acc:407613]
ENSDARG00000092810	stap2a	73.3969	1.86728	0.870056	2.14616	0.0318602	0.161182	signal transducing adaptor family member 2a [Source:ZFIN;Acc:ZDB-GENE-030131-5383]
ENSDARG00000093054	BX548073.3	80.1192	0.898054	0.418501	2.14588	0.0318824	0.161191	0
ENSDARG00000063411	lrrc73	108.812	3.00476	1.40033	2.14575	0.0318929	0.161191	leucine rich repeat containing 73 [Source:ZFIN;Acc:ZDB-GENE-111118-2]
ENSDARG00000003144	pxmp2	530.138	0.81585	0.380301	2.14527	0.0319309	0.16134	peroxisomal membrane protein 2 [Source:ZFIN;Acc:ZDB-GENE-040912-184]
ENSDARG00000079979	fam89a	54.6166	0.888166	0.414144	2.14459	0.031986	0.161578	family with sequence similarity 89 member A [Source:ZFIN;Acc:ZDB-GENE-111019-1]
ENSDARG00000104846	atg10	63.4597	0.753485	0.351376	2.14438	0.0320023	0.16162	ATG10 autophagy related 10 homolog (S. cerevisiae) [Source:ZFIN;Acc:ZDB-GENE-051030-72]
ENSDARG00000078130	CR391986.1	32.2981	0.957649	0.446704	2.14381	0.032048	0.161771	glutamate rich 1 [Source:NCBI gene;Acc:100002532]
ENSDARG00000007467	ifit10	17.5152	2.67789	1.25003	2.14225	0.032173	0.162121	interferon-induced protein with tetratricopeptide repeats 10 [Source:ZFIN;Acc:ZDB-GENE-121214-248]
ENSDARG00000078504	si:ch73-60h1.1	72.3132	3.00427	1.40269	2.14179	0.0322103	0.162181	si:ch73-60h1.1 [Source:ZFIN;Acc:ZDB-GENE-140106-152]
ENSDARG00000014259	eya1	79.7746	2.04572	0.955212	2.14164	0.0322224	0.162181	EYA transcriptional coactivator and phosphatase 1 [Source:ZFIN;Acc:ZDB-GENE-990712-18]
ENSDARG00000117236	CU062632.1	27.4162	2.86479	1.33766	2.14164	0.0322228	0.162181	ubiquitin-conjugating enzyme E2O [Source:NCBI gene;Acc:101883975]
ENSDARG00000017036	svilc	229.605	2.8674	1.33963	2.14043	0.0323196	0.162499	supervillin c [Source:ZFIN;Acc:ZDB-GENE-041008-237]
ENSDARG00000102846	trmt13	72.5355	0.655104	0.306087	2.14025	0.0323344	0.162533	tRNA methyltransferase 13 homolog [Source:ZFIN;Acc:ZDB-GENE-050327-19]
ENSDARG00000107576	INSYN2A	23.7124	3.01238	1.40766	2.13999	0.0323557	0.1626	inhibitory synaptic factor 2Ab [Source:NCBI gene;Acc:100002268]
ENSDARG00000079327	hmcn2	33.4837	1.65841	0.775158	2.13944	0.0323998	0.162696	hemicentin 2 [Source:ZFIN;Acc:ZDB-GENE-030131-9765]
ENSDARG00000103315	CU464124.1	79.6758	0.667501	0.31201	2.13936	0.0324068	0.162696	uncharacterized LOC103911399 [Source:NCBI gene;Acc:103911399]
ENSDARG00000114142	si:dkeyp-4f2.1	18.9707	1.60168	0.748896	2.13872	0.0324583	0.162834	si:dkeyp-4f2.1 [Source:ZFIN;Acc:ZDB-GENE-081103-33]
ENSDARG00000017466	ncam2	274.292	3.00472	1.40516	2.13836	0.0324877	0.162942	neural cell adhesion molecule 2 [Source:ZFIN;Acc:ZDB-GENE-010822-1]
ENSDARG00000091841	si:cabz01071909.2	23.0171	1.05334	0.492672	2.13802	0.0325149	0.162961	si:cabz01071909.2 [Source:ZFIN;Acc:ZDB-GENE-161017-114]
ENSDARG00000096030	si:dkey-262g12.7	19.8566	1.1305	0.528785	2.13792	0.0325234	0.162961	si:dkey-262g12.7 [Source:ZFIN;Acc:ZDB-GENE-110914-181]
ENSDARG00000059781	atcayb	174.725	2.99336	1.40052	2.13732	0.0325721	0.16311	ATCAY kinesin light chain interacting caytaxin b [Source:ZFIN;Acc:ZDB-GENE-070912-220]
ENSDARG00000105055	CABZ01000633.3	3.0442	3.33568	1.56275	2.13448	0.0328031	NA	0
ENSDARG00000017537	prkag3a	79.9006	1.97929	0.927407	2.13421	0.0328252	0.16415	protein kinase, AMP-activated, gamma 3a non-catalytic subunit [Source:ZFIN;Acc:ZDB-GENE-091204-419]
ENSDARG00000088342	tmem145	176.996	2.98789	1.40114	2.13247	0.0329686	0.164625	transmembrane protein 145 [Source:ZFIN;Acc:ZDB-GENE-110411-84]
ENSDARG00000073713	vav3b	71.2448	2.98718	1.40236	2.13011	0.0331629	0.165271	vav 3 guanine nucleotide exchange factor b [Source:ZFIN;Acc:ZDB-GENE-070912-251]
ENSDARG00000021351	nefma	1952.89	2.82492	1.32703	2.12875	0.0332746	0.165615	neurofilament, medium polypeptide a [Source:ZFIN;Acc:ZDB-GENE-050522-205]
ENSDARG00000040290	pon3.2	435.632	0.893764	0.420177	2.12711	0.0334107	0.16606	paraoxonase 3, tandem duplicate 2 [Source:ZFIN;Acc:ZDB-GENE-071004-70]
ENSDARG00000086169	rskrb	21.062	1.68597	0.792776	2.12666	0.0334482	0.166165	ribosomal protein S6 kinase related b [Source:ZFIN;Acc:ZDB-GENE-120215-252]
ENSDARG00000103919	si:ch73-1a9.3	1956.8	0.784979	0.369223	2.12603	0.0335006	0.166345	si:ch73-1a9.3 [Source:ZFIN;Acc:ZDB-GENE-141216-84]
ENSDARG00000019856	atp1a1b	4666.12	1.51315	0.711889	2.12554	0.0335416	0.166467	ATPase Na+/K+ transporting subunit alpha 1b [Source:ZFIN;Acc:ZDB-GENE-001212-5]
ENSDARG00000089790	efna5a	169.703	1.3855	0.651893	2.12535	0.0335572	0.166504	ephrin-A5a [Source:ZFIN;Acc:ZDB-GENE-001128-1]
ENSDARG00000097179	CR538726.1	2.79545	3.34661	1.57478	2.12513	0.0335756	NA	0
ENSDARG00000029476	ldlra	3073.59	1.23729	0.58289	2.12268	0.0337811	0.167127	low density lipoprotein receptor a [Source:ZFIN;Acc:ZDB-GENE-031217-1]
ENSDARG00000100594	sez6l	410.904	3.19214	1.5043	2.12201	0.0338372	0.167315	seizure related 6 homolog (mouse)-like [Source:ZFIN;Acc:ZDB-GENE-091204-162]
ENSDARG00000035324	hnrnpl	1253.86	0.591023	0.278654	2.121	0.0339222	0.167622	heterogeneous nuclear ribonucleoprotein L [Source:ZFIN;Acc:ZDB-GENE-040426-710]
ENSDARG00000060927	si:ch211-136a13.1	101.965	1.02615	0.484219	2.11919	0.0340746	0.168207	si:ch211-136a13.1 [Source:ZFIN;Acc:ZDB-GENE-050419-214]
ENSDARG00000062231	znf362b	58.7699	0.878849	0.414814	2.11866	0.0341193	0.168351	zinc finger protein 362b [Source:ZFIN;Acc:ZDB-GENE-070424-35]
ENSDARG00000037773	rybpa	180.647	0.649933	0.307019	2.11692	0.034267	0.168876	RING1 and YY1 binding protein a [Source:NCBI gene;Acc:368248]
ENSDARG00000095789	ccr8.1	15.1172	1.26063	0.59626	2.11423	0.0344956	0.169879	chemokine (C-C motif) receptor 8.1 [Source:ZFIN;Acc:ZDB-GENE-070302-1]
ENSDARG00000076552	zgc:193801	58.0684	0.735729	0.34803	2.11398	0.0345169	0.169907	zgc:193801 [Source:ZFIN;Acc:ZDB-GENE-081022-40]
ENSDARG00000042214	tmem243a	10.5685	1.54746	0.73278	2.11177	0.0347065	NA	transmembrane protein 243, mitochondrial a [Source:ZFIN;Acc:ZDB-GENE-050417-264]
ENSDARG00000073665	rasa1b	165.369	0.658567	0.311864	2.11171	0.034711	0.170692	RAS p21 protein activator (GTPase activating protein) 1b [Source:ZFIN;Acc:ZDB-GENE-090311-50]
ENSDARG00000035823	zmym4	238.503	0.65851	0.311907	2.11124	0.034752	0.170812	zinc finger, MYM-type 4 [Source:ZFIN;Acc:ZDB-GENE-030131-5459]
ENSDARG00000098279	si:zfos-451d2.2	19.4288	2.88488	1.36717	2.11012	0.0348484	0.171119	si:zfos-451d2.2 [Source:ZFIN;Acc:ZDB-GENE-141212-290]
ENSDARG00000090170	rab11fip4a	573.262	1.91881	0.910283	2.10792	0.0350375	0.171823	RAB11 family interacting protein 4 (class II) a [Source:NCBI gene;Acc:436806]
ENSDARG00000093619	sult3st2	833.372	0.676946	0.321146	2.10791	0.0350391	0.171823	sulfotransferase family 3, cytosolic sulfotransferase 2 [Source:ZFIN;Acc:ZDB-GENE-030131-1135]
ENSDARG00000059689	mblac2	19.3804	1.3922	0.660583	2.10754	0.0350712	0.171905	metallo-beta-lactamase domain containing 2 [Source:ZFIN;Acc:ZDB-GENE-081104-313]
ENSDARG00000076483	dhrs13b.2	39.8965	0.665063	0.315572	2.10749	0.0350755	0.171905	dehydrogenase/reductase (SDR family) member 13b.2 [Source:ZFIN;Acc:ZDB-GENE-080303-14]
ENSDARG00000061311	znf438	104.689	0.744478	0.353384	2.10671	0.0351427	0.171944	zinc finger protein 438 [Source:ZFIN;Acc:ZDB-GENE-060929-868]
ENSDARG00000058047	pafah1b3	265.363	0.736433	0.349603	2.10649	0.0351622	0.171999	platelet-activating factor acetylhydrolase, isoform Ib, gamma subunit [Source:ZFIN;Acc:ZDB-GENE-040426-1026]
ENSDARG00000098158	cpxm1b	67.4767	1.30913	0.62156	2.10621	0.0351862	0.172075	carboxypeptidase X (M14 family), member 1b [Source:ZFIN;Acc:ZDB-GENE-141212-305]
ENSDARG00000105218	ompa	5.35333	3.4819	1.65424	2.10484	0.0353055	NA	olfactory marker protein a [Source:ZFIN;Acc:ZDB-GENE-050626-118]
ENSDARG00000117133	cst14b.1	279.149	0.778683	0.370111	2.10392	0.0353856	0.172677	cystatin 14b, tandem duplicate 1 [Source:NCBI gene;Acc:768128]
ENSDARG00000100127	znf1178	20.5076	1.05697	0.502784	2.10224	0.035532	0.173184	zinc finger protein 1178 [Source:ZFIN;Acc:ZDB-GENE-050208-466]
ENSDARG00000053487	osbp2	267.441	3.00455	1.42927	2.10216	0.0355394	0.173184	oxysterol binding protein 2 [Source:ZFIN;Acc:ZDB-GENE-091113-18]
ENSDARG00000054050	vsig8a	19.816	2.0414	0.971104	2.10215	0.0355404	0.173184	V-set and immunoglobulin domain containing 8a [Source:ZFIN;Acc:ZDB-GENE-050417-338]
ENSDARG00000094328	si:dkey-93n13.1	33.9124	1.44438	0.687227	2.10175	0.0355756	0.173273	si:dkey-93n13.1 [Source:ZFIN;Acc:ZDB-GENE-091204-23]
ENSDARG00000078902	rims1b	348.537	1.65535	0.787944	2.10084	0.0356549	0.173617	regulating synaptic membrane exocytosis 1b [Source:ZFIN;Acc:ZDB-GENE-101223-4]
ENSDARG00000076330	dusp12	56.3325	0.709936	0.337996	2.10043	0.0356914	0.173676	dual specificity phosphatase 12 [Source:ZFIN;Acc:ZDB-GENE-050626-91]
ENSDARG00000076919	igdcc4	182.91	0.91694	0.437213	2.09724	0.0359722	0.174455	immunoglobulin superfamily, DCC subclass, member 4 [Source:ZFIN;Acc:ZDB-GENE-080327-32]
ENSDARG00000074466	gdpd3a	255.504	0.82496	0.393458	2.09669	0.0360208	0.174607	glycerophosphodiester phosphodiesterase domain containing 3a [Source:ZFIN;Acc:ZDB-GENE-040426-2279]
ENSDARG00000077078	zgc:173726	25.3407	0.956716	0.457047	2.09325	0.0363265	0.175678	zgc:173726 [Source:ZFIN;Acc:ZDB-GENE-071004-108]
ENSDARG00000097653	si:dkey-23k10.3	90.6106	1.03203	0.493035	2.09322	0.0363292	0.175678	si:dkey-23k10.3 [Source:ZFIN;Acc:ZDB-GENE-131126-11]
ENSDARG00000077710	nlgn1	57.6406	3.55517	1.69848	2.09314	0.0363365	0.175678	neuroligin 1 [Source:ZFIN;Acc:ZDB-GENE-090918-1]
ENSDARG00000097193	si:dkey-28n18.9	299.453	1.57722	0.754332	2.09088	0.0365391	0.176365	si:dkey-28n18.9 [Source:ZFIN;Acc:ZDB-GENE-131127-205]
ENSDARG00000103261	CABZ01038699.1	21.645	0.94508	0.452117	2.09034	0.0365869	0.176408	0
ENSDARG00000075143	nanp	118.898	0.709513	0.339453	2.09017	0.0366027	0.176408	N-acetylneuraminic acid phosphatase [Source:ZFIN;Acc:ZDB-GENE-050522-94]
ENSDARG00000096876	CR847984.1	7.64441	4.26073	2.04054	2.08804	0.0367942	NA	0
ENSDARG00000104085	abcd3a	3110.23	0.635498	0.304933	2.08406	0.0371548	0.17803	ATP-binding cassette, sub-family D (ALD), member 3a [Source:ZFIN;Acc:ZDB-GENE-040426-2868]
ENSDARG00000104351	CR318589.1	4.12145	3.32645	1.59642	2.0837	0.0371878	NA	0
ENSDARG00000100774	cmc4	11.8023	1.20817	0.579855	2.08357	0.0371989	NA	C-x(9)-C motif containing 4 homolog (S. cerevisiae) [Source:ZFIN;Acc:ZDB-GENE-120216-1]
ENSDARG00000020744	bdkrb1	8.1739	2.84559	1.36656	2.0823	0.0373148	NA	bradykinin receptor B1 [Source:ZFIN;Acc:ZDB-GENE-030814-1]
ENSDARG00000007366	AMDHD1	355.243	1.13587	0.545588	2.08192	0.0373495	0.178753	si:ch73-71d17.1 [Source:NCBI gene;Acc:402826]
ENSDARG00000117762	BX537277.3	14.8303	2.69079	1.29284	2.08129	0.0374071	0.178903	0
ENSDARG00000109604	znf1026	4.27394	3.24714	1.56048	2.08085	0.0374474	NA	zinc finger protein 1026 [Source:ZFIN;Acc:ZDB-GENE-110913-157]
ENSDARG00000020771	tnr	152.383	1.36533	0.6564	2.08002	0.0375235	0.17925	tenascin R (restrictin, janusin) [Source:ZFIN;Acc:ZDB-GENE-030804-1]
ENSDARG00000016763	znf292a	338.793	0.600378	0.288835	2.07862	0.0376524	0.179655	zinc finger protein 292a [Source:ZFIN;Acc:ZDB-GENE-071004-18]
ENSDARG00000027497	mast1a	96.6511	2.99186	1.43965	2.07818	0.0376926	0.179765	microtubule associated serine/threonine kinase 1a [Source:ZFIN;Acc:ZDB-GENE-121214-221]
ENSDARG00000079613	sall3a	56.0407	3.0244	1.45663	2.0763	0.0378664	0.180338	spalt-like transcription factor 3a [Source:ZFIN;Acc:ZDB-GENE-020228-4]
ENSDARG00000020890	tmod4	490.927	0.934031	0.450049	2.0754	0.0379495	0.180524	tropomodulin 4 (muscle) [Source:ZFIN;Acc:ZDB-GENE-991019-9]
ENSDARG00000090947	si:dkey-29j8.1	26.691	2.84291	1.37062	2.07417	0.0380635	0.180976	si:dkey-29j8.1 [Source:ZFIN;Acc:ZDB-GENE-110913-11]
ENSDARG00000034871	mid2	161.65	0.736525	0.355108	2.07409	0.0380713	0.180976	midline 2 [Source:ZFIN;Acc:ZDB-GENE-090220-1]
ENSDARG00000014015	pdia7	397.087	0.705106	0.340055	2.0735	0.0381255	0.181118	protein disulfide isomerase family A, member 7 [Source:ZFIN;Acc:ZDB-GENE-040426-2238]
ENSDARG00000013110	dmtn	194.954	0.948093	0.457248	2.07348	0.0381277	0.181118	dematin actin binding protein [Source:ZFIN;Acc:ZDB-GENE-030131-9438]
ENSDARG00000079271	dcxr	302.595	0.811549	0.391608	2.07235	0.0382327	0.181547	dicarbonyl/L-xylulose reductase [Source:ZFIN;Acc:ZDB-GENE-030131-7002]
ENSDARG00000053232	itgb1b.1	466.988	0.829863	0.400495	2.07209	0.0382568	0.181562	integrin, beta 1b.1 [Source:ZFIN;Acc:ZDB-GENE-060803-3]
ENSDARG00000089844	scarb2c	454.036	0.650141	0.314152	2.06952	0.0384978	0.182451	scavenger receptor class B, member 2c [Source:ZFIN;Acc:ZDB-GENE-030131-5789]
ENSDARG00000030778	BX323854.1	17.8181	3.32658	1.60762	2.06926	0.0385219	0.18248	0
ENSDARG00000101716	bace1	203.807	0.930497	0.449903	2.06822	0.0386196	0.18282	beta-secretase 1 [Source:ZFIN;Acc:ZDB-GENE-040426-1835]
ENSDARG00000105265	zgc:171534	327.878	2.17272	1.05053	2.06821	0.0386206	0.18282	zgc:171534 [Source:ZFIN;Acc:ZDB-GENE-080218-6]
ENSDARG00000040295	apoeb	15941.5	0.754654	0.365037	2.06733	0.0387027	0.182911	apolipoprotein Eb [Source:NCBI gene;Acc:30314]
ENSDARG00000062711	gal3st1a	67.6361	1.07484	0.519916	2.06733	0.0387035	0.182911	galactose-3-O-sulfotransferase 1a [Source:ZFIN;Acc:ZDB-GENE-060526-375]
ENSDARG00000070960	si:ch211-288g17.4	5880.74	1.08853	0.526762	2.06646	0.0387852	0.183174	si:ch211-288g17.4 [Source:ZFIN;Acc:ZDB-GENE-060531-62]
ENSDARG00000017665	snrkb	600.012	1.19712	0.579788	2.06476	0.038946	0.183643	SNF related kinase b [Source:ZFIN;Acc:ZDB-GENE-040426-1724]
ENSDARG00000020493	lgi1a	333.396	2.85511	1.38279	2.06474	0.0389476	0.183643	leucine-rich, glioma inactivated 1a [Source:ZFIN;Acc:ZDB-GENE-030131-1731]
ENSDARG00000073850	hdac7b	100.222	0.590246	0.285999	2.06381	0.0390362	0.183915	histone deacetylase 7b [Source:ZFIN;Acc:ZDB-GENE-131127-113]
ENSDARG00000035601	dao.3	241.293	1.63636	0.792998	2.06351	0.0390644	0.183924	D-amino-acid oxidase, tandem duplicate 3 [Source:ZFIN;Acc:ZDB-GENE-040426-1894]
ENSDARG00000103205	si:ch211-161f7.2	2.9639	4.52575	2.19386	2.06291	0.0391209	NA	si:ch211-161f7.2 [Source:ZFIN;Acc:ZDB-GENE-141212-384]
ENSDARG00000045011	tapbp.2	237.873	0.844258	0.40944	2.06198	0.0392092	0.184536	TAP binding protein (tapasin), tandem duplicate 2 [Source:ZFIN;Acc:ZDB-GENE-060503-136]
ENSDARG00000074451	mnd1	58.1658	1.98214	0.961633	2.06122	0.039282	0.184739	meiotic nuclear divisions 1 homolog (S. cerevisiae) [Source:NCBI gene;Acc:445203]
ENSDARG00000086691	dnajc12	84.1351	1.09934	0.533655	2.06001	0.0393976	0.185209	DnaJ (Hsp40) homolog, subfamily C, member 12 [Source:ZFIN;Acc:ZDB-GENE-070801-3]
ENSDARG00000010085	p4ha2	225.852	0.674154	0.327321	2.05961	0.0394357	0.185302	procollagen-proline, 2-oxoglutarate 4-dioxygenase (proline 4-hydroxylase), alpha polypeptide 2 [Source:ZFIN;Acc:ZDB-GENE-030827-1]
ENSDARG00000102982	CABZ01113981.1	33.9762	2.86245	1.3911	2.05769	0.0396195	0.185995	0
ENSDARG00000086052	si:ch211-106k21.5	22.5978	1.44163	0.701369	2.05545	0.0398351	0.186749	si:ch211-106k21.5 [Source:ZFIN;Acc:ZDB-GENE-070912-7]
ENSDARG00000051824	tmeff2a	235.318	3.03871	1.47893	2.05467	0.0399107	0.186974	transmembrane protein with EGF-like and two follistatin-like domains 2a [Source:ZFIN;Acc:ZDB-GENE-070912-622]
ENSDARG00000030872	cetp	452.943	1.07221	0.522007	2.05402	0.0399735	0.187225	cholesteryl ester transfer protein, plasma [Source:ZFIN;Acc:ZDB-GENE-041114-54]
ENSDARG00000036155	gla	161.482	1.04152	0.507268	2.0532	0.0400532	0.187436	galactosidase, alpha [Source:ZFIN;Acc:ZDB-GENE-041010-207]
ENSDARG00000086114	CR792417.1	2.69268	3.74046	1.82233	2.05257	0.0401141	NA	androgen-dependent TFPI-regulating protein-like [Source:NCBI gene;Acc:100537455]
ENSDARG00000097072	AL954322.2	63.7008	0.657269	0.320275	2.0522	0.0401504	0.187666	si:ch211-229g11.6 [Source:NCBI gene;Acc:101882098]
ENSDARG00000061478	igf2bp1	13.6519	1.48146	0.722226	2.05124	0.0402435	0.187797	insulin-like growth factor 2 mRNA binding protein 1 [Source:NCBI gene;Acc:558182]
ENSDARG00000103833	spink2.2	299.952	1.20499	0.587464	2.05118	0.0402495	0.187797	serine peptidase inhibitor, Kazal type 2, tandem duplicate 2 [Source:ZFIN;Acc:ZDB-GENE-141216-292]
ENSDARG00000102082	nr3c2	264.541	0.848702	0.414103	2.0495	0.0404134	0.188223	nuclear receptor subfamily 3, group C, member 2 [Source:ZFIN;Acc:ZDB-GENE-060531-23]
ENSDARG00000040452	fam214a	681.984	0.741059	0.36171	2.04876	0.0404851	0.188367	family with sequence similarity 214 member A [Source:NCBI gene;Acc:555595]
ENSDARG00000045888	acat1	2371.74	0.840926	0.410495	2.04857	0.0405045	0.188414	acetyl-CoA acetyltransferase 1 [Source:NCBI gene;Acc:445290]
ENSDARG00000101866	asic1b	108.924	0.769617	0.375748	2.04823	0.0405378	0.188466	acid-sensing (proton-gated) ion channel 1b [Source:NCBI gene;Acc:407672]
ENSDARG00000109726	PLCB1	100.942	2.97754	1.45396	2.04789	0.040571	0.188466	si:ch1073-140o9.2 [Source:ZFIN;Acc:ZDB-GENE-120709-104]
ENSDARG00000069339	tbc1d24	408.177	1.25288	0.611977	2.04726	0.0406327	0.188666	TBC1 domain family, member 24 [Source:ZFIN;Acc:ZDB-GENE-050809-65]
ENSDARG00000092476	si:rp71-1f1.4	10.4333	1.84131	0.899647	2.04671	0.0406867	NA	si:rp71-1f1.4 [Source:ZFIN;Acc:ZDB-GENE-040724-93]
ENSDARG00000059636	C5H2orf42	33.2098	1.56631	0.765602	2.04585	0.0407711	0.189051	si:ch211-127d4.3 [Source:ZFIN;Acc:ZDB-GENE-060526-22]
ENSDARG00000056961	ccdc30	163.886	0.793974	0.388264	2.04493	0.0408617	0.189342	coiled-coil domain containing 30 [Source:ZFIN;Acc:ZDB-GENE-130530-667]
ENSDARG00000042780	apoba	10336.3	1.35355	0.662292	2.04374	0.0409796	0.189802	apolipoprotein Ba [Source:ZFIN;Acc:ZDB-GENE-070702-4]
ENSDARG00000088967	wnk4b	234.261	0.656881	0.321511	2.04311	0.0410419	0.189961	WNK lysine deficient protein kinase 4b [Source:ZFIN;Acc:ZDB-GENE-131120-119]
ENSDARG00000092842	si:ch211-93g21.2	9.32161	2.82427	1.38323	2.04179	0.041172	NA	si:ch211-93g21.2 [Source:ZFIN;Acc:ZDB-GENE-060503-799]
ENSDARG00000079843	igl4v8	25.0357	2.18448	1.07028	2.04104	0.0412473	0.190456	immunoglobulin light 4 variable 8 [Source:ZFIN;Acc:ZDB-GENE-051013-6]
ENSDARG00000105127	si:ch211-155e24.3	150.444	0.672826	0.329654	2.04101	0.04125	0.190456	si:ch211-155e24.3 [Source:ZFIN;Acc:ZDB-GENE-070912-116]
ENSDARG00000100139	si:ch211-113d22.2	17.7449	3.44067	1.68579	2.04099	0.0412518	0.190456	si:ch211-113d22.2 [Source:ZFIN;Acc:ZDB-GENE-141222-39]
ENSDARG00000115220	BX005085.6	28.1476	0.965637	0.473517	2.03929	0.0414212	0.190865	0
ENSDARG00000045675	mdm1	114.04	1.43142	0.702065	2.03887	0.0414632	0.190942	Mdm1 nuclear protein [Source:NCBI gene;Acc:557148]
ENSDARG00000039832	gsta.2	668.127	1.05917	0.5196	2.03843	0.0415068	0.191033	glutathione S-transferase, alpha tandem duplicate 2 [Source:ZFIN;Acc:ZDB-GENE-070822-30]
ENSDARG00000070964	si:rp71-15k1.1	1775.28	1.44651	0.709622	2.03842	0.0415078	0.191033	si:rp71-15k1.1 [Source:ZFIN;Acc:ZDB-GENE-030131-1113]
ENSDARG00000033355	zgc:101699	384.8	1.40252	0.688233	2.03786	0.0415644	0.191164	zgc:101699 [Source:NCBI gene;Acc:492789]
ENSDARG00000026882	palm1a	128.767	0.752949	0.369519	2.03764	0.0415855	0.191218	paralemmin 1a [Source:ZFIN;Acc:ZDB-GENE-050417-409]
ENSDARG00000038669	gbp2	312.211	0.83314	0.408962	2.03721	0.0416295	0.191322	guanylate binding protein 2 [Source:ZFIN;Acc:ZDB-GENE-070912-618]
ENSDARG00000100478	TULP1	3.21518	3.45356	1.69537	2.03706	0.0416443	NA	tubby-related protein 1-like [Source:NCBI gene;Acc:103908677]
ENSDARG00000114646	znf1021	10.1917	1.20918	0.593702	2.03669	0.0416816	NA	zinc finger protein 1021 [Source:ZFIN;Acc:ZDB-GENE-110913-143]
ENSDARG00000104126	ccpg1	62.3402	1.16449	0.57207	2.03557	0.0417935	0.191828	cell cycle progression 1 [Source:ZFIN;Acc:ZDB-GENE-041114-136]
ENSDARG00000058815	ihhb	2.35886	3.31038	1.62875	2.03247	0.0421062	NA	Indian hedgehog signaling molecule b [Source:NCBI gene;Acc:30299]
ENSDARG00000101989	thrap3a	226.051	1.14806	0.565044	2.03181	0.0421728	0.193091	thyroid hormone receptor associated protein 3a [Source:ZFIN;Acc:ZDB-GENE-030219-79]
ENSDARG00000097879	BX323824.1	6.5296	2.35114	1.15759	2.03107	0.0422484	NA	0
ENSDARG00000059411	impa2	92.1159	1.46175	0.720002	2.03021	0.0423355	0.193619	inositol(myo)-1(or 4)-monophosphatase 2 [Source:ZFIN;Acc:ZDB-GENE-050522-349]
ENSDARG00000042658	acad8	431.542	0.795169	0.391911	2.02895	0.042463	0.194028	acyl-CoA dehydrogenase family, member 8 [Source:ZFIN;Acc:ZDB-GENE-040426-828]
ENSDARG00000103391	rab9b	79.6294	0.633457	0.312295	2.02839	0.0425202	0.194202	RAB9B, member RAS oncogene family [Source:ZFIN;Acc:ZDB-GENE-091118-112]
ENSDARG00000019420	etnk1	1802.12	0.657358	0.324139	2.02802	0.0425586	0.194335	ethanolamine kinase 1 [Source:ZFIN;Acc:ZDB-GENE-030328-21]
ENSDARG00000037960	lrrc17	583.53	1.21514	0.599342	2.02745	0.0426161	0.194354	leucine rich repeat containing 17 [Source:ZFIN;Acc:ZDB-GENE-030131-9774]
ENSDARG00000063253	hecw2b	69.312	0.768199	0.379178	2.02596	0.0427688	0.194728	HECT, C2 and WW domain containing E3 ubiquitin protein ligase 2b [Source:ZFIN;Acc:ZDB-GENE-101001-3]
ENSDARG00000093875	zgc:174224	15.6187	1.22474	0.605125	2.02395	0.0429758	0.195321	zgc:174224 [Source:ZFIN;Acc:ZDB-GENE-071004-118]
ENSDARG00000091304	card19	168.647	0.890489	0.440946	2.0195	0.0434358	0.196929	caspase recruitment domain family, member 19 [Source:ZFIN;Acc:ZDB-GENE-041008-5]
ENSDARG00000102138	foxa1	210.353	0.701483	0.347472	2.01882	0.0435059	0.197115	forkhead box A1 [Source:ZFIN;Acc:ZDB-GENE-990415-78]
ENSDARG00000112651	CU182823.2	6.37761	2.86601	1.42116	2.01667	0.0437295	NA	0
ENSDARG00000053364	pax10	6.5928	2.8794	1.42819	2.01611	0.0437885	NA	paired box 10 [Source:ZFIN;Acc:ZDB-GENE-081022-10]
ENSDARG00000077698	rsad1	19.4276	1.19985	0.59515	2.01605	0.0437949	0.198116	radical S-adenosyl methionine domain containing 1 [Source:NCBI gene;Acc:565897]
ENSDARG00000015866	apoa2	181298	1.364	0.676768	2.01547	0.0438557	0.19826	apolipoprotein A-II [Source:ZFIN;Acc:ZDB-GENE-030131-1046]
ENSDARG00000031299	dhrs11b	1061.18	0.939961	0.466728	2.01394	0.044016	0.198808	dehydrogenase/reductase (SDR family) member 11b [Source:ZFIN;Acc:ZDB-GENE-040625-155]
ENSDARG00000004502	rcor3	68.3976	0.680227	0.337888	2.01317	0.0440963	0.199083	REST corepressor 3 [Source:ZFIN;Acc:ZDB-GENE-050208-371]
ENSDARG00000075147	lrrc38a	15.4191	2.9867	1.48484	2.01146	0.044277	0.199721	leucine rich repeat containing 38a [Source:ZFIN;Acc:ZDB-GENE-080327-12]
ENSDARG00000011170	ndrg2	3285.53	0.921039	0.45798	2.01109	0.0443158	0.199808	NDRG family member 2 [Source:NCBI gene;Acc:494050]
ENSDARG00000105809	CR376774.1	15.0475	2.97139	1.47837	2.00991	0.0444405	0.200237	0
ENSDARG00000093780	BX548078.1	1408.97	1.05923	0.527355	2.00857	0.0445831	0.200526	0
ENSDARG00000028721	mapk14b	576.296	0.684077	0.341163	2.00513	0.0449488	0.201681	mitogen-activated protein kinase 14b [Source:NCBI gene;Acc:266756]
ENSDARG00000096031	si:ch73-6k14.2	10.7982	1.30903	0.653213	2.00399	0.0450714	NA	si:ch73-6k14.2 [Source:ZFIN;Acc:ZDB-GENE-110914-243]
ENSDARG00000099583	CABZ01034082.1	49.1063	1.66665	0.832821	2.00121	0.0453699	0.203079	0
ENSDARG00000076896	si:dkey-188g12.1	8.00882	3.639	1.81887	2.00069	0.0454254	NA	si:dkey-188g12.1 [Source:ZFIN;Acc:ZDB-GENE-070705-332]
ENSDARG00000045132	vdac1	1266.24	0.769911	0.384875	2.00042	0.0454552	0.203324	voltage-dependent anion channel 1 [Source:ZFIN;Acc:ZDB-GENE-030131-6514]
ENSDARG00000041417	atp6ap1a	1406.22	0.737013	0.368445	2.00033	0.0454645	0.203324	ATPase H+ transporting accessory protein 1a [Source:ZFIN;Acc:ZDB-GENE-090312-136]
ENSDARG00000067832	tle2c	147.071	0.76295	0.381714	1.99875	0.0456356	0.203732	TLE family member 2, transcriptional corepressor c [Source:ZFIN;Acc:ZDB-GENE-060512-84]
ENSDARG00000061852	olfml3a	35.9269	1.47568	0.738553	1.99807	0.0457095	0.204017	olfactomedin-like 3a [Source:NCBI gene;Acc:568106]
ENSDARG00000023861	dnase1l1l	3.94321	2.88154	1.44234	1.99782	0.0457359	NA	deoxyribonuclease I-like 1-like [Source:ZFIN;Acc:ZDB-GENE-040718-100]
ENSDARG00000002945	bgnb	233.523	0.841109	0.421026	1.99776	0.0457427	0.204068	biglycan b [Source:ZFIN;Acc:ZDB-GENE-040426-21]
ENSDARG00000105271	BX640522.1	247.614	0.959955	0.480522	1.99773	0.0457456	0.204068	septin 4b [Source:NCBI gene;Acc:100003446]
ENSDARG00000007697	fabp7a	1959.08	1.26895	0.635251	1.99755	0.0457651	0.204086	fatty acid binding protein 7, brain, a [Source:ZFIN;Acc:ZDB-GENE-000627-1]
ENSDARG00000063433	atp2b2	2199.76	2.29831	1.15106	1.99669	0.0458583	0.204273	ATPase plasma membrane Ca2+ transporting 2 [Source:ZFIN;Acc:ZDB-GENE-061016-1]
ENSDARG00000063446	iba57	172.961	0.672176	0.336658	1.99662	0.045867	0.204273	iron-sulfur cluster assembly factor IBA57 [Source:NCBI gene;Acc:100330979]
ENSDARG00000102358	si:dkey-261o4.9	3.26183	3.38067	1.69453	1.99505	0.046037	NA	si:dkey-261o4.9 [Source:ZFIN;Acc:ZDB-GENE-141211-1]
ENSDARG00000101767	si:dkey-183i3.6	66.2861	1.22646	0.614852	1.99473	0.0460723	0.204919	si:dkey-183i3.6 [Source:ZFIN;Acc:ZDB-GENE-141212-342]
ENSDARG00000101606	rims2a	480.314	1.80836	0.906645	1.99457	0.0460903	0.204935	regulating synaptic membrane exocytosis 2a [Source:ZFIN;Acc:ZDB-GENE-040426-1656]
ENSDARG00000094045	si:dkeyp-73d8.8	325.728	1.46841	0.736594	1.99351	0.0462052	0.205331	si:dkeyp-73d8.8 [Source:ZFIN;Acc:ZDB-GENE-070912-684]
ENSDARG00000094695	si:dkey-204f11.64	545.894	0.698295	0.350353	1.99312	0.0462484	0.205454	si:dkey-204f11.64 [Source:ZFIN;Acc:ZDB-GENE-030131-8332]
ENSDARG00000077690	mb21d2	163.03	2.90358	1.45715	1.99264	0.0463005	0.205526	Mab-21 domain containing 2 [Source:ZFIN;Acc:ZDB-GENE-081104-150]
ENSDARG00000028815	zgc:162945	72.4538	0.760702	0.381813	1.99234	0.0463339	0.205589	zgc:162945 [Source:ZFIN;Acc:ZDB-GENE-030131-3975]
ENSDARG00000024877	ptgr1	912.142	0.930351	0.467155	1.99152	0.0464233	0.205762	prostaglandin reductase 1 [Source:ZFIN;Acc:ZDB-GENE-041212-80]
ENSDARG00000092027	si:dkey-20i20.9	8.26412	1.9104	0.959402	1.99124	0.0464547	NA	si:dkey-20i20.9 [Source:ZFIN;Acc:ZDB-GENE-060503-152]
ENSDARG00000053152	pcmtd1	501.565	0.842704	0.423229	1.99113	0.0464664	0.205777	protein-L-isoaspartate (D-aspartate) O-methyltransferase domain containing 1 [Source:ZFIN;Acc:ZDB-GENE-030131-5387]
ENSDARG00000014941	tprkb	24.3402	0.732042	0.367705	1.99084	0.0464986	0.205783	Tp53rk binding protein [Source:NCBI gene;Acc:492501]
ENSDARG00000017058	large2	481.285	0.836998	0.420581	1.9901	0.0465798	0.206008	LARGE xylosyl- and glucuronyltransferase 2 [Source:NCBI gene;Acc:446214]
ENSDARG00000062042	mthfsd	37.478	1.35528	0.681129	1.98976	0.0466178	0.206063	methenyltetrahydrofolate synthetase domain containing [Source:NCBI gene;Acc:566203]
ENSDARG00000087573	hdac11	81.7056	1.08042	0.543066	1.98948	0.0466478	0.206085	histone deacetylase 11 [Source:ZFIN;Acc:ZDB-GENE-040704-7]
ENSDARG00000099169	cxcl8b.3	82.9854	1.18395	0.595414	1.98845	0.0467618	0.206365	chemokine (C-X-C motif) ligand 8b, duplicate 3 [Source:ZFIN;Acc:ZDB-GENE-111004-1]
ENSDARG00000052331	abcf2b	209.2	0.749475	0.376981	1.9881	0.0468012	0.20646	ATP-binding cassette, sub-family F (GCN20), member 2b [Source:ZFIN;Acc:ZDB-GENE-050506-58]
ENSDARG00000004187	zgc:122979	884.703	2.86821	1.44282	1.98792	0.0468201	0.20646	zgc:122979 [Source:ZFIN;Acc:ZDB-GENE-051127-45]
ENSDARG00000000369	prkag3b	19.2527	2.82579	1.4215	1.98789	0.0468237	0.20646	protein kinase, AMP-activated, gamma 3b non-catalytic subunit [Source:ZFIN;Acc:ZDB-GENE-060421-6938]
ENSDARG00000102626	frem2b	135.757	0.959981	0.483143	1.98695	0.0469277	0.206874	FRAS1 related extracellular matrix 2b [Source:ZFIN;Acc:ZDB-GENE-081119-4]
ENSDARG00000057435	amacr	190.977	0.628373	0.316321	1.9865	0.0469777	0.207004	alpha-methylacyl-CoA racemase [Source:ZFIN;Acc:ZDB-GENE-050522-484]
ENSDARG00000104989	wnk2	384.991	1.48954	0.749979	1.9861	0.0470218	0.207097	WNK lysine deficient protein kinase 2 [Source:ZFIN;Acc:ZDB-GENE-160114-3]
ENSDARG00000043648	pnck	10.8119	2.79809	1.40952	1.98514	0.0471291	NA	pregnancy up-regulated nonubiquitous CaM kinase [Source:ZFIN;Acc:ZDB-GENE-081105-127]
ENSDARG00000045929	oaz2a	3473.17	0.69834	0.351908	1.98444	0.0472066	0.207297	ornithine decarboxylase antizyme 2a [Source:ZFIN;Acc:ZDB-GENE-121005-1]
ENSDARG00000113721	HPDL	34.754	0.992097	0.500091	1.98383	0.0472744	0.207549	4-hydroxyphenylpyruvate dioxygenase-like protein [Source:NCBI gene;Acc:110438534]
ENSDARG00000074317	fam20ca	17.2872	1.41144	0.711544	1.98363	0.0472973	0.207605	FAM20C golgi associated secretory pathway kinase a [Source:ZFIN;Acc:ZDB-GENE-130530-750]
ENSDARG00000075834	si:dkey-182i3.8	64.4219	0.757818	0.382078	1.98341	0.0473215	0.207667	si:dkey-182i3.8 [Source:ZFIN;Acc:ZDB-GENE-030131-4134]
ENSDARG00000073883	clstn3	2125.59	0.910186	0.459132	1.98241	0.0474337	0.207977	calsyntenin 3 [Source:ZFIN;Acc:ZDB-GENE-100921-73]
ENSDARG00000019156	haus5	36.1052	2.17583	1.09762	1.98232	0.0474432	0.207977	HAUS augmin-like complex, subunit 5 [Source:ZFIN;Acc:ZDB-GENE-041114-150]
ENSDARG00000061099	nfasca	920.749	0.785552	0.396415	1.98164	0.0475197	0.20812	neurofascin homolog (chicken) a [Source:ZFIN;Acc:ZDB-GENE-080229-6]
ENSDARG00000053845	cbln14	951.457	1.04143	0.525555	1.98157	0.0475269	0.20812	cerebellin 14 [Source:ZFIN;Acc:ZDB-GENE-040724-5]
ENSDARG00000095539	si:dkeyp-82a1.8	3.72927	3.51605	1.77526	1.98058	0.0476384	NA	si:dkeyp-82a1.8 [Source:ZFIN;Acc:ZDB-GENE-081104-479]
ENSDARG00000011693	ttc36	806.41	0.937845	0.473647	1.98005	0.047698	0.208645	tetratricopeptide repeat domain 36 [Source:NCBI gene;Acc:492516]
ENSDARG00000070864	bcl6aa	538.221	1.07892	0.545051	1.97948	0.0477615	0.208785	BCL6A transcription repressor a [Source:ZFIN;Acc:ZDB-GENE-040426-1696]
ENSDARG00000059235	zgc:113274	61.1594	0.835632	0.422359	1.97849	0.0478735	0.209099	zgc:113274 [Source:ZFIN;Acc:ZDB-GENE-050508-2]
ENSDARG00000098849	SLC25A29	269.195	1.20243	0.608373	1.97646	0.0481022	0.209918	solute carrier family 25 member 29 [Source:NCBI gene;Acc:100329459]
ENSDARG00000036826	ankrd52a	120.971	0.602767	0.305024	1.97613	0.0481403	0.210039	ankyrin repeat domain 52a [Source:NCBI gene;Acc:553206]
ENSDARG00000057903	si:ch211-266g18.10	90.571	2.99394	1.51532	1.97579	0.048179	0.210163	si:ch211-266g18.10 [Source:ZFIN;Acc:ZDB-GENE-131127-188]
ENSDARG00000069100	aldh9a1a.1	6002.94	0.922004	0.466756	1.97534	0.0482291	0.210292	aldehyde dehydrogenase 9 family, member A1a, tandem duplicate 1 [Source:NCBI gene;Acc:100005587]
ENSDARG00000076895	flrt3	268.942	0.653747	0.331055	1.97474	0.0482982	0.210417	fibronectin leucine rich transmembrane 3 [Source:ZFIN;Acc:ZDB-GENE-030131-1988]
ENSDARG00000012353	vipr2	58.4089	0.709449	0.359358	1.97421	0.0483579	0.210494	vasoactive intestinal peptide receptor 2 [Source:ZFIN;Acc:ZDB-GENE-010406-4]
ENSDARG00000104963	BX511166.1	1.8248	2.84133	1.43937	1.974	0.0483812	NA	0
ENSDARG00000099616	FP236734.1	62.9705	1.74224	0.882661	1.97385	0.0483985	0.210625	0
ENSDARG00000093117	si:dkey-266m15.7	6.41113	2.88977	1.46516	1.97233	0.0485725	NA	si:dkey-266m15.7 [Source:ZFIN;Acc:ZDB-GENE-070705-444]
ENSDARG00000098315	cyp1a	4823.45	0.790386	0.400877	1.97164	0.0486504	0.211508	cytochrome P450, family 1, subfamily A [Source:ZFIN;Acc:ZDB-GENE-011219-1]
ENSDARG00000079840	kcnma1a	401.732	1.17536	0.596871	1.96921	0.0489295	0.212302	potassium large conductance calcium-activated channel, subfamily M, alpha member 1a [Source:ZFIN;Acc:ZDB-GENE-070202-9]
ENSDARG00000077400	rbm10	449.427	0.707322	0.359259	1.96884	0.0489718	0.212395	RNA binding motif protein 10 [Source:ZFIN;Acc:ZDB-GENE-100922-245]
ENSDARG00000069184	ubtd2	271.813	0.638045	0.324285	1.96754	0.0491206	0.212919	ubiquitin domain containing 2 [Source:NCBI gene;Acc:436991]
ENSDARG00000100482	pmt	5299.81	0.843586	0.42887	1.967	0.0491836	0.213087	phosphoethanolamine methyltransferase [Source:ZFIN;Acc:ZDB-GENE-060929-740]
ENSDARG00000102835	CABZ01021435.1	141.881	0.760009	0.386925	1.96423	0.0495035	0.214162	0
ENSDARG00000097420	si:ch73-250a16.5	48.992	1.35154	0.68808	1.96422	0.0495051	0.214162	si:ch73-250a16.5 [Source:ZFIN;Acc:ZDB-GENE-131121-255]
ENSDARG00000003576	klhl32	138.306	0.665808	0.339349	1.96201	0.049761	0.21495	kelch-like family member 32 [Source:ZFIN;Acc:ZDB-GENE-070209-47]
ENSDARG00000092726	si:dkey-184p9.7	110.043	1.73399	0.883802	1.96196	0.0497667	0.21495	si:dkey-184p9.7 [Source:ZFIN;Acc:ZDB-GENE-091204-97]

## Sheet: Down-regulated genes
Down-regulated DEGs in liver after overfeeding
	Gene name	baseMean	log2FoldChange	lfcSE	stat	pvalue	padj	Gene description
ENSDARG00000116139	cdx1b	679.898	-32.9687	2.06385	-15.9744	1.92704e-57	3.9298e-53	caudal type homeobox 1 b [Source:ZFIN;Acc:ZDB-GENE-070615-29]
ENSDARG00000053526	enpp7.1	2500.68	-32.1194	2.88452	-11.1351	8.46472e-29	1.91801e-25	ectonucleotide pyrophosphatase/phosphodiesterase 7, tandem duplicate 1 [Source:ZFIN;Acc:ZDB-GENE-040724-13]
ENSDARG00000060671	lct	1303.41	-23.957	2.77521	-8.63252	6.00155e-18	5.82808e-15	lactase [Source:ZFIN;Acc:ZDB-GENE-081104-434]
ENSDARG00000079393	tmprss15	638.942	-22.8022	1.71345	-13.3077	2.08686e-40	2.12786e-36	transmembrane serine protease 15 [Source:ZFIN;Acc:ZDB-GENE-091204-83]
ENSDARG00000079361	abcg2b	401.808	-21.9951	2.26285	-9.72005	2.4765e-22	4.5912e-19	ATP-binding cassette, sub-family G (WHITE), member 2b [Source:ZFIN;Acc:ZDB-GENE-050517-36]
ENSDARG00000053525	enpp7.2	545.682	-21.4753	2.2409	-9.58335	9.3944e-22	1.5965e-18	ectonucleotide pyrophosphatase/phosphodiesterase 7, tandem duplicate 2 [Source:ZFIN;Acc:ZDB-GENE-130531-2]
ENSDARG00000075698	nkpd1	346.543	-21.3815	2.23818	-9.55308	1.25902e-21	1.97501e-18	NTPase, KAP family P-loop domain containing 1 [Source:ZFIN;Acc:ZDB-GENE-141215-19]
ENSDARG00000042293	ca4b	471.245	-21.3238	2.14113	-9.95915	2.3003e-23	4.691e-20	carbonic anhydrase IV b [Source:ZFIN;Acc:ZDB-GENE-080815-5]
ENSDARG00000035832	pyyb	275.832	-20.7791	1.70594	-12.1804	3.95167e-34	2.01466e-30	peptide YYb [Source:ZFIN;Acc:ZDB-GENE-060215-2]
ENSDARG00000061355	aoc1	2655.33	-10.2083	1.64871	-6.19167	5.95315e-10	1.44527e-07	amine oxidase copper containing 1 [Source:ZFIN;Acc:ZDB-GENE-061103-112]
ENSDARG00000043729	plac8.1	2014.85	-10.1135	1.90656	-5.30459	1.12926e-07	1.16308e-05	placenta associated 8, tandem duplicate 1 [Source:ZFIN;Acc:ZDB-GENE-050809-124]
ENSDARG00000016918	ace2	16701.2	-9.97528	1.95625	-5.09918	3.41129e-07	2.8051e-05	angiotensin I converting enzyme 2 [Source:ZFIN;Acc:ZDB-GENE-041114-6]
ENSDARG00000032639	cd36	7413.9	-9.16176	1.49072	-6.14584	7.95407e-10	1.84327e-07	CD36 molecule (thrombospondin receptor) [Source:ZFIN;Acc:ZDB-GENE-040718-55]
ENSDARG00000077167	nmbb	86.407	-8.99823	1.7147	-5.2477	1.54013e-07	1.47455e-05	neuromedin Bb [Source:ZFIN;Acc:ZDB-GENE-081022-31]
ENSDARG00000101160	apoa4a	945.46	-8.61929	2.1407	-4.02639	5.66398e-05	0.0015883	apolipoprotein A-IV a [Source:ZFIN;Acc:ZDB-GENE-050417-469]
ENSDARG00000077688	cpo	1016.09	-8.57322	1.70251	-5.03562	4.76296e-07	3.59889e-05	carboxypeptidase O [Source:NCBI gene;Acc:100005630]
ENSDARG00000099185	chia.2	36086.6	-8.38875	1.97908	-4.23872	2.24796e-05	0.000747534	chitinase, acidic.2 [Source:ZFIN;Acc:ZDB-GENE-040426-2014]
ENSDARG00000022261	pdzk1	5166.68	-8.26426	1.44239	-5.72956	1.00689e-08	1.54387e-06	PDZ domain containing 1 [Source:ZFIN;Acc:ZDB-GENE-031222-1]
ENSDARG00000099539	dicp2.2	15.4325	-8.23408	1.94126	-4.24161	2.21923e-05	0.000741913	diverse immunoglobulin domain-containing protein 2.2 [Source:ZFIN;Acc:ZDB-GENE-120306-17]
ENSDARG00000051876	ush1c	942.719	-8.10816	1.70455	-4.75678	1.96707e-06	0.000114117	Usher syndrome 1C [Source:ZFIN;Acc:ZDB-GENE-060312-41]
ENSDARG00000034007	prom1b	123.473	-8.05311	1.81872	-4.4279	9.51548e-06	0.000376795	prominin 1 b [Source:ZFIN;Acc:ZDB-GENE-031003-1]
ENSDARG00000009612	chia.3	67547	-7.95207	2.19519	-3.6225	0.000291775	0.0054689	chitinase, acidic.3 [Source:ZFIN;Acc:ZDB-GENE-040426-2891]
ENSDARG00000056781	zanl	8770.08	-7.87315	1.38461	-5.68619	1.29907e-08	1.87145e-06	zonadhesin, like [Source:ZFIN;Acc:ZDB-GENE-060131-2]
ENSDARG00000115610	ccl25a	1102.56	-7.85598	1.50819	-5.20887	1.89992e-07	1.74527e-05	chemokine (C-C motif) ligand 25a [Source:ZFIN;Acc:ZDB-GENE-110222-1]
ENSDARG00000089050	cuzd1.1	8494.45	-7.80473	1.3526	-5.77015	7.91987e-09	1.27173e-06	CUB and zona pellucida-like domains 1, tandem duplicate 1 [Source:ZFIN;Acc:ZDB-GENE-131122-16]
ENSDARG00000100955	stk24a	574.026	-7.71297	2.00974	-3.83779	0.000124148	0.00288354	serine/threonine kinase 24a (STE20 homolog, yeast) [Source:ZFIN;Acc:ZDB-GENE-070424-52]
ENSDARG00000010276	ptgs2b	137.33	-7.67622	1.39574	-5.49974	3.80346e-08	4.64455e-06	prostaglandin-endoperoxide synthase 2b [Source:ZFIN;Acc:ZDB-GENE-041014-323]
ENSDARG00000102004	apoea	25170.2	-7.64355	2.31123	-3.30714	0.000942553	0.0132288	apolipoprotein Ea [Source:ZFIN;Acc:ZDB-GENE-010724-18]
ENSDARG00000091317	hunk	120.468	-7.5938	1.49662	-5.07397	3.89592e-07	3.10349e-05	hormonally up-regulated Neu-associated kinase [Source:ZFIN;Acc:ZDB-GENE-050309-240]
ENSDARG00000029747	mep1a.1	4043.57	-7.57972	1.53108	-4.95057	7.39983e-07	5.1203e-05	meprin A, alpha (PABA peptide hydrolase), tandem duplicate 1 [Source:ZFIN;Acc:ZDB-GENE-041001-209]
ENSDARG00000094438	plac8.2	795.111	-7.53564	2.1973	-3.42949	0.000604706	0.00937064	placenta associated 8, tandem duplicate 2 [Source:ZFIN;Acc:ZDB-GENE-070424-12]
ENSDARG00000037533	mep1b	3922.38	-7.49764	1.59215	-4.70913	2.48777e-06	0.000134928	meprin A, beta [Source:ZFIN;Acc:ZDB-GENE-041014-209]
ENSDARG00000043584	ifit15	563.192	-7.36708	1.72617	-4.26788	1.97336e-05	0.000677488	interferon-induced protein with tetratricopeptide repeats 15 [Source:ZFIN;Acc:ZDB-GENE-030131-1055]
ENSDARG00000053774	alpi.2	1438.44	-7.34101	1.82875	-4.01421	5.96447e-05	0.00165939	alkaline phosphatase, intestinal, tandem duplicate 2 [Source:ZFIN;Acc:ZDB-GENE-050626-142]
ENSDARG00000105416	adgrg4a	853.786	-7.24769	2.11524	-3.42642	0.000611604	0.00944882	adhesion G protein-coupled receptor G4a [Source:ZFIN;Acc:ZDB-GENE-121129-2]
ENSDARG00000045378	pi15a	19.3168	-7.21106	1.5661	-4.60448	4.13505e-06	0.000202221	peptidase inhibitor 15a [Source:NCBI gene;Acc:561978]
ENSDARG00000016290	clca1	2167.28	-7.15455	1.82629	-3.91753	8.94597e-05	0.00224674	chloride channel accessory 1 [Source:ZFIN;Acc:ZDB-GENE-030131-6221]
ENSDARG00000104795	cxcl8a	205.865	-6.90774	1.08047	-6.39327	1.62372e-10	4.30031e-08	chemokine (C-X-C motif) ligand 8a [Source:ZFIN;Acc:ZDB-GENE-081104-317]
ENSDARG00000062182	slc22a7b.3	676.229	-6.90376	1.63055	-4.23402	2.29552e-05	0.000758712	solute carrier family 22 member 7b, tandem duplicate 3 [Source:ZFIN;Acc:ZDB-GENE-131120-103]
ENSDARG00000098700	il1b	350.649	-6.86839	0.918857	-7.47493	7.7243e-14	3.84199e-11	interleukin 1, beta [Source:ZFIN;Acc:ZDB-GENE-040702-2]
ENSDARG00000069844	acod1	919.837	-6.84599	0.782509	-8.74876	2.15704e-18	2.44381e-15	aconitate decarboxylase 1 [Source:ZFIN;Acc:ZDB-GENE-081104-428]
ENSDARG00000068382	pglyrp5	37.4195	-6.81762	1.4549	-4.68597	2.78639e-06	0.0001457	peptidoglycan recognition protein 5 [Source:ZFIN;Acc:ZDB-GENE-050419-71]
ENSDARG00000044528	slc15a1b	5219.5	-6.758	1.49616	-4.51691	6.27497e-06	0.000278301	solute carrier family 15 member 1b [Source:ZFIN;Acc:ZDB-GENE-030131-4661]
ENSDARG00000071592	aqp8a.2	987.516	-6.70604	1.46946	-4.56362	5.02788e-06	0.000237897	aquaporin 8a, tandem duplicate 2 [Source:ZFIN;Acc:ZDB-GENE-070112-1802]
ENSDARG00000070368	casp6b.2	845.266	-6.5596	1.64403	-3.98995	6.60868e-05	0.0017733	caspase 6b.2, apoptosis-related cysteine peptidase [Source:ZFIN;Acc:ZDB-GENE-060312-12]
ENSDARG00000103459	evplb	1216.28	-6.53708	1.32821	-4.92171	8.57915e-07	5.81245e-05	envoplakin b [Source:ZFIN;Acc:ZDB-GENE-030131-212]
ENSDARG00000060116	camk1a	69.4615	-6.53509	1.67978	-3.89043	0.000100065	0.00244387	calcium/calmodulin-dependent protein kinase Ia [Source:ZFIN;Acc:ZDB-GENE-131120-147]
ENSDARG00000053853	slc13a2	17323.5	-6.47966	1.12653	-5.7519	8.8244e-09	1.40591e-06	solute carrier family 13 member 2 [Source:ZFIN;Acc:ZDB-GENE-040426-2389]
ENSDARG00000079166	ace	6240.22	-6.38542	1.07526	-5.93846	2.87705e-09	5.48333e-07	angiotensin I converting enzyme (peptidyl-dipeptidase A) 1 [Source:ZFIN;Acc:ZDB-GENE-030131-1826]
ENSDARG00000105731	CR788316.1	1492.92	-6.38471	1.64388	-3.88394	0.000102777	0.0024922	verrucotoxin subunit beta-like [Source:NCBI gene;Acc:103908715]
ENSDARG00000060315	rabgap1l2	384.503	-6.3756	1.53242	-4.16049	3.17565e-05	0.000994662	RAB GTPase activating protein 1-like 2 [Source:ZFIN;Acc:ZDB-GENE-070912-414]
ENSDARG00000008019	mxg	2805.43	-6.37233	1.41391	-4.5069	6.57805e-06	0.000289108	myxovirus (influenza virus) resistance G [Source:ZFIN;Acc:ZDB-GENE-030721-10]
ENSDARG00000006427	fabp2	23588	-6.36769	1.24857	-5.09998	3.39697e-07	2.80463e-05	fatty acid binding protein 2, intestinal [Source:ZFIN;Acc:ZDB-GENE-991019-5]
ENSDARG00000054184	btr06	205.469	-6.30488	1.62237	-3.88622	0.000101817	0.00247449	bloodthirsty-related gene family, member 6 [Source:ZFIN;Acc:ZDB-GENE-080516-2]
ENSDARG00000051874	stra6	340.53	-6.30081	1.58108	-3.98512	6.74468e-05	0.00180268	stimulated by retinoic acid 6 [Source:NCBI gene;Acc:724007]
ENSDARG00000004586	ntrk1	28.408	-6.24578	1.38278	-4.51682	6.27757e-06	0.000278301	neurotrophic tyrosine kinase, receptor, type 1 [Source:ZFIN;Acc:ZDB-GENE-980526-118]
ENSDARG00000012422	col11a2	131.906	-6.22816	1.12223	-5.54981	2.85976e-08	3.64494e-06	collagen, type XI, alpha 2 [Source:ZFIN;Acc:ZDB-GENE-000208-23]
ENSDARG00000074813	btr05	236.491	-6.18291	2.20998	-2.79772	0.00514647	0.0459308	bloodthirsty-related gene family, member 5 [Source:ZFIN;Acc:ZDB-GENE-080219-8]
ENSDARG00000091560	slc6a19a.2	1332.09	-6.09332	1.58874	-3.8353	0.00012541	0.00290294	solute carrier family 6 member 19a, tandem duplicate 2 [Source:ZFIN;Acc:ZDB-GENE-141210-16]
ENSDARG00000019228	mogat2	1046.55	-6.06398	1.46202	-4.14767	3.35877e-05	0.00103938	monoacylglycerol O-acyltransferase 2 [Source:ZFIN;Acc:ZDB-GENE-041010-186]
ENSDARG00000076685	ccn4b	37.1642	-6.05823	1.44018	-4.20657	2.59271e-05	0.000840592	cellular communication network factor 4b [Source:ZFIN;Acc:ZDB-GENE-080220-16]
ENSDARG00000019932	slc5a11	514.927	-6.02753	1.42966	-4.21607	2.48601e-05	0.000811154	solute carrier family 5 member 11 [Source:ZFIN;Acc:ZDB-GENE-041114-9]
ENSDARG00000005274	rad52	19.831	-5.97023	1.41769	-4.21125	2.53967e-05	0.000827339	RAD52 homolog, DNA repair protein [Source:ZFIN;Acc:ZDB-GENE-050731-10]
ENSDARG00000101164	nansb	2051.54	-5.86098	1.26987	-4.61541	3.92318e-06	0.000192784	N-acetylneuraminic acid synthase b [Source:ZFIN;Acc:ZDB-GENE-041114-125]
ENSDARG00000093078	plscr3a	965.35	-5.82353	1.37466	-4.23635	2.27178e-05	0.000753164	phospholipid scramblase 3a [Source:ZFIN;Acc:ZDB-GENE-060531-17]
ENSDARG00000043410	xkr6b	53.6015	-5.82045	1.56293	-3.72406	0.000196045	0.00407538	XK, Kell blood group complex subunit-related family, member 6b [Source:ZFIN;Acc:ZDB-GENE-040724-153]
ENSDARG00000086266	CR925773.1	59.4777	-5.80424	1.4195	-4.08894	4.33351e-05	0.00128263	caspase-3-like [Source:NCBI gene;Acc:798445]
ENSDARG00000012355	galnt8a.1	315.497	-5.75982	1.51863	-3.79277	0.000148975	0.00332027	polypeptide N-acetylgalactosaminyltransferase 8a, tandem duplicate 1 [Source:ZFIN;Acc:ZDB-GENE-091015-4]
ENSDARG00000069888	cldna	909.8	-5.74092	1.31886	-4.35296	1.34313e-05	0.000498009	claudin a [Source:ZFIN;Acc:ZDB-GENE-010328-1]
ENSDARG00000045999	saa	1570.4	-5.73976	1.04096	-5.51391	3.50942e-08	4.33743e-06	serum amyloid A [Source:ZFIN;Acc:ZDB-GENE-040927-15]
ENSDARG00000098752	csf3b	29.9636	-5.73673	1.22929	-4.6667	3.06081e-06	0.000157624	colony stimulating factor 3 (granulocyte) b [Source:ZFIN;Acc:ZDB-GENE-141212-221]
ENSDARG00000103019	gstp2	310.532	-5.71644	1.63715	-3.4917	0.000479953	0.00788693	glutathione S-transferase pi 2 [Source:ZFIN;Acc:ZDB-GENE-050601-1]
ENSDARG00000039436	il13ra2	333.212	-5.69253	0.746892	-7.62162	2.50504e-14	1.34435e-11	interleukin 13 receptor, alpha 2 [Source:ZFIN;Acc:ZDB-GENE-030521-10]
ENSDARG00000076140	clcf1	47.1265	-5.6633	1.5327	-3.69499	0.000219899	0.0044444	cardiotrophin-like cytokine factor 1 [Source:ZFIN;Acc:ZDB-GENE-110411-244]
ENSDARG00000112575	CU467905.1	781.27	-5.62746	1.08195	-5.20122	1.97986e-07	1.80247e-05	caspase 17, apoptosis-related cysteine peptidase [Source:NCBI gene;Acc:101886133]
ENSDARG00000068857	gbp4	63.9447	-5.60698	1.3839	-4.05157	5.08749e-05	0.00144699	guanylate binding protein 4 [Source:ZFIN;Acc:ZDB-GENE-060531-46]
ENSDARG00000014626	dlx3b	260.676	-5.56292	1.48847	-3.73734	0.00018598	0.00393024	distal-less homeobox 3b [Source:NCBI gene;Acc:30585]
ENSDARG00000026925	nos2a	555.294	-5.55823	1.43443	-3.87487	0.00010668	0.00256852	nitric oxide synthase 2a, inducible [Source:ZFIN;Acc:ZDB-GENE-040305-1]
ENSDARG00000055656	pdzd3b	207.84	-5.55496	1.84643	-3.00849	0.00262552	0.028495	PDZ domain containing 3b [Source:ZFIN;Acc:ZDB-GENE-081022-151]
ENSDARG00000044514	st6gal1	201.349	-5.55012	1.56927	-3.53675	0.000405083	0.00697707	ST6 beta-galactosamide alpha-2,6-sialyltranferase 1 [Source:ZFIN;Acc:ZDB-GENE-060322-3]
ENSDARG00000070810	ccka	129.903	-5.51356	1.45963	-3.77737	0.000158494	0.00346114	cholecystokinin a [Source:ZFIN;Acc:ZDB-GENE-100922-79]
ENSDARG00000073728	gal3st3	123.104	-5.51344	1.46071	-3.77451	0.000160324	0.00348187	galactose-3-O-sulfotransferase 3 [Source:ZFIN;Acc:ZDB-GENE-121001-3]
ENSDARG00000078309	fam83b	341.157	-5.43167	1.33098	-4.08097	4.48486e-05	0.00131678	family with sequence similarity 83 member B [Source:ZFIN;Acc:ZDB-GENE-030131-7066]
ENSDARG00000011273	tlx2	14.3666	-5.41859	1.63401	-3.31613	0.000912719	0.0129168	T cell leukemia homeobox 2 [Source:ZFIN;Acc:ZDB-GENE-020208-1]
ENSDARG00000016081	cldn15la	2954.42	-5.40598	1.03321	-5.23223	1.67478e-07	1.57953e-05	claudin 15-like a [Source:ZFIN;Acc:ZDB-GENE-010328-12]
ENSDARG00000014232	prkg3	610.881	-5.34255	1.3614	-3.92431	8.69796e-05	0.00220345	protein kinase cGMP-dependent 3 [Source:ZFIN;Acc:ZDB-GENE-030131-4745]
ENSDARG00000038700	gpr160	135.77	-5.30555	1.34934	-3.93197	8.42537e-05	0.00214505	G protein-coupled receptor 160 [Source:ZFIN;Acc:ZDB-GENE-081022-189]
ENSDARG00000012903	slc34a2a	4658.44	-5.30325	1.12719	-4.70485	2.5405e-06	0.000137059	solute carrier family 34 member 2a [Source:ZFIN;Acc:ZDB-GENE-000524-1]
ENSDARG00000053010	lpcat2	334.579	-5.19334	0.64112	-8.10042	5.4771e-16	4.13684e-13	lysophosphatidylcholine acyltransferase 2 [Source:NCBI gene;Acc:553683]
ENSDARG00000041294	noxo1a	1092.61	-5.19028	0.619795	-8.37419	5.56048e-17	4.93021e-14	NADPH oxidase organizer 1a [Source:ZFIN;Acc:ZDB-GENE-030131-9700]
ENSDARG00000075975	slc45a3	97.0218	-5.1669	0.689561	-7.49303	6.73003e-14	3.43114e-11	solute carrier family 45 member 3 [Source:ZFIN;Acc:ZDB-GENE-070509-3]
ENSDARG00000025311	cuzd1.2	1935.85	-5.16259	1.13161	-4.56215	5.06315e-06	0.000239011	CUB and zona pellucida-like domains 1, tandem duplicate 2 [Source:ZFIN;Acc:ZDB-GENE-131119-30]
ENSDARG00000077308	gpr84	233.991	-5.14797	0.796616	-6.4623	1.03125e-10	3.04786e-08	G protein-coupled receptor 84 [Source:ZFIN;Acc:ZDB-GENE-070928-33]
ENSDARG00000078297	ptprh	276.631	-5.14579	1.43337	-3.58998	0.000330702	0.00599467	protein tyrosine phosphatase receptor type H [Source:ZFIN;Acc:ZDB-GENE-091118-90]
ENSDARG00000056374	noxo1b	25.2064	-5.14508	1.61159	-3.19254	0.00141027	0.0179187	NADPH oxidase organizer 1b [Source:ZFIN;Acc:ZDB-GENE-101203-1]
ENSDARG00000086705	prob1	96.212	-5.10905	1.40512	-3.63603	0.000276877	0.00524754	proline-rich basic protein 1 [Source:ZFIN;Acc:ZDB-GENE-050309-179]
ENSDARG00000000212	krt97	10234.5	-5.10792	0.820654	-6.2242	4.84026e-10	1.18925e-07	keratin 97 [Source:ZFIN;Acc:ZDB-GENE-040718-78]
ENSDARG00000053454	cntn3b	67.6268	-5.08453	1.37807	-3.6896	0.000224607	0.00451273	contactin 3b [Source:ZFIN;Acc:ZDB-GENE-130530-645]
ENSDARG00000098837	tgm5l	76.6191	-5.04263	1.62334	-3.10634	0.00189421	0.0223416	transglutaminase 5, like [Source:ZFIN;Acc:ZDB-GENE-110411-176]
ENSDARG00000093370	lrrc66	90.5349	-5.03598	1.48298	-3.39586	0.000684132	0.0103115	leucine rich repeat containing 66 [Source:ZFIN;Acc:ZDB-GENE-070705-240]
ENSDARG00000100223	gpa33a	523.475	-5.02056	1.30294	-3.85325	0.00011656	0.00274798	glycoprotein A33 (transmembrane), paralog a [Source:ZFIN;Acc:ZDB-GENE-080229-4]
ENSDARG00000116066	MFAP4	32.8133	-5.0097	1.76884	-2.8322	0.00462295	0.0426806	microfibril-associated glycoprotein 4-like [Source:NCBI gene;Acc:100334800]
ENSDARG00000052322	tlr5b	2431.86	-4.98547	0.748069	-6.66445	2.65665e-11	9.02951e-09	toll-like receptor 5b [Source:ZFIN;Acc:ZDB-GENE-040219-15]
ENSDARG00000054898	ms4a17a.16	495.591	-4.93726	1.35667	-3.63926	0.000273424	0.00521584	membrane-spanning 4-domains, subfamily A, member 17A.16 [Source:ZFIN;Acc:ZDB-GENE-060825-240]
ENSDARG00000114554	cdx1a	759.495	-4.92171	1.2395	-3.97072	7.16572e-05	0.00190027	caudal type homeobox 1a [Source:ZFIN;Acc:ZDB-GENE-050510-1]
ENSDARG00000095378	gdf10a	60.1209	-4.89774	1.32232	-3.7039	0.000212306	0.00433824	growth differentiation factor 10a [Source:ZFIN;Acc:ZDB-GENE-090312-17]
ENSDARG00000100086	adipoqb	83.704	-4.89541	1.28664	-3.80481	0.000141913	0.0031932	adiponectin, C1Q and collagen domain containing, b [Source:ZFIN;Acc:ZDB-GENE-060825-220]
ENSDARG00000104384	agbl1	145.068	-4.89263	1.65199	-2.96166	0.00305982	0.0318037	ATP/GTP binding protein-like 1 [Source:ZFIN;Acc:ZDB-GENE-110207-1]
ENSDARG00000092774	tars3	336.352	-4.892	1.28281	-3.81349	0.000137016	0.00310119	threonyl-tRNA synthetase 3 [Source:ZFIN;Acc:ZDB-GENE-081104-490]
ENSDARG00000009544	cldnb	2883.82	-4.87316	0.921198	-5.29002	1.22302e-07	1.24084e-05	claudin b [Source:ZFIN;Acc:ZDB-GENE-010328-2]
ENSDARG00000078828	npb	218.036	-4.8604	1.72087	-2.82438	0.00473723	0.0435164	neuropeptide B [Source:ZFIN;Acc:ZDB-GENE-040107-40]
ENSDARG00000012829	asah2	1836.27	-4.8521	1.10738	-4.38158	1.1782e-05	0.000450789	N-acylsphingosine amidohydrolase 2 [Source:NCBI gene;Acc:493602]
ENSDARG00000052336	ociad2	747.563	-4.81029	1.24937	-3.85018	0.00011803	0.00277302	OCIA domain containing 2 [Source:ZFIN;Acc:ZDB-GENE-041014-253]
ENSDARG00000103951	tspan34	1349.4	-4.80198	1.36971	-3.50584	0.000455176	0.00756188	tetraspanin 34 [Source:ZFIN;Acc:ZDB-GENE-060825-202]
ENSDARG00000009471	nid2b	30.6728	-4.78725	1.41924	-3.37311	0.000743233	0.0110142	nidogen 2b (osteonidogen) [Source:ZFIN;Acc:ZDB-GENE-040724-143]
ENSDARG00000068220	mbl2	2521.15	-4.7758	1.19078	-4.01065	6.0552e-05	0.00167113	mannose binding lectin 2 [Source:ZFIN;Acc:ZDB-GENE-000427-2]
ENSDARG00000013871	slc5a1	8678.3	-4.76889	0.992092	-4.8069	1.53285e-06	9.41449e-05	solute carrier family 5 member 1 [Source:ZFIN;Acc:ZDB-GENE-040426-1524]
ENSDARG00000069027	admb	64.6747	-4.76523	1.24534	-3.82646	0.000130001	0.00298548	adrenomedullin b [Source:ZFIN;Acc:ZDB-GENE-120221-6]
ENSDARG00000022183	gsto1	882.909	-4.69081	1.14103	-4.11103	3.93897e-05	0.00118652	glutathione S-transferase omega 1 [Source:ZFIN;Acc:ZDB-GENE-040718-365]
ENSDARG00000076614	ssuh2.3	30.5046	-4.6904	1.00961	-4.64574	3.38861e-06	0.000171901	ssu-2 homolog, tandem duplicate 3 [Source:ZFIN;Acc:ZDB-GENE-080516-4]
ENSDARG00000098463	gig2g	53.8376	-4.68564	1.48943	-3.14592	0.00165565	0.0202241	grass carp reovirus (GCRV)-induced gene 2g [Source:ZFIN;Acc:ZDB-GENE-130517-4]
ENSDARG00000102114	ptdss1b	114.885	-4.65091	1.31768	-3.52963	0.000416135	0.00710146	phosphatidylserine synthase 1b [Source:ZFIN;Acc:ZDB-GENE-081031-18]
ENSDARG00000055288	prelid3a	129.135	-4.63345	0.890405	-5.20376	1.95301e-07	1.786e-05	PRELI domain containing 3A [Source:ZFIN;Acc:ZDB-GENE-130530-654]
ENSDARG00000061762	trim108	97.7259	-4.61233	1.07576	-4.2875	1.80699e-05	0.000632073	tripartite motif containing 108 [Source:ZFIN;Acc:ZDB-GENE-060503-670]
ENSDARG00000063435	trpm4b.2	253.604	-4.61228	1.4452	-3.19146	0.00141557	0.0179637	transient receptor potential cation channel, subfamily M, member 4b, transient receptor potential cation channel, subfamily M, member 4b, tandem duplicate 2 [Source:ZFIN;Acc:ZDB-GENE-061214-2]
ENSDARG00000093750	cd180	38.1451	-4.5988	1.3455	-3.41791	0.000631044	0.00970504	CD180 molecule [Source:ZFIN;Acc:ZDB-GENE-070705-323]
ENSDARG00000100846	fgf21	21.2096	-4.58529	0.934495	-4.9067	9.26205e-07	6.16139e-05	fibroblast growth factor 21 [Source:ZFIN;Acc:ZDB-GENE-060623-2]
ENSDARG00000101040	ccl20a.3	119.68	-4.56674	0.64205	-7.11276	1.13749e-12	4.63935e-10	chemokine (C-C motif) ligand 20a, duplicate 3 [Source:ZFIN;Acc:ZDB-GENE-081022-193]
ENSDARG00000037861	slc2a3b	236.6	-4.56669	0.741595	-6.15793	7.37025e-10	1.74769e-07	solute carrier family 2 member 3b [Source:ZFIN;Acc:ZDB-GENE-121031-5]
ENSDARG00000101910	pcdh20	159.162	-4.54658	1.30651	-3.47993	0.000501537	0.00814968	protocadherin 20 [Source:ZFIN;Acc:ZDB-GENE-091204-115]
ENSDARG00000043128	cldne	574.26	-4.5266	1.33908	-3.38037	0.000723886	0.0107675	claudin e [Source:ZFIN;Acc:ZDB-GENE-010328-5]
ENSDARG00000045051	slc16a3	415.814	-4.52371	1.06943	-4.23003	2.33663e-05	0.000768562	solute carrier family 16 member 3 [Source:ZFIN;Acc:ZDB-GENE-030131-5487]
ENSDARG00000044094	gfpt2	1877.23	-4.52016	0.93462	-4.83636	1.32237e-06	8.34895e-05	glutamine-fructose-6-phosphate transaminase 2 [Source:ZFIN;Acc:ZDB-GENE-071113-1]
ENSDARG00000001414	mctp2a	54.4218	-4.50823	1.27723	-3.52968	0.000416059	0.00710146	multiple C2 domains, transmembrane 2a [Source:ZFIN;Acc:ZDB-GENE-040724-63]
ENSDARG00000063153	bcl11ab	52.5617	-4.50393	1.28976	-3.49206	0.00047931	0.00788272	BAF chromatin remodeling complex subunit BCL11A b [Source:ZFIN;Acc:ZDB-GENE-061009-4]
ENSDARG00000042350	syt1b	21.4012	-4.4916	1.56987	-2.86113	0.00422134	0.0398838	synaptotagmin Ib [Source:ZFIN;Acc:ZDB-GENE-060503-166]
ENSDARG00000033735	ncf1	1652.2	-4.47697	0.833477	-5.37144	7.81124e-08	8.55527e-06	neutrophil cytosolic factor 1 [Source:ZFIN;Acc:ZDB-GENE-031006-6]
ENSDARG00000097683	sptbn5	3051.46	-4.45366	0.893612	-4.98389	6.23194e-07	4.47493e-05	spectrin, beta, non-erythrocytic 5 [Source:ZFIN;Acc:ZDB-GENE-131121-26]
ENSDARG00000005221	desmb	729.839	-4.4457	1.25476	-3.54307	0.000395493	0.00684659	desmin b [Source:ZFIN;Acc:ZDB-GENE-061027-102]
ENSDARG00000019396	rergla	177.679	-4.44179	1.3526	-3.28389	0.00102386	0.0140603	RERG/RAS-like a [Source:NCBI gene;Acc:436767]
ENSDARG00000040606	tfap2c	373.241	-4.41453	0.972091	-4.54128	5.59144e-06	0.000259151	transcription factor AP-2 gamma (activating enhancer binding protein 2 gamma) [Source:ZFIN;Acc:ZDB-GENE-041212-61]
ENSDARG00000045638	slc13a1	1216.15	-4.41409	1.12272	-3.93159	8.43847e-05	0.00214571	solute carrier family 13 member 1 [Source:ZFIN;Acc:ZDB-GENE-031222-3]
ENSDARG00000117144	CT573337.1	135.907	-4.41056	0.866977	-5.08729	3.63221e-07	2.93473e-05	endonuclease domain-containing 1 protein-like [Source:NCBI gene;Acc:100002544]
ENSDARG00000042285	atp8b3	84.7714	-4.40932	0.995449	-4.42948	9.44615e-06	0.000375508	ATPase phospholipid transporting 8B3 [Source:ZFIN;Acc:ZDB-GENE-050208-424]
ENSDARG00000032344	pde4a	520.764	-4.40849	1.2568	-3.5077	0.000451993	0.00753063	phosphodiesterase 4A, cAMP-specific [Source:ZFIN;Acc:ZDB-GENE-131125-7]
ENSDARG00000103983	slc30a10	1274.37	-4.40547	1.08689	-4.05327	5.05073e-05	0.00144055	solute carrier family 30 member 10 [Source:ZFIN;Acc:ZDB-GENE-060608-2]
ENSDARG00000079647	muc13b	5010.51	-4.3518	0.859318	-5.06425	4.10005e-07	3.20684e-05	mucin 13b, cell surface associated [Source:ZFIN;Acc:ZDB-GENE-080220-61]
ENSDARG00000042861	ltk	103.913	-4.3231	0.756355	-5.7157	1.09253e-08	1.63178e-06	leukocyte receptor tyrosine kinase [Source:ZFIN;Acc:ZDB-GENE-030616-115]
ENSDARG00000101990	CU571315.3	245.419	-4.30575	1.5078	-2.85564	0.00429497	0.0403814	serine protease 27-like [Source:NCBI gene;Acc:100004427]
ENSDARG00000103878	anpepb	13808.3	-4.30205	0.894205	-4.81103	1.50152e-06	9.30712e-05	alanyl (membrane) aminopeptidase b [Source:ZFIN;Acc:ZDB-GENE-030131-1253]
ENSDARG00000043814	st6galnac1.1	327.785	-4.29219	1.22347	-3.5082	0.000451143	0.00752877	ST6 (alpha-N-acetyl-neuraminyl-2,3-beta-galactosyl-1,3)-N-acetylgalactosaminide alpha-2,6-sialyltransferase 1, tandem duplicate 1 [Source:ZFIN;Acc:ZDB-GENE-041014-160]
ENSDARG00000068088	tcnba	3819.13	-4.28955	0.868588	-4.93853	7.87117e-07	5.4046e-05	transcobalamin beta a [Source:ZFIN;Acc:ZDB-GENE-060531-123]
ENSDARG00000100465	clrn3	1042.89	-4.27849	1.31454	-3.25475	0.00113491	0.0151766	clarin 3 [Source:ZFIN;Acc:ZDB-GENE-170623-3]
ENSDARG00000058603	jph1a	153.871	-4.26966	1.28632	-3.31928	0.000902485	0.0127808	junctophilin 1a [Source:ZFIN;Acc:ZDB-GENE-040724-233]
ENSDARG00000089800	prr7	77.4996	-4.26434	1.45823	-2.92433	0.00345198	0.0346294	proline rich 7 (synaptic) [Source:ZFIN;Acc:ZDB-GENE-101006-6]
ENSDARG00000099233	si:zfos-2372e4.1	66.7927	-4.26167	1.41809	-3.00521	0.00265401	0.0287279	si:zfos-2372e4.1 [Source:ZFIN;Acc:ZDB-GENE-131127-560]
ENSDARG00000115608	BX649608.2	36.062	-4.25785	1.12609	-3.78109	0.000156143	0.00343128	claudin-1-like [Source:NCBI gene;Acc:101883865]
ENSDARG00000111942	sptbn4b	83.7012	-4.2214	1.34965	-3.12777	0.00176141	0.0211296	spectrin, beta, non-erythrocytic 4b [Source:ZFIN;Acc:ZDB-GENE-081031-8]
ENSDARG00000077866	nostrin	104.884	-4.21812	1.38634	-3.04262	0.0023453	0.0261783	nitric oxide synthase trafficking [Source:ZFIN;Acc:ZDB-GENE-070522-2]
ENSDARG00000032714	gria1b	204.399	-4.20122	1.51305	-2.77666	0.00549206	0.0482341	glutamate receptor, ionotropic, AMPA 1b [Source:ZFIN;Acc:ZDB-GENE-020125-2]
ENSDARG00000028096	cldn23a	119.269	-4.18585	1.51553	-2.76197	0.0057454	0.049802	claudin 23a [Source:ZFIN;Acc:ZDB-GENE-091204-28]
ENSDARG00000058327	neu3.3	467.282	-4.18278	0.982269	-4.25829	2.06001e-05	0.000698999	sialidase 3 (membrane sialidase), tandem duplicate 3 [Source:ZFIN;Acc:ZDB-GENE-061103-511]
ENSDARG00000098791	cdhr5b	1480.01	-4.15754	0.874074	-4.7565	1.96976e-06	0.000114117	cadherin-related family member 5b [Source:ZFIN;Acc:ZDB-GENE-110518-2]
ENSDARG00000075159	meltf	2291.76	-4.09117	1.12376	-3.64061	0.000271988	0.00519836	melanotransferrin [Source:ZFIN;Acc:ZDB-GENE-050309-40]
ENSDARG00000103485	card14	82.0315	-4.08194	1.34926	-3.02531	0.00248375	0.027301	caspase recruitment domain family, member 14 [Source:ZFIN;Acc:ZDB-GENE-090310-1]
ENSDARG00000097292	slc26a6	242.105	-4.07051	1.38213	-2.94511	0.00322845	0.0330843	solute carrier family 26 member 6 [Source:ZFIN;Acc:ZDB-GENE-081105-83]
ENSDARG00000015527	CU929145.1	20.3948	-4.05942	1.37185	-2.95909	0.0030855	0.0320217	myeloid-associated differentiation marker-like protein 2 [Source:NCBI gene;Acc:101882206]
ENSDARG00000060682	agr1	244.971	-4.05883	1.32026	-3.07426	0.00211024	0.0241088	anterior gradient 1 [Source:ZFIN;Acc:ZDB-GENE-030131-7249]
ENSDARG00000043182	hhla2a.1	100.814	-4.04876	1.02829	-3.93737	8.23794e-05	0.00211042	HERV-H LTR-associating 2a, tandem duplicate 1 [Source:ZFIN;Acc:ZDB-GENE-050327-45]
ENSDARG00000087873	eevs	32.4322	-4.03295	1.34955	-2.98837	0.0028047	0.0297826	2-epi-5-epi-valiolone synthase [Source:ZFIN;Acc:ZDB-GENE-131121-365]
ENSDARG00000034207	cx44.2	109.532	-4.02086	0.988753	-4.06659	4.77057e-05	0.00138191	connexin 44.2 [Source:ZFIN;Acc:ZDB-GENE-010619-1]
ENSDARG00000016483	baiap2l2a	625.689	-4.00946	1.22392	-3.27591	0.00105323	0.0143477	BAR/IMD domain containing adaptor protein 2 like 2a [Source:ZFIN;Acc:ZDB-GENE-040108-10]
ENSDARG00000077861	sowahaa	42.2077	-4.00065	1.30378	-3.06851	0.0021513	0.0245092	sosondowah ankyrin repeat domain family member Aa [Source:ZFIN;Acc:ZDB-GENE-100910-3]
ENSDARG00000054890	rgra	53.0836	-3.9931	1.21796	-3.27851	0.00104356	0.014254	retinal G protein coupled receptor a [Source:ZFIN;Acc:ZDB-GENE-040924-6]
ENSDARG00000059423	prune2	680.269	-3.99292	1.07734	-3.70629	0.000210317	0.00430189	prune homolog 2 with BCH domain [Source:ZFIN;Acc:ZDB-GENE-050309-222]
ENSDARG00000094433	caspbl	94.612	-3.98398	1.33494	-2.98439	0.00284143	0.0300639	caspase b, like [Source:ZFIN;Acc:ZDB-GENE-090311-53]
ENSDARG00000012426	neflb	284.574	-3.98201	1.2651	-3.1476	0.00164619	0.0202241	neurofilament, light polypeptide b [Source:ZFIN;Acc:ZDB-GENE-060312-44]
ENSDARG00000102175	hamp	3988.16	-3.97488	0.796052	-4.99324	5.93745e-07	4.30898e-05	hepcidin antimicrobial peptide [Source:NCBI gene;Acc:402837]
ENSDARG00000075580	lrch2	34.7574	-3.97454	0.916943	-4.33456	1.46053e-05	0.000528096	leucine-rich repeats and calponin homology (CH) domain containing 2 [Source:ZFIN;Acc:ZDB-GENE-080114-1]
ENSDARG00000110366	FO904880.1	24.3572	-3.97211	1.32831	-2.99034	0.00278665	0.0297063	cytochrome P450 2J6-like [Source:NCBI gene;Acc:103909721]
ENSDARG00000075450	mkxa	115.802	-3.96195	0.872148	-4.54275	5.55255e-06	0.000257934	mohawk homeobox a [Source:ZFIN;Acc:ZDB-GENE-080513-1]
ENSDARG00000040474	snx10b	34.2967	-3.96071	0.800075	-4.95042	7.40523e-07	5.1203e-05	sorting nexin 10b [Source:NCBI gene;Acc:569469]
ENSDARG00000091660	fgfbp1b	59.658	-3.95857	1.35779	-2.91545	0.0035518	0.0353536	fibroblast growth factor binding protein 1b [Source:ZFIN;Acc:ZDB-GENE-081106-1]
ENSDARG00000028507	itgb4	1820.01	-3.9152	0.818603	-4.78278	1.72887e-06	0.000102587	integrin, beta 4 [Source:ZFIN;Acc:ZDB-GENE-030131-7209]
ENSDARG00000052039	caspb	139.636	-3.91165	1.40845	-2.77726	0.00548188	0.0481862	caspase b [Source:ZFIN;Acc:ZDB-GENE-020812-1]
ENSDARG00000086826	sult6b1	2534.06	-3.88967	0.486106	-8.0017	1.22711e-15	8.34151e-13	sulfotransferase family, cytosolic, 6b, member 1 [Source:NCBI gene;Acc:322462]
ENSDARG00000075539	snphb	184.674	-3.88695	1.35115	-2.87677	0.00401767	0.0385714	syntaphilin b [Source:ZFIN;Acc:ZDB-GENE-090313-92]
ENSDARG00000102776	cxcl19	312.458	-3.88359	1.24043	-3.13083	0.0017431	0.0209841	chemokine (C-X-C motif) ligand 19 [Source:ZFIN;Acc:ZDB-GENE-140708-2]
ENSDARG00000089936	selenow2b	152.802	-3.86654	1.36852	-2.82534	0.00472302	0.0434446	selenoprotein W, 2b [Source:ZFIN;Acc:ZDB-GENE-030428-2]
ENSDARG00000002216	tbx3a	141.959	-3.86477	0.871865	-4.43276	9.30327e-06	0.000371275	T-box transcription factor 3a [Source:ZFIN;Acc:ZDB-GENE-070209-80]
ENSDARG00000102442	folr	591.062	-3.86326	1.31268	-2.94302	0.00325023	0.033224	folate receptor [Source:ZFIN;Acc:ZDB-GENE-070615-23]
ENSDARG00000028625	jph2	422.531	-3.86027	1.33838	-2.8843	0.00392289	0.0378965	junctophilin 2 [Source:ZFIN;Acc:ZDB-GENE-030131-9848]
ENSDARG00000004015	adcyap1a	137.952	-3.85818	1.28599	-3.00016	0.00269839	0.029054	adenylate cyclase activating polypeptide 1a [Source:ZFIN;Acc:ZDB-GENE-020809-4]
ENSDARG00000090785	diaph3	25.4842	-3.85744	1.37312	-2.80925	0.00496575	0.0449474	diaphanous-related formin 3 [Source:ZFIN;Acc:ZDB-GENE-040801-144]
ENSDARG00000098269	slc1a9	32.5519	-3.85582	1.31729	-2.92708	0.00342159	0.0344392	solute carrier family 1 member 9 [Source:ZFIN;Acc:ZDB-GENE-101111-9]
ENSDARG00000059960	plch2a	631.564	-3.85578	1.00866	-3.82267	0.000132017	0.00301143	phospholipase C, eta 2a [Source:ZFIN;Acc:ZDB-GENE-030131-6367]
ENSDARG00000094579	b4galnt2.1	161.747	-3.85157	1.1879	-3.24233	0.00118555	0.0156485	beta-1,4-N-acetyl-galactosaminyl transferase 2, tandem duplicate 1 [Source:ZFIN;Acc:ZDB-GENE-030131-9081]
ENSDARG00000017649	cdh7b	13.1055	-3.84618	1.32589	-2.90083	0.00372175	0.0364717	cadherin 7b [Source:ZFIN;Acc:ZDB-GENE-171002-1]
ENSDARG00000051880	kcnj11	52.8286	-3.83991	1.26738	-3.02979	0.00244721	0.0270054	potassium inwardly rectifying channel subfamily J member 11 [Source:ZFIN;Acc:ZDB-GENE-060308-2]
ENSDARG00000074185	pcsk9	198.683	-3.82696	1.21986	-3.13722	0.00170558	0.0206789	proprotein convertase subtilisin/kexin type 9 [Source:ZFIN;Acc:ZDB-GENE-060927-1]
ENSDARG00000018153	nt5c1ba	165.188	-3.82267	1.32291	-2.88959	0.00385739	0.0374233	5'-nucleotidase, cytosolic IB a [Source:ZFIN;Acc:ZDB-GENE-070424-103]
ENSDARG00000058601	gdap1	246.569	-3.80983	1.23845	-3.07628	0.00209603	0.0240002	ganglioside induced differentiation associated protein 1 [Source:ZFIN;Acc:ZDB-GENE-050522-424]
ENSDARG00000075045	cxcl18b	1231.31	-3.80239	0.662052	-5.74334	9.28259e-09	1.45615e-06	chemokine (C-X-C motif) ligand 18b [Source:ZFIN;Acc:ZDB-GENE-090313-165]
ENSDARG00000102447	gdpd4a	97.4901	-3.80168	1.25807	-3.02184	0.0025124	0.0275015	glycerophosphodiester phosphodiesterase domain containing 4a [Source:ZFIN;Acc:ZDB-GENE-091204-436]
ENSDARG00000006522	otop2	197.829	-3.78711	1.25828	-3.00975	0.00261463	0.0284071	otopetrin 2 [Source:ZFIN;Acc:ZDB-GENE-050104-2]
ENSDARG00000079324	ano9b	404.329	-3.78395	0.485158	-7.79941	6.21953e-15	3.73044e-12	anoctamin 9b [Source:ZFIN;Acc:ZDB-GENE-121106-2]
ENSDARG00000060813	plekha7a	370.586	-3.76182	0.535025	-7.0311	2.04907e-12	7.8843e-10	pleckstrin homology domain containing, family A member 7a [Source:NCBI gene;Acc:571486]
ENSDARG00000076952	fer1l4	98.9453	-3.75775	0.92599	-4.05809	4.94762e-05	0.00141709	fer-1 like family member 4 [Source:ZFIN;Acc:ZDB-GENE-130530-815]
ENSDARG00000056018	itga6l	494.486	-3.75131	1.18369	-3.16915	0.00152885	0.0191198	integrin, alpha 6, like [Source:ZFIN;Acc:ZDB-GENE-040914-57]
ENSDARG00000089131	il17rel	122.652	-3.7494	1.19817	-3.12929	0.00175232	0.0210454	interleukin 17 receptor E-like [Source:ZFIN;Acc:ZDB-GENE-120112-1]
ENSDARG00000070339	hoxc3a	147.198	-3.74816	1.27705	-2.93502	0.00333525	0.0338591	homeobox C3a [Source:NCBI gene;Acc:30421]
ENSDARG00000025302	dixdc1a	241.727	-3.74661	1.25133	-2.99409	0.00275262	0.0294513	DIX domain containing 1a [Source:NCBI gene;Acc:360137]
ENSDARG00000055313	slc12a10.1	42.3593	-3.7381	1.05092	-3.55698	0.000375138	0.00656054	solute carrier family 12 member 10, tandem duplicate 1 [Source:ZFIN;Acc:ZDB-GENE-060503-330]
ENSDARG00000062135	sytl5	90.9199	-3.72848	1.24463	-2.99565	0.00273864	0.0293717	synaptotagmin-like 5 [Source:ZFIN;Acc:ZDB-GENE-070912-424]
ENSDARG00000102300	ca9	84.6108	-3.71053	1.29008	-2.8762	0.0040249	0.0385714	carbonic anhydrase IX [Source:ZFIN;Acc:ZDB-GENE-080818-5]
ENSDARG00000018619	cers4b	97.4303	-3.69109	1.31373	-2.80962	0.00495999	0.0449474	ceramide synthase 4b [Source:ZFIN;Acc:ZDB-GENE-110719-2]
ENSDARG00000108535	CABZ01072077.1	599.335	-3.68405	1.32687	-2.7765	0.00549475	0.0482369	neuroblast differentiation-associated protein AHNAK-like [Source:NCBI gene;Acc:795051]
ENSDARG00000015793	creb3l1	119.857	-3.68384	1.32702	-2.77603	0.0055027	0.048286	cAMP responsive element binding protein 3-like 1 [Source:ZFIN;Acc:ZDB-GENE-030219-181]
ENSDARG00000036846	anks4b	1131.01	-3.67996	0.729475	-5.04467	4.54316e-07	3.50413e-05	ankyrin repeat and sterile alpha motif domain containing 4B [Source:ZFIN;Acc:ZDB-GENE-040704-29]
ENSDARG00000104687	slc16a9b	214.979	-3.67138	0.972952	-3.77344	0.00016101	0.00349307	solute carrier family 16 member 9b [Source:ZFIN;Acc:ZDB-GENE-040801-69]
ENSDARG00000030687	phka2	1353.26	-3.66875	0.54257	-6.76181	1.36281e-11	4.96283e-09	phosphorylase kinase, alpha 2 (liver) [Source:ZFIN;Acc:ZDB-GENE-130422-1]
ENSDARG00000062109	shdb	68.8759	-3.62784	1.11228	-3.26164	0.00110772	0.014891	Src homology 2 domain containing transforming protein D, b [Source:ZFIN;Acc:ZDB-GENE-030131-6059]
ENSDARG00000104256	bco1	1625.59	-3.62333	0.85437	-4.24094	2.22583e-05	0.000742904	beta-carotene oxygenase 1 [Source:ZFIN;Acc:ZDB-GENE-010508-1]
ENSDARG00000011886	pdca	16.2337	-3.62123	1.01233	-3.57713	0.00034739	0.00620888	phosducin a [Source:ZFIN;Acc:ZDB-GENE-031023-1]
ENSDARG00000024546	pla2g4aa	147.487	-3.61835	0.506558	-7.14302	9.13029e-13	3.96157e-10	phospholipase A2, group IVAa (cytosolic, calcium-dependent) [Source:NCBI gene;Acc:30554]
ENSDARG00000038006	osr2	259.227	-3.61557	1.02683	-3.52108	0.000429786	0.00724948	odd-skipped related transciption factor 2 [Source:NCBI gene;Acc:550389]
ENSDARG00000059956	ptk6b	1855.54	-3.60577	0.808643	-4.45904	8.23292e-06	0.000341248	PTK6 protein tyrosine kinase 6b [Source:ZFIN;Acc:ZDB-GENE-060929-1150]
ENSDARG00000019316	fer1l6	143.075	-3.60529	1.26767	-2.84404	0.00445458	0.0415184	fer-1 like family member 6 [Source:ZFIN;Acc:ZDB-GENE-070912-312]
ENSDARG00000031136	moxd1	427.995	-3.60078	0.561357	-6.41442	1.41356e-10	3.9132e-08	monooxygenase, DBH-like 1 [Source:NCBI gene;Acc:570584]
ENSDARG00000088595	crispld2	89.8242	-3.5766	0.989122	-3.61594	0.000299263	0.00556323	cysteine-rich secretory protein LCCL domain containing 2 [Source:ZFIN;Acc:ZDB-GENE-130131-1]
ENSDARG00000102435	plekhf1	166.593	-3.57483	0.702186	-5.09101	3.56157e-07	2.90525e-05	pleckstrin homology domain containing, family F (with FYVE domain) member 1 [Source:ZFIN;Acc:ZDB-GENE-040426-1289]
ENSDARG00000043281	stap2b	304.51	-3.57458	0.789391	-4.52828	5.9466e-06	0.000268726	signal transducing adaptor family member 2b [Source:ZFIN;Acc:ZDB-GENE-040426-2540]
ENSDARG00000079296	gcga	106.611	-3.57388	0.858929	-4.16085	3.17067e-05	0.000994662	glucagon a [Source:ZFIN;Acc:ZDB-GENE-010219-1]
ENSDARG00000005704	eps8l3b	1432.78	-3.55147	0.452618	-7.84651	4.27784e-15	2.66939e-12	EPS8-like 3b [Source:ZFIN;Acc:ZDB-GENE-040426-1335]
ENSDARG00000026335	susd4	264.636	-3.53438	1.19869	-2.94853	0.00319293	0.0328027	sushi domain containing 4 [Source:NCBI gene;Acc:560304]
ENSDARG00000027777	tnfaip3	246.511	-3.52488	0.572893	-6.15278	7.61365e-10	1.78466e-07	tumor necrosis factor, alpha-induced protein 3 [Source:ZFIN;Acc:ZDB-GENE-100212-2]
ENSDARG00000075265	plaua	52.1433	-3.52364	0.818467	-4.30517	1.6686e-05	0.000588716	plasminogen activator, urokinase a [Source:ZFIN;Acc:ZDB-GENE-090313-278]
ENSDARG00000079834	kdf1a	56.5386	-3.52243	1.27168	-2.76991	0.00560724	0.04888	keratinocyte differentiation factor 1a [Source:ZFIN;Acc:ZDB-GENE-110411-156]
ENSDARG00000114454	CR762483.1	229.296	-3.49241	0.651467	-5.36084	8.28363e-08	8.98553e-06	growth-regulated alpha protein-like [Source:NCBI gene;Acc:101883994]
ENSDARG00000115573	CR759836.1	615.176	-3.49188	0.818897	-4.26412	2.00689e-05	0.00068784	5-hydroxytryptamine receptor 3A-like [Source:NCBI gene;Acc:101885757]
ENSDARG00000033227	lect2l	9766.98	-3.47925	0.994014	-3.5002	0.000464905	0.00768923	leukocyte cell-derived chemotaxin 2 like [Source:ZFIN;Acc:ZDB-GENE-070127-4]
ENSDARG00000074782	adgrg3	106.198	-3.45858	0.736606	-4.69529	2.66232e-06	0.000141387	adhesion G protein-coupled receptor G3 [Source:ZFIN;Acc:ZDB-GENE-140106-110]
ENSDARG00000076914	lacc1	114.185	-3.45441	0.785695	-4.39663	1.09947e-05	0.000424649	laccase (multicopper oxidoreductase) domain containing 1 [Source:ZFIN;Acc:ZDB-GENE-081104-155]
ENSDARG00000062855	plekhg7	263.716	-3.44664	0.947829	-3.63635	0.000276531	0.00524585	pleckstrin homology domain containing, family G (with RhoGef domain) member 7 [Source:ZFIN;Acc:ZDB-GENE-070410-15]
ENSDARG00000013056	itpk1a	1697.51	-3.4401	0.580633	-5.92474	3.12786e-09	5.85196e-07	inositol-tetrakisphosphate 1-kinase a [Source:NCBI gene;Acc:406290]
ENSDARG00000060879	slc28a1	475.521	-3.42215	0.962023	-3.55725	0.000374763	0.00656011	solute carrier family 28 member 1 [Source:ZFIN;Acc:ZDB-GENE-050419-117]
ENSDARG00000059805	slc25a38a	659.148	-3.40623	0.774004	-4.40079	1.07857e-05	0.000418655	solute carrier family 25 member 38a [Source:NCBI gene;Acc:767662]
ENSDARG00000007709	adamts8a	84.2898	-3.38364	1.0276	-3.29276	0.000992088	0.0137164	ADAM metallopeptidase with thrombospondin type 1 motif, 8a [Source:ZFIN;Acc:ZDB-GENE-060526-202]
ENSDARG00000062788	irg1l	578.828	-3.38171	1.01489	-3.33209	0.000861967	0.0123182	immunoresponsive gene 1, like [Source:ZFIN;Acc:ZDB-GENE-061103-301]
ENSDARG00000100315	slc15a1a	1097.98	-3.37654	1.10374	-3.05919	0.00221939	0.0250609	solute carrier family 15 member 1a [Source:ZFIN;Acc:ZDB-GENE-091204-9]
ENSDARG00000037873	cyp3c3	1810.88	-3.37176	0.688448	-4.89762	9.70021e-07	6.36066e-05	cytochrome P450, family 3, subfamily c, polypeptide 3 [Source:ZFIN;Acc:ZDB-GENE-041114-102]
ENSDARG00000068181	dpep1	1852.93	-3.35186	0.718539	-4.66483	3.08876e-06	0.000158264	dipeptidase 1 [Source:ZFIN;Acc:ZDB-GENE-061013-388]
ENSDARG00000060106	crb2a	39.8856	-3.34982	0.908841	-3.68582	0.000227967	0.00455831	crumbs cell polarity complex component 2a [Source:ZFIN;Acc:ZDB-GENE-060612-1]
ENSDARG00000074771	ifngr1	167.908	-3.34951	0.766929	-4.36743	1.25716e-05	0.000473013	interferon gamma receptor 1 [Source:ZFIN;Acc:ZDB-GENE-081022-158]
ENSDARG00000007769	sult5a1	69.7572	-3.33422	0.649176	-5.13607	2.80538e-07	2.39373e-05	sulfotransferase family 5A, member 1 [Source:ZFIN;Acc:ZDB-GENE-060929-978]
ENSDARG00000057121	c7b	9040.39	-3.33214	0.782094	-4.26054	2.03933e-05	0.000695453	complement component 7b [Source:ZFIN;Acc:ZDB-GENE-021120-1]
ENSDARG00000056108	ndufa4	2994.85	-3.33047	0.56409	-5.90415	3.54476e-09	6.57166e-07	NADH:ubiquinone oxidoreductase subunit A4 [Source:NCBI gene;Acc:406298]
ENSDARG00000029308	prr15lb	474.222	-3.32249	0.844284	-3.93527	8.31036e-05	0.00212372	proline rich 15 like b [Source:NCBI gene;Acc:550400]
ENSDARG00000103476	trpm1b	59.1839	-3.32198	0.610048	-5.44544	5.16786e-08	6.0568e-06	transient receptor potential cation channel, subfamily M, member 1b [Source:ZFIN;Acc:ZDB-GENE-070424-31]
ENSDARG00000005481	nfkbiaa	961.67	-3.31871	0.621562	-5.33931	9.33024e-08	9.90998e-06	nuclear factor of kappa light polypeptide gene enhancer in B-cells inhibitor, alpha a [Source:ZFIN;Acc:ZDB-GENE-040426-2227]
ENSDARG00000079420	dpp4	1282.04	-3.30927	0.795381	-4.16061	3.17399e-05	0.000994662	dipeptidyl-peptidase 4 [Source:ZFIN;Acc:ZDB-GENE-081104-277]
ENSDARG00000061357	chst6	98.5571	-3.30412	0.736239	-4.48783	7.19509e-06	0.000309706	carbohydrate sulfotransferase 6 [Source:ZFIN;Acc:ZDB-GENE-060810-74]
ENSDARG00000061120	slc43a2b	5919.1	-3.30329	0.626483	-5.27276	1.34389e-07	1.34343e-05	solute carrier family 43 member 2b [Source:ZFIN;Acc:ZDB-GENE-041212-6]
ENSDARG00000031702	prkg1b	103.307	-3.29686	1.07988	-3.05299	0.00226577	0.0254858	protein kinase cGMP-dependent 1b [Source:ZFIN;Acc:ZDB-GENE-080225-40]
ENSDARG00000007823	atf3	556.103	-3.29036	0.636689	-5.16792	2.36715e-07	2.108e-05	activating transcription factor 3 [Source:ZFIN;Acc:ZDB-GENE-040426-728]
ENSDARG00000043581	gadd45aa	263.018	-3.2878	0.434005	-7.5755	3.5775e-14	1.87066e-11	growth arrest and DNA-damage-inducible, alpha, a [Source:ZFIN;Acc:ZDB-GENE-040426-1501]
ENSDARG00000093303	ifitm1	2637.69	-3.28689	0.578224	-5.68446	1.3123e-08	1.87145e-06	interferon induced transmembrane protein 1 [Source:ZFIN;Acc:ZDB-GENE-060526-259]
ENSDARG00000058160	tnfaip2b	205.374	-3.27734	0.73059	-4.48588	7.26121e-06	0.000310503	tumor necrosis factor, alpha-induced protein 2b [Source:ZFIN;Acc:ZDB-GENE-081107-56]
ENSDARG00000038574	scg2b	2653.43	-3.27461	0.80563	-4.06466	4.81019e-05	0.00138747	secretogranin II (chromogranin C), b [Source:ZFIN;Acc:ZDB-GENE-061103-160]
ENSDARG00000091996	tcnbb	750.892	-3.2737	0.912668	-3.58696	0.000334561	0.00605385	transcobalamin beta b [Source:ZFIN;Acc:ZDB-GENE-030131-12]
ENSDARG00000016570	prlra	216.975	-3.2708	0.889093	-3.67881	0.000234327	0.00465301	prolactin receptor a [Source:ZFIN;Acc:ZDB-GENE-080103-2]
ENSDARG00000039272	pls1	1828	-3.25358	0.838853	-3.8786	0.000105058	0.00254147	plastin 1 (I isoform) [Source:ZFIN;Acc:ZDB-GENE-030131-6205]
ENSDARG00000016981	bcar3	1018.39	-3.252	0.687176	-4.73241	2.21869e-06	0.000123961	BCAR3 adaptor protein, NSP family member [Source:ZFIN;Acc:ZDB-GENE-080513-4]
ENSDARG00000034896	ldb2b	182.901	-3.24713	0.810092	-4.00835	6.11447e-05	0.00167839	LIM domain binding 2b [Source:ZFIN;Acc:ZDB-GENE-990415-137]
ENSDARG00000003808	aqp3a	1848.96	-3.24488	0.7116	-4.55997	5.11599e-06	0.000240948	aquaporin 3a [Source:ZFIN;Acc:ZDB-GENE-040426-2826]
ENSDARG00000018757	klf5l	690.032	-3.24359	0.720277	-4.50325	6.69215e-06	0.000291966	Kruppel-like factor 5 like [Source:ZFIN;Acc:ZDB-GENE-060312-34]
ENSDARG00000001870	atp1a1a.4	5916.71	-3.23326	0.875874	-3.69146	0.000222967	0.00448861	ATPase Na+/K+ transporting subunit alpha 1a, tandem duplicate 4 [Source:ZFIN;Acc:ZDB-GENE-001212-4]
ENSDARG00000003697	slc5a8l	1069.6	-3.23107	0.872471	-3.70335	0.000212772	0.00433905	solute carrier family 5 member 8, like [Source:NCBI gene;Acc:556156]
ENSDARG00000045190	ch25h	73.2297	-3.21944	0.921552	-3.4935	0.000476733	0.00784666	cholesterol 25-hydroxylase [Source:NCBI gene;Acc:494109]
ENSDARG00000054616	cldni	1255.57	-3.20892	0.892286	-3.5963	0.000322779	0.00590883	claudin i [Source:ZFIN;Acc:ZDB-GENE-010328-9]
ENSDARG00000044655	st14b	666.171	-3.18601	0.673089	-4.73341	2.20777e-06	0.000123961	suppression of tumorigenicity 14b [Source:ZFIN;Acc:ZDB-GENE-061103-613]
ENSDARG00000075977	prr5a	144.461	-3.16934	0.675796	-4.68978	2.73493e-06	0.000144117	proline rich 5a (renal) [Source:ZFIN;Acc:ZDB-GENE-130530-791]
ENSDARG00000093640	ugt5a2	119.41	-3.15807	0.546329	-5.78053	7.44654e-09	1.20522e-06	UDP glucuronosyltransferase 5 family, polypeptide A2 [Source:ZFIN;Acc:ZDB-GENE-061103-373]
ENSDARG00000104359	anxa1c	778.256	-3.15667	1.13517	-2.7808	0.00542247	0.0477669	annexin A1c [Source:ZFIN;Acc:ZDB-GENE-030131-5274]
ENSDARG00000053005	cd22	97.9588	-3.14617	0.522091	-6.0261	1.67962e-09	3.45985e-07	cd22 molecule [Source:ZFIN;Acc:ZDB-GENE-050522-521]
ENSDARG00000058371	krt5	49955.8	-3.14249	0.539308	-5.82689	5.64698e-09	9.36251e-07	keratin 5 [Source:ZFIN;Acc:ZDB-GENE-991110-23]
ENSDARG00000035578	hs3st1l2	180.994	-3.1394	0.516752	-6.07526	1.23785e-09	2.6756e-07	heparan sulfate (glucosamine) 3-O-sulfotransferase 1-like 2 [Source:ZFIN;Acc:ZDB-GENE-070202-3]
ENSDARG00000053131	irak3	174.608	-3.13345	0.51231	-6.11631	9.57654e-10	2.13606e-07	interleukin-1 receptor-associated kinase 3 [Source:ZFIN;Acc:ZDB-GENE-060503-710]
ENSDARG00000058218	fam151a	413.543	-3.12918	0.689376	-4.53915	5.64823e-06	0.000260598	family with sequence similarity 151 member A [Source:NCBI gene;Acc:100005645]
ENSDARG00000078363	mcoln3a	41.6786	-3.12534	0.657565	-4.75289	2.00527e-06	0.000115519	mucolipin 3a [Source:ZFIN;Acc:ZDB-GENE-121116-4]
ENSDARG00000038814	myrip	242.39	-3.125	1.05742	-2.95531	0.00312358	0.0323018	Danio rerio myosin VIIA and Rab interacting protein (myrip), mRNA. [Source:RefSeq mRNA;Acc:NM_001353925]
ENSDARG00000015653	tnip1	5659.43	-3.10986	0.475968	-6.53376	6.41387e-11	2.04372e-08	TNFAIP3 interacting protein 1 [Source:ZFIN;Acc:ZDB-GENE-070112-1502]
ENSDARG00000059305	tmem37	412.251	-3.10269	0.825945	-3.75654	0.000172281	0.00369046	transmembrane protein 37 [Source:ZFIN;Acc:ZDB-GENE-040426-2208]
ENSDARG00000104188	fam83fb	395.498	-3.0594	0.981647	-3.1166	0.00182952	0.0217548	family with sequence similarity 83 member Fb [Source:ZFIN;Acc:ZDB-GENE-041114-194]
ENSDARG00000105322	klhdc7a	71.3376	-3.04726	0.827278	-3.68348	0.000230072	0.00459085	kelch domain containing 7A [Source:ZFIN;Acc:ZDB-GENE-160114-44]
ENSDARG00000036943	golph3l	470.564	-3.02058	0.663648	-4.55148	5.32698e-06	0.000249731	golgi phosphoprotein 3-like [Source:ZFIN;Acc:ZDB-GENE-051113-168]
ENSDARG00000016364	gna15.1	116.368	-3.01562	0.552032	-5.46277	4.68774e-08	5.61064e-06	guanine nucleotide binding protein (G protein), alpha 15 (Gq class), tandem duplicate 1 [Source:ZFIN;Acc:ZDB-GENE-040801-146]
ENSDARG00000039034	marcksl1a	1911.93	-3.00683	0.407346	-7.3815	1.56514e-13	7.42278e-11	MARCKS-like 1a [Source:NCBI gene;Acc:406407]
ENSDARG00000059993	trpm4a	338.471	-3.00652	0.861625	-3.48936	0.000484174	0.00792437	transient receptor potential cation channel, subfamily M, member 4a [Source:ZFIN;Acc:ZDB-GENE-090302-3]
ENSDARG00000062974	itga2.2	92.0006	-3.00559	1.03717	-2.89787	0.00375703	0.0367644	integrin, alpha 2 (CD49B, alpha 2 subunit of VLA-2 receptor), tandem duplicate 2 [Source:ZFIN;Acc:ZDB-GENE-091118-70]
ENSDARG00000021383	naalad2	700.584	-2.98888	0.835085	-3.57914	0.000344732	0.00618304	N-acetylated alpha-linked acidic dipeptidase 2 [Source:ZFIN;Acc:ZDB-GENE-040426-1025]
ENSDARG00000026049	mxf	174.341	-2.9827	0.63624	-4.68801	2.75876e-06	0.000144999	myxovirus (influenza virus) resistance F [Source:ZFIN;Acc:ZDB-GENE-030721-9]
ENSDARG00000042577	batf3	49.7828	-2.97188	0.556411	-5.34116	9.2353e-08	9.8605e-06	basic leucine zipper transcription factor, ATF-like 3 [Source:ZFIN;Acc:ZDB-GENE-041014-356]
ENSDARG00000088515	st6gal2b	248.472	-2.96851	0.835259	-3.554	0.000379416	0.00661559	ST6 beta-galactosamide alpha-2,6-sialyltranferase 2b [Source:ZFIN;Acc:ZDB-GENE-120426-2]
ENSDARG00000036082	tph1b	63.8661	-2.95925	1.01838	-2.90585	0.00366255	0.0361172	tryptophan hydroxylase 1b [Source:ZFIN;Acc:ZDB-GENE-030805-6]
ENSDARG00000023587	kcnk5a	334.339	-2.95721	0.799344	-3.69954	0.00021599	0.00438154	potassium channel, subfamily K, member 5a [Source:ZFIN;Acc:ZDB-GENE-051113-112]
ENSDARG00000007040	tmigd1	733.968	-2.95525	0.88525	-3.33832	0.000842869	0.0120876	transmembrane and immunoglobulin domain containing 1 [Source:ZFIN;Acc:ZDB-GENE-080303-6]
ENSDARG00000112859	RASSF10	46.8927	-2.95335	0.645654	-4.57421	4.7803e-06	0.000227768	Ras association domain family member 10b [Source:NCBI gene;Acc:335170]
ENSDARG00000068275	ptx3a	272.748	-2.93582	0.927794	-3.1643	0.00155456	0.0193306	pentraxin 3, long a [Source:ZFIN;Acc:ZDB-GENE-030131-8720]
ENSDARG00000033587	CABZ01088134.1	65.2089	-2.93565	0.57934	-5.06722	4.03657e-07	3.17829e-05	enoyl-[acyl-carrier-protein] reductase, mitochondrial-like [Source:NCBI gene;Acc:101884755]
ENSDARG00000042370	ptafr	19.2532	-2.92981	0.698099	-4.19684	2.70663e-05	0.000874744	platelet-activating factor receptor [Source:ZFIN;Acc:ZDB-GENE-131127-236]
ENSDARG00000017790	chrnb2	209.434	-2.91968	0.843044	-3.46325	0.000533686	0.00854274	cholinergic receptor, nicotinic, beta 2 [Source:ZFIN;Acc:ZDB-GENE-070821-3]
ENSDARG00000024746	hsp90aa1.2	1847.94	-2.91446	0.742187	-3.92685	8.60674e-05	0.00218577	heat shock protein 90, alpha (cytosolic), class A member 1, tandem duplicate 2 [Source:ZFIN;Acc:ZDB-GENE-031001-3]
ENSDARG00000073743	slc25a37	40.9243	-2.90895	0.621353	-4.68164	2.84593e-06	0.000148209	solute carrier family 25 member 37 [Source:NCBI gene;Acc:387000]
ENSDARG00000101479	BX908782.2	30147.1	-2.90487	0.967458	-3.00258	0.00267697	0.0288844	CD59 glycoprotein-like [Source:NCBI gene;Acc:103910140]
ENSDARG00000017427	phf20l1	1855.91	-2.90401	0.750413	-3.86988	0.000108887	0.00260627	PHD finger protein 20 like 1 [Source:ZFIN;Acc:ZDB-GENE-030131-5837]
ENSDARG00000063307	sgsm2	111.145	-2.9037	0.787809	-3.68579	0.000227994	0.00455831	small G protein signaling modulator 2 [Source:ZFIN;Acc:ZDB-GENE-131119-52]
ENSDARG00000039881	cemip	331.422	-2.89934	0.541883	-5.3505	8.7712e-08	9.41427e-06	cell migration inducing hyaluronidase 1 [Source:ZFIN;Acc:ZDB-GENE-130103-7]
ENSDARG00000106873	LO018188.1	124.646	-2.89787	0.832862	-3.47942	0.000502503	0.00815885	synaptopodin [Source:NCBI gene;Acc:100536545]
ENSDARG00000060113	znf395a	594.68	-2.8953	0.748145	-3.86997	0.000108849	0.00260627	zinc finger protein 395a [Source:ZFIN;Acc:ZDB-GENE-061215-52]
ENSDARG00000102995	rbm24a	259.587	-2.89394	0.827274	-3.49816	0.000468475	0.00774198	RNA binding motif protein 24a [Source:NCBI gene;Acc:405801]
ENSDARG00000019307	dusp5	298.028	-2.89039	0.723799	-3.99336	6.51425e-05	0.0017518	dual specificity phosphatase 5 [Source:ZFIN;Acc:ZDB-GENE-010625-1]
ENSDARG00000100972	myh11b	245.788	-2.88807	0.560866	-5.1493	2.61461e-07	2.27862e-05	myosin, heavy chain 11b, smooth muscle [Source:ZFIN;Acc:ZDB-GENE-101124-2]
ENSDARG00000116837	CABZ01040055.1	126.058	-2.88322	0.996704	-2.89276	0.00381878	0.0371547	three-finger protein 5 [Source:NCBI gene;Acc:100003647]
ENSDARG00000017047	slc27a4	217.586	-2.87971	0.560189	-5.1406	2.73869e-07	2.35654e-05	solute carrier family 27 member 4 [Source:ZFIN;Acc:ZDB-GENE-050417-248]
ENSDARG00000052652	fermt1	157.159	-2.87287	0.623883	-4.60482	4.12831e-06	0.000202221	fermitin family member 1 [Source:ZFIN;Acc:ZDB-GENE-030131-3264]
ENSDARG00000055523	slc22a6l	362.415	-2.86948	0.986644	-2.90832	0.00363373	0.0359213	solute carrier family 22 member 6, like [Source:NCBI gene;Acc:404609]
ENSDARG00000067859	scospondin	69.505	-2.86818	0.993646	-2.88652	0.00389525	0.0376652	subcommissural organ spondin [Source:ZFIN;Acc:ZDB-GENE-051114-1]
ENSDARG00000014386	galnt6	474.807	-2.86009	0.658967	-4.34027	1.42308e-05	0.000518229	UDP-N-acetyl-alpha-D-galactosamine:polypeptide N-acetylgalactosaminyltransferase 6 (GalNAc-T6) [Source:ZFIN;Acc:ZDB-GENE-040426-2272]
ENSDARG00000018923	fat2	1497.07	-2.85078	0.807643	-3.52975	0.000415953	0.00710146	FAT atypical cadherin 2 [Source:ZFIN;Acc:ZDB-GENE-111031-1]
ENSDARG00000027867	paplna	86.5089	-2.84636	0.837444	-3.39887	0.000676647	0.0102112	papilin a, proteoglycan-like sulfated glycoprotein [Source:ZFIN;Acc:ZDB-GENE-070815-4]
ENSDARG00000031737	pthlha	26.339	-2.84496	1.0151	-2.80263	0.00506876	0.0454961	parathyroid hormone-like hormone a [Source:ZFIN;Acc:ZDB-GENE-050119-9]
ENSDARG00000087863	cd44a	419.51	-2.83939	0.678986	-4.18181	2.89202e-05	0.000927312	CD44 molecule (Indian blood group) a [Source:ZFIN;Acc:ZDB-GENE-110429-1]
ENSDARG00000032868	pde4ba	2158.98	-2.83386	0.370006	-7.65895	1.87452e-14	1.03317e-11	phosphodiesterase 4B, cAMP-specific a [Source:ZFIN;Acc:ZDB-GENE-030131-9570]
ENSDARG00000003902	ctsl.1	9228.63	-2.80878	0.783656	-3.58419	0.00033812	0.00610742	cathepsin L.1 [Source:ZFIN;Acc:ZDB-GENE-040718-61]
ENSDARG00000005210	coro2a	427.438	-2.80211	0.741876	-3.77706	0.00015869	0.00346114	coronin, actin binding protein, 2A [Source:ZFIN;Acc:ZDB-GENE-030131-2258]
ENSDARG00000001953	pfkfb3	1525.9	-2.79484	0.937111	-2.9824	0.00285996	0.0302036	6-phosphofructo-2-kinase/fructose-2,6-biphosphatase 3 [Source:ZFIN;Acc:ZDB-GENE-040426-2724]
ENSDARG00000042338	lpar2a	262.304	-2.78835	0.645834	-4.31744	1.57848e-05	0.000562762	lysophosphatidic acid receptor 2a [Source:ZFIN;Acc:ZDB-GENE-040801-97]
ENSDARG00000101102	tprn	161.827	-2.77925	0.86958	-3.19608	0.00139307	0.0177444	taperin [Source:ZFIN;Acc:ZDB-GENE-081104-254]
ENSDARG00000067672	card9	105.97	-2.77768	0.613189	-4.52989	5.9015e-06	0.000268039	caspase recruitment domain family, member 9 [Source:ZFIN;Acc:ZDB-GENE-060531-94]
ENSDARG00000039100	jac7	318.061	-2.77636	0.502878	-5.52095	3.37177e-08	4.21844e-06	jacalin 7 [Source:ZFIN;Acc:ZDB-GENE-080219-24]
ENSDARG00000078433	spc25	290.164	-2.74868	0.908763	-3.02464	0.00248933	0.0273371	SPC25 component of NDC80 kinetochore complex [Source:ZFIN;Acc:ZDB-GENE-060810-13]
ENSDARG00000010266	igf2bp3	241.275	-2.7451	0.551369	-4.9787	6.40122e-07	4.56434e-05	insulin-like growth factor 2 mRNA binding protein 3 [Source:NCBI gene;Acc:30967]
ENSDARG00000056590	calca	310.799	-2.73587	0.405984	-6.73885	1.59641e-11	5.61302e-09	calcitonin/calcitonin-related polypeptide, alpha [Source:ZFIN;Acc:ZDB-GENE-040718-173]
ENSDARG00000071462	lama3	475.839	-2.73355	0.661609	-4.13167	3.6014e-05	0.00109945	laminin, alpha 3 [Source:ZFIN;Acc:ZDB-GENE-050208-475]
ENSDARG00000112049	cldn15a	661.877	-2.73175	0.764581	-3.57287	0.000353084	0.00628859	claudin 15a [Source:ZFIN;Acc:ZDB-GENE-040426-1305]
ENSDARG00000032630	neb	2124.56	-2.72874	0.868692	-3.1412	0.00168257	0.0204729	nebulin [Source:ZFIN;Acc:ZDB-GENE-041111-216]
ENSDARG00000054827	ssuh2.4	179.43	-2.71865	0.596981	-4.554	5.26361e-06	0.000247329	ssu-2 homolog, tandem duplicate 4 [Source:ZFIN;Acc:ZDB-GENE-070424-72]
ENSDARG00000058943	cdcp1a	172.17	-2.70848	0.523191	-5.17684	2.2567e-07	2.03037e-05	CUB domain containing protein 1a [Source:ZFIN;Acc:ZDB-GENE-050327-55]
ENSDARG00000052088	cxcr1	45.5855	-2.7076	0.726277	-3.72806	0.000192958	0.00404389	chemokine (C-X-C motif) receptor 1 [Source:ZFIN;Acc:ZDB-GENE-070302-4]
ENSDARG00000059003	strip2	279.877	-2.70424	0.699491	-3.86601	0.000110629	0.00262944	striatin interacting protein 2 [Source:ZFIN;Acc:ZDB-GENE-120328-1]
ENSDARG00000022698	lad1	1209.62	-2.70234	0.6825	-3.95947	7.51148e-05	0.00197399	ladinin [Source:ZFIN;Acc:ZDB-GENE-030616-268]
ENSDARG00000021590	magi2a	193.863	-2.6959	0.830219	-3.24722	0.00116537	0.0154824	membrane associated guanylate kinase, WW and PDZ domain containing 2a [Source:ZFIN;Acc:ZDB-GENE-050810-4]
ENSDARG00000002021	pygb	1289.66	-2.68627	0.419751	-6.39967	1.55714e-10	4.17826e-08	phosphorylase, glycogen; brain [Source:ZFIN;Acc:ZDB-GENE-040928-2]
ENSDARG00000044415	tlr5a	185.027	-2.67187	0.544908	-4.90334	9.42201e-07	6.23841e-05	toll-like receptor 5a [Source:ZFIN;Acc:ZDB-GENE-040219-14]
ENSDARG00000055901	steap4	22117.4	-2.67033	0.567785	-4.70305	2.56299e-06	0.000137545	STEAP family member 4 [Source:ZFIN;Acc:ZDB-GENE-070424-244]
ENSDARG00000043661	cadpsa	116.799	-2.66024	0.817024	-3.25601	0.0011299	0.0151493	Ca2+-dependent activator protein for secretion a [Source:ZFIN;Acc:ZDB-GENE-030616-525]
ENSDARG00000100927	nfatc2a	49.9515	-2.65539	0.584872	-4.54012	5.62217e-06	0.000259984	nuclear factor of activated T cells 2a [Source:ZFIN;Acc:ZDB-GENE-120913-4]
ENSDARG00000029688	hsp70.1	105.6	-2.65508	0.707177	-3.75447	0.000173706	0.00370543	heat shock cognate 70-kd protein, tandem duplicate 1 [Source:ZFIN;Acc:ZDB-GENE-990415-91]
ENSDARG00000005335	slc22a4	445.781	-2.65152	0.843999	-3.14162	0.00168017	0.0204559	solute carrier family 22 member 4 [Source:ZFIN;Acc:ZDB-GENE-040426-1517]
ENSDARG00000061710	map3k8	108.997	-2.63623	0.566454	-4.65393	3.25671e-06	0.000165621	mitogen-activated protein kinase kinase kinase 8 [Source:ZFIN;Acc:ZDB-GENE-100316-8]
ENSDARG00000027940	kcnf1a	29.4396	-2.63616	0.519635	-5.0731	3.91382e-07	3.10563e-05	potassium voltage-gated channel, subfamily F, member 1a [Source:ZFIN;Acc:ZDB-GENE-041001-217]
ENSDARG00000006112	myof	542.761	-2.63332	0.805428	-3.26946	0.00107753	0.0146007	myoferlin [Source:ZFIN;Acc:ZDB-GENE-040426-1138]
ENSDARG00000043093	mpeg1.2	316.181	-2.62769	0.579433	-4.53494	5.76209e-06	0.000263567	macrophage expressed 1, tandem duplicate 2 [Source:ZFIN;Acc:ZDB-GENE-050522-305]
ENSDARG00000061520	b4galnt1a	139.63	-2.60059	0.460906	-5.64235	1.67743e-08	2.32707e-06	beta-1,4-N-acetyl-galactosaminyl transferase 1a [Source:ZFIN;Acc:ZDB-GENE-070112-1462]
ENSDARG00000034375	chst11	122.724	-2.60005	0.931598	-2.79095	0.00525531	0.0466775	carbohydrate (chondroitin 4) sulfotransferase 11 [Source:NCBI gene;Acc:404232]
ENSDARG00000032859	lratd2	77.9592	-2.59958	0.484034	-5.37066	7.84503e-08	8.55527e-06	LRAT domain containing 2 [Source:ZFIN;Acc:ZDB-GENE-060929-1130]
ENSDARG00000076872	mpp4l	13.6089	-2.59638	0.901856	-2.87893	0.00399025	0.0383842	membrane protein, palmitoylated 4-like [Source:ZFIN;Acc:ZDB-GENE-091118-7]
ENSDARG00000029832	slc26a1	385.288	-2.5927	0.869121	-2.98312	0.00285322	0.030148	solute carrier family 26 member 1 [Source:ZFIN;Acc:ZDB-GENE-070112-2182]
ENSDARG00000013719	gtse1	73.8053	-2.58839	0.672024	-3.85163	0.000117332	0.00275981	G-2 and S-phase expressed 1 [Source:ZFIN;Acc:ZDB-GENE-050522-493]
ENSDARG00000101482	hk2	440.779	-2.58149	0.425902	-6.06123	1.35087e-09	2.81105e-07	hexokinase 2 [Source:ZFIN;Acc:ZDB-GENE-040426-2017]
ENSDARG00000031246	hbegfb	155.102	-2.57993	0.515219	-5.00745	5.51567e-07	4.09022e-05	heparin-binding EGF-like growth factor b [Source:ZFIN;Acc:ZDB-GENE-070820-6]
ENSDARG00000075292	myo15aa	99.0518	-2.57406	0.803523	-3.20347	0.00135784	0.0173608	myosin XVAa [Source:ZFIN;Acc:ZDB-GENE-080425-2]
ENSDARG00000011809	mical1	207.28	-2.56399	0.430582	-5.95471	2.60538e-09	5.06014e-07	microtubule associated monooxygenase, calponin and LIM domain containing 1 [Source:NCBI gene;Acc:568573]
ENSDARG00000038012	fam83fa	98.6682	-2.55929	0.879993	-2.90831	0.00363387	0.0359213	family with sequence similarity 83 member Fa [Source:ZFIN;Acc:ZDB-GENE-090624-5]
ENSDARG00000098377	tnfrsf11b	265.855	-2.55319	0.67966	-3.75658	0.000172253	0.00369046	tumor necrosis factor receptor superfamily, member 11b [Source:ZFIN;Acc:ZDB-GENE-081104-76]
ENSDARG00000056719	slc6a19b	4009.12	-2.55242	0.622211	-4.10218	4.09276e-05	0.00121845	solute carrier family 6 member 19b [Source:ZFIN;Acc:ZDB-GENE-030131-4755]
ENSDARG00000029372	rasa4	253.691	-2.54881	0.285077	-8.94079	3.86409e-19	4.63532e-16	RAS p21 protein activator 4 [Source:ZFIN;Acc:ZDB-GENE-060526-349]
ENSDARG00000040177	rgs16	400.831	-2.53774	0.595811	-4.2593	2.05069e-05	0.000696995	regulator of G protein signaling 16 [Source:ZFIN;Acc:ZDB-GENE-050417-393]
ENSDARG00000002298	ankrd22	119.235	-2.52995	0.566189	-4.46838	7.88135e-06	0.000330709	ankyrin repeat domain 22 [Source:ZFIN;Acc:ZDB-GENE-040426-1120]
ENSDARG00000021924	hsp70.3	224.116	-2.52927	0.900261	-2.80949	0.00496199	0.0449474	heat shock cognate 70-kd protein, tandem duplicate 3 [Source:ZFIN;Acc:ZDB-GENE-110713-1]
ENSDARG00000057209	plppr5a	20.726	-2.50889	0.667662	-3.75772	0.000171467	0.00368465	phospholipid phosphatase related 5a [Source:ZFIN;Acc:ZDB-GENE-070705-281]
ENSDARG00000032010	slc15a2	1067.41	-2.49294	0.81742	-3.04977	0.00229017	0.025693	solute carrier family 15 member 2 [Source:NCBI gene;Acc:556684]
ENSDARG00000104290	ripk2	83.7598	-2.48719	0.433404	-5.73873	9.53864e-09	1.4849e-06	receptor-interacting serine-threonine kinase 2 [Source:ZFIN;Acc:ZDB-GENE-030902-3]
ENSDARG00000019063	fat1b	89.5682	-2.48418	0.702597	-3.53571	0.00040668	0.006981	FAT atypical cadherin 1b [Source:ZFIN;Acc:ZDB-GENE-130530-563]
ENSDARG00000088709	tnfaip8l3	297.661	-2.48261	0.54351	-4.56773	4.93041e-06	0.000234373	tumor necrosis factor, alpha-induced protein 8-like 3 [Source:NCBI gene;Acc:393322]
ENSDARG00000099849	ebf3a	59.8508	-2.47484	0.856683	-2.88886	0.00386639	0.0374519	EBF transcription factor 1a [Source:NCBI gene;Acc:565310]
ENSDARG00000011797	tent5bb	157.675	-2.4747	0.752937	-3.28672	0.0010136	0.0139383	terminal nucleotidyltransferase 5Bb [Source:ZFIN;Acc:ZDB-GENE-060503-431]
ENSDARG00000009079	BX296551.1	38.0582	-2.45503	0.557721	-4.40189	1.0731e-05	0.00041763	sodium-dependent lysophosphatidylcholine symporter 1-like [Source:NCBI gene;Acc:570014]
ENSDARG00000007171	aig1	67.8406	-2.45418	0.701987	-3.49605	0.000472202	0.00778465	androgen-induced 1 (H. sapiens) [Source:ZFIN;Acc:ZDB-GENE-041014-358]
ENSDARG00000035120	gldc	1638.62	-2.45099	0.544076	-4.50487	6.64138e-06	0.000290816	glycine dehydrogenase (decarboxylating) [Source:ZFIN;Acc:ZDB-GENE-030131-340]
ENSDARG00000013921	frya	1260.73	-2.44773	0.458858	-5.3344	9.58617e-08	1.00768e-05	furry homolog a (Drosophila) [Source:ZFIN;Acc:ZDB-GENE-060510-4]
ENSDARG00000001452	adam8a	265.84	-2.44561	0.511356	-4.78259	1.73049e-06	0.000102587	ADAM metallopeptidase domain 8a [Source:ZFIN;Acc:ZDB-GENE-030616-622]
ENSDARG00000073731	dok4	229.145	-2.44396	0.820976	-2.9769	0.00291182	0.0305929	docking protein 4 [Source:ZFIN;Acc:ZDB-GENE-041008-91]
ENSDARG00000090548	CR753886.1	566.547	-2.44194	0.450906	-5.41563	6.10722e-08	6.96416e-06	GTPase IMAP family member 4 [Source:NCBI gene;Acc:793765]
ENSDARG00000063314	apba2a	187.26	-2.43631	0.832586	-2.9262	0.00343134	0.0344804	amyloid beta (A4) precursor protein-binding, family A, member 2a [Source:ZFIN;Acc:ZDB-GENE-121107-1]
ENSDARG00000044982	dhrs3a	72.4236	-2.43568	0.713439	-3.414	0.000640159	0.00979353	dehydrogenase/reductase (SDR family) member 3a [Source:ZFIN;Acc:ZDB-GENE-040801-217]
ENSDARG00000055560	p2ry8	18.894	-2.43136	0.689475	-3.5264	0.000421254	0.0071529	P2Y receptor family member 8 [Source:ZFIN;Acc:ZDB-GENE-070912-447]
ENSDARG00000103852	pigrl4.2	20.4418	-2.43088	0.839275	-2.8964	0.0037747	0.0368666	polymeric immunoglobulin receptor-like 4.2 [Source:ZFIN;Acc:ZDB-GENE-150409-10]
ENSDARG00000017624	krt4	23375.7	-2.43038	0.632126	-3.84477	0.000120666	0.00282023	keratin 4 [Source:ZFIN;Acc:ZDB-GENE-000607-83]
ENSDARG00000018534	slc6a9	383.42	-2.42785	0.46951	-5.17103	2.3281e-07	2.08232e-05	solute carrier family 6 member 9 [Source:ZFIN;Acc:ZDB-GENE-050105-3]
ENSDARG00000016837	glipr2l	159.492	-2.4247	0.413061	-5.87009	4.35558e-09	7.46415e-07	GLI pathogenesis-related 2, like [Source:ZFIN;Acc:ZDB-GENE-041010-53]
ENSDARG00000030644	gnai3	60.5827	-2.41837	0.861955	-2.80568	0.005021	0.0451668	guanine nucleotide binding protein (G protein), alpha inhibiting activity polypeptide 3 [Source:ZFIN;Acc:ZDB-GENE-070713-6]
ENSDARG00000002494	itgb6	545.061	-2.40475	0.610431	-3.93943	8.16752e-05	0.0020959	integrin, beta 6 [Source:ZFIN;Acc:ZDB-GENE-100812-2]
ENSDARG00000104314	nrg1	200.231	-2.40191	0.530563	-4.5271	5.97984e-06	0.000268726	neuregulin 1 [Source:ZFIN;Acc:ZDB-GENE-050302-113]
ENSDARG00000055938	tspan14	648.349	-2.39237	0.441483	-5.41894	5.99539e-08	6.94682e-06	tetraspanin 14 [Source:ZFIN;Acc:ZDB-GENE-060825-329]
ENSDARG00000015890	mafa	888.065	-2.38302	0.729967	-3.26456	0.00109634	0.0147771	v-maf avian musculoaponeurotic fibrosarcoma oncogene homolog a (paralog a) [Source:ZFIN;Acc:ZDB-GENE-010605-2]
ENSDARG00000031929	stard14	456.041	-2.37888	0.570416	-4.17042	3.04034e-05	0.000961265	START domain containing 14 [Source:ZFIN;Acc:ZDB-GENE-040426-963]
ENSDARG00000011245	esrp1	608.386	-2.37578	0.608865	-3.90198	9.54075e-05	0.00236293	epithelial splicing regulatory protein 1 [Source:NCBI gene;Acc:560190]
ENSDARG00000087844	plekhn1	243.521	-2.37227	0.562113	-4.22027	2.44012e-05	0.000798736	pleckstrin homology domain containing, family N member 1 [Source:ZFIN;Acc:ZDB-GENE-090313-357]
ENSDARG00000075800	calml4a	587.649	-2.36324	0.6991	-3.3804	0.000723808	0.0107675	calmodulin-like 4a [Source:ZFIN;Acc:ZDB-GENE-081022-9]
ENSDARG00000015955	cldnc	2022.72	-2.35398	0.469217	-5.01683	5.25304e-07	3.90968e-05	claudin c [Source:ZFIN;Acc:ZDB-GENE-010328-3]
ENSDARG00000056453	afap1l1b	131.976	-2.35126	0.489695	-4.80147	1.57501e-06	9.53093e-05	actin filament associated protein 1-like 1b [Source:ZFIN;Acc:ZDB-GENE-061013-428]
ENSDARG00000013946	ivns1abpb	1649.94	-2.34624	0.651589	-3.6008	0.000317237	0.00582306	influenza virus NS1A binding protein b [Source:NCBI gene;Acc:334334]
ENSDARG00000019521	mpx	492.735	-2.3373	0.727614	-3.21227	0.00131689	0.0170078	myeloid-specific peroxidase [Source:ZFIN;Acc:ZDB-GENE-030131-9460]
ENSDARG00000071250	tmem79a	95.9408	-2.33693	0.794563	-2.94116	0.00326987	0.0333913	transmembrane protein 79a [Source:ZFIN;Acc:ZDB-GENE-060503-538]
ENSDARG00000057035	stoml3b	295.599	-2.33163	0.587462	-3.96899	7.21765e-05	0.00190907	stomatin (EPB72)-like 3b [Source:ZFIN;Acc:ZDB-GENE-050417-366]
ENSDARG00000075964	plekhg4	472.303	-2.32829	0.45316	-5.13791	2.77816e-07	2.38047e-05	pleckstrin homology domain containing, family G (with RhoGef domain) member 4 [Source:ZFIN;Acc:ZDB-GENE-030131-4824]
ENSDARG00000067848	nmrk2	925.652	-2.31715	0.800355	-2.89516	0.00378967	0.0369597	nicotinamide riboside kinase 2 [Source:ZFIN;Acc:ZDB-GENE-040912-44]
ENSDARG00000055835	slc26a6	803.607	-2.30928	0.770039	-2.99891	0.00270943	0.0291267	solute carrier family 26 member 6 [Source:ZFIN;Acc:ZDB-GENE-081105-83]
ENSDARG00000075034	raver2	1531.75	-2.30907	0.487603	-4.73554	2.18467e-06	0.000123072	ribonucleoprotein, PTB-binding 2 [Source:ZFIN;Acc:ZDB-GENE-090713-1]
ENSDARG00000040944	ntd5	347.014	-2.30871	0.48785	-4.73241	2.21866e-06	0.000123961	ntl-dependent gene 5 [Source:ZFIN;Acc:ZDB-GENE-031030-7]
ENSDARG00000068367	nfkbie	656.558	-2.30682	0.415657	-5.54982	2.85968e-08	3.64494e-06	nuclear factor of kappa light polypeptide gene enhancer in B-cells inhibitor, epsilon [Source:ZFIN;Acc:ZDB-GENE-061215-132]
ENSDARG00000038095	socs1a	311.602	-2.30634	0.514127	-4.48594	7.25941e-06	0.000310503	suppressor of cytokine signaling 1a [Source:ZFIN;Acc:ZDB-GENE-040801-205]
ENSDARG00000075436	sytl2b	261.078	-2.30553	0.739982	-3.11565	0.00183537	0.0218116	synaptotagmin-like 2b [Source:ZFIN;Acc:ZDB-GENE-121214-363]
ENSDARG00000101251	ldha	6011	-2.30147	0.443908	-5.18456	2.16521e-07	1.96245e-05	lactate dehydrogenase A4 [Source:NCBI gene;Acc:30496]
ENSDARG00000071012	ifit14	227.29	-2.29788	0.7177	-3.20172	0.00136608	0.0174552	interferon-induced protein with tetratricopeptide repeats 14 [Source:ZFIN;Acc:ZDB-GENE-131120-20]
ENSDARG00000074126	ttc39a	95.4868	-2.2914	0.759235	-3.01804	0.00254419	0.0277675	tetratricopeptide repeat domain 39A [Source:ZFIN;Acc:ZDB-GENE-091116-42]
ENSDARG00000057879	p3h3	228.9	-2.28573	0.571058	-4.00263	6.26421e-05	0.00170328	prolyl 3-hydroxylase 3 [Source:ZFIN;Acc:ZDB-GENE-060503-231]
ENSDARG00000001767	slc29a2	64.8785	-2.28326	0.622962	-3.66517	0.000247175	0.00483282	solute carrier family 29 member 2 [Source:ZFIN;Acc:ZDB-GENE-050220-15]
ENSDARG00000112870	CABZ01021599.1	41.0172	-2.28248	0.552083	-4.13431	3.56024e-05	0.00109179	receptor-interacting serine/threonine-protein kinase 2-like [Source:NCBI gene;Acc:110437957]
ENSDARG00000040608	gcnt7	347.25	-2.27183	0.480198	-4.73102	2.23394e-06	0.000124133	glucosaminyl (N-acetyl) transferase family member 7 [Source:ZFIN;Acc:ZDB-GENE-120919-3]
ENSDARG00000054423	slc7a6	185.963	-2.27074	0.56411	-4.02536	5.68886e-05	0.0015883	solute carrier family 7 member 6 [Source:NCBI gene;Acc:57957]
ENSDARG00000062009	gpr18	51.5592	-2.26871	0.749938	-3.0252	0.00248471	0.027301	G protein-coupled receptor 18 [Source:ZFIN;Acc:ZDB-GENE-070912-159]
ENSDARG00000052277	cabp2b	115.151	-2.26236	0.588783	-3.84244	0.000121816	0.00283763	calcium binding protein 2b [Source:ZFIN;Acc:ZDB-GENE-081028-55]
ENSDARG00000062280	hace1	416.68	-2.26037	0.461357	-4.89938	9.61384e-07	6.32436e-05	HECT domain and ankyrin repeat containing E3 ubiquitin protein ligase 1 [Source:NCBI gene;Acc:572430]
ENSDARG00000044752	p2rx4a	378.137	-2.25942	0.740572	-3.05091	0.00228152	0.0256348	purinergic receptor P2X, ligand-gated ion channel, 4a [Source:ZFIN;Acc:ZDB-GENE-020806-2]
ENSDARG00000079895	ehbp1l1b	672.255	-2.24858	0.395368	-5.6873	1.29065e-08	1.87145e-06	EH domain binding protein 1-like 1b [Source:ZFIN;Acc:ZDB-GENE-091204-238]
ENSDARG00000103519	adamts1	170.835	-2.24841	0.593535	-3.78816	0.000151766	0.0033641	ADAM metallopeptidase with thrombospondin type 1 motif, 1 [Source:ZFIN;Acc:ZDB-GENE-070814-1]
ENSDARG00000008075	illr4	172.595	-2.2417	0.503224	-4.45467	8.40208e-06	0.000347553	immune-related, lectin-like receptor 4 [Source:ZFIN;Acc:ZDB-GENE-050311-5]
ENSDARG00000001933	prkag2b	134.043	-2.24094	0.386791	-5.79367	6.88666e-09	1.12352e-06	protein kinase, AMP-activated, gamma 2 non-catalytic subunit b [Source:ZFIN;Acc:ZDB-GENE-070912-442]
ENSDARG00000001782	prkacba	102.936	-2.23	0.521153	-4.27898	1.8775e-05	0.00065166	protein kinase, cAMP-dependent, catalytic, beta a [Source:ZFIN;Acc:ZDB-GENE-040426-1351]
ENSDARG00000076924	als2b	798.659	-2.22914	0.633345	-3.51963	0.000432153	0.00726257	alsin Rho guanine nucleotide exchange factor ALS2 b [Source:ZFIN;Acc:ZDB-GENE-080929-1]
ENSDARG00000015355	fosl1a	269.961	-2.22738	0.750931	-2.96616	0.00301545	0.031423	FOS-like antigen 1a [Source:ZFIN;Acc:ZDB-GENE-061207-7]
ENSDARG00000060626	dgkaa	700.809	-2.22431	0.51033	-4.35857	1.30915e-05	0.00048827	diacylglycerol kinase, alpha a [Source:ZFIN;Acc:ZDB-GENE-060616-305]
ENSDARG00000051768	fhod1	223.105	-2.22027	0.46571	-4.76749	1.86532e-06	0.000109422	formin homology 2 domain containing 1 [Source:ZFIN;Acc:ZDB-GENE-110623-4]
ENSDARG00000069503	cldnh	432.4	-2.21601	0.579332	-3.82511	0.000130715	0.00299515	claudin h [Source:ZFIN;Acc:ZDB-GENE-010328-8]
ENSDARG00000040568	pdzd3a	357.269	-2.21031	0.53286	-4.14802	3.35364e-05	0.00103937	PDZ domain containing 3a [Source:ZFIN;Acc:ZDB-GENE-080430-1]
ENSDARG00000076586	csf2rb	117.368	-2.20174	0.408281	-5.39271	6.94038e-08	7.78841e-06	colony stimulating factor 2 receptor, beta, low-affinity (granulocyte-macrophage) [Source:ZFIN;Acc:ZDB-GENE-080115-1]
ENSDARG00000017860	rgs5b	113.66	-2.19732	0.55383	-3.96749	7.26321e-05	0.00191615	regulator of G protein signaling 5b [Source:ZFIN;Acc:ZDB-GENE-050417-359]
ENSDARG00000074501	tnip2	154.868	-2.19354	0.498646	-4.39899	1.08757e-05	0.00042085	TNFAIP3 interacting protein 2 [Source:ZFIN;Acc:ZDB-GENE-120913-2]
ENSDARG00000059259	pabpc4	1118.09	-2.19347	0.603734	-3.63318	0.000279953	0.00528619	poly(A) binding protein, cytoplasmic 4 (inducible form) [Source:ZFIN;Acc:ZDB-GENE-030131-9663]
ENSDARG00000026137	sfxn5b	205.778	-2.18806	0.624203	-3.50536	0.000455986	0.00756625	sideroflexin 5b [Source:ZFIN;Acc:ZDB-GENE-050706-107]
ENSDARG00000012513	sdcbp2	3868.11	-2.18288	0.302171	-7.22397	5.04905e-13	2.28812e-10	syndecan binding protein (syntenin) 2 [Source:ZFIN;Acc:ZDB-GENE-030131-3727]
ENSDARG00000074575	ppp1r9alb	1126.96	-2.18168	0.525577	-4.15102	3.30995e-05	0.00102896	protein phosphatase 1 regulatory subunit 9A-like B [Source:ZFIN;Acc:ZDB-GENE-090312-99]
ENSDARG00000076075	myh7ba	97.8076	-2.17816	0.667525	-3.26304	0.00110225	0.0148371	myosin, heavy chain 7B, cardiac muscle, beta a [Source:ZFIN;Acc:ZDB-GENE-100914-2]
ENSDARG00000054842	hsd17b14	1054.61	-2.17302	0.479964	-4.52746	5.96961e-06	0.000268726	hydroxysteroid (17-beta) dehydrogenase 14 [Source:ZFIN;Acc:ZDB-GENE-040801-24]
ENSDARG00000033443	mdm2	657.374	-2.173	0.442888	-4.90642	9.27548e-07	6.16139e-05	MDM2 proto-oncogene [Source:NCBI gene;Acc:30637]
ENSDARG00000009242	fev	166.388	-2.16539	0.667744	-3.24284	0.00118345	0.0156485	FEV transcription factor, ETS family member [Source:NCBI gene;Acc:791175]
ENSDARG00000075397	cipca	75.2764	-2.16361	0.592677	-3.65057	0.000261659	0.00505783	CLOCK-interacting pacemaker a [Source:ZFIN;Acc:ZDB-GENE-120928-5]
ENSDARG00000053311	tespa1	133.462	-2.16341	0.570797	-3.79016	0.000150552	0.00334809	thymocyte expressed, positive selection associated 1 [Source:ZFIN;Acc:ZDB-GENE-120727-10]
ENSDARG00000090783	mfap4	212.168	-2.15941	0.64611	-3.34216	0.000831282	0.0119805	microfibril associated protein 4 [Source:ZFIN;Acc:ZDB-GENE-040426-2246]
ENSDARG00000055252	snap23.2	781.719	-2.15483	0.537074	-4.01217	6.01621e-05	0.00166923	synaptosome associated protein 23.2 [Source:ZFIN;Acc:ZDB-GENE-051030-75]
ENSDARG00000116378	ms4a17a.17	2172.44	-2.14014	0.606547	-3.5284	0.000418084	0.00711686	membrane-spanning 4-domains, subfamily A, member 17A.17 [Source:ZFIN;Acc:ZDB-GENE-070424-27]
ENSDARG00000058731	slc2a6	175.52	-2.13976	0.552872	-3.87027	0.000108717	0.00260627	solute carrier family 2 member 6 [Source:ZFIN;Acc:ZDB-GENE-081104-301]
ENSDARG00000068128	ppp1r15b	190.72	-2.12157	0.73901	-2.87082	0.00409404	0.0390139	protein phosphatase 1, regulatory subunit 15B [Source:ZFIN;Acc:ZDB-GENE-030829-40]
ENSDARG00000101043	ppl	2040.63	-2.11742	0.560567	-3.77729	0.000158542	0.00346114	periplakin [Source:ZFIN;Acc:ZDB-GENE-041008-196]
ENSDARG00000087574	nox1	133.111	-2.11484	0.603971	-3.50155	0.000462558	0.00765661	NADPH oxidase 1 [Source:ZFIN;Acc:ZDB-GENE-070404-1]
ENSDARG00000087870	adgrf3a	127.274	-2.11384	0.748299	-2.82486	0.00473012	0.0434901	adhesion G protein-coupled receptor F3a [Source:ZFIN;Acc:ZDB-GENE-131121-607]
ENSDARG00000058734	prdx1	741.034	-2.11315	0.459087	-4.60294	4.16569e-06	0.000202747	peroxiredoxin 1 [Source:ZFIN;Acc:ZDB-GENE-050320-35]
ENSDARG00000038687	nfkb2	1001.91	-2.11225	0.324805	-6.50313	7.86648e-11	2.46802e-08	nuclear factor of kappa light polypeptide gene enhancer in B-cells 2 (p49/p100) [Source:ZFIN;Acc:ZDB-GENE-030131-6701]
ENSDARG00000059729	sec14l8	1235.73	-2.11219	0.681444	-3.09958	0.00193794	0.0227436	SEC14-like lipid binding 8 [Source:ZFIN;Acc:ZDB-GENE-060526-180]
ENSDARG00000004297	irf2bpl	622.595	-2.10594	0.382136	-5.51096	3.56891e-08	4.38439e-06	interferon regulatory factor 2 binding protein-like [Source:ZFIN;Acc:ZDB-GENE-040426-1968]
ENSDARG00000002576	cabp5a	39.8202	-2.1055	0.718365	-2.93096	0.00337917	0.0341186	calcium binding protein 5a [Source:ZFIN;Acc:ZDB-GENE-040426-1655]
ENSDARG00000102762	pik3r5	172.513	-2.10271	0.466489	-4.50753	6.55866e-06	0.000288878	phosphoinositide-3-kinase, regulatory subunit 5 [Source:ZFIN;Acc:ZDB-GENE-030131-2308]
ENSDARG00000077385	rgs19	30.5554	-2.09996	0.636205	-3.30076	0.000964241	0.0134502	regulator of G protein signaling 19 [Source:ZFIN;Acc:ZDB-GENE-080723-72]
ENSDARG00000007753	cpne2	525.675	-2.09646	0.645026	-3.25019	0.00115327	0.0153716	copine II [Source:ZFIN;Acc:ZDB-GENE-030131-7896]
ENSDARG00000025522	sgk1	5344.3	-2.09557	0.562213	-3.72735	0.000193504	0.00404389	serum/glucocorticoid regulated kinase 1 [Source:NCBI gene;Acc:324140]
ENSDARG00000017354	epha2a	285.472	-2.09404	0.441975	-4.73793	2.15917e-06	0.000121972	eph receptor A2 a [Source:ZFIN;Acc:ZDB-GENE-990415-63]
ENSDARG00000022456	eno1a	5606.63	-2.08654	0.565341	-3.69075	0.00022359	0.00449672	enolase 1a, (alpha) [Source:ZFIN;Acc:ZDB-GENE-030131-6048]
ENSDARG00000052997	sema4e	290.287	-2.08123	0.567254	-3.66896	0.000243539	0.00478929	semaphorin 4e [Source:NCBI gene;Acc:796377]
ENSDARG00000100461	CABZ01078737.1	86.2701	-2.08071	0.480394	-4.33125	1.48264e-05	0.000535142	interleukin-1 receptor type 2 [Source:NCBI gene;Acc:101882195]
ENSDARG00000002391	tlcd1	107.063	-2.0689	0.604689	-3.42143	0.000622918	0.00958729	TLC domain containing 1 [Source:ZFIN;Acc:ZDB-GENE-041010-173]
ENSDARG00000103542	vegfaa	199.337	-2.06408	0.542716	-3.80325	0.00014281	0.00320389	vascular endothelial growth factor Aa [Source:NCBI gene;Acc:30682]
ENSDARG00000038489	b3gnt7	153.812	-2.05377	0.443801	-4.62767	3.69797e-06	0.000183933	UDP-GlcNAc:betaGal beta-1,3-N-acetylglucosaminyltransferase 7 [Source:ZFIN;Acc:ZDB-GENE-021210-4]
ENSDARG00000077399	ubash3bb	104.332	-2.04876	0.562228	-3.644	0.000268431	0.00515453	ubiquitin associated and SH3 domain containing Bb [Source:ZFIN;Acc:ZDB-GENE-080724-6]
ENSDARG00000074776	tmem154	74.9606	-2.04349	0.581924	-3.51162	0.000445388	0.00743882	transmembrane protein 154 [Source:ZFIN;Acc:ZDB-GENE-030131-2401]
ENSDARG00000101190	cyp2k8	90.9182	-2.03951	0.700531	-2.91138	0.00359834	0.0357149	cytochrome P450, family 2, subfamily K, polypeptide 8 [Source:ZFIN;Acc:ZDB-GENE-080721-19]
ENSDARG00000033845	igsf9ba	1198.27	-2.03407	0.506938	-4.01247	6.00856e-05	0.00166923	immunoglobulin superfamily, member 9Ba [Source:ZFIN;Acc:ZDB-GENE-060503-729]
ENSDARG00000063509	lrrc58b	159.342	-2.03292	0.316139	-6.43045	1.27231e-10	3.65439e-08	leucine rich repeat containing 58b [Source:ZFIN;Acc:ZDB-GENE-050309-29]
ENSDARG00000020761	arrdc2	2422.66	-2.02217	0.642553	-3.14709	0.00164905	0.0202241	arrestin domain containing 2 [Source:ZFIN;Acc:ZDB-GENE-030131-7146]
ENSDARG00000015506	pibf1	353.549	-2.02199	0.658549	-3.07038	0.0021379	0.0243838	progesterone immunomodulatory binding factor 1 [Source:ZFIN;Acc:ZDB-GENE-040801-94]
ENSDARG00000015033	slc23a1	518.784	-2.01958	0.551322	-3.66315	0.000249128	0.00485704	solute carrier family 23 member 1 [Source:ZFIN;Acc:ZDB-GENE-080804-2]
ENSDARG00000037307	gnpda1	855.386	-2.01867	0.539859	-3.73926	0.000184565	0.00390439	glucosamine-6-phosphate deaminase 1 [Source:ZFIN;Acc:ZDB-GENE-050417-417]
ENSDARG00000097513	CT573383.1	215.895	-2.01809	0.716107	-2.81813	0.00483038	0.0441654	annexin A2-A-like [Source:NCBI gene;Acc:100006250]
ENSDARG00000057113	c6	1797.96	-2.01523	0.529678	-3.80462	0.000142021	0.0031932	complement component 6 [Source:ZFIN;Acc:ZDB-GENE-040426-1358]
ENSDARG00000056885	per1a	451.761	-2.01494	0.306382	-6.57656	4.81472e-11	1.58365e-08	period circadian clock 1a [Source:ZFIN;Acc:ZDB-GENE-011220-1]
ENSDARG00000015731	ano5a	434.243	-2.00835	0.650047	-3.08954	0.00200465	0.0232806	anoctamin 5a [Source:ZFIN;Acc:ZDB-GENE-091013-2]
ENSDARG00000043317	kita	115.876	-2.00409	0.485721	-4.12602	3.69094e-05	0.0011251	KIT proto-oncogene, receptor tyrosine kinase a [Source:NCBI gene;Acc:30256]
ENSDARG00000060374	ttll11	198.737	-2.00319	0.499363	-4.0115	6.03347e-05	0.00167113	tubulin tyrosine ligase-like family, member 11 [Source:ZFIN;Acc:ZDB-GENE-061013-747]
ENSDARG00000052405	pak6b	142.137	-1.99439	0.666098	-2.99414	0.0027522	0.0294513	p21 protein (Cdc42/Rac)-activated kinase 6b [Source:ZFIN;Acc:ZDB-GENE-041014-121]
ENSDARG00000102758	FO704661.1	176.879	-1.99297	0.564453	-3.5308	0.000414305	0.00709398	gamma-glutamyl hydrolase [Source:NCBI gene;Acc:553228]
ENSDARG00000070669	cxcr3.3	285.832	-1.99204	0.513867	-3.87656	0.000105942	0.00255375	chemokine (C-X-C motif) receptor 3, tandem duplicate 3 [Source:ZFIN;Acc:ZDB-GENE-100922-34]
ENSDARG00000004405	snx10a	55.5307	-1.99011	0.587463	-3.38763	0.000704981	0.0105711	sorting nexin 10a [Source:NCBI gene;Acc:403027]
ENSDARG00000054304	homeza	851.348	-1.98318	0.610281	-3.24962	0.00115561	0.0153927	homeobox and leucine zipper encoding a [Source:ZFIN;Acc:ZDB-GENE-030616-592]
ENSDARG00000105287	mpp1	3200.84	-1.98165	0.389339	-5.08977	3.58489e-07	2.91262e-05	membrane protein, palmitoylated 1 [Source:ZFIN;Acc:ZDB-GENE-031113-4]
ENSDARG00000003113	ada	3515.38	-1.98026	0.457503	-4.32841	1.50187e-05	0.000538272	adenosine deaminase [Source:NCBI gene;Acc:436919]
ENSDARG00000076144	icam3	484.58	-1.97909	0.305681	-6.47437	9.52059e-11	2.8552e-08	intercellular adhesion molecule 3 [Source:ZFIN;Acc:ZDB-GENE-060503-219]
ENSDARG00000068851	rnf183	124.642	-1.97818	0.599422	-3.30015	0.00096633	0.0134606	ring finger protein 183 [Source:ZFIN;Acc:ZDB-GENE-060929-1090]
ENSDARG00000078970	il7r	377.255	-1.97169	0.408244	-4.82969	1.36743e-06	8.554e-05	interleukin 7 receptor [Source:ZFIN;Acc:ZDB-GENE-080110-7]
ENSDARG00000098805	vwa11	167.43	-1.9703	0.668879	-2.94568	0.00322248	0.0330398	von Willebrand factor A domain containing 11 [Source:ZFIN;Acc:ZDB-GENE-141211-58]
ENSDARG00000016086	smurf1	699.295	-1.96959	0.365705	-5.38574	7.2149e-08	8.04008e-06	SMAD specific E3 ubiquitin protein ligase 1 [Source:ZFIN;Acc:ZDB-GENE-040426-2744]
ENSDARG00000045695	myca	199.03	-1.96668	0.427654	-4.59876	4.25009e-06	0.000205872	MYC proto-oncogene, bHLH transcription factor a [Source:NCBI gene;Acc:30686]
ENSDARG00000014907	htra1b	708.098	-1.96584	0.490943	-4.00421	6.22246e-05	0.00169645	HtrA serine peptidase 1b [Source:NCBI gene;Acc:565082]
ENSDARG00000103311	fbln1	186.458	-1.96294	0.549786	-3.57037	0.000356473	0.00633236	fibulin 1 [Source:NCBI gene;Acc:30240]
ENSDARG00000070480	agr2	1474.74	-1.96013	0.639095	-3.06704	0.00216191	0.0246164	anterior gradient 2 [Source:NCBI gene;Acc:335616]
ENSDARG00000057652	dbpb	459.308	-1.95601	0.407118	-4.80453	1.55114e-06	9.47076e-05	D site albumin promoter binding protein b [Source:ZFIN;Acc:ZDB-GENE-100922-6]
ENSDARG00000077836	ttc22	72.8473	-1.9548	0.700703	-2.78978	0.00527446	0.0467865	tetratricopeptide repeat domain 22 [Source:ZFIN;Acc:ZDB-GENE-050208-292]
ENSDARG00000076250	rasef	58.1494	-1.9501	0.675065	-2.88876	0.00386769	0.0374519	RAS and EF-hand domain containing [Source:ZFIN;Acc:ZDB-GENE-081105-157]
ENSDARG00000076972	plvapa	353.507	-1.94968	0.449701	-4.33551	1.45425e-05	0.000526758	plasmalemma vesicle associated protein a [Source:ZFIN;Acc:ZDB-GENE-070912-432]
ENSDARG00000063255	btbd11a	464.005	-1.94894	0.386702	-5.03989	4.65793e-07	3.55765e-05	BTB (POZ) domain containing 11a [Source:NCBI gene;Acc:562893]
ENSDARG00000104295	arhgap21a	525.256	-1.94173	0.613485	-3.16507	0.00155044	0.0192942	Rho GTPase activating protein 21a [Source:ZFIN;Acc:ZDB-GENE-090918-5]
ENSDARG00000103457	spartb	706.803	-1.93867	0.406602	-4.76798	1.86086e-06	0.000109422	spartin b [Source:ZFIN;Acc:ZDB-GENE-060825-146]
ENSDARG00000009031	tnikb	654.854	-1.92948	0.447211	-4.31447	1.59988e-05	0.000569395	TRAF2 and NCK interacting kinase b [Source:ZFIN;Acc:ZDB-GENE-051113-320]
ENSDARG00000114063	parm1	684.023	-1.92514	0.640157	-3.0073	0.0026358	0.0285762	prostate androgen-regulated mucin-like protein 1 [Source:ZFIN;Acc:ZDB-GENE-140106-262]
ENSDARG00000031956	tmem63a	286.911	-1.9239	0.311005	-6.18609	6.16754e-10	1.4797e-07	transmembrane protein 63A [Source:ZFIN;Acc:ZDB-GENE-041210-107]
ENSDARG00000104399	tppp	421.919	-1.92356	0.60655	-3.17131	0.00151754	0.0190093	tubulin polymerization promoting protein [Source:ZFIN;Acc:ZDB-GENE-101115-2]
ENSDARG00000077082	agtrap	114.096	-1.91728	0.509541	-3.76276	0.000168051	0.00362653	angiotensin II receptor-associated protein [Source:ZFIN;Acc:ZDB-GENE-050309-11]
ENSDARG00000096433	rock2b	116.996	-1.91583	0.526538	-3.63855	0.000274182	0.00521584	rho-associated, coiled-coil containing protein kinase 2b [Source:ZFIN;Acc:ZDB-GENE-060125-2]
ENSDARG00000053535	lmo7b	87.0751	-1.91546	0.554368	-3.45521	0.000549861	0.00874673	LIM domain 7b [Source:ZFIN;Acc:ZDB-GENE-060825-242]
ENSDARG00000052950	arhgap23a	1014.68	-1.91318	0.304727	-6.27834	3.42208e-10	8.51055e-08	Rho GTPase activating protein 23a [Source:ZFIN;Acc:ZDB-GENE-121019-1]
ENSDARG00000071238	ftr58	90.7967	-1.89345	0.674566	-2.80691	0.00500194	0.0451347	finTRIM family, member 58 [Source:ZFIN;Acc:ZDB-GENE-080219-44]
ENSDARG00000077855	znrf2a	194.333	-1.89182	0.556262	-3.40096	0.000671509	0.0101513	zinc and ring finger 2a [Source:ZFIN;Acc:ZDB-GENE-070820-15]
ENSDARG00000056615	cybb	535.5	-1.87249	0.331318	-5.65164	1.58923e-08	2.23512e-06	cytochrome b-245, beta polypeptide (chronic granulomatous disease) [Source:ZFIN;Acc:ZDB-GENE-040426-1380]
ENSDARG00000059610	gpr146	683.081	-1.86802	0.373944	-4.99547	5.86919e-07	4.28998e-05	G protein-coupled receptor 146 [Source:ZFIN;Acc:ZDB-GENE-050823-3]
ENSDARG00000023214	mob2a	368.118	-1.86605	0.373429	-4.99708	5.82063e-07	4.26979e-05	MOB kinase activator 2a [Source:ZFIN;Acc:ZDB-GENE-040718-56]
ENSDARG00000074447	dapk3	616.575	-1.86411	0.340614	-5.47279	4.43014e-08	5.37761e-06	death-associated protein kinase 3 [Source:ZFIN;Acc:ZDB-GENE-030131-3026]
ENSDARG00000055398	foxc1b	162.589	-1.86185	0.60056	-3.10019	0.00193394	0.0227182	forkhead box C1b [Source:NCBI gene;Acc:79375]
ENSDARG00000087832	bcl3	551.239	-1.86019	0.63914	-2.91046	0.00360893	0.0357787	BCL3 transcription coactivator [Source:ZFIN;Acc:ZDB-GENE-061013-1]
ENSDARG00000043624	slc66a1	253.781	-1.85905	0.527022	-3.52747	0.000419558	0.00713004	solute carrier family 66 member 1 [Source:ZFIN;Acc:ZDB-GENE-050306-4]
ENSDARG00000116259	chia.6	836.565	-1.85769	0.510748	-3.6372	0.000275617	0.00523339	chitinase, acidic.6 [Source:ZFIN;Acc:ZDB-GENE-030131-1140]
ENSDARG00000062000	abtb2b	121.497	-1.85741	0.591208	-3.14172	0.00167958	0.0204559	ankyrin repeat and BTB (POZ) domain containing 2b [Source:ZFIN;Acc:ZDB-GENE-100422-14]
ENSDARG00000036912	edn1	27.4746	-1.85729	0.62323	-2.98011	0.00288145	0.030352	endothelin 1 [Source:ZFIN;Acc:ZDB-GENE-000920-1]
ENSDARG00000044142	acss1	1975.56	-1.84038	0.469336	-3.92123	8.8097e-05	0.00222072	acyl-CoA synthetase short chain family member 1 [Source:ZFIN;Acc:ZDB-GENE-050320-139]
ENSDARG00000078217	cblc	84.9122	-1.83552	0.568388	-3.22935	0.00124073	0.0162298	Cbl proto-oncogene C, E3 ubiquitin protein ligase [Source:ZFIN;Acc:ZDB-GENE-080220-20]
ENSDARG00000020072	thbs4b	297.22	-1.83509	0.645502	-2.84288	0.0044708	0.0416505	thrombospondin 4b [Source:NCBI gene;Acc:252850]
ENSDARG00000076218	b3galt4	43.4083	-1.83233	0.583441	-3.14056	0.00168628	0.0204935	UDP-Gal:betaGlcNAc beta 1,3-galactosyltransferase, polypeptide 4 [Source:ZFIN;Acc:ZDB-GENE-081104-482]
ENSDARG00000062430	gpd2	336.576	-1.81934	0.323979	-5.61559	1.95891e-08	2.68108e-06	glycerol-3-phosphate dehydrogenase 2 (mitochondrial) [Source:ZFIN;Acc:ZDB-GENE-030131-4869]
ENSDARG00000077396	tlcd2	513.173	-1.81218	0.389308	-4.65489	3.24159e-06	0.000165461	TLC domain containing 2 [Source:NCBI gene;Acc:559420]
ENSDARG00000102612	slc15a4	126.596	-1.81136	0.428503	-4.22718	2.3664e-05	0.0007771	solute carrier family 15 member 4 [Source:ZFIN;Acc:ZDB-GENE-040426-1047]
ENSDARG00000040777	inhbb	108.092	-1.80823	0.440009	-4.10952	3.96484e-05	0.00119069	inhibin subunit beta B [Source:ZFIN;Acc:ZDB-GENE-990415-2]
ENSDARG00000021255	arhgap22	39.8831	-1.80792	0.622495	-2.90432	0.00368052	0.036172	Rho GTPase activating protein 22 [Source:ZFIN;Acc:ZDB-GENE-090313-87]
ENSDARG00000062058	slc12a7b	1361.96	-1.80473	0.356527	-5.06198	4.14931e-07	3.22965e-05	solute carrier family 12 member 7b [Source:ZFIN;Acc:ZDB-GENE-030829-61]
ENSDARG00000100494	pbx1a	216.155	-1.80137	0.520824	-3.4587	0.000542789	0.00866127	pre-B-cell leukemia homeobox 1a [Source:ZFIN;Acc:ZDB-GENE-000405-1]
ENSDARG00000005112	cdh17	6836.35	-1.80021	0.601742	-2.99166	0.00277464	0.0296092	cadherin 17, LI cadherin (liver-intestine) [Source:ZFIN;Acc:ZDB-GENE-030910-3]
ENSDARG00000018971	b3gnt5a	298.916	-1.79987	0.584961	-3.07691	0.0020916	0.02398	UDP-GlcNAc:betaGal beta-1,3-N-acetylglucosaminyltransferase 5a [Source:NCBI gene;Acc:336526]
ENSDARG00000035571	abhd17b	377.177	-1.79853	0.377265	-4.76728	1.86726e-06	0.000109422	abhydrolase domain containing 17B [Source:ZFIN;Acc:ZDB-GENE-040718-244]
ENSDARG00000020136	ptges	94.151	-1.79198	0.502269	-3.56777	0.000360035	0.00637905	prostaglandin E synthase [Source:ZFIN;Acc:ZDB-GENE-050407-2]
ENSDARG00000027199	smad1	481.523	-1.79077	0.302086	-5.92803	3.06586e-09	5.78907e-07	SMAD family member 1 [Source:NCBI gene;Acc:30628]
ENSDARG00000057949	slc43a3b	462.772	-1.78672	0.386793	-4.61931	3.85016e-06	0.000189653	solute carrier family 43 member 3b [Source:ZFIN;Acc:ZDB-GENE-060312-28]
ENSDARG00000068973	pdlim4	136.602	-1.78364	0.522967	-3.41062	0.000648149	0.00989348	PDZ and LIM domain 4 [Source:ZFIN;Acc:ZDB-GENE-070308-5]
ENSDARG00000057352	slc25a29	86.6216	-1.77915	0.527064	-3.3756	0.000736562	0.0109321	solute carrier family 25 member 29 [Source:ZFIN;Acc:ZDB-GENE-050913-70]
ENSDARG00000035459	spns3	215.992	-1.7775	0.459053	-3.8721	0.000107903	0.00259183	spinster homolog 3 (Drosophila) [Source:NCBI gene;Acc:568387]
ENSDARG00000052155	lrrc8ab	186.486	-1.76751	0.559952	-3.15654	0.00159656	0.0197655	leucine rich repeat containing 8 VRAC subunit Ab [Source:ZFIN;Acc:ZDB-GENE-060531-43]
ENSDARG00000059693	adam19a	108.691	-1.76164	0.563343	-3.12712	0.00176528	0.0211513	ADAM metallopeptidase domain 19a [Source:ZFIN;Acc:ZDB-GENE-070813-1]
ENSDARG00000002210	stk25a	268.143	-1.75852	0.546496	-3.2178	0.00129176	0.0167575	serine/threonine kinase 25a [Source:ZFIN;Acc:ZDB-GENE-041010-92]
ENSDARG00000006636	slitrk2	166.545	-1.75831	0.56519	-3.11101	0.00186446	0.02208	SLIT and NTRK-like family, member 2 [Source:ZFIN;Acc:ZDB-GENE-080327-7]
ENSDARG00000027172	phactr2	412.252	-1.75506	0.597151	-2.93906	0.00329207	0.0335509	phosphatase and actin regulator 2 [Source:ZFIN;Acc:ZDB-GENE-040724-11]
ENSDARG00000077768	malt1	118.335	-1.75272	0.397904	-4.40488	1.0584e-05	0.000414281	MALT paracaspase 1 [Source:ZFIN;Acc:ZDB-GENE-070705-156]
ENSDARG00000099730	pkma	4923.76	-1.74649	0.339321	-5.14701	2.64665e-07	2.287e-05	pyruvate kinase M1/2a [Source:ZFIN;Acc:ZDB-GENE-031201-4]
ENSDARG00000019498	cry5	167.725	-1.74155	0.309387	-5.62903	1.81225e-08	2.49711e-06	cryptochrome circadian regulator 5 [Source:ZFIN;Acc:ZDB-GENE-010426-8]
ENSDARG00000012586	fmnl2a	132.689	-1.74098	0.470086	-3.70353	0.000212616	0.00433905	formin-like 2a [Source:ZFIN;Acc:ZDB-GENE-081105-70]
ENSDARG00000043257	ckbb	9419.23	-1.73864	0.286235	-6.07416	1.24642e-09	2.6756e-07	creatine kinase, brain b [Source:ZFIN;Acc:ZDB-GENE-020103-2]
ENSDARG00000033466	tagln2	2705.71	-1.73128	0.38969	-4.44271	8.88318e-06	0.000356604	transgelin 2 [Source:ZFIN;Acc:ZDB-GENE-020802-2]
ENSDARG00000025428	socs3a	2317.71	-1.72118	0.50101	-3.43542	0.000591639	0.00922244	suppressor of cytokine signaling 3a [Source:ZFIN;Acc:ZDB-GENE-030131-7349]
ENSDARG00000059743	tmem98	204.582	-1.71883	0.443354	-3.87688	0.000105806	0.00255348	transmembrane protein 98 [Source:ZFIN;Acc:ZDB-GENE-070112-1092]
ENSDARG00000070486	rbp7b	155.896	-1.71805	0.556226	-3.08876	0.00200991	0.0233123	retinol binding protein 7b, cellular [Source:ZFIN;Acc:ZDB-GENE-081022-134]
ENSDARG00000086825	znf521	27.7705	-1.7176	0.457536	-3.75402	0.000174023	0.00370831	zinc finger protein 521 [Source:ZFIN;Acc:ZDB-GENE-141210-10]
ENSDARG00000039093	got1	4182.44	-1.71753	0.292267	-5.87657	4.18863e-09	7.3059e-07	glutamic-oxaloacetic transaminase 1, soluble [Source:ZFIN;Acc:ZDB-GENE-040426-2003]
ENSDARG00000104312	CT573342.2	163.963	-1.71597	0.518444	-3.30985	0.000933455	0.0131464	POU class 2 associating factor 1 [Source:NCBI gene;Acc:103908823]
ENSDARG00000014340	rab11al	170.844	-1.7155	0.443605	-3.86718	0.000110101	0.002623	RAB11a, member RAS oncogene family, like [Source:ZFIN;Acc:ZDB-GENE-031118-188]
ENSDARG00000053858	crip1	2461.83	-1.71512	0.421799	-4.06621	4.77841e-05	0.00138222	cysteine-rich protein 1 [Source:ZFIN;Acc:ZDB-GENE-041111-1]
ENSDARG00000042332	plin2	1344.57	-1.71345	0.403542	-4.24602	2.17597e-05	0.000731045	perilipin 2 [Source:ZFIN;Acc:ZDB-GENE-050913-12]
ENSDARG00000027807	frk	832.48	-1.71004	0.455996	-3.75012	0.000176751	0.0037562	fyn-related Src family tyrosine kinase [Source:ZFIN;Acc:ZDB-GENE-110411-7]
ENSDARG00000025615	prr15la	857.308	-1.70892	0.470463	-3.63242	0.000280775	0.00529681	proline rich 15 like a [Source:NCBI gene;Acc:445084]
ENSDARG00000074258	gramd1bb	158.355	-1.70577	0.510881	-3.33888	0.000841163	0.0120728	GRAM domain containing 1Bb [Source:ZFIN;Acc:ZDB-GENE-140106-106]
ENSDARG00000079286	bcr	492.09	-1.70353	0.539131	-3.15977	0.00157896	0.0195743	BCR activator of RhoGEF and GTPase [Source:ZFIN;Acc:ZDB-GENE-040724-43]
ENSDARG00000039343	ahcyl2b	1951.58	-1.70302	0.37554	-4.53486	5.76428e-06	0.000263567	adenosylhomocysteinase like 2b [Source:ZFIN;Acc:ZDB-GENE-040115-5]
ENSDARG00000003142	dachc	221.819	-1.6988	0.597216	-2.84452	0.00444779	0.0414741	dachshund c [Source:ZFIN;Acc:ZDB-GENE-020402-5]
ENSDARG00000099844	GNAZ	179.091	-1.6955	0.588066	-2.88317	0.0039369	0.037999	guanine nucleotide binding protein (G protein), alpha z polypeptide [Source:NCBI gene;Acc:564915]
ENSDARG00000034718	tfpia	1380.14	-1.69241	0.411783	-4.10996	3.95728e-05	0.00119028	tissue factor pathway inhibitor a [Source:ZFIN;Acc:ZDB-GENE-030711-1]
ENSDARG00000045064	ablim1b	1224.74	-1.69146	0.359405	-4.70629	2.52265e-06	0.000136457	actin binding LIM protein 1b [Source:ZFIN;Acc:ZDB-GENE-050327-91]
ENSDARG00000020953	dnajb6b	434.548	-1.68888	0.356968	-4.73117	2.23227e-06	0.000124133	DnaJ heat shock protein family (Hsp40) member B6b [Source:ZFIN;Acc:ZDB-GENE-040426-1122]
ENSDARG00000012945	tnfsf13b	75.0797	-1.6872	0.461981	-3.65209	0.000260115	0.00503754	TNF superfamily member 13b [Source:ZFIN;Acc:ZDB-GENE-080204-44]
ENSDARG00000045959	csf3r	97.25	-1.68284	0.411783	-4.08672	4.3752e-05	0.00129122	colony stimulating factor 3 receptor (granulocyte) [Source:ZFIN;Acc:ZDB-GENE-080104-4]
ENSDARG00000090873	ccl34a.4	91.7351	-1.68276	0.601657	-2.79687	0.00516007	0.046032	chemokine (C-C motif) ligand 34a, duplicate 4 [Source:ZFIN;Acc:ZDB-GENE-070912-32]
ENSDARG00000102332	spint1a	1295.64	-1.68232	0.432039	-3.89391	9.86421e-05	0.0024178	serine peptidase inhibitor, Kunitz type 1 a [Source:ZFIN;Acc:ZDB-GENE-040426-2169]
ENSDARG00000032932	cnksr1	234.659	-1.68023	0.381134	-4.4085	1.04088e-05	0.000408204	connector enhancer of kinase suppressor of Ras 1 [Source:ZFIN;Acc:ZDB-GENE-040426-1802]
ENSDARG00000054914	dgat1b	638.269	-1.67801	0.376034	-4.46239	8.10517e-06	0.000338555	diacylglycerol O-acyltransferase 1b [Source:ZFIN;Acc:ZDB-GENE-040718-158]
ENSDARG00000059906	sdc4	1807.62	-1.67787	0.447408	-3.7502	0.000176696	0.0037562	syndecan 4 [Source:ZFIN;Acc:ZDB-GENE-061111-1]
ENSDARG00000032631	ltb4r	107.726	-1.67604	0.458006	-3.65943	0.000252772	0.00491869	leukotriene B4 receptor [Source:ZFIN;Acc:ZDB-GENE-070705-164]
ENSDARG00000061194	hectd2	47.8414	-1.67558	0.585617	-2.86122	0.00422018	0.0398838	HECT domain containing 2 [Source:ZFIN;Acc:ZDB-GENE-100405-3]
ENSDARG00000076923	kazna	147.666	-1.67367	0.477289	-3.50662	0.000453842	0.00755382	kazrin, periplakin interacting protein a [Source:NCBI gene;Acc:100003663]
ENSDARG00000104181	tmsb1	4870.04	-1.67309	0.597333	-2.80093	0.00509548	0.0456867	thymosin beta 1 [Source:ZFIN;Acc:ZDB-GENE-030131-8575]
ENSDARG00000054755	alox5ap	40.3333	-1.67151	0.52744	-3.16909	0.00152917	0.0191198	arachidonate 5-lipoxygenase-activating protein [Source:ZFIN;Acc:ZDB-GENE-030131-9322]
ENSDARG00000098820	ftr67	384.598	-1.67084	0.436875	-3.82453	0.00013102	0.00299538	finTRIM family, member 67 [Source:ZFIN;Acc:ZDB-GENE-060312-27]
ENSDARG00000076800	tnfrsf18	62.8232	-1.66699	0.597937	-2.7879	0.00530517	0.0469483	tumor necrosis factor receptor superfamily, member 18 [Source:ZFIN;Acc:ZDB-GENE-101104-7]
ENSDARG00000004877	rock2b	626.611	-1.6669	0.379504	-4.39231	1.12154e-05	0.00043154	rho-associated, coiled-coil containing protein kinase 2b [Source:ZFIN;Acc:ZDB-GENE-060125-2]
ENSDARG00000101914	metrnla	452.702	-1.66308	0.3297	-5.04423	4.5535e-07	3.50413e-05	meteorin like, glial cell differentiation regulator a [Source:NCBI gene;Acc:406258]
ENSDARG00000017757	pik3cg	676.248	-1.66305	0.273941	-6.07081	1.27269e-09	2.70354e-07	phosphatidylinositol-4,5-bisphosphate 3-kinase, catalytic subunit gamma [Source:ZFIN;Acc:ZDB-GENE-040426-2532]
ENSDARG00000042872	zdhhc8a	66.1787	-1.6516	0.515192	-3.20579	0.00134693	0.0172434	zinc finger DHHC-type containing 8a [Source:ZFIN;Acc:ZDB-GENE-091118-26]
ENSDARG00000032765	net1	1085.75	-1.65147	0.311762	-5.2972	1.17591e-07	1.19902e-05	neuroepithelial cell transforming 1 [Source:ZFIN;Acc:ZDB-GENE-041121-18]
ENSDARG00000056653	fhl1b	406.87	-1.65029	0.474743	-3.47618	0.000508619	0.00823849	four and a half LIM domains 1b [Source:ZFIN;Acc:ZDB-GENE-031219-1]
ENSDARG00000074302	gpr183b	20.4337	-1.64917	0.552248	-2.98628	0.00282393	0.0299627	G protein-coupled receptor 183b [Source:NCBI gene;Acc:100150688]
ENSDARG00000060830	fam83hb	632.492	-1.64915	0.491848	-3.35296	0.000799518	0.0116129	family with sequence similarity 83 member Hb [Source:NCBI gene;Acc:565918]
ENSDARG00000063539	slc25a15a	83.5175	-1.64737	0.486915	-3.38328	0.000716245	0.0107007	solute carrier family 25 member 15a [Source:ZFIN;Acc:ZDB-GENE-070112-1072]
ENSDARG00000033160	nr1d1	704.033	-1.64734	0.532639	-3.09279	0.00198285	0.023077	nuclear receptor subfamily 1, group d, member 1 [Source:ZFIN;Acc:ZDB-GENE-050105-1]
ENSDARG00000052427	bicdl2	84.2067	-1.64375	0.531289	-3.09388	0.00197556	0.0230743	BICD family like cargo adaptor 2 [Source:NCBI gene;Acc:777640]
ENSDARG00000044341	chst7	292.666	-1.643	0.281365	-5.8394	5.23884e-09	8.77504e-07	carbohydrate (N-acetylglucosamine 6-O) sulfotransferase 7 [Source:ZFIN;Acc:ZDB-GENE-131121-150]
ENSDARG00000019702	aldocb	7883.29	-1.63985	0.252941	-6.48313	8.98366e-11	2.73439e-08	aldolase C, fructose-bisphosphate, b [Source:NCBI gene;Acc:369193]
ENSDARG00000103466	ccl35.1	65.9955	-1.63602	0.490862	-3.33295	0.000859305	0.0122974	chemokine (C-C motif) ligand 35, duplicate 1 [Source:ZFIN;Acc:ZDB-GENE-081022-33]
ENSDARG00000029695	pgp	1279.06	-1.63558	0.542829	-3.01307	0.00258623	0.0281435	phosphoglycolate phosphatase [Source:ZFIN;Acc:ZDB-GENE-030131-6240]
ENSDARG00000014527	pdk3a	218.634	-1.62829	0.309852	-5.25505	1.47983e-07	1.43024e-05	pyruvate dehydrogenase kinase, isozyme 3a [Source:ZFIN;Acc:ZDB-GENE-061220-3]
ENSDARG00000097718	stard10	348.386	-1.62815	0.343314	-4.74245	2.11147e-06	0.000120614	StAR-related lipid transfer (START) domain containing 10 [Source:ZFIN;Acc:ZDB-GENE-040426-1797]
ENSDARG00000075864	igsf9a	452.249	-1.61845	0.510927	-3.16767	0.00153668	0.019202	immunoglobulin superfamily, member 9a [Source:ZFIN;Acc:ZDB-GENE-060503-288]
ENSDARG00000099441	cbx4	146.765	-1.61799	0.315654	-5.12585	2.96195e-07	2.50278e-05	chromobox homolog 4 (Pc class homolog, Drosophila) [Source:ZFIN;Acc:ZDB-GENE-040329-2]
ENSDARG00000016676	gnao1a	1050.1	-1.61538	0.481921	-3.35196	0.000802421	0.0116394	guanine nucleotide binding protein (G protein), alpha activating activity polypeptide O, a [Source:ZFIN;Acc:ZDB-GENE-040426-1757]
ENSDARG00000005372	camk4	691.958	-1.61518	0.584765	-2.7621	0.00574314	0.049802	calcium/calmodulin-dependent protein kinase IV [Source:ZFIN;Acc:ZDB-GENE-050417-76]
ENSDARG00000001733	gulp1a	179.892	-1.6134	0.474035	-3.40355	0.000665173	0.0100779	GULP PTB domain containing engulfment adaptor 1a [Source:NCBI gene;Acc:368404]
ENSDARG00000061985	rbm47	1967.11	-1.61098	0.367885	-4.37904	1.19204e-05	0.000454201	RNA binding motif protein 47 [Source:ZFIN;Acc:ZDB-GENE-030131-9612]
ENSDARG00000055540	pfkfb4a	1039.48	-1.60951	0.391716	-4.10886	3.97618e-05	0.00119069	6-phosphofructo-2-kinase/fructose-2,6-biphosphatase 4a [Source:ZFIN;Acc:ZDB-GENE-051120-51]
ENSDARG00000006603	csrp1a	307.049	-1.60818	0.43872	-3.66561	0.000246746	0.00482906	cysteine and glycine-rich protein 1a [Source:ZFIN;Acc:ZDB-GENE-030909-4]
ENSDARG00000035514	adam28	580.948	-1.6023	0.368339	-4.35008	1.36091e-05	0.000500957	ADAM metallopeptidase domain 28 [Source:ZFIN;Acc:ZDB-GENE-060929-532]
ENSDARG00000056642	hdac9b	569.78	-1.60211	0.288752	-5.54839	2.88314e-08	3.65191e-06	histone deacetylase 9b [Source:NCBI gene;Acc:393789]
ENSDARG00000054543	samsn1a	158.424	-1.60174	0.330214	-4.85061	1.23085e-06	7.84399e-05	SAM domain, SH3 domain and nuclear localisation signals 1a [Source:ZFIN;Acc:ZDB-GENE-030131-8639]
ENSDARG00000089314	mapta	474.895	-1.59378	0.413219	-3.85698	0.000114797	0.00270956	microtubule-associated protein tau a [Source:ZFIN;Acc:ZDB-GENE-081027-1]
ENSDARG00000070227	nhsa	62.7515	-1.5932	0.447766	-3.5581	0.000373553	0.00654457	Nance-Horan syndrome a (congenital cataracts and dental anomalies) [Source:ZFIN;Acc:ZDB-GENE-090617-1]
ENSDARG00000024967	fancg	45.8603	-1.59094	0.531726	-2.99203	0.00277129	0.029589	FA complementation group G [Source:ZFIN;Acc:ZDB-GENE-050417-103]
ENSDARG00000017834	micall2b	265.643	-1.58731	0.463153	-3.42719	0.000609873	0.00942922	mical-like 2b [Source:ZFIN;Acc:ZDB-GENE-030131-5803]
ENSDARG00000099802	pnp5b	160.577	-1.58561	0.416657	-3.80556	0.000141485	0.00318818	purine nucleoside phosphorylase 5b [Source:ZFIN;Acc:ZDB-GENE-040912-54]
ENSDARG00000052741	card11	274.643	-1.58248	0.434037	-3.64595	0.000266408	0.0051205	caspase recruitment domain family, member 11 [Source:ZFIN;Acc:ZDB-GENE-100219-1]
ENSDARG00000055226	slc7a7	704.759	-1.57846	0.528071	-2.98911	0.00279788	0.0297328	solute carrier family 7 member 7 [Source:ZFIN;Acc:ZDB-GENE-051127-5]
ENSDARG00000057787	itgae.2	360.439	-1.57278	0.407045	-3.86389	0.000111594	0.00264621	integrin, alpha E, tandem duplicate 2 [Source:ZFIN;Acc:ZDB-GENE-130530-671]
ENSDARG00000058666	dennd2da	1033.56	-1.57073	0.282882	-5.5526	2.81446e-08	3.63261e-06	DENN/MADD domain containing 2Da [Source:ZFIN;Acc:ZDB-GENE-061013-542]
ENSDARG00000067723	tank	134.324	-1.56868	0.44737	-3.50645	0.000454126	0.00755382	TRAF family member-associated NFKB activator [Source:ZFIN;Acc:ZDB-GENE-060929-308]
ENSDARG00000023062	ccn1	370.231	-1.56223	0.499345	-3.12856	0.00175666	0.0210851	cellular communication network factor 1 [Source:ZFIN;Acc:ZDB-GENE-040426-3]
ENSDARG00000059900	tbc1d9	326.769	-1.55943	0.422095	-3.69449	0.000220325	0.0044486	TBC1 domain family, member 9 (with GRAM domain) [Source:ZFIN;Acc:ZDB-GENE-060810-33]
ENSDARG00000074850	il12rb2l	407.032	-1.55739	0.321604	-4.84258	1.28164e-06	8.14222e-05	interleukin 12 receptor, beta 2a, like [Source:ZFIN;Acc:ZDB-GENE-080107-6]
ENSDARG00000079097	tanc2a	590.274	-1.55566	0.442593	-3.51487	0.000439963	0.0073663	tetratricopeptide repeat, ankyrin repeat and coiled-coil containing 2a [Source:ZFIN;Acc:ZDB-GENE-060130-180]
ENSDARG00000076789	cx32.2	106.496	-1.55382	0.384954	-4.03637	5.4285e-05	0.00152905	connexin 32.2 [Source:NCBI gene;Acc:566647]
ENSDARG00000056477	ccdc125	231.011	-1.54956	0.544647	-2.84507	0.0044401	0.0414213	coiled-coil domain containing 125 [Source:NCBI gene;Acc:565477]
ENSDARG00000018976	sptlc2a	226.424	-1.54138	0.407269	-3.78466	0.000153918	0.00340439	serine palmitoyltransferase, long chain base subunit 2a [Source:ZFIN;Acc:ZDB-GENE-050522-23]
ENSDARG00000101358	pard3aa	21.3189	-1.53859	0.479971	-3.20558	0.00134791	0.0172446	par-3 family cell polarity regulator alpha, a [Source:ZFIN;Acc:ZDB-GENE-170531-1]
ENSDARG00000015449	fut8a	908.812	-1.52704	0.333533	-4.57838	4.6858e-06	0.000224812	fucosyltransferase 8a (alpha (1,6) fucosyltransferase) [Source:ZFIN;Acc:ZDB-GENE-031118-20]
ENSDARG00000009336	aif1l	658.952	-1.52489	0.279289	-5.45991	4.76382e-08	5.64818e-06	allograft inflammatory factor 1-like [Source:ZFIN;Acc:ZDB-GENE-030131-9646]
ENSDARG00000087646	runx1	29.1293	-1.52353	0.53155	-2.8662	0.00415435	0.0393698	RUNX family transcription factor 1 [Source:ZFIN;Acc:ZDB-GENE-000605-1]
ENSDARG00000068628	rab8b	713.734	-1.52274	0.318275	-4.78437	1.71527e-06	0.000102279	RAB8B, member RAS oncogene family [Source:ZFIN;Acc:ZDB-GENE-070620-16]
ENSDARG00000006308	ptpn18	92.2759	-1.51609	0.474945	-3.19213	0.00141227	0.017933	protein tyrosine phosphatase non-receptor type 18 [Source:ZFIN;Acc:ZDB-GENE-050320-12]
ENSDARG00000091926	casp22	308.597	-1.5155	0.540514	-2.80381	0.00505032	0.0453705	caspase 22, apoptosis-related cysteine peptidase [Source:ZFIN;Acc:ZDB-GENE-060526-186]
ENSDARG00000053425	serinc2l	370.137	-1.51269	0.461108	-3.28055	0.00103604	0.0141746	serine incorporator 2, like [Source:ZFIN;Acc:ZDB-GENE-100921-58]
ENSDARG00000012972	cfl1l	2611.92	-1.50381	0.477026	-3.15247	0.00161897	0.0199853	cofilin 1 (non-muscle), like [Source:ZFIN;Acc:ZDB-GENE-040426-2770]
ENSDARG00000022841	ptk2ba	140.069	-1.50107	0.354756	-4.23126	2.32384e-05	0.00076559	protein tyrosine kinase 2 beta, a [Source:ZFIN;Acc:ZDB-GENE-080207-1]
ENSDARG00000079412	ftr02	57.945	-1.49564	0.439156	-3.40571	0.000659922	0.0100115	finTRIM family, member 2 [Source:ZFIN;Acc:ZDB-GENE-070424-5]
ENSDARG00000015576	itprip	64.2217	-1.49395	0.313862	-4.75991	1.9368e-06	0.000112849	inositol 1,4,5-trisphosphate receptor interacting protein [Source:NCBI gene;Acc:550570]
ENSDARG00000069314	tmem199	86.1061	-1.49348	0.38306	-3.89882	9.66623e-05	0.0023836	transmembrane protein 199 [Source:ZFIN;Acc:ZDB-GENE-050522-150]
ENSDARG00000025397	srsf3a	49.1556	-1.49295	0.492956	-3.02857	0.00245715	0.0270711	serine and arginine rich splicing factor 3a [Source:ZFIN;Acc:ZDB-GENE-030616-631]
ENSDARG00000054749	lmo4b	346.022	-1.49271	0.539202	-2.76837	0.00563368	0.0490345	LIM domain only 4b [Source:ZFIN;Acc:ZDB-GENE-030131-3570]
ENSDARG00000104090	june	275.784	-1.49155	0.418738	-3.56203	0.000368003	0.00648805	JunE proto-oncogene, AP-1 transcription factor subunit [Source:NCBI gene;Acc:767776]
ENSDARG00000042690	s1pr1	443.932	-1.48602	0.491506	-3.0234	0.00249949	0.0274044	sphingosine-1-phosphate receptor 1 [Source:NCBI gene;Acc:64617]
ENSDARG00000104118	antxr2a	390.438	-1.4723	0.299309	-4.91899	8.69939e-07	5.85501e-05	ANTXR cell adhesion molecule 2a [Source:ZFIN;Acc:ZDB-GENE-060526-14]
ENSDARG00000055713	fmnl1a	581.924	-1.46994	0.233383	-6.29838	3.0078e-10	7.60507e-08	formin-like 1a [Source:ZFIN;Acc:ZDB-GENE-120215-83]
ENSDARG00000098414	ninl	61.2231	-1.46921	0.457813	-3.20919	0.0013311	0.0171239	ninein-like [Source:ZFIN;Acc:ZDB-GENE-130530-768]
ENSDARG00000103266	ogal	690.093	-1.46631	0.520258	-2.81842	0.004826	0.0441528	O-GlcNAcase like [Source:ZFIN;Acc:ZDB-GENE-110914-153]
ENSDARG00000074851	s1pr4	65.4728	-1.46461	0.47782	-3.06519	0.00217533	0.0246864	sphingosine-1-phosphate receptor 4 [Source:ZFIN;Acc:ZDB-GENE-050506-8]
ENSDARG00000100020	pim1	3391.7	-1.4622	0.421144	-3.47198	0.000516636	0.00835508	Pim-1 proto-oncogene, serine/threonine kinase [Source:ZFIN;Acc:ZDB-GENE-061013-139]
ENSDARG00000075831	slc7a8a	1293.82	-1.46066	0.503387	-2.90168	0.00371172	0.0364084	solute carrier family 7 member 8a [Source:ZFIN;Acc:ZDB-GENE-121120-2]
ENSDARG00000040041	mcm4	357.56	-1.46004	0.454806	-3.21025	0.00132618	0.0170846	minichromosome maintenance complex component 4 [Source:ZFIN;Acc:ZDB-GENE-030131-9544]
ENSDARG00000073753	tacc1	599.921	-1.45622	0.276778	-5.26133	1.43018e-07	1.40975e-05	transforming, acidic coiled-coil containing protein 1 [Source:ZFIN;Acc:ZDB-GENE-090521-5]
ENSDARG00000017321	kdr	283.18	-1.45525	0.497334	-2.92611	0.00343232	0.0344804	kinase insert domain receptor (a type III receptor tyrosine kinase) [Source:NCBI gene;Acc:554230]
ENSDARG00000009266	uevld	153.98	-1.44883	0.273238	-5.30243	1.14271e-07	1.17102e-05	UEV and lactate/malate dehyrogenase domains [Source:NCBI gene;Acc:445225]
ENSDARG00000024874	dock4b	621.82	-1.44818	0.43619	-3.32007	0.000899965	0.012754	dedicator of cytokinesis 4b [Source:ZFIN;Acc:ZDB-GENE-060130-74]
ENSDARG00000037030	casz1	431.359	-1.44539	0.483426	-2.98988	0.00279084	0.0297199	castor zinc finger 1 [Source:ZFIN;Acc:ZDB-GENE-060130-108]
ENSDARG00000079095	rin1a	121.258	-1.4382	0.376262	-3.82234	0.000132192	0.00301206	Ras and Rab interactor 1a [Source:ZFIN;Acc:ZDB-GENE-091204-129]
ENSDARG00000074390	tmem176l.4	679.258	-1.4344	0.302514	-4.74159	2.12043e-06	0.000120788	transmembrane protein 176l.4 [Source:ZFIN;Acc:ZDB-GENE-030131-3532]
ENSDARG00000103607	wtip	57.2035	-1.43288	0.440234	-3.25481	0.00113468	0.0151766	WT1 interacting protein [Source:NCBI gene;Acc:566046]
ENSDARG00000039754	xpc	235.748	-1.43012	0.31918	-4.48062	7.4428e-06	0.000315882	xeroderma pigmentosum, complementation group C [Source:ZFIN;Acc:ZDB-GENE-030131-8461]
ENSDARG00000045367	tuba1b	578.287	-1.4237	0.445823	-3.19342	0.00140596	0.0178752	tubulin, alpha 1b [Source:ZFIN;Acc:ZDB-GENE-030822-1]
ENSDARG00000070427	s100v1	516.291	-1.4217	0.447545	-3.17666	0.00148983	0.0187543	S100 calcium binding protein V1 [Source:ZFIN;Acc:ZDB-GENE-080407-1]
ENSDARG00000006052	malt2	324.677	-1.42017	0.341325	-4.16077	3.17177e-05	0.000994662	MALT paracaspase 2 [Source:ZFIN;Acc:ZDB-GENE-020801-2]
ENSDARG00000031817	trim2a	167.744	-1.41168	0.384228	-3.67408	0.000238711	0.00471758	tripartite motif containing 2a [Source:ZFIN;Acc:ZDB-GENE-050327-99]
ENSDARG00000079315	lpxn	74.6257	-1.40264	0.408848	-3.43071	0.000602001	0.00933582	leupaxin [Source:ZFIN;Acc:ZDB-GENE-081105-159]
ENSDARG00000010415	sirt4	82.4789	-1.39955	0.328724	-4.25751	2.06715e-05	0.000700254	sirtuin 4 [Source:ZFIN;Acc:ZDB-GENE-041010-65]
ENSDARG00000099448	sh3d21	412.163	-1.39909	0.454334	-3.07943	0.002074	0.0238417	SH3 domain containing 21 [Source:ZFIN;Acc:ZDB-GENE-051120-57]
ENSDARG00000003446	ippk	366.46	-1.39896	0.390795	-3.57978	0.000343888	0.00617333	inositol 1,3,4,5,6-pentakisphosphate 2-kinase [Source:NCBI gene;Acc:541511]
ENSDARG00000002396	cry-dash	180.136	-1.39855	0.31078	-4.50011	6.79174e-06	0.000295281	cryptochrome DASH [Source:NCBI gene;Acc:402986]
ENSDARG00000077948	usp54a	507.831	-1.39164	0.32828	-4.23921	2.24313e-05	0.000747452	ubiquitin specific peptidase 54a [Source:ZFIN;Acc:ZDB-GENE-090828-2]
ENSDARG00000094854	ms4a17a.9	79.1631	-1.38543	0.443162	-3.12624	0.00177058	0.0212022	membrane-spanning 4-domains, subfamily A, member 17A.9 [Source:ZFIN;Acc:ZDB-GENE-050320-79]
ENSDARG00000076765	ddhd2	320.75	-1.38501	0.331697	-4.17553	2.97294e-05	0.000947299	DDHD domain containing 2 [Source:ZFIN;Acc:ZDB-GENE-080519-4]
ENSDARG00000040700	nab1b	80.0558	-1.38487	0.415459	-3.33335	0.000858057	0.0122882	NGFI-A binding protein 1b (EGR1 binding protein 1) [Source:ZFIN;Acc:ZDB-GENE-081105-85]
ENSDARG00000003699	atp7a	674.63	-1.38469	0.367883	-3.76394	0.00016726	0.00361328	ATPase copper transporting alpha [Source:ZFIN;Acc:ZDB-GENE-060825-45]
ENSDARG00000087804	tnfrsf11a	338.793	-1.37929	0.331404	-4.16196	3.15524e-05	0.000994662	tumor necrosis factor receptor superfamily, member 11a, NFKB activator [Source:ZFIN;Acc:ZDB-GENE-120910-2]
ENSDARG00000016607	echdc2	541.5	-1.37358	0.386185	-3.55678	0.00037543	0.00656054	enoyl CoA hydratase domain containing 2 [Source:ZFIN;Acc:ZDB-GENE-030219-147]
ENSDARG00000067916	lyn	458.834	-1.37326	0.286063	-4.80054	1.58235e-06	9.54702e-05	LYN proto-oncogene, Src family tyrosine kinase [Source:ZFIN;Acc:ZDB-GENE-040912-7]
ENSDARG00000078882	slc22a31	357.996	-1.36995	0.401998	-3.40786	0.000654742	0.00995687	solute carrier family 22 member 31 [Source:ZFIN;Acc:ZDB-GENE-130530-858]
ENSDARG00000056874	lygl1	3853.69	-1.36423	0.315174	-4.32852	1.50117e-05	0.000538272	lysozyme g-like 1 [Source:ZFIN;Acc:ZDB-GENE-040718-461]
ENSDARG00000005651	hrasb	310.059	-1.36409	0.460178	-2.96426	0.00303411	0.0315848	HRas proto-oncogene, GTPase b [Source:ZFIN;Acc:ZDB-GENE-050522-466]
ENSDARG00000063634	hpse	382.945	-1.36113	0.468498	-2.90532	0.00366882	0.0361441	heparanase [Source:ZFIN;Acc:ZDB-GENE-041111-200]
ENSDARG00000062936	ndnf	148.002	-1.36036	0.441959	-3.07803	0.00208373	0.0239265	neuron-derived neurotrophic factor [Source:ZFIN;Acc:ZDB-GENE-030131-207]
ENSDARG00000020777	cep85l	269.07	-1.35836	0.404134	-3.36117	0.000776139	0.0113787	centrosomal protein 85, like [Source:ZFIN;Acc:ZDB-GENE-041014-309]
ENSDARG00000099385	lsp1b	329.203	-1.35835	0.34476	-3.93999	8.14851e-05	0.00209549	lymphocyte specific protein 1 b [Source:ZFIN;Acc:ZDB-GENE-141222-12]
ENSDARG00000040764	id1	197.822	-1.3582	0.366107	-3.70985	0.000207378	0.00425116	inhibitor of DNA binding 1, HLH protein [Source:ZFIN;Acc:ZDB-GENE-990415-96]
ENSDARG00000036175	pcdh1b	892.841	-1.35787	0.382446	-3.55049	0.000384516	0.00667925	protocadherin 1b [Source:ZFIN;Acc:ZDB-GENE-091015-2]
ENSDARG00000060504	pfkla	405.279	-1.35639	0.338421	-4.00801	6.1233e-05	0.00167839	phosphofructokinase, liver a [Source:ZFIN;Acc:ZDB-GENE-121207-1]
ENSDARG00000071015	pbxip1a	917.183	-1.35635	0.287978	-4.7099	2.47837e-06	0.000134777	pre-B-cell leukemia homeobox interacting protein 1a [Source:ZFIN;Acc:ZDB-GENE-060503-871]
ENSDARG00000027689	pold1	194.37	-1.35259	0.350512	-3.8589	0.000113897	0.00269142	polymerase (DNA directed), delta 1, catalytic subunit [Source:ZFIN;Acc:ZDB-GENE-060429-1]
ENSDARG00000021938	smad9	119.334	-1.34836	0.300582	-4.48584	7.26279e-06	0.000310503	SMAD family member 9 [Source:ZFIN;Acc:ZDB-GENE-031014-1]
ENSDARG00000105261	nfkb1	136.301	-1.34709	0.226789	-5.93981	2.85347e-09	5.48333e-07	nuclear factor of kappa light polypeptide gene enhancer in B-cells 1 [Source:ZFIN;Acc:ZDB-GENE-121204-3]
ENSDARG00000017988	dse	222.047	-1.34627	0.437738	-3.07553	0.00210129	0.0240334	dermatan sulfate epimerase [Source:ZFIN;Acc:ZDB-GENE-041001-202]
ENSDARG00000101441	lima1a	330.458	-1.34541	0.370144	-3.63483	0.000278169	0.00525737	LIM domain and actin binding 1a [Source:ZFIN;Acc:ZDB-GENE-001120-1]
ENSDARG00000098640	CU984600.3	105.153	-1.34418	0.459991	-2.9222	0.00347569	0.0348132	immunoglobulin superfamily member 3-like [Source:NCBI gene;Acc:100005927]
ENSDARG00000011533	sema6dl	444.112	-1.34284	0.307501	-4.36694	1.26002e-05	0.000473215	sema domain, transmembrane domain (TM), and cytoplasmic domain, (semaphorin) 6D, like [Source:ZFIN;Acc:ZDB-GENE-050417-171]
ENSDARG00000039319	vps37b	226.001	-1.34139	0.342303	-3.91872	8.90221e-05	0.00223851	VPS37B subunit of ESCRT-I [Source:ZFIN;Acc:ZDB-GENE-060526-254]
ENSDARG00000008434	bcl2l1	702.239	-1.34045	0.310469	-4.31749	1.57815e-05	0.000562762	BCL2 like 1 [Source:ZFIN;Acc:ZDB-GENE-010730-1]
ENSDARG00000061796	rasgrp4	223.624	-1.33909	0.411329	-3.25551	0.0011319	0.0151661	RAS guanyl releasing protein 4 [Source:ZFIN;Acc:ZDB-GENE-050419-110]
ENSDARG00000053466	timmdc1	407.17	-1.33861	0.147339	-9.08528	1.03429e-19	1.40615e-16	translocase of inner mitochondrial membrane domain containing 1 [Source:NCBI gene;Acc:550526]
ENSDARG00000055875	pag1	670.723	-1.33761	0.34813	-3.84229	0.000121893	0.00283763	phosphoprotein membrane anchor with glycosphingolipid microdomains 1 [Source:ZFIN;Acc:ZDB-GENE-060503-586]
ENSDARG00000021455	strbp	346.747	-1.32544	0.331929	-3.99316	6.51995e-05	0.0017518	spermatid perinuclear RNA binding protein [Source:ZFIN;Acc:ZDB-GENE-030729-18]
ENSDARG00000013847	egfra	462.281	-1.32472	0.286356	-4.62612	3.72582e-06	0.000184868	epidermal growth factor receptor a (erythroblastic leukemia viral (v-erb-b) oncogene homolog, avian) [Source:ZFIN;Acc:ZDB-GENE-030918-1]
ENSDARG00000062552	lpar6a	458.383	-1.31422	0.360899	-3.6415	0.000271054	0.00518536	lysophosphatidic acid receptor 6a [Source:ZFIN;Acc:ZDB-GENE-061013-343]
ENSDARG00000038428	sulf1	305.742	-1.3128	0.475347	-2.76178	0.00574873	0.049802	sulfatase 1 [Source:ZFIN;Acc:ZDB-GENE-030131-9242]
ENSDARG00000103108	acvr2bb	40.044	-1.31171	0.435802	-3.00989	0.00261344	0.0284071	activin A receptor type 2Bb [Source:ZFIN;Acc:ZDB-GENE-170621-5]
ENSDARG00000103799	kars1	5096.94	-1.31037	0.233447	-5.61313	1.98697e-08	2.70135e-06	lysyl-tRNA synthetase 1 [Source:ZFIN;Acc:ZDB-GENE-021115-8]
ENSDARG00000024954	tmed4	92.2831	-1.30945	0.425445	-3.07784	0.00208505	0.0239282	transmembrane p24 trafficking protein 4 [Source:ZFIN;Acc:ZDB-GENE-040625-140]
ENSDARG00000057303	galnt7	1124.11	-1.30892	0.290159	-4.51104	6.45118e-06	0.000285377	UDP-N-acetyl-alpha-D-galactosamine: polypeptide N-acetylgalactosaminyltransferase 7 [Source:ZFIN;Acc:ZDB-GENE-050522-284]
ENSDARG00000040251	ctsk	1802.38	-1.30466	0.3551	-3.67405	0.000238736	0.00471758	cathepsin K [Source:ZFIN;Acc:ZDB-GENE-001205-4]
ENSDARG00000021647	gnai1	1851.71	-1.30195	0.291434	-4.46738	7.91837e-06	0.00033158	guanine nucleotide binding protein (G protein), alpha inhibiting activity polypeptide 1 [Source:ZFIN;Acc:ZDB-GENE-040426-1310]
ENSDARG00000039914	gapdhs	9227.78	-1.29936	0.303512	-4.28108	1.85989e-05	0.000647248	glyceraldehyde-3-phosphate dehydrogenase, spermatogenic [Source:NCBI gene;Acc:406367]
ENSDARG00000074307	rapgef5b	110.094	-1.29664	0.34981	-3.7067	0.000209981	0.00429934	Rap guanine nucleotide exchange factor (GEF) 5b [Source:ZFIN;Acc:ZDB-GENE-061215-2]
ENSDARG00000057626	josd2	134.118	-1.29595	0.419013	-3.09287	0.0019823	0.023077	Josephin domain containing 2 [Source:ZFIN;Acc:ZDB-GENE-040426-850]
ENSDARG00000075053	sccpdha.2	1046.24	-1.29186	0.301388	-4.28639	1.81604e-05	0.000634152	saccharopine dehydrogenase a, tandem duplicate 2 [Source:ZFIN;Acc:ZDB-GENE-080212-12]
ENSDARG00000010556	mmp25b	51.9707	-1.28894	0.460469	-2.79919	0.00512304	0.0457818	matrix metallopeptidase 25b [Source:ZFIN;Acc:ZDB-GENE-100308-4]
ENSDARG00000080020	il13ra1	443.854	-1.28534	0.437241	-2.93966	0.00328569	0.0335193	interleukin 13 receptor, alpha 1 [Source:ZFIN;Acc:ZDB-GENE-060503-103]
ENSDARG00000075149	nagpa	292.224	-1.27763	0.244441	-5.22674	1.7252e-07	1.60751e-05	N-acetylglucosamine-1-phosphodiester alpha-N-acetylglucosaminidase [Source:ZFIN;Acc:ZDB-GENE-070928-4]
ENSDARG00000038123	myl9a	671.175	-1.27724	0.39711	-3.21633	0.0012984	0.016833	myosin, light chain 9a, regulatory [Source:ZFIN;Acc:ZDB-GENE-041010-120]
ENSDARG00000062055	rnf38	350.221	-1.27279	0.426496	-2.9843	0.00284231	0.0300639	ring finger protein 38 [Source:ZFIN;Acc:ZDB-GENE-030131-8693]
ENSDARG00000060238	uacab	664.135	-1.27248	0.43943	-2.89576	0.00378247	0.0369072	uveal autoantigen with coiled-coil domains and ankyrin repeats b [Source:ZFIN;Acc:ZDB-GENE-030521-32]
ENSDARG00000102556	nfat5b	75.8121	-1.27158	0.34672	-3.66746	0.000244969	0.00480813	nuclear factor of activated T cells 5b [Source:ZFIN;Acc:ZDB-GENE-140106-7]
ENSDARG00000005821	ncf2	122.472	-1.27036	0.394748	-3.21816	0.00129015	0.0167473	neutrophil cytosolic factor 2 [Source:ZFIN;Acc:ZDB-GENE-070209-29]
ENSDARG00000057644	adam8b	289.258	-1.26972	0.444959	-2.85357	0.00432307	0.0405335	ADAM metallopeptidase domain 8b [Source:ZFIN;Acc:ZDB-GENE-070808-1]
ENSDARG00000079201	tshz2	351.231	-1.26947	0.295793	-4.29174	1.77275e-05	0.000621164	teashirt zinc finger homeobox 2 [Source:ZFIN;Acc:ZDB-GENE-100322-2]
ENSDARG00000004301	rhogb	385.167	-1.2693	0.306152	-4.146	3.38334e-05	0.0010454	ras homolog family member Gb [Source:ZFIN;Acc:ZDB-GENE-030131-8877]
ENSDARG00000112943	adgre5b.3	225.654	-1.26559	0.353662	-3.57851	0.000345552	0.00619231	adhesion G protein-coupled receptor E5b, duplicate 3 [Source:ZFIN;Acc:ZDB-GENE-121214-275]
ENSDARG00000011961	csrp2	158.092	-1.26434	0.342066	-3.69618	0.000218871	0.00442802	cysteine and glycine-rich protein 2 [Source:ZFIN;Acc:ZDB-GENE-040426-1863]
ENSDARG00000090730	cfbl	547.586	-1.26325	0.416434	-3.03349	0.00241746	0.0267495	complement factor b, like [Source:ZFIN;Acc:ZDB-GENE-030131-2319]
ENSDARG00000070122	stk11ip	386.218	-1.25477	0.385342	-3.25625	0.00112895	0.0151465	serine/threonine kinase 11 interacting protein [Source:ZFIN;Acc:ZDB-GENE-040426-1022]
ENSDARG00000053097	hsf2	360.263	-1.25341	0.317035	-3.95353	7.70067e-05	0.00201851	heat shock transcription factor 2 [Source:ZFIN;Acc:ZDB-GENE-011128-1]
ENSDARG00000061173	st14a	713.12	-1.25068	0.386299	-3.2376	0.0012054	0.0158592	suppression of tumorigenicity 14a [Source:ZFIN;Acc:ZDB-GENE-030131-6496]
ENSDARG00000068745	map4l	2687.97	-1.24977	0.402425	-3.1056	0.00189892	0.0223842	microtubule associated protein 4 like [Source:ZFIN;Acc:ZDB-GENE-070912-581]
ENSDARG00000067713	snx18a	391.239	-1.24713	0.41326	-3.01779	0.00254623	0.0277675	sorting nexin 18a [Source:ZFIN;Acc:ZDB-GENE-070705-339]
ENSDARG00000109820	NPAS3	255.344	-1.24552	0.43841	-2.841	0.00449722	0.0418203	neuronal PAS domain protein 3 [Source:NCBI gene;Acc:570491]
ENSDARG00000075456	pik3ca	266.407	-1.24491	0.222839	-5.58656	2.31609e-08	3.05242e-06	phosphatidylinositol-4,5-bisphosphate 3-kinase, catalytic subunit alpha [Source:ZFIN;Acc:ZDB-GENE-130409-1]
ENSDARG00000095654	tns3.1	57.0895	-1.23673	0.409938	-3.01688	0.0025539	0.0278214	tensin 3, tandem duplicate 1 [Source:ZFIN;Acc:ZDB-GENE-081030-22]
ENSDARG00000058647	hck	371.055	-1.23395	0.253792	-4.86207	1.16167e-06	7.4263e-05	HCK proto-oncogene, Src family tyrosine kinase [Source:ZFIN;Acc:ZDB-GENE-090313-72]
ENSDARG00000115549	NCEH1	247.482	-1.23348	0.356149	-3.46337	0.000533459	0.00854274	neutral cholesterol ester hydrolase 1-like [Source:NCBI gene;Acc:797436]
ENSDARG00000035858	cnn2	1454.14	-1.23326	0.315589	-3.9078	9.31419e-05	0.00232019	calponin 2 [Source:ZFIN;Acc:ZDB-GENE-030131-542]
ENSDARG00000055912	nipa2	793.441	-1.22405	0.267025	-4.58403	4.56095e-06	0.000219885	NIPA magnesium transporter 2 [Source:ZFIN;Acc:ZDB-GENE-040426-2134]
ENSDARG00000045827	lyrm5b	62.0529	-1.22202	0.309173	-3.95255	7.73235e-05	0.00202221	LYR motif containing 5b [Source:NCBI gene;Acc:561760]
ENSDARG00000002791	atp1a1a.1	9351.32	-1.22047	0.21852	-5.58515	2.335e-08	3.05242e-06	ATPase Na+/K+ transporting subunit alpha 1a, tandem duplicate 1 [Source:ZFIN;Acc:ZDB-GENE-001212-1]
ENSDARG00000015551	fth1a	14620	-1.21656	0.354794	-3.42891	0.000606008	0.00938369	ferritin, heavy polypeptide 1a [Source:ZFIN;Acc:ZDB-GENE-000831-2]
ENSDARG00000069934	parp4	690.144	-1.21343	0.274006	-4.42848	9.49012e-06	0.000376521	poly (ADP-ribose) polymerase family, member 4 [Source:ZFIN;Acc:ZDB-GENE-070912-387]
ENSDARG00000040380	arhgef1a	661.49	-1.20955	0.350991	-3.44609	0.000568758	0.0089773	Rho guanine nucleotide exchange factor (GEF) 1a [Source:ZFIN;Acc:ZDB-GENE-030722-5]
ENSDARG00000036830	krt91	29959.6	-1.2074	0.428197	-2.81974	0.00480629	0.0440515	keratin 91 [Source:ZFIN;Acc:ZDB-GENE-040801-181]
ENSDARG00000017128	myofl	505.814	-1.20329	0.318673	-3.77594	0.000159408	0.00346719	myoferlin like [Source:ZFIN;Acc:ZDB-GENE-111116-2]
ENSDARG00000101036	traf2b	182.116	-1.20267	0.228592	-5.26123	1.43097e-07	1.40975e-05	Tnf receptor-associated factor 2b [Source:ZFIN;Acc:ZDB-GENE-030131-5345]
ENSDARG00000019274	rasd1	240.244	-1.202	0.400383	-3.00212	0.00268107	0.028898	RAS, dexamethasone-induced 1 [Source:ZFIN;Acc:ZDB-GENE-040426-1473]
ENSDARG00000052496	arhgap45a	130.375	-1.20103	0.421136	-2.85189	0.004346	0.0406737	Rho GTPase activating protein 45a [Source:ZFIN;Acc:ZDB-GENE-140106-47]
ENSDARG00000018411	mknk1	267.751	-1.20003	0.37333	-3.2144	0.00130717	0.0169252	MAPK interacting serine/threonine kinase 1 [Source:ZFIN;Acc:ZDB-GENE-080220-11]
ENSDARG00000058128	msna	1553.2	-1.19679	0.280121	-4.27239	1.93393e-05	0.000667321	moesin a [Source:ZFIN;Acc:ZDB-GENE-021211-2]
ENSDARG00000031757	tmc4	569.404	-1.19364	0.347774	-3.43222	0.000598669	0.00929829	transmembrane channel-like 4 [Source:ZFIN;Acc:ZDB-GENE-030131-7489]
ENSDARG00000094673	rhoab	1230.78	-1.18877	0.27275	-4.35848	1.30968e-05	0.00048827	ras homolog gene family, member Ab [Source:NCBI gene;Acc:100006041]
ENSDARG00000098777	CU693379.1	539.979	-1.1842	0.362393	-3.26772	0.00108419	0.0146457	crystallin beta-gamma domain containing 2 [Source:NCBI gene;Acc:569677]
ENSDARG00000046054	CT027815.1	116.722	-1.18163	0.419386	-2.81752	0.00483958	0.0441887	long-chain fatty acid transport protein 6-like [Source:NCBI gene;Acc:568883]
ENSDARG00000105147	osbpl1a	220.998	-1.17539	0.25252	-4.65464	3.24544e-06	0.000165461	oxysterol binding protein-like 1A [Source:ZFIN;Acc:ZDB-GENE-050208-657]
ENSDARG00000023724	cdc42se1	780.751	-1.17494	0.305448	-3.84662	0.000119757	0.0028039	CDC42 small effector 1 [Source:NCBI gene;Acc:791998]
ENSDARG00000062385	flcn	319.079	-1.1749	0.27906	-4.21019	2.55158e-05	0.000829894	folliculin [Source:ZFIN;Acc:ZDB-GENE-060421-3470]
ENSDARG00000013415	lmna	1702.4	-1.17414	0.403302	-2.91133	0.00359899	0.0357149	lamin A [Source:ZFIN;Acc:ZDB-GENE-020424-3]
ENSDARG00000010519	per3	1726.09	-1.1725	0.329919	-3.55391	0.000379554	0.00661559	period circadian clock 3 [Source:ZFIN;Acc:ZDB-GENE-000804-1]
ENSDARG00000033516	efr3ba	254.982	-1.17201	0.332017	-3.52996	0.000415629	0.00710146	EFR3 homolog Ba (S. cerevisiae) [Source:ZFIN;Acc:ZDB-GENE-030616-64]
ENSDARG00000006491	agpat9l	976.063	-1.1718	0.37235	-3.14703	0.00164936	0.0202241	1-acylglycerol-3-phosphate O-acyltransferase 9, like [Source:NCBI gene;Acc:567414]
ENSDARG00000057273	alox5a	87.4709	-1.17154	0.399457	-2.93284	0.00335882	0.0340162	arachidonate 5-lipoxygenase a [Source:ZFIN;Acc:ZDB-GENE-090311-47]
ENSDARG00000102070	tbc1d10aa	361.909	-1.17107	0.297009	-3.94288	8.05078e-05	0.00208176	TBC1 domain family, member 10Aa [Source:ZFIN;Acc:ZDB-GENE-030131-4497]
ENSDARG00000030914	tmem120a	97.7536	-1.17045	0.348261	-3.36085	0.00077702	0.0113834	transmembrane protein 120A [Source:NCBI gene;Acc:100005623]
ENSDARG00000071251	ppp1r18	153.216	-1.16995	0.3409	-3.43196	0.000599242	0.0093001	protein phosphatase 1, regulatory subunit 18 [Source:ZFIN;Acc:ZDB-GENE-060503-350]
ENSDARG00000071501	hs6st1b	89.8549	-1.16884	0.411412	-2.84106	0.00449645	0.0418203	heparan sulfate 6-O-sulfotransferase 1b [Source:NCBI gene;Acc:791107]
ENSDARG00000017606	sys1	257.81	-1.16781	0.185434	-6.29771	3.0207e-10	7.60507e-08	SYS1 golgi trafficking protein [Source:ZFIN;Acc:ZDB-GENE-030131-8283]
ENSDARG00000075733	zyx	338.589	-1.16605	0.348975	-3.34137	0.000833658	0.0119977	zyxin [Source:ZFIN;Acc:ZDB-GENE-070928-18]
ENSDARG00000012801	pfkpb	424.76	-1.15999	0.32274	-3.5942	0.000325387	0.00594506	phosphofructokinase, platelet b [Source:ZFIN;Acc:ZDB-GENE-070912-634]
ENSDARG00000063218	ppm1la	593.092	-1.1565	0.258125	-4.48039	7.45057e-06	0.000315882	protein phosphatase, Mg2+/Mn2+ dependent, 1La [Source:ZFIN;Acc:ZDB-GENE-061103-118]
ENSDARG00000016154	zfp36l1a	1420.54	-1.15347	0.393208	-2.93348	0.00335186	0.0339734	zinc finger protein 36, C3H type-like 1a [Source:ZFIN;Acc:ZDB-GENE-030131-9860]
ENSDARG00000014587	slc38a5b	681.883	-1.14514	0.306925	-3.73101	0.000190715	0.00400954	solute carrier family 38 member 5b [Source:ZFIN;Acc:ZDB-GENE-040718-395]
ENSDARG00000040623	fosl2	722.179	-1.14094	0.387598	-2.94362	0.00324399	0.0331935	fos-like antigen 2 [Source:ZFIN;Acc:ZDB-GENE-070209-164]
ENSDARG00000079756	peak1	255.084	-1.13648	0.300092	-3.78712	0.000152404	0.00337456	pseudopodium-enriched atypical kinase 1 [Source:ZFIN;Acc:ZDB-GENE-100422-1]
ENSDARG00000091003	il34	133.734	-1.13548	0.360894	-3.14629	0.00165355	0.0202241	interleukin 34 [Source:ZFIN;Acc:ZDB-GENE-050419-150]
ENSDARG00000079839	arrdc1b	155.566	-1.13311	0.308829	-3.66905	0.000243449	0.00478929	arrestin domain containing 1b [Source:ZFIN;Acc:ZDB-GENE-080515-2]
ENSDARG00000074561	slc47a3	324.752	-1.13291	0.330503	-3.42783	0.00060843	0.00941404	solute carrier family 47 member 3 [Source:ZFIN;Acc:ZDB-GENE-130530-755]
ENSDARG00000086789	bahd1	590.389	-1.12888	0.364226	-3.0994	0.00193914	0.0227436	bromo adjacent homology domain containing 1 [Source:ZFIN;Acc:ZDB-GENE-120411-42]
ENSDARG00000000161	itsn2a	114.332	-1.1217	0.402597	-2.78616	0.00533365	0.0471474	intersectin 2a [Source:ZFIN;Acc:ZDB-GENE-041014-84]
ENSDARG00000005823	slc39a10	416.255	-1.12166	0.296454	-3.78358	0.000154586	0.00341176	solute carrier family 39 member 10 [Source:NCBI gene;Acc:393644]
ENSDARG00000037196	arid5b	257.884	-1.12141	0.376224	-2.9807	0.00287587	0.0303089	AT-rich interaction domain 5B [Source:NCBI gene;Acc:100536827]
ENSDARG00000045519	sfmbt2	128.157	-1.11983	0.307329	-3.64376	0.000268684	0.00515453	Scm like with four mbt domains 2 [Source:ZFIN;Acc:ZDB-GENE-041210-196]
ENSDARG00000045528	fgd6	232.308	-1.1185	0.356925	-3.13371	0.00172613	0.020835	FYVE, RhoGEF and PH domain containing 6 [Source:ZFIN;Acc:ZDB-GENE-041210-200]
ENSDARG00000078676	myrf	300.22	-1.11785	0.394245	-2.83543	0.00457643	0.0423252	myelin regulatory factor [Source:ZFIN;Acc:ZDB-GENE-080204-57]
ENSDARG00000033042	ptprja	206.806	-1.11783	0.295477	-3.78314	0.000154864	0.00341421	protein tyrosine phosphatase receptor type Ja [Source:ZFIN;Acc:ZDB-GENE-030131-8301]
ENSDARG00000000767	spi1b	365.033	-1.11708	0.275221	-4.05884	4.93175e-05	0.00141453	Spi-1 proto-oncogene b [Source:ZFIN;Acc:ZDB-GENE-980526-164]
ENSDARG00000002305	me3	1452.84	-1.11577	0.345891	-3.22578	0.0012563	0.0164018	malic enzyme 3, NADP(+)-dependent, mitochondrial [Source:ZFIN;Acc:ZDB-GENE-041111-294]
ENSDARG00000021059	alas1	3422.47	-1.11403	0.347321	-3.20749	0.001339	0.0171845	aminolevulinate, delta-, synthase 1 [Source:ZFIN;Acc:ZDB-GENE-001229-2]
ENSDARG00000009133	myo1eb	460.488	-1.11375	0.385371	-2.89006	0.00385163	0.0373852	myosin IEb [Source:ZFIN;Acc:ZDB-GENE-040426-1347]
ENSDARG00000002365	cers5	333.172	-1.10973	0.251036	-4.42059	9.84312e-06	0.000387511	ceramide synthase 5 [Source:ZFIN;Acc:ZDB-GENE-030131-1740]
ENSDARG00000018263	pdia2	466.192	-1.10865	0.381514	-2.90593	0.00366169	0.0361172	protein disulfide isomerase family A, member 2 [Source:ZFIN;Acc:ZDB-GENE-040426-705]
ENSDARG00000038754	plk3	967.237	-1.10666	0.390216	-2.83603	0.00456786	0.0423035	polo-like kinase 3 (Drosophila) [Source:ZFIN;Acc:ZDB-GENE-030131-6134]
ENSDARG00000022187	usp6nl	348.378	-1.10639	0.321677	-3.43943	0.000582936	0.00915152	USP6 N-terminal like [Source:ZFIN;Acc:ZDB-GENE-041210-192]
ENSDARG00000100374	txnrd3	3612.88	-1.10628	0.263907	-4.19192	2.76604e-05	0.00089112	thioredoxin reductase 3 [Source:ZFIN;Acc:ZDB-GENE-030327-3]
ENSDARG00000056200	abcb9	302.587	-1.10156	0.342034	-3.22061	0.00127919	0.0166581	ATP-binding cassette, sub-family B (MDR/TAP), member 9 [Source:ZFIN;Acc:ZDB-GENE-050517-12]
ENSDARG00000062485	dock11	252.017	-1.09922	0.288791	-3.80629	0.000141067	0.00318227	dedicator of cytokinesis 11 [Source:ZFIN;Acc:ZDB-GENE-060503-196]
ENSDARG00000058830	zdhhc3b	263.193	-1.09729	0.286692	-3.82741	0.000129497	0.00297726	zinc finger DHHC-type containing 3b [Source:ZFIN;Acc:ZDB-GENE-061110-19]
ENSDARG00000102565	vasnb	111.178	-1.09529	0.315796	-3.46834	0.00052368	0.00843175	vasorin b [Source:ZFIN;Acc:ZDB-GENE-110714-1]
ENSDARG00000016551	iqsec1b	705.323	-1.09448	0.332091	-3.29574	0.000981644	0.0136181	IQ motif and Sec7 domain ArfGEF 1b [Source:ZFIN;Acc:ZDB-GENE-120813-1]
ENSDARG00000112644	CU459056.1	1115.83	-1.0937	0.304432	-3.59258	0.000327414	0.00595992	ST6 (alpha-N-acetyl-neuraminyl-2,3-beta-galactosyl-1,3)-N-acetylgalactosaminide alpha-2,6-sialyltransferase [Source:NCBI gene;Acc:407706]
ENSDARG00000073721	smarcad1b	110.178	-1.08822	0.334752	-3.25082	0.00115073	0.0153478	Danio rerio SWI/SNF-related, matrix-associated actin-dependent regulator of chromatin, subfamily a, containing DEAD/H box 1 b (smarcad1b), mRNA. [Source:RefSeq mRNA;Acc:NM_001353868]
ENSDARG00000034293	hif1ab	2953.21	-1.08768	0.289645	-3.75524	0.000173178	0.00369804	hypoxia inducible factor 1 subunit alpha b [Source:ZFIN;Acc:ZDB-GENE-040426-706]
ENSDARG00000040812	ncf4	125.918	-1.08737	0.346879	-3.13472	0.00172019	0.0208066	neutrophil cytosolic factor 4 [Source:ZFIN;Acc:ZDB-GENE-041124-1]
ENSDARG00000028731	stat4	381.994	-1.0866	0.344441	-3.15467	0.0016068	0.0198711	signal transducer and activator of transcription 4 [Source:ZFIN;Acc:ZDB-GENE-030616-264]
ENSDARG00000067797	spi1a	234.894	-1.08231	0.263408	-4.10886	3.97611e-05	0.00119069	Spi-1 proto-oncogene a [Source:ZFIN;Acc:ZDB-GENE-060825-351]
ENSDARG00000020625	jak1	3050.04	-1.07249	0.170122	-6.30428	2.89545e-10	7.47429e-08	Janus kinase 1 [Source:NCBI gene;Acc:30280]
ENSDARG00000055092	pora	595.301	-1.07083	0.319465	-3.35194	0.000802483	0.0116394	P450 (cytochrome) oxidoreductase a [Source:ZFIN;Acc:ZDB-GENE-050809-121]
ENSDARG00000055917	nipa1	215.71	-1.07043	0.339629	-3.15175	0.00162297	0.0200104	NIPA magnesium transporter 1 [Source:ZFIN;Acc:ZDB-GENE-041010-164]
ENSDARG00000053467	gtpbp1	738.087	-1.06339	0.187035	-5.68553	1.30411e-08	1.87145e-06	GTP binding protein 1 [Source:ZFIN;Acc:ZDB-GENE-030909-12]
ENSDARG00000088877	smarcd2	389.288	-1.06023	0.173373	-6.11532	9.6365e-10	2.13606e-07	SWI/SNF related, matrix associated, actin dependent regulator of chromatin, subfamily d, member 2 [Source:ZFIN;Acc:ZDB-GENE-080215-1]
ENSDARG00000060123	ca16b	381.57	-1.05757	0.375337	-2.81767	0.00483742	0.0441887	carbonic anhydrase XVI b [Source:ZFIN;Acc:ZDB-GENE-080818-1]
ENSDARG00000098853	ehd1a	1383.46	-1.05437	0.344634	-3.05939	0.00221787	0.0250576	EH-domain containing 1a [Source:ZFIN;Acc:ZDB-GENE-040426-2518]
ENSDARG00000036282	rnaset2	793.474	-1.05413	0.241157	-4.37114	1.23599e-05	0.000466769	ribonuclease T2 [Source:NCBI gene;Acc:791890]
ENSDARG00000068438	gucd1	371.849	-1.05318	0.241431	-4.36223	1.28746e-05	0.000481746	guanylyl cyclase domain containing 1 [Source:ZFIN;Acc:ZDB-GENE-060929-872]
ENSDARG00000025076	marveld2a	232.106	-1.05033	0.266036	-3.94809	7.8776e-05	0.0020472	MARVEL domain containing 2a [Source:ZFIN;Acc:ZDB-GENE-050411-59]
ENSDARG00000102403	cry2	645.905	-1.04891	0.211885	-4.95038	7.40689e-07	5.1203e-05	cryptochrome circadian regulator 2 [Source:ZFIN;Acc:ZDB-GENE-010426-6]
ENSDARG00000102441	ctnna1	1536.73	-1.04796	0.217064	-4.82788	1.37991e-06	8.60567e-05	catenin (cadherin-associated protein), alpha 1 [Source:ZFIN;Acc:ZDB-GENE-991207-24]
ENSDARG00000057125	pld1b	960.055	-1.04769	0.33422	-3.13473	0.00172013	0.0208066	phospholipase D1b [Source:ZFIN;Acc:ZDB-GENE-070510-3]
ENSDARG00000075592	tnfaip8l2a	212.261	-1.04335	0.358557	-2.90985	0.00361606	0.035832	tumor necrosis factor, alpha-induced protein 8-like 2a [Source:NCBI gene;Acc:723996]
ENSDARG00000000151	thraa	143.196	-1.04131	0.309535	-3.36412	0.00076789	0.011274	thyroid hormone receptor alpha a [Source:NCBI gene;Acc:30670]
ENSDARG00000073869	pdzrn3b	111.25	-1.0404	0.288899	-3.60128	0.000316657	0.00582288	PDZ domain containing RING finger 3b [Source:NCBI gene;Acc:100005518]
ENSDARG00000061591	abcb10	190.573	-1.03873	0.253112	-4.10386	4.06321e-05	0.00121319	ATP-binding cassette, sub-family B (MDR/TAP), member 10 [Source:ZFIN;Acc:ZDB-GENE-040525-2]
ENSDARG00000033666	pi4k2a	501.437	-1.03847	0.288086	-3.60473	0.000312472	0.00576673	phosphatidylinositol 4-kinase type 2 alpha [Source:NCBI gene;Acc:406667]
ENSDARG00000100534	irak4	215.741	-1.03787	0.215683	-4.81203	1.49406e-06	9.28914e-05	interleukin-1 receptor-associated kinase 4 [Source:ZFIN;Acc:ZDB-GENE-040426-738]
ENSDARG00000002745	tdh	4427.57	-1.03533	0.314838	-3.28844	0.00100743	0.0138721	L-threonine dehydrogenase [Source:ZFIN;Acc:ZDB-GENE-040426-2379]
ENSDARG00000034262	pld2	341.969	-1.03098	0.27034	-3.81363	0.000136941	0.00310119	phospholipase D2 [Source:ZFIN;Acc:ZDB-GENE-060216-4]
ENSDARG00000011665	aldoaa	9734.17	-1.02775	0.294536	-3.4894	0.000484114	0.00792437	aldolase a, fructose-bisphosphate, a [Source:ZFIN;Acc:ZDB-GENE-030131-8369]
ENSDARG00000058038	eml3	504.178	-1.02727	0.22365	-4.59321	4.36476e-06	0.000210925	EMAP like 3 [Source:ZFIN;Acc:ZDB-GENE-110304-3]
ENSDARG00000041736	hsdl1	70.3735	-1.0256	0.320548	-3.19952	0.00137655	0.017567	hydroxysteroid dehydrogenase like 1 [Source:NCBI gene;Acc:494064]
ENSDARG00000098386	ctps1b	383.503	-1.02535	0.328208	-3.1241	0.00178353	0.0212948	CTP synthase 1b [Source:ZFIN;Acc:ZDB-GENE-040801-160]
ENSDARG00000008100	slc7a10a	295.093	-1.02364	0.325819	-3.14174	0.0016795	0.0204559	solute carrier family 7 member 10a [Source:ZFIN;Acc:ZDB-GENE-080116-1]
ENSDARG00000105177	ilf3b	2092.95	-1.02243	0.157676	-6.48436	8.91089e-11	2.73439e-08	interleukin enhancer binding factor 3b [Source:NCBI gene;Acc:321868]
ENSDARG00000061941	trpv4	151.766	-1.02157	0.337831	-3.02389	0.00249543	0.0273819	transient receptor potential cation channel, subfamily V, member 4 [Source:ZFIN;Acc:ZDB-GENE-030912-7]
ENSDARG00000104508	slc10a7	199.896	-1.02137	0.247811	-4.12156	3.76322e-05	0.00114201	solute carrier family 10 member 7 [Source:NCBI gene;Acc:445025]
ENSDARG00000045150	csnk1e	783.601	-1.02069	0.363779	-2.8058	0.00501916	0.0451668	casein kinase 1, epsilon [Source:ZFIN;Acc:ZDB-GENE-030131-7873]
ENSDARG00000010155	abi1a	1227.95	-1.01985	0.26391	-3.86439	0.000111367	0.00264389	abl-interactor 1a [Source:ZFIN;Acc:ZDB-GENE-040426-1701]
ENSDARG00000061579	myo1cb	1598.63	-1.01672	0.243529	-4.17494	2.98063e-05	0.00094827	myosin Ic, paralog b [Source:ZFIN;Acc:ZDB-GENE-090429-3]
ENSDARG00000052859	chp1	872.067	-1.00375	0.245601	-4.08691	4.37156e-05	0.00129122	calcineurin-like EF-hand protein 1 [Source:ZFIN;Acc:ZDB-GENE-030131-4086]
ENSDARG00000024195	znf395b	286.757	-1.00258	0.331993	-3.01988	0.00252876	0.0276424	zinc finger protein 395b [Source:ZFIN;Acc:ZDB-GENE-041001-193]
ENSDARG00000021521	rgs14a	50.9301	-0.999268	0.348698	-2.86571	0.00416075	0.0394102	regulator of G protein signaling 14a [Source:ZFIN;Acc:ZDB-GENE-030131-5579]
ENSDARG00000071084	wipf1b	387.789	-0.998962	0.306194	-3.26251	0.00110429	0.0148548	WAS/WASL interacting protein family, member 1b [Source:ZFIN;Acc:ZDB-GENE-110815-1]
ENSDARG00000055276	rel	302.684	-0.997135	0.316873	-3.1468	0.00165068	0.0202241	v-rel avian reticuloendotheliosis viral oncogene homolog [Source:ZFIN;Acc:ZDB-GENE-040718-255]
ENSDARG00000018303	etv4	88.9891	-0.995873	0.331377	-3.00526	0.00265356	0.0287279	ETS variant transcription factor 4 [Source:NCBI gene;Acc:30700]
ENSDARG00000104045	tlr22	62.8687	-0.993453	0.352626	-2.8173	0.00484292	0.0441887	toll-like receptor 22 [Source:ZFIN;Acc:ZDB-GENE-040220-5]
ENSDARG00000002285	mcoln1a	236.344	-0.992729	0.275318	-3.60575	0.000311253	0.00575786	mucolipin 1a [Source:ZFIN;Acc:ZDB-GENE-040426-2704]
ENSDARG00000091418	snx17	868.484	-0.991801	0.254454	-3.89776	9.70852e-05	0.00238694	sorting nexin 17 [Source:NCBI gene;Acc:568263]
ENSDARG00000060683	lrsam1	196.338	-0.989321	0.247733	-3.99349	6.51076e-05	0.0017518	leucine rich repeat and sterile alpha motif containing 1 [Source:ZFIN;Acc:ZDB-GENE-060526-97]
ENSDARG00000101127	map1lc3b	1904.98	-0.98919	0.347413	-2.8473	0.00440921	0.0411708	microtubule-associated protein 1 light chain 3 beta [Source:ZFIN;Acc:ZDB-GENE-030131-1145]
ENSDARG00000041217	xpo6	816.652	-0.988948	0.279659	-3.53626	0.000405829	0.006981	exportin 6 [Source:NCBI gene;Acc:333980]
ENSDARG00000012499	per1b	1095.92	-0.988828	0.245608	-4.02604	5.67239e-05	0.0015883	period circadian clock 1b [Source:ZFIN;Acc:ZDB-GENE-040419-1]
ENSDARG00000104103	rps6kc1	537.36	-0.982744	0.31745	-3.09575	0.00196317	0.0229559	ribosomal protein S6 kinase polypeptide 1 [Source:ZFIN;Acc:ZDB-GENE-081031-83]
ENSDARG00000029045	peli2	211.531	-0.982451	0.217226	-4.52272	6.10489e-06	0.00027362	pellino E3 ubiquitin protein ligase family member 2 [Source:ZFIN;Acc:ZDB-GENE-040718-360]
ENSDARG00000027589	fzd7b	320.755	-0.98233	0.249147	-3.94278	8.05429e-05	0.00208176	frizzled class receptor 7b [Source:ZFIN;Acc:ZDB-GENE-990415-229]
ENSDARG00000040571	ube4a	426.867	-0.980968	0.343689	-2.85423	0.00431413	0.0405024	ubiquitination factor E4A (UFD2 homolog, yeast) [Source:ZFIN;Acc:ZDB-GENE-070410-21]
ENSDARG00000052150	pbx4	577.956	-0.977784	0.212557	-4.60011	4.22278e-06	0.000205036	pre-B-cell leukemia transcription factor 4 [Source:ZFIN;Acc:ZDB-GENE-000201-18]
ENSDARG00000040482	osbpl3b	125.674	-0.977618	0.325296	-3.00532	0.00265305	0.0287279	oxysterol binding protein-like 3b [Source:ZFIN;Acc:ZDB-GENE-090109-1]
ENSDARG00000044694	fybb	382.124	-0.972119	0.234045	-4.15356	3.27338e-05	0.0010207	FYN binding protein b [Source:ZFIN;Acc:ZDB-GENE-091204-85]
ENSDARG00000060596	prkaa1	803.102	-0.971992	0.228825	-4.24775	2.15928e-05	0.000726636	protein kinase, AMP-activated, alpha 1 catalytic subunit [Source:ZFIN;Acc:ZDB-GENE-030325-1]
ENSDARG00000102908	il16	412.528	-0.971967	0.291829	-3.3306	0.000866589	0.0123501	interleukin 16 [Source:ZFIN;Acc:ZDB-GENE-130103-3]
ENSDARG00000017311	gpsm2	231.064	-0.971493	0.271747	-3.57499	0.000350242	0.00625437	G protein signaling modulator 2 [Source:ZFIN;Acc:ZDB-GENE-040426-1169]
ENSDARG00000092488	khnyn	589.869	-0.969726	0.238159	-4.07176	4.66587e-05	0.00136091	KH and NYN domain containing [Source:ZFIN;Acc:ZDB-GENE-141215-64]
ENSDARG00000037919	rbbp6	1217.47	-0.969674	0.167227	-5.79854	6.68955e-09	1.10016e-06	retinoblastoma binding protein 6 [Source:ZFIN;Acc:ZDB-GENE-040930-5]
ENSDARG00000045733	ciapin1	616.997	-0.969252	0.289304	-3.35029	0.000807271	0.0116839	cytokine induced apoptosis inhibitor 1 [Source:NCBI gene;Acc:445283]
ENSDARG00000001910	rorab	905.655	-0.969243	0.330255	-2.93483	0.00333726	0.0338591	RAR-related orphan receptor A, paralog b [Source:NCBI gene;Acc:554722]
ENSDARG00000005463	slc30a1a	626.94	-0.967145	0.297364	-3.25239	0.0011444	0.0152733	solute carrier family 30 member 1a [Source:ZFIN;Acc:ZDB-GENE-040426-1840]
ENSDARG00000053995	gpank1	83.347	-0.966324	0.329588	-2.93192	0.00336875	0.034043	G patch domain and ankyrin repeats 1 [Source:ZFIN;Acc:ZDB-GENE-070928-32]
ENSDARG00000002758	dedd1	1356.24	-0.965965	0.208735	-4.6277	3.69749e-06	0.000183933	death effector domain-containing 1 [Source:ZFIN;Acc:ZDB-GENE-000616-2]
ENSDARG00000056268	atxn7l2b	131.03	-0.965286	0.2825	-3.41694	0.000633293	0.00972496	ataxin 7-like 2b [Source:ZFIN;Acc:ZDB-GENE-040718-403]
ENSDARG00000058990	slc35a2	71.9036	-0.961518	0.27427	-3.50573	0.000455352	0.00756188	solute carrier family 35 member 2 [Source:ZFIN;Acc:ZDB-GENE-030616-62]
ENSDARG00000098544	ncdn	309.136	-0.959388	0.240581	-3.9878	6.66892e-05	0.00178477	neurochondrin [Source:ZFIN;Acc:ZDB-GENE-061220-6]
ENSDARG00000059606	ccdc84	134.532	-0.958066	0.226042	-4.23845	2.2507e-05	0.000747534	coiled-coil domain containing 84 [Source:ZFIN;Acc:ZDB-GENE-060929-1174]
ENSDARG00000009881	ier5	790.322	-0.951908	0.324592	-2.93263	0.00336106	0.0340162	immediate early response 5 [Source:ZFIN;Acc:ZDB-GENE-030616-127]
ENSDARG00000068182	crb3b	328.184	-0.950067	0.24394	-3.89468	9.83285e-05	0.00241301	crumbs homolog 3b [Source:ZFIN;Acc:ZDB-GENE-060610-3]
ENSDARG00000037746	actb1	27164.7	-0.949554	0.304817	-3.11516	0.00183847	0.0218357	actin, beta 1 [Source:NCBI gene;Acc:57934]
ENSDARG00000042270	arsa	212.389	-0.949239	0.326746	-2.90512	0.00367107	0.0361488	arylsulfatase A [Source:ZFIN;Acc:ZDB-GENE-050320-118]
ENSDARG00000099235	hook2	167.373	-0.948385	0.226851	-4.18065	2.90681e-05	0.000929131	hook microtubule-tethering protein 2 [Source:ZFIN;Acc:ZDB-GENE-040426-1636]
ENSDARG00000010445	trabd	1017.43	-0.947786	0.289183	-3.27747	0.00104743	0.0142974	TraB domain containing [Source:ZFIN;Acc:ZDB-GENE-030131-1301]
ENSDARG00000005416	map3k5	639.155	-0.94513	0.213546	-4.42589	9.60449e-06	0.000379582	mitogen-activated protein kinase kinase kinase 5 [Source:ZFIN;Acc:ZDB-GENE-030827-3]
ENSDARG00000068995	h2ax1	1893.57	-0.943468	0.278964	-3.38205	0.000719476	0.0107229	H2A.X variant histone family member 1 [Source:ZFIN;Acc:ZDB-GENE-041010-42]
ENSDARG00000012040	rnf19a	1315.06	-0.939155	0.191896	-4.89409	9.87595e-07	6.43451e-05	ring finger protein 19A, RBR E3 ubiquitin protein ligase [Source:ZFIN;Acc:ZDB-GENE-030131-9414]
ENSDARG00000042722	blnk	117.955	-0.938227	0.338301	-2.77334	0.00554833	0.0486235	B cell linker [Source:ZFIN;Acc:ZDB-GENE-040702-4]
ENSDARG00000076622	atp13a3	192.835	-0.937215	0.249219	-3.76061	0.000169498	0.00364616	ATPase 13A3 [Source:ZFIN;Acc:ZDB-GENE-120521-1]
ENSDARG00000089787	crebzf	764.575	-0.936727	0.184267	-5.08353	3.70485e-07	2.97453e-05	CREB/ATF bZIP transcription factor [Source:ZFIN;Acc:ZDB-GENE-030131-8015]
ENSDARG00000062178	ripor1	508.932	-0.936597	0.262996	-3.56126	0.000369079	0.00649968	RHO family interacting cell polarization regulator 1 [Source:ZFIN;Acc:ZDB-GENE-050420-32]
ENSDARG00000079900	shroom4	254.06	-0.93624	0.307495	-3.04473	0.00232887	0.0260415	shroom family member 4 [Source:ZFIN;Acc:ZDB-GENE-041111-246]
ENSDARG00000063295	myh9a	2524.89	-0.935984	0.290711	-3.21964	0.00128353	0.0166816	myosin, heavy chain 9a, non-muscle [Source:ZFIN;Acc:ZDB-GENE-030131-5870]
ENSDARG00000044339	rp2	367.138	-0.933616	0.214939	-4.34363	1.40144e-05	0.000514023	RP2 activator of ARL3 GTPase [Source:NCBI gene;Acc:406755]
ENSDARG00000057767	nudt4a	526.855	-0.933404	0.336786	-2.77151	0.00557977	0.0487898	nudix (nucleoside diphosphate linked moiety X)-type motif 4a [Source:ZFIN;Acc:ZDB-GENE-031010-33]
ENSDARG00000038557	anks3	114.556	-0.92951	0.306126	-3.03637	0.00239447	0.0265961	ankyrin repeat and sterile alpha motif domain containing 3 [Source:ZFIN;Acc:ZDB-GENE-080204-51]
ENSDARG00000068227	tmem150aa	92.5779	-0.929259	0.25485	-3.6463	0.000266048	0.0051184	transmembrane protein 150Aa [Source:ZFIN;Acc:ZDB-GENE-060825-321]
ENSDARG00000078095	cipcb	717.042	-0.927636	0.227169	-4.08346	4.43708e-05	0.00130701	CLOCK-interacting pacemaker b [Source:ZFIN;Acc:ZDB-GENE-091204-292]
ENSDARG00000039452	hk1	1186.59	-0.924999	0.286853	-3.22464	0.00126129	0.0164474	hexokinase 1 [Source:ZFIN;Acc:ZDB-GENE-040426-2848]
ENSDARG00000052386	cldnd1b	148.699	-0.924475	0.285083	-3.24282	0.00118351	0.0156485	claudin domain containing 1b [Source:ZFIN;Acc:ZDB-GENE-040808-4]
ENSDARG00000039521	ssx2ipa	223.846	-0.922278	0.276226	-3.33885	0.000841245	0.0120728	synovial sarcoma, X breakpoint 2 interacting protein a [Source:ZFIN;Acc:ZDB-GENE-040426-1756]
ENSDARG00000041565	tnfaip1	195.114	-0.92164	0.321086	-2.87039	0.0040997	0.0390496	tumor necrosis factor, alpha-induced protein 1 (endothelial) [Source:ZFIN;Acc:ZDB-GENE-030131-5610]
ENSDARG00000074121	dnmbp	532.314	-0.920972	0.21148	-4.35488	1.3314e-05	0.000494559	dynamin binding protein [Source:NCBI gene;Acc:100005174]
ENSDARG00000068192	taf4a	172.14	-0.91847	0.172051	-5.33836	9.37895e-08	9.91009e-06	TAF4A RNA polymerase II, TATA box binding protein (TBP)-associated factor [Source:ZFIN;Acc:ZDB-GENE-131127-579]
ENSDARG00000098646	mthfd2	386.859	-0.918243	0.324726	-2.82775	0.00468763	0.0431969	methylenetetrahydrofolate dehydrogenase (NADP+ dependent) 2, methenyltetrahydrofolate cyclohydrolase [Source:ZFIN;Acc:ZDB-GENE-040704-20]
ENSDARG00000020326	tyk2	793.829	-0.914694	0.214943	-4.25552	2.08565e-05	0.000704184	tyrosine kinase 2 [Source:ZFIN;Acc:ZDB-GENE-071116-4]
ENSDARG00000101116	vps33a	270.975	-0.914659	0.29592	-3.0909	0.0019955	0.0231876	VPS33A core subunit of CORVET and HOPS complexes [Source:ZFIN;Acc:ZDB-GENE-040914-82]
ENSDARG00000075110	dab2ipb	327.279	-0.913582	0.317581	-2.87669	0.00401866	0.0385714	DAB2 interacting protein b [Source:ZFIN;Acc:ZDB-GENE-030131-2449]
ENSDARG00000010255	bin2b	196.88	-0.913418	0.317653	-2.87552	0.00403365	0.0385899	bridging integrator 2b [Source:ZFIN;Acc:ZDB-GENE-030131-5598]
ENSDARG00000062049	arhgap45b	456.222	-0.913383	0.328186	-2.78313	0.00538373	0.0474986	Rho GTPase activating protein 45b [Source:ZFIN;Acc:ZDB-GENE-071213-2]
ENSDARG00000060306	tfcp2	634.862	-0.910537	0.205548	-4.4298	9.43207e-06	0.000375508	transcription factor CP2 [Source:ZFIN;Acc:ZDB-GENE-030131-2523]
ENSDARG00000040334	mat2aa	2222.39	-0.908579	0.268654	-3.38197	0.000719686	0.0107229	methionine adenosyltransferase II, alpha a [Source:ZFIN;Acc:ZDB-GENE-030131-2049]
ENSDARG00000034146	ccnk	199.457	-0.905789	0.321304	-2.8191	0.00481579	0.0441188	cyclin K [Source:NCBI gene;Acc:569432]
ENSDARG00000044417	disp1	115.138	-0.903076	0.283986	-3.18	0.00147273	0.0185879	dispatched homolog 1 (Drosophila) [Source:NCBI gene;Acc:619201]
ENSDARG00000007412	slc2a1b	342.733	-0.89403	0.282711	-3.16235	0.00156501	0.0194249	solute carrier family 2 member 1b [Source:ZFIN;Acc:ZDB-GENE-090915-1]
ENSDARG00000044619	birc2	1769.71	-0.891602	0.232164	-3.8404	0.000122833	0.00285626	baculoviral IAP repeat containing 2 [Source:ZFIN;Acc:ZDB-GENE-030825-6]
ENSDARG00000037244	gpr137	178.388	-0.890409	0.236719	-3.76146	0.000168925	0.00364153	G protein-coupled receptor 137 [Source:ZFIN;Acc:ZDB-GENE-040718-443]
ENSDARG00000011770	dhrs12	298.973	-0.887646	0.255912	-3.46856	0.000523252	0.00843175	dehydrogenase/reductase (SDR family) member 12 [Source:ZFIN;Acc:ZDB-GENE-060929-1134]
ENSDARG00000096662	abcc3	382.939	-0.88699	0.2078	-4.26849	1.96802e-05	0.000676794	ATP-binding cassette, sub-family C (CFTR/MRP), member 3 [Source:ZFIN;Acc:ZDB-GENE-050517-16]
ENSDARG00000012407	mgat1a	710.331	-0.886284	0.26228	-3.37915	0.0007271	0.0108074	alpha-1,3-mannosyl-glycoprotein 2-beta-N-acetylglucosaminyltransferase a [Source:ZFIN;Acc:ZDB-GENE-040426-1515]
ENSDARG00000021975	ginm1	1726.72	-0.883231	0.200573	-4.40355	1.06495e-05	0.000416043	glycoprotein integral membrane 1 [Source:NCBI gene;Acc:555775]
ENSDARG00000069543	galt	152.448	-0.882822	0.22383	-3.94417	8.00767e-05	0.00207497	galactose-1-phosphate uridylyltransferase [Source:ZFIN;Acc:ZDB-GENE-070112-172]
ENSDARG00000098696	rela	165.9	-0.878845	0.304176	-2.88927	0.00386143	0.0374269	v-rel avian reticuloendotheliosis viral oncogene homolog A [Source:ZFIN;Acc:ZDB-GENE-040825-4]
ENSDARG00000062664	oxnad1	203.104	-0.875037	0.311868	-2.80579	0.00501932	0.0451668	oxidoreductase NAD-binding domain containing 1 [Source:NCBI gene;Acc:558500]
ENSDARG00000076566	kank3	195.716	-0.874804	0.313198	-2.79313	0.00522003	0.0465059	KN motif and ankyrin repeat domains 3 [Source:ZFIN;Acc:ZDB-GENE-081105-185]
ENSDARG00000104306	UBR1	465.736	-0.873528	0.241136	-3.62255	0.000291712	0.0054689	ubiquitin protein ligase E3 component n-recognin 1 [Source:NCBI gene;Acc:568531]
ENSDARG00000043561	psmc1b	1181.49	-0.870408	0.280962	-3.09796	0.00194858	0.0228113	proteasome 26S subunit, ATPase 1b [Source:ZFIN;Acc:ZDB-GENE-040625-69]
ENSDARG00000099774	cyb5b	1130.78	-0.87013	0.195641	-4.44758	8.68449e-06	0.000352795	cytochrome b5 type B [Source:ZFIN;Acc:ZDB-GENE-040426-2614]
ENSDARG00000019484	zdhhc7	102.119	-0.870104	0.235204	-3.69936	0.000216144	0.00438154	zinc finger DHHC-type containing 7 [Source:ZFIN;Acc:ZDB-GENE-040718-346]
ENSDARG00000044380	rbmx2	112.268	-0.870001	0.229459	-3.79152	0.000149726	0.00333337	RNA binding motif protein X-linked 2 [Source:ZFIN;Acc:ZDB-GENE-050626-88]
ENSDARG00000059712	slc19a2	51.516	-0.869439	0.314922	-2.76081	0.00576585	0.0499079	solute carrier family 19 member 2 [Source:ZFIN;Acc:ZDB-GENE-110411-262]
ENSDARG00000093043	ugt2a7	172.006	-0.86931	0.211067	-4.11864	3.81108e-05	0.00115478	UDP glucuronosyltransferase 2 family, polypeptide A7 [Source:ZFIN;Acc:ZDB-GENE-141215-33]
ENSDARG00000075851	oafa	321.902	-0.869147	0.21824	-3.98253	6.81852e-05	0.00182003	OAF homolog a (Drosophila) [Source:ZFIN;Acc:ZDB-GENE-090917-1]
ENSDARG00000023532	pinx1	381.508	-0.868574	0.248836	-3.49054	0.000482036	0.00791479	PIN2 (TERF1) interacting telomerase inhibitor 1 [Source:ZFIN;Acc:ZDB-GENE-030515-2]
ENSDARG00000099545	snx25	486.932	-0.867786	0.223091	-3.88984	0.000100312	0.00244697	sorting nexin 25 [Source:ZFIN;Acc:ZDB-GENE-121105-11]
ENSDARG00000055607	cgna	415.238	-0.867643	0.23845	-3.63869	0.000274033	0.00521584	cingulin a [Source:ZFIN;Acc:ZDB-GENE-100921-78]
ENSDARG00000038422	entpd4	421.948	-0.86693	0.235613	-3.67947	0.000233721	0.00464549	ectonucleoside triphosphate diphosphohydrolase 4 [Source:ZFIN;Acc:ZDB-GENE-040718-116]
ENSDARG00000056331	ahcyl1	1154.97	-0.865832	0.242282	-3.57366	0.000352031	0.00627532	adenosylhomocysteinase-like 1 [Source:ZFIN;Acc:ZDB-GENE-021206-7]
ENSDARG00000001857	aff4	594.579	-0.856507	0.258444	-3.31409	0.000919413	0.0129935	AF4/FMR2 family, member 4 [Source:ZFIN;Acc:ZDB-GENE-100910-5]
ENSDARG00000070470	sh3rf1	292.044	-0.846629	0.188175	-4.49915	6.82242e-06	0.000295392	SH3 domain containing ring finger 1 [Source:NCBI gene;Acc:556523]
ENSDARG00000036056	vrk3	125.393	-0.844925	0.290887	-2.90465	0.00367667	0.036172	VRK serine/threonine kinase 3 [Source:ZFIN;Acc:ZDB-GENE-030131-246]
ENSDARG00000089904	adgre5b.3	321.725	-0.844155	0.243114	-3.47226	0.000516092	0.00835291	adhesion G protein-coupled receptor E5b, duplicate 3 [Source:ZFIN;Acc:ZDB-GENE-121214-275]
ENSDARG00000036281	CC2D1A	192.356	-0.840925	0.260157	-3.23237	0.00122767	0.0161382	coiled-coil and C2 domain containing 1A [Source:NCBI gene;Acc:100001297]
ENSDARG00000055678	akap12b	1212.92	-0.840709	0.216291	-3.88694	0.000101517	0.0024734	A kinase (PRKA) anchor protein 12b [Source:ZFIN;Acc:ZDB-GENE-030131-9753]
ENSDARG00000017843	srsf1b	901.868	-0.836551	0.178696	-4.68142	2.84892e-06	0.000148209	serine and arginine rich splicing factor 1b [Source:NCBI gene;Acc:393565]
ENSDARG00000010956	sh3glb1b	476.089	-0.835326	0.242802	-3.44035	0.000580953	0.00912741	SH3-domain GRB2-like endophilin B1b [Source:ZFIN;Acc:ZDB-GENE-030131-6851]
ENSDARG00000040917	cbfb	366.937	-0.833269	0.287964	-2.89365	0.00380787	0.0371017	core-binding factor subunit beta [Source:ZFIN;Acc:ZDB-GENE-980526-440]
ENSDARG00000069808	ostm1	256.109	-0.832895	0.281131	-2.96266	0.00304998	0.0317338	osteoclastogenesis associated transmembrane protein 1 [Source:ZFIN;Acc:ZDB-GENE-081104-270]
ENSDARG00000057708	phtf1	826.423	-0.832727	0.268327	-3.1034	0.00191308	0.022525	putative homeodomain transcription factor 1 [Source:ZFIN;Acc:ZDB-GENE-080204-123]
ENSDARG00000006782	rb1	204	-0.831392	0.236279	-3.51869	0.000433677	0.00727899	retinoblastoma 1 [Source:ZFIN;Acc:ZDB-GENE-040428-1]
ENSDARG00000063677	ccny	145.228	-0.825102	0.287001	-2.87491	0.00404143	0.038639	cyclin Y [Source:ZFIN;Acc:ZDB-GENE-091117-45]
ENSDARG00000020467	safb	2491.61	-0.824926	0.139969	-5.89363	3.77805e-09	6.81822e-07	scaffold attachment factor B [Source:ZFIN;Acc:ZDB-GENE-030131-698]
ENSDARG00000061921	gltpa	368.118	-0.823808	0.282761	-2.91345	0.00357465	0.0355079	glycolipid transfer protein a [Source:NCBI gene;Acc:558007]
ENSDARG00000088307	mrtfba	169.371	-0.822711	0.293881	-2.79947	0.00511867	0.0457818	myocardin related transcription factor Ba [Source:ZFIN;Acc:ZDB-GENE-130531-36]
ENSDARG00000013542	lpgat1	1175.63	-0.822535	0.269241	-3.05502	0.00225047	0.0253417	lysophosphatidylglycerol acyltransferase 1 [Source:ZFIN;Acc:ZDB-GENE-030131-2906]
ENSDARG00000035990	cited4a	1346.28	-0.821036	0.218599	-3.7559	0.00017272	0.00369598	Cbp/p300-interacting transactivator, with Glu/Asp-rich carboxy-terminal domain, 4a [Source:ZFIN;Acc:ZDB-GENE-030131-7661]
ENSDARG00000032651	ppp1r10	846.403	-0.817179	0.274855	-2.97313	0.00294783	0.030844	protein phosphatase 1, regulatory subunit 10 [Source:ZFIN;Acc:ZDB-GENE-020419-15]
ENSDARG00000088318	ubap2a	1088.33	-0.81695	0.206927	-3.94801	7.8804e-05	0.0020472	ubiquitin associated protein 2a [Source:ZFIN;Acc:ZDB-GENE-070424-16]
ENSDARG00000104042	b4galt4	394.767	-0.816312	0.237627	-3.43526	0.000591976	0.00922244	UDP-Gal:betaGlcNAc beta 1,4- galactosyltransferase, polypeptide 4 [Source:ZFIN;Acc:ZDB-GENE-041114-103]
ENSDARG00000022000	traf3	166.582	-0.816286	0.292367	-2.79199	0.00523856	0.0465923	TNF receptor-associated factor 3 [Source:ZFIN;Acc:ZDB-GENE-040801-257]
ENSDARG00000006019	tktb	4077.05	-0.815729	0.206948	-3.94172	8.08999e-05	0.0020857	transketolase b [Source:ZFIN;Acc:ZDB-GENE-030909-13]
ENSDARG00000103735	elovl1b	1444.66	-0.813216	0.258954	-3.14038	0.00168728	0.0204935	ELOVL fatty acid elongase 1b [Source:ZFIN;Acc:ZDB-GENE-040426-2755]
ENSDARG00000051970	smu1b	285.235	-0.809038	0.271146	-2.98377	0.0028472	0.0301001	SMU1 DNA replication regulator and spliceosomal factor b [Source:ZFIN;Acc:ZDB-GENE-130530-635]
ENSDARG00000068784	vsir	534.603	-0.809011	0.240805	-3.35961	0.000780535	0.0114112	V-set immunoregulatory receptor [Source:ZFIN;Acc:ZDB-GENE-060929-716]
ENSDARG00000103813	ATE1	102.351	-0.804851	0.272829	-2.95002	0.00317757	0.0326943	arginyltransferase 1 [Source:NCBI gene;Acc:101886126]
ENSDARG00000020759	elf1	1147.1	-0.803484	0.276901	-2.90171	0.00371137	0.0364084	E74-like ETS transcription factor 1 [Source:ZFIN;Acc:ZDB-GENE-980526-335]
ENSDARG00000099936	nlrc3l	221.487	-0.802724	0.177178	-4.53062	5.88107e-06	0.000267707	NLR family, CARD domain containing 3-like [Source:ZFIN;Acc:ZDB-GENE-121214-346]
ENSDARG00000067796	clpxb	691.022	-0.801491	0.271265	-2.95464	0.00313037	0.0323523	caseinolytic mitochondrial matrix peptidase chaperone subunit b [Source:ZFIN;Acc:ZDB-GENE-130404-1]
ENSDARG00000078986	mplkip	112.833	-0.80129	0.184169	-4.35084	1.35619e-05	0.000500123	M-phase specific PLK1 interacting protein [Source:ZFIN;Acc:ZDB-GENE-070912-182]
ENSDARG00000056407	irf8	231.785	-0.798428	0.255962	-3.11933	0.00181264	0.0215792	interferon regulatory factor 8 [Source:ZFIN;Acc:ZDB-GENE-040718-367]
ENSDARG00000078392	chpfa	137.957	-0.797436	0.255576	-3.12016	0.00180755	0.0215312	chondroitin polymerizing factor a [Source:ZFIN;Acc:ZDB-GENE-100504-2]
ENSDARG00000099635	akap8l	2397.88	-0.795717	0.0849533	-9.36651	7.49679e-21	1.09202e-17	A kinase (PRKA) anchor protein 8-like [Source:ZFIN;Acc:ZDB-GENE-040426-2303]
ENSDARG00000002332	frmd6	213.104	-0.795361	0.272774	-2.91583	0.00354749	0.0353415	FERM domain containing 6 [Source:ZFIN;Acc:ZDB-GENE-050522-354]
ENSDARG00000020929	fam49ba	347.685	-0.795257	0.271592	-2.92813	0.00341004	0.0343752	family with sequence similarity 49 member Ba [Source:ZFIN;Acc:ZDB-GENE-030131-9537]
ENSDARG00000040087	epb41l4a	158.042	-0.793282	0.255678	-3.10266	0.00191791	0.0225689	erythrocyte membrane protein band 4.1 like 4A [Source:NCBI gene;Acc:30470]
ENSDARG00000061294	arhgap5	1066.87	-0.791688	0.169539	-4.66965	3.0172e-06	0.000155772	Rho GTPase activating protein 5 [Source:ZFIN;Acc:ZDB-GENE-081014-1]
ENSDARG00000002877	reps1	605.813	-0.791064	0.2463	-3.21179	0.00131909	0.0170255	RALBP1 associated Eps domain containing 1 [Source:ZFIN;Acc:ZDB-GENE-030131-9536]
ENSDARG00000041895	cad	1320.12	-0.788325	0.250093	-3.15213	0.00162083	0.0199961	carbamoyl-phosphate synthetase 2, aspartate transcarbamylase, and dihydroorotase [Source:ZFIN;Acc:ZDB-GENE-021030-4]
ENSDARG00000056600	papss2b	898.903	-0.787183	0.219132	-3.59228	0.000327795	0.00595992	3'-phosphoadenosine 5'-phosphosulfate synthase 2b [Source:ZFIN;Acc:ZDB-GENE-010323-5]
ENSDARG00000060184	pkn1a	375.111	-0.781407	0.226885	-3.44407	0.000573031	0.0090238	protein kinase N1a [Source:ZFIN;Acc:ZDB-GENE-061207-17]
ENSDARG00000088699	pdzd8	307.196	-0.781382	0.263965	-2.96018	0.00307461	0.0319249	PDZ domain containing 8 [Source:ZFIN;Acc:ZDB-GENE-110310-2]
ENSDARG00000076135	mmrn2a	248.882	-0.780752	0.260385	-2.99845	0.00271358	0.0291406	multimerin 2a [Source:ZFIN;Acc:ZDB-GENE-080424-3]
ENSDARG00000060978	atp2a3	1738.09	-0.77676	0.214602	-3.61954	0.000295122	0.00550633	ATPase sarcoplasmic/endoplasmic reticulum Ca2+ transporting 3 [Source:ZFIN;Acc:ZDB-GENE-060531-103]
ENSDARG00000011597	atxn2l	533.32	-0.775758	0.244028	-3.17897	0.001478	0.0186285	ataxin 2-like [Source:ZFIN;Acc:ZDB-GENE-030131-3246]
ENSDARG00000102887	abhd4	685.882	-0.775412	0.241203	-3.21477	0.00130549	0.0169142	abhydrolase domain containing 4 [Source:ZFIN;Acc:ZDB-GENE-050417-83]
ENSDARG00000062460	C24H8orf44	465.531	-0.773264	0.234778	-3.2936	0.000989121	0.0136846	serum/glucocorticoid regulated kinase family member 3 [Source:ZFIN;Acc:ZDB-GENE-070424-62]
ENSDARG00000041040	piga	98.2983	-0.77117	0.271725	-2.83805	0.00453897	0.0421508	phosphatidylinositol glycan anchor biosynthesis, class A [Source:ZFIN;Acc:ZDB-GENE-040426-1086]
ENSDARG00000015860	mtmr9	258.906	-0.770335	0.240017	-3.2095	0.00132965	0.0171184	myotubularin related protein 9 [Source:ZFIN;Acc:ZDB-GENE-040724-223]
ENSDARG00000008141	rbl1	152.692	-0.769603	0.215781	-3.56659	0.000361658	0.00639421	retinoblastoma-like 1 (p107) [Source:ZFIN;Acc:ZDB-GENE-030131-8179]
ENSDARG00000070448	grk4	653.342	-0.769344	0.231086	-3.32926	0.000870762	0.0123832	G protein-coupled receptor kinase 4 [Source:ZFIN;Acc:ZDB-GENE-060929-1198]
ENSDARG00000109830	SFMBT1	473.965	-0.769267	0.219307	-3.50771	0.000451974	0.00753063	Scm like with four mbt domains 1 [Source:NCBI gene;Acc:100001629]
ENSDARG00000078888	iqgap1	1065.56	-0.766717	0.233504	-3.28353	0.00102516	0.0140687	IQ motif containing GTPase activating protein 1 [Source:ZFIN;Acc:ZDB-GENE-050809-24]
ENSDARG00000077506	tjp1a	1495.05	-0.764165	0.168068	-4.54675	5.44794e-06	0.000254233	tight junction protein 1a [Source:ZFIN;Acc:ZDB-GENE-031001-2]
ENSDARG00000004692	nabp1a	536.043	-0.763533	0.250968	-3.04236	0.00234734	0.0261867	nucleic acid binding protein 1a [Source:NCBI gene;Acc:494100]
ENSDARG00000089917	sh3tc2	293.057	-0.762032	0.247324	-3.08111	0.00206231	0.0237511	SH3 domain and tetratricopeptide repeats 2 [Source:ZFIN;Acc:ZDB-GENE-081104-347]
ENSDARG00000022129	rbm4.3	2397.24	-0.761146	0.0918124	-8.29024	1.13022e-16	9.21944e-14	RNA binding motif protein 4.3 [Source:ZFIN;Acc:ZDB-GENE-040426-1938]
ENSDARG00000044011	xkrx	143.058	-0.758452	0.260695	-2.90935	0.00362186	0.0358721	XK related X-linked [Source:ZFIN;Acc:ZDB-GENE-041114-108]
ENSDARG00000051953	ythdc1	717.179	-0.756309	0.188821	-4.00542	6.19072e-05	0.00169232	YTH domain containing 1 [Source:ZFIN;Acc:ZDB-GENE-041114-114]
ENSDARG00000104672	CABZ01074397.1	804.761	-0.755673	0.262714	-2.87641	0.00402228	0.0385714	NACHT, LRR and PYD domains-containing protein 3-like [Source:NCBI gene;Acc:100535428]
ENSDARG00000056112	pikfyve	844.505	-0.755583	0.254011	-2.97461	0.00293366	0.0307643	phosphoinositide kinase, FYVE finger containing [Source:ZFIN;Acc:ZDB-GENE-030131-9636]
ENSDARG00000023323	ywhaqb	3901.88	-0.754061	0.174187	-4.32904	1.49759e-05	0.000538272	tyrosine 3-monooxygenase/tryptophan 5-monooxygenase activation protein, theta polypeptide b [Source:ZFIN;Acc:ZDB-GENE-030131-7135]
ENSDARG00000073952	slc4a7	284.753	-0.754029	0.24263	-3.10773	0.00188527	0.0222677	solute carrier family 4 member 7 [Source:ZFIN;Acc:ZDB-GENE-140106-104]
ENSDARG00000100157	tamm41	128.701	-0.753122	0.211654	-3.55827	0.000373301	0.00654457	TAM41 mitochondrial translocator assembly and maintenance homolog [Source:NCBI gene;Acc:641323]
ENSDARG00000019897	gpat4	299.53	-0.752414	0.239083	-3.14708	0.00164909	0.0202241	glycerol-3-phosphate acyltransferase 4 [Source:ZFIN;Acc:ZDB-GENE-060421-5102]
ENSDARG00000104285	armh3	322.262	-0.751335	0.217373	-3.45642	0.000547393	0.00871429	armadillo like helical domain containing 3 [Source:NCBI gene;Acc:393591]
ENSDARG00000044809	fpgs	896.04	-0.750873	0.23675	-3.17159	0.00151607	0.0190026	folylpolyglutamate synthase [Source:ZFIN;Acc:ZDB-GENE-040426-2781]
ENSDARG00000007711	rab3il1	161.377	-0.749121	0.250606	-2.98924	0.0027967	0.0297328	RAB3A interacting protein (rabin3)-like 1 [Source:ZFIN;Acc:ZDB-GENE-110921-5]
ENSDARG00000038010	rac2	856.976	-0.746598	0.264871	-2.81872	0.00482149	0.0441314	Rac family small GTPase 2 [Source:ZFIN;Acc:ZDB-GENE-040625-27]
ENSDARG00000011897	tsg101b	436.172	-0.745323	0.200519	-3.71697	0.000201629	0.00416175	tumor susceptibility 101b [Source:ZFIN;Acc:ZDB-GENE-130530-542]
ENSDARG00000052783	cdc42ep3	182.983	-0.744476	0.259608	-2.86769	0.00413483	0.0392376	CDC42 effector protein (Rho GTPase binding) 3 [Source:ZFIN;Acc:ZDB-GENE-040912-89]
ENSDARG00000098946	pald1a	279.24	-0.742334	0.225796	-3.28763	0.00101036	0.0139031	phosphatase domain containing paladin 1a [Source:NCBI gene;Acc:368369]
ENSDARG00000020944	ezra	2071.93	-0.740883	0.247842	-2.98934	0.00279585	0.0297328	ezrin a [Source:ZFIN;Acc:ZDB-GENE-050522-18]
ENSDARG00000102418	enc2	180.088	-0.738818	0.250278	-2.95199	0.0031573	0.0325186	ectodermal-neural cortex 2 [Source:ZFIN;Acc:ZDB-GENE-131014-1]
ENSDARG00000109373	tmbim1b	234.102	-0.735982	0.243942	-3.01703	0.00255264	0.0278214	transmembrane BAX inhibitor motif containing 1b [Source:ZFIN;Acc:ZDB-GENE-170110-3]
ENSDARG00000058693	cast	3608.67	-0.733802	0.263224	-2.78774	0.00530764	0.0469483	calpastatin [Source:ZFIN;Acc:ZDB-GENE-050810-2]
ENSDARG00000021374	cab39l1	883.381	-0.730874	0.13441	-5.43764	5.39899e-08	6.29152e-06	calcium binding protein 39, like 1 [Source:ZFIN;Acc:ZDB-GENE-040426-2897]
ENSDARG00000025977	blmh	769.617	-0.727526	0.192503	-3.7793	0.000157269	0.00344488	bleomycin hydrolase [Source:ZFIN;Acc:ZDB-GENE-030131-8485]
ENSDARG00000005359	sucla2	2109.95	-0.725474	0.165818	-4.37511	1.21371e-05	0.000460058	succinate-CoA ligase, ADP-forming, beta subunit [Source:ZFIN;Acc:ZDB-GENE-040426-1963]
ENSDARG00000068246	plcb3	826.692	-0.723026	0.222166	-3.25444	0.00113616	0.0151829	phospholipase C, beta 3 (phosphatidylinositol-specific) [Source:ZFIN;Acc:ZDB-GENE-030616-594]
ENSDARG00000040727	tfb1m	102.728	-0.722624	0.245076	-2.94857	0.00319249	0.0328027	transcription factor B1, mitochondrial [Source:ZFIN;Acc:ZDB-GENE-060929-1010]
ENSDARG00000070787	jupa	4311.38	-0.721922	0.235879	-3.06056	0.00220923	0.0249738	junction plakoglobin a [Source:ZFIN;Acc:ZDB-GENE-991207-22]
ENSDARG00000074675	pan2	276.126	-0.720623	0.206722	-3.48596	0.00049038	0.00799765	poly(A) specific ribonuclease subunit PAN2 [Source:ZFIN;Acc:ZDB-GENE-030131-3113]
ENSDARG00000045930	rbpms2a	369.132	-0.717391	0.22882	-3.13517	0.00171755	0.0207993	RNA binding protein, mRNA processing factor 2a [Source:ZFIN;Acc:ZDB-GENE-040718-106]
ENSDARG00000059503	ACSF3	91.275	-0.713969	0.233013	-3.06407	0.00218345	0.0247373	acyl-CoA synthetase family member 3 [Source:NCBI gene;Acc:562292]
ENSDARG00000079470	cdk17	299.09	-0.712511	0.247964	-2.87345	0.0040602	0.0387429	cyclin-dependent kinase 17 [Source:ZFIN;Acc:ZDB-GENE-041210-15]
ENSDARG00000018178	pgm2	741.207	-0.708065	0.214819	-3.29609	0.00098039	0.01361	phosphoglucomutase 2 [Source:ZFIN;Acc:ZDB-GENE-040426-2218]
ENSDARG00000022659	snx4	835.958	-0.706776	0.232114	-3.04496	0.00232714	0.0260415	sorting nexin 4 [Source:ZFIN;Acc:ZDB-GENE-030131-1923]
ENSDARG00000039466	hnrnph3	362.947	-0.706774	0.170374	-4.14838	3.34842e-05	0.00103934	heterogeneous nuclear ribonucleoprotein H3 (2H9) [Source:ZFIN;Acc:ZDB-GENE-060421-3878]
ENSDARG00000051888	ist1	1081.63	-0.704255	0.180922	-3.89259	9.91807e-05	0.00242517	IST1 factor associated with ESCRT-III [Source:ZFIN;Acc:ZDB-GENE-030131-179]
ENSDARG00000031907	ptbp1b	781.816	-0.702957	0.253701	-2.77081	0.00559176	0.0487898	polypyrimidine tract binding protein 1b [Source:ZFIN;Acc:ZDB-GENE-030131-9796]
ENSDARG00000062263	arhgap17b	346.865	-0.698411	0.248763	-2.80754	0.00499216	0.0450665	Rho GTPase activating protein 17b [Source:ZFIN;Acc:ZDB-GENE-080220-26]
ENSDARG00000015374	st3gal3a	320.445	-0.697521	0.223137	-3.12598	0.00177212	0.0212022	ST3 beta-galactoside alpha-2,3-sialyltransferase 3a [Source:ZFIN;Acc:ZDB-GENE-040426-1322]
ENSDARG00000037017	ube4b	920.172	-0.696177	0.195201	-3.56646	0.000361836	0.00639421	ubiquitination factor E4B, UFD2 homolog (S. cerevisiae) [Source:ZFIN;Acc:ZDB-GENE-020205-1]
ENSDARG00000036911	scamp1	235.649	-0.69389	0.235356	-2.94826	0.00319572	0.0328149	secretory carrier membrane protein 1 [Source:ZFIN;Acc:ZDB-GENE-040426-1803]
ENSDARG00000017910	pdss1	323.434	-0.69345	0.205776	-3.36994	0.000751856	0.0110865	prenyl (decaprenyl) diphosphate synthase, subunit 1 [Source:ZFIN;Acc:ZDB-GENE-030131-4430]
ENSDARG00000036063	ppp1r11	264.58	-0.692957	0.22266	-3.11218	0.0018571	0.0220058	protein phosphatase 1, regulatory (inhibitor) subunit 11 [Source:NCBI gene;Acc:550290]
ENSDARG00000074149	itpr1b	1078.64	-0.692461	0.240797	-2.8757	0.00403131	0.0385899	inositol 1,4,5-trisphosphate receptor, type 1b [Source:ZFIN;Acc:ZDB-GENE-070604-2]
ENSDARG00000015902	stat6	442.73	-0.692435	0.248365	-2.78798	0.00530379	0.0469483	signal transducer and activator of transcription 6, interleukin-4 induced [Source:ZFIN;Acc:ZDB-GENE-030131-9359]
ENSDARG00000060207	traf7	299.312	-0.691169	0.200498	-3.44727	0.000566289	0.00894525	TNF receptor-associated factor 7 [Source:ZFIN;Acc:ZDB-GENE-070112-2212]
ENSDARG00000062082	hipk3b	340.844	-0.690982	0.245199	-2.81804	0.00483171	0.0441654	homeodomain interacting protein kinase 3b [Source:ZFIN;Acc:ZDB-GENE-030131-82]
[truncated: 49 more rows]
