# Supplementary material for: Transcriptome Analysis Reveals the Molecular Basis of Overfeeding-Induced Diabetes in Zebrafish
Source: Int J Mol Sci. 2023 Jul 26;24(15):11994. doi: 10.3390/ijms241511994 (PMC10418320; doi:10.3390/ijms241511994)
Supplement: Supplementary file 1 [file ijms-24-11994-s001.zip › Supplementary Table S2_KEGG enrichment analysis results of DEGs.xlsx]

## Sheet: Sheet1
KEGG enrichment analysis results for up-regulated DEGs
Term	Database	ID	Input number	Background number	P-Value	Corrected P-Value	Input	Hyperlink
Metabolic pathways	KEGG PATHWAY	dre01100	179	1431	1.8984e-17	1.45204e-14	ENSDARG00000099106|ENSDARG00000016687|ENSDARG00000014068|ENSDARG00000102055|ENSDARG00000025904|ENSDARG00000103811|ENSDARG00000074169|ENSDARG00000095464|ENSDARG00000099524|ENSDARG00000017388|ENSDARG00000063414|ENSDARG00000017058|ENSDARG00000055159|ENSDARG00000059437|ENSDARG00000021220|ENSDARG00000019838|ENSDARG00000086998|ENSDARG00000012194|ENSDARG00000019532|ENSDARG00000042428|ENSDARG00000002249|…	http://www.genome.jp/kegg-bin/show pathway?dre01100/dre:393497%09red/dre:393493%09red/dre:140634%09red/dre:64607%09red/dre:557716%09red/dre:561018%09red/dre:373132%09red/dre:30068%09red/dre:100334605%09red/dre:378960%09red/dre:405861%09red/dre:553595%09red/dre:561030%09red/dre:394033%09red/dre:334161%09red/dre:567938%09red/dre:550494%09red/dre:322341%09red/dre:555376%09red/dre:378441%09red/dre:39…
Fatty acid degradation	KEGG PATHWAY	dre00071	22	45	6.25237e-13	2.39114e-10	ENSDARG00000045888|ENSDARG00000016687|ENSDARG00000102055|ENSDARG00000004687|ENSDARG00000038618|ENSDARG00000001578|ENSDARG00000070029|ENSDARG00000030781|ENSDARG00000037061|ENSDARG00000088357|ENSDARG00000028087|ENSDARG00000102412|ENSDARG00000089924|ENSDARG00000014727|ENSDARG00000057128|ENSDARG00000038881|ENSDARG00000030765|ENSDARG00000038900|ENSDARG00000018002|ENSDARG00000069100|ENSDARG00000098831|…	http://www.genome.jp/kegg-bin/show pathway?dre00071/dre:100536795%09red/dre:431754%09red/dre:445121%09red/dre:573723%09red/dre:334101%09red/dre:394156%09red/dre:436918%09red/dre:445290%09red/dre:399481%09red/dre:100005587%09red/dre:406325%09red/dre:406283%09red/dre:368239%09red/dre:393462%09red/dre:336606%09red/dre:368912%09red/dre:445288%09red/dre:100000859%09red/dre:449662%09red/dre:100005717%0…
Valine, leucine and isoleucine degradation	KEGG PATHWAY	dre00280	21	55	1.80431e-10	5.52029e-08	ENSDARG00000038881|ENSDARG00000045888|ENSDARG00000040555|ENSDARG00000037061|ENSDARG00000053485|ENSDARG00000030765|ENSDARG00000021220|ENSDARG00000089924|ENSDARG00000054400|ENSDARG00000102055|ENSDARG00000004687|ENSDARG00000038900|ENSDARG00000042658|ENSDARG00000070029|ENSDARG00000038910|ENSDARG00000057128|ENSDARG00000069100|ENSDARG00000030781|ENSDARG00000001578|ENSDARG00000099154|ENSDARG00000028087	http://www.genome.jp/kegg-bin/show pathway?dre00280/dre:100536795%09red/dre:394190%09red/dre:445288%09red/dre:431754%09red/dre:445290%09red/dre:393462%09red/dre:406325%09red/dre:100000859%09red/dre:368912%09red/dre:336606%09red/dre:394130%09red/dre:554124%09red/dre:436647%09red/dre:406283%09red/dre:368239%09red/dre:445121%09red/dre:553401%09red/dre:100005587%09red/dre:405861%09red/dre:100004018%0…
Peroxisome	KEGG PATHWAY	dre04146	25	85	7.36478e-10	1.87771e-07	ENSDARG00000104732|ENSDARG00000043848|ENSDARG00000040352|ENSDARG00000004687|ENSDARG00000021135|ENSDARG00000070029|ENSDARG00000021220|ENSDARG00000012194|ENSDARG00000104085|ENSDARG00000098904|ENSDARG00000032431|ENSDARG00000102412|ENSDARG00000035601|ENSDARG00000040248|ENSDARG00000014727|ENSDARG00000013973|ENSDARG00000014138|ENSDARG00000012915|ENSDARG00000086740|ENSDARG00000020529|ENSDARG00000003144|…	http://www.genome.jp/kegg-bin/show pathway?dre04146/dre:431754%09red/dre:30068%09red/dre:393539%09red/dre:436918%09red/dre:100000859%09red/dre:553204%09red/dre:450052%09red/dre:553653%09red/dre:393197%09red/dre:394140%09red/dre:394190%09red/dre:447868%09red/dre:793906%09red/dre:100329471%09red/dre:406803%09red/dre:550521%09red/dre:449545%09red/dre:436833%09red/dre:450048%09red/dre:449662%09red/dr…
beta-Alanine metabolism	KEGG PATHWAY	dre00410	15	37	3.21937e-08	6.15602e-06	ENSDARG00000104732|ENSDARG00000037061|ENSDARG00000053485|ENSDARG00000089924|ENSDARG00000027419|ENSDARG00000015537|ENSDARG00000014727|ENSDARG00000008155|ENSDARG00000070029|ENSDARG00000057128|ENSDARG00000069100|ENSDARG00000030781|ENSDARG00000001578|ENSDARG00000099154|ENSDARG00000028087	http://www.genome.jp/kegg-bin/show pathway?dre00410/dre:100536795%09red/dre:553401%09red/dre:100000859%09red/dre:449662%09red/dre:368912%09red/dre:378441%09red/dre:550403%09red/dre:100037349%09red/dre:436647%09red/dre:368239%09red/dre:393462%09red/dre:80872%09red/dre:100005587%09red/dre:445288%09red/dre:399481%09red
Fatty acid metabolism	KEGG PATHWAY	dre01212	19	67	1.33718e-07	1.70462e-05	ENSDARG00000038881|ENSDARG00000045888|ENSDARG00000004402|ENSDARG00000016687|ENSDARG00000014806|ENSDARG00000102055|ENSDARG00000025904|ENSDARG00000004687|ENSDARG00000038900|ENSDARG00000014727|ENSDARG00000012194|ENSDARG00000070029|ENSDARG00000030765|ENSDARG00000038618|ENSDARG00000057128|ENSDARG00000088357|ENSDARG00000001578|ENSDARG00000019532|ENSDARG00000030781	http://www.genome.jp/kegg-bin/show pathway?dre01212/dre:394156%09red/dre:368912%09red/dre:445288%09red/dre:431754%09red/dre:445290%09red/dre:449662%09red/dre:406325%09red/dre:100000859%09red/dre:317738%09red/dre:334121%09red/dre:326954%09red/dre:140615%09red/dre:406283%09red/dre:393839%09red/dre:445121%09red/dre:553401%09red/dre:336606%09red/dre:573723%09red/dre:100005717%09red
Metabolism of xenobiotics by cytochrome P450	KEGG PATHWAY	dre00980	13	36	9.34416e-07	9.99078e-05	ENSDARG00000098315|ENSDARG00000042533|ENSDARG00000042620|ENSDARG00000056510|ENSDARG00000019081|ENSDARG00000029473|ENSDARG00000095464|ENSDARG00000028336|ENSDARG00000042854|ENSDARG00000042428|ENSDARG00000104068|ENSDARG00000102744|ENSDARG00000017388	http://www.genome.jp/kegg-bin/show pathway?dre00980/dre:563972%09red/dre:393493%09red/dre:140634%09red/dre:393556%09red/dre:406736%09red/dre:324366%09red/dre:571365%09red/dre:449558%09red/dre:406433%09red/dre:394043%09red/dre:564619%09red/dre:79381%09red/dre:436833%09red
Butanoate metabolism	KEGG PATHWAY	dre00650	11	25	9.78601e-07	9.99078e-05	ENSDARG00000045888|ENSDARG00000059388|ENSDARG00000030765|ENSDARG00000027419|ENSDARG00000076544|ENSDARG00000021220|ENSDARG00000057128|ENSDARG00000015537|ENSDARG00000001578|ENSDARG00000070029|ENSDARG00000030781	http://www.genome.jp/kegg-bin/show pathway?dre00650/dre:368912%09red/dre:394190%09red/dre:100037356%09red/dre:445290%09red/dre:550403%09red/dre:100000859%09red/dre:378441%09red/dre:445288%09red/dre:445121%09red/dre:553401%09red/dre:565235%09red
Tryptophan metabolism	KEGG PATHWAY	dre00380	15	50	1.37658e-06	0.000131614	ENSDARG00000045888|ENSDARG00000098315|ENSDARG00000099106|ENSDARG00000030765|ENSDARG00000089924|ENSDARG00000001578|ENSDARG00000037061|ENSDARG00000070029|ENSDARG00000104702|ENSDARG00000057128|ENSDARG00000098831|ENSDARG00000016415|ENSDARG00000069100|ENSDARG00000099154|ENSDARG00000028087	http://www.genome.jp/kegg-bin/show pathway?dre00380/dre:553401%09red/dre:100536795%09red/dre:494076%09red/dre:140634%09red/dre:445290%09red/dre:393462%09red/dre:368912%09red/dre:450003%09red/dre:30068%09red/dre:445121%09red/dre:100000859%09red/dre:368239%09red/dre:550372%09red/dre:100005587%09red/dre:399481%09red
Propanoate metabolism	KEGG PATHWAY	dre00640	11	33	1.3132e-05	0.000956599	ENSDARG00000045888|ENSDARG00000053485|ENSDARG00000040555|ENSDARG00000014727|ENSDARG00000071076|ENSDARG00000038910|ENSDARG00000057128|ENSDARG00000104732|ENSDARG00000001578|ENSDARG00000070029|ENSDARG00000030781	http://www.genome.jp/kegg-bin/show pathway?dre00640/dre:368912%09red/dre:445290%09red/dre:449662%09red/dre:100000859%09red/dre:436747%09red/dre:445288%09red/dre:436647%09red/dre:554124%09red/dre:553401%09red/dre:405861%09red/dre:100037349%09red
Glycerolipid metabolism	KEGG PATHWAY	dre00561	15	63	2.0558e-05	0.00142948	ENSDARG00000099154|ENSDARG00000037061|ENSDARG00000036549|ENSDARG00000089924|ENSDARG00000036820|ENSDARG00000060120|ENSDARG00000074169|ENSDARG00000103320|ENSDARG00000042551|ENSDARG00000035257|ENSDARG00000016048|ENSDARG00000069100|ENSDARG00000036155|ENSDARG00000069940|ENSDARG00000028087	http://www.genome.jp/kegg-bin/show pathway?dre00561/dre:100536795%09red/dre:450083%09red/dre:393462%09red/dre:406554%09red/dre:445326%09red/dre:436958%09red/dre:559124%09red/dre:692278%09red/dre:570678%09red/dre:406734%09red/dre:368239%09red/dre:100332911%09red/dre:378960%09red/dre:100005587%09red/dre:399481%09red
PPAR signaling pathway	KEGG PATHWAY	dre03320	15	66	3.46904e-05	0.00209441	ENSDARG00000057262|ENSDARG00000069186|ENSDARG00000054048|ENSDARG00000088357|ENSDARG00000055159|ENSDARG00000004687|ENSDARG00000038900|ENSDARG00000014727|ENSDARG00000012194|ENSDARG00000070029|ENSDARG00000053215|ENSDARG00000038618|ENSDARG00000023290|ENSDARG00000007697|ENSDARG00000019532	http://www.genome.jp/kegg-bin/show pathway?dre03320/dre:394156%09red/dre:431754%09red/dre:100034463%09red/dre:449662%09red/dre:322341%09red/dre:58128%09red/dre:100000859%09red/dre:171478%09red/dre:100005717%09red/dre:406283%09red/dre:393839%09red/dre:768196%09red/dre:565876%09red/dre:795106%09red/dre:140615%09red
Ascorbate and aldarate metabolism	KEGG PATHWAY	dre00053	8	19	3.93846e-05	0.00209441	ENSDARG00000037061|ENSDARG00000098645|ENSDARG00000089924|ENSDARG00000069409|ENSDARG00000019838|ENSDARG00000069100|ENSDARG00000099154|ENSDARG00000028087	http://www.genome.jp/kegg-bin/show pathway?dre00053/dre:100536795%09red/dre:393462%09red/dre:569254%09red/dre:403070%09red/dre:368239%09red/dre:100005587%09red/dre:116991%09red/dre:399481%09red
Glutathione metabolism	KEGG PATHWAY	dre00480	13	56	9.14448e-05	0.00399678	ENSDARG00000042533|ENSDARG00000042620|ENSDARG00000056510|ENSDARG00000017388|ENSDARG00000045123|ENSDARG00000029473|ENSDARG00000018146|ENSDARG00000013302|ENSDARG00000008155|ENSDARG00000042428|ENSDARG00000104068|ENSDARG00000102744|ENSDARG00000095464	http://www.genome.jp/kegg-bin/show pathway?dre00480/dre:563972%09red/dre:393493%09red/dre:393556%09red/dre:406736%09red/dre:324366%09red/dre:571365%09red/dre:564619%09red/dre:79381%09red/dre:436833%09red/dre:100151110%09red/dre:80872%09red/dre:352926%09red/dre:393191%09red
Pentose and glucuronate interconversions	KEGG PATHWAY	dre00040	8	22	0.000107822	0.00458169	ENSDARG00000005578|ENSDARG00000019081|ENSDARG00000069409|ENSDARG00000019838|ENSDARG00000028336|ENSDARG00000035257|ENSDARG00000079271|ENSDARG00000053405	http://www.genome.jp/kegg-bin/show pathway?dre00040/dre:570613%09red/dre:569254%09red/dre:445326%09red/dre:449558%09red/dre:406433%09red/dre:550282%09red/dre:116991%09red/dre:555748%09red
Arginine and proline metabolism	KEGG PATHWAY	dre00330	13	59	0.000151649	0.00626987	ENSDARG00000037061|ENSDARG00000010085|ENSDARG00000059700|ENSDARG00000035601|ENSDARG00000089924|ENSDARG00000038207|ENSDARG00000008155|ENSDARG00000068910|ENSDARG00000036239|ENSDARG00000069100|ENSDARG00000018944|ENSDARG00000099154|ENSDARG00000028087	http://www.genome.jp/kegg-bin/show pathway?dre00330/dre:405806%09red/dre:100536795%09red/dre:266799%09red/dre:393462%09red/dre:373132%09red/dre:402994%09red/dre:556522%09red/dre:394133%09red/dre:60658%09red/dre:368239%09red/dre:80872%09red/dre:100005587%09red/dre:399481%09red
Histidine metabolism	KEGG PATHWAY	dre00340	8	25	0.000254055	0.0101595	ENSDARG00000007366|ENSDARG00000037061|ENSDARG00000075454|ENSDARG00000007421|ENSDARG00000089924|ENSDARG00000069100|ENSDARG00000099154|ENSDARG00000028087	http://www.genome.jp/kegg-bin/show pathway?dre00340/dre:100536795%09red/dre:393462%09red/dre:394052%09red/dre:402826%09red/dre:368239%09red/dre:399481%09red/dre:100005587%09red/dre:793609%09red
Drug metabolism - cytochrome P450	KEGG PATHWAY	dre00982	9	33	0.000342106	0.0127643	ENSDARG00000042533|ENSDARG00000042620|ENSDARG00000056510|ENSDARG00000017388|ENSDARG00000042428|ENSDARG00000104068|ENSDARG00000102744|ENSDARG00000095464|ENSDARG00000029473	http://www.genome.jp/kegg-bin/show pathway?dre00982/dre:563972%09red/dre:393493%09red/dre:393556%09red/dre:406736%09red/dre:324366%09red/dre:571365%09red/dre:564619%09red/dre:79381%09red/dre:436833%09red
Lysine degradation	KEGG PATHWAY	dre00310	13	69	0.000653947	0.0211315	ENSDARG00000045888|ENSDARG00000037894|ENSDARG00000030765|ENSDARG00000089924|ENSDARG00000001578|ENSDARG00000037061|ENSDARG00000070029|ENSDARG00000057128|ENSDARG00000098831|ENSDARG00000028087|ENSDARG00000069100|ENSDARG00000099154|ENSDARG00000016415	http://www.genome.jp/kegg-bin/show pathway?dre00310/dre:100536795%09red/dre:553401%09red/dre:368912%09red/dre:445290%09red/dre:393462%09red/dre:450003%09red/dre:664754%09red/dre:445121%09red/dre:100000859%09red/dre:368239%09red/dre:494076%09red/dre:100005587%09red/dre:399481%09red
Amino sugar and nucleotide sugar metabolism	KEGG PATHWAY	dre00520	11	56	0.00118977	0.0316739	ENSDARG00000028088|ENSDARG00000057334|ENSDARG00000005578|ENSDARG00000069409|ENSDARG00000005891|ENSDARG00000013561|ENSDARG00000019838|ENSDARG00000018966|ENSDARG00000030786|ENSDARG00000039892|ENSDARG00000075143	http://www.genome.jp/kegg-bin/show pathway?dre00520/dre:569254%09red/dre:613246%09red/dre:561018%09red/dre:394000%09red/dre:449829%09red/dre:554143%09red/dre:336553%09red/dre:555748%09red/dre:324560%09red/dre:116991%09red/dre:553795%09red
Fatty acid elongation	KEGG PATHWAY	dre00062	8	35	0.00216322	0.0542488	ENSDARG00000038881|ENSDARG00000004402|ENSDARG00000014806|ENSDARG00000102055|ENSDARG00000025904|ENSDARG00000030765|ENSDARG00000057128|ENSDARG00000001578	http://www.genome.jp/kegg-bin/show pathway?dre00062/dre:368912%09red/dre:406325%09red/dre:445121%09red/dre:317738%09red/dre:334121%09red/dre:326954%09red/dre:553401%09red/dre:336606%09red
Primary bile acid biosynthesis	KEGG PATHWAY	dre00120	6	21	0.00258364	0.0631084	ENSDARG00000069186|ENSDARG00000055159|ENSDARG00000057262|ENSDARG00000012194|ENSDARG00000057435|ENSDARG00000014138	http://www.genome.jp/kegg-bin/show pathway?dre00120/dre:322341%09red/dre:450052%09red/dre:553653%09red/dre:393839%09red/dre:565876%09red/dre:795106%09red
Biosynthesis of unsaturated fatty acids	KEGG PATHWAY	dre01040	7	29	0.00298414	0.0667919	ENSDARG00000004402|ENSDARG00000014806|ENSDARG00000025904|ENSDARG00000004687|ENSDARG00000014727|ENSDARG00000012194|ENSDARG00000019532	http://www.genome.jp/kegg-bin/show pathway?dre01040/dre:431754%09red/dre:449662%09red/dre:317738%09red/dre:334121%09red/dre:326954%09red/dre:393839%09red/dre:140615%09red
Mannose type O-glycan biosynthesis	KEGG PATHWAY	dre00515	6	23	0.00401242	0.0789962	ENSDARG00000063414|ENSDARG00000059437|ENSDARG00000017058|ENSDARG00000046133|ENSDARG00000015252|ENSDARG00000077583	http://www.genome.jp/kegg-bin/show pathway?dre00515/dre:553716%09red/dre:446214%09red/dre:407659%09red/dre:100006345%09red/dre:557187%09red/dre:101669768%09red
alpha-Linolenic acid metabolism	KEGG PATHWAY	dre00592	5	18	0.00648108	0.113959	ENSDARG00000014727|ENSDARG00000042090|ENSDARG00000015662|ENSDARG00000019532|ENSDARG00000004687	http://www.genome.jp/kegg-bin/show pathway?dre00592/dre:449662%09red/dre:406739%09red/dre:431754%09red/dre:140615%09red/dre:100148818%09red
Glyoxylate and dicarboxylate metabolism	KEGG PATHWAY	dre00630	7	36	0.00930811	0.146122	ENSDARG00000045888|ENSDARG00000099106|ENSDARG00000018944|ENSDARG00000060120|ENSDARG00000030166|ENSDARG00000038910|ENSDARG00000104702	http://www.genome.jp/kegg-bin/show pathway?dre00630/dre:393305%09red/dre:445290%09red/dre:30068%09red/dre:405806%09red/dre:570678%09red/dre:405861%09red/dre:550372%09red
Pyruvate metabolism	KEGG PATHWAY	dre00620	8	45	0.00936096	0.146122	ENSDARG00000045888|ENSDARG00000037061|ENSDARG00000089924|ENSDARG00000071076|ENSDARG00000053215|ENSDARG00000069100|ENSDARG00000099154|ENSDARG00000028087	http://www.genome.jp/kegg-bin/show pathway?dre00620/dre:100536795%09red/dre:445290%09red/dre:393462%09red/dre:436747%09red/dre:368239%09red/dre:768196%09red/dre:100005587%09red/dre:399481%09red
Phagosome	KEGG PATHWAY	dre04145	17	141	0.0109667	0.16131	ENSDARG00000079766|ENSDARG00000036940|ENSDARG00000013771|ENSDARG00000012942|ENSDARG00000016301|ENSDARG00000101794|ENSDARG00000102777|ENSDARG00000104436|ENSDARG00000018637|ENSDARG00000101322|ENSDARG00000053066|ENSDARG00000100435|ENSDARG00000068910|ENSDARG00000076290|ENSDARG00000035763|ENSDARG00000039522|ENSDARG00000041417	http://www.genome.jp/kegg-bin/show pathway?dre04145/dre:335798%09red/dre:436772%09red/dre:325317%09red/dre:563429%09red/dre:558552%09red/dre:563556%09red/dre:767746%09red/dre:327277%09red/dre:393398%09red/dre:100333043%09red/dre:554130%09red/dre:450017%09red/dre:494477%09red/dre:60658%09red/dre:100004566%09red/dre:554127%09red/dre:337572%09red
Galactose metabolism	KEGG PATHWAY	dre00052	6	30	0.0136777	0.197391	ENSDARG00000036415|ENSDARG00000028088|ENSDARG00000057630|ENSDARG00000005578|ENSDARG00000013561|ENSDARG00000036155	http://www.genome.jp/kegg-bin/show pathway?dre00052/dre:548343%09red/dre:450083%09red/dre:394000%09red/dre:449829%09red/dre:436646%09red/dre:555748%09red
Retinol metabolism	KEGG PATHWAY	dre00830	7	41	0.0177165	0.22034	ENSDARG00000098315|ENSDARG00000104660|ENSDARG00000018600|ENSDARG00000016213|ENSDARG00000021135|ENSDARG00000028048|ENSDARG00000058730	http://www.genome.jp/kegg-bin/show pathway?dre00830/dre:556557%09red/dre:140634%09red/dre:553501%09red/dre:280648%09red/dre:325922%09red/dre:393539%09red/dre:562840%09red
Glycine, serine and threonine metabolism	KEGG PATHWAY	dre00260	7	42	0.0198862	0.243367	ENSDARG00000038643|ENSDARG00000035601|ENSDARG00000060120|ENSDARG00000036239|ENSDARG00000100304|ENSDARG00000014068|ENSDARG00000058102	http://www.genome.jp/kegg-bin/show pathway?dre00260/dre:327165%09red/dre:266799%09red/dre:64607%09red/dre:402994%09red/dre:100331020%09red/dre:570678%09red/dre:394103%09red
Carbon metabolism	KEGG PATHWAY	dre01200	15	130	0.0227126	0.263216	ENSDARG00000045888|ENSDARG00000098645|ENSDARG00000053485|ENSDARG00000019496|ENSDARG00000060120|ENSDARG00000014727|ENSDARG00000053215|ENSDARG00000038910|ENSDARG00000104702|ENSDARG00000057128|ENSDARG00000014068|ENSDARG00000055642|ENSDARG00000001578|ENSDARG00000070029|ENSDARG00000030781	http://www.genome.jp/kegg-bin/show pathway?dre01200/dre:327165%09red/dre:368912%09red/dre:445288%09red/dre:445290%09red/dre:449662%09red/dre:100000859%09red/dre:30068%09red/dre:403070%09red/dre:550494%09red/dre:436647%09red/dre:570678%09red/dre:768196%09red/dre:553401%09red/dre:405861%09red/dre:100148522%09red
Alanine, aspartate and glutamate metabolism	KEGG PATHWAY	dre00250	7	44	0.0247681	0.278595	ENSDARG00000033361|ENSDARG00000055642|ENSDARG00000076544|ENSDARG00000015537|ENSDARG00000038207|ENSDARG00000017590|ENSDARG00000027419	http://www.genome.jp/kegg-bin/show pathway?dre00250/dre:393423%09red/dre:550403%09red/dre:378441%09red/dre:394133%09red/dre:402904%09red/dre:565235%09red/dre:100148522%09red
Synthesis and degradation of ketone bodies	KEGG PATHWAY	dre00072	3	10	0.0271524	0.290464	ENSDARG00000045888|ENSDARG00000059388|ENSDARG00000021220	http://www.genome.jp/kegg-bin/show pathway?dre00072/dre:394190%09red/dre:100037356%09red/dre:445290%09red
Glycolysis / Gluconeogenesis	KEGG PATHWAY	dre00010	10	77	0.0287937	0.305882	ENSDARG00000057630|ENSDARG00000037061|ENSDARG00000014068|ENSDARG00000089924|ENSDARG00000013561|ENSDARG00000071076|ENSDARG00000035257|ENSDARG00000069100|ENSDARG00000099154|ENSDARG00000028087	http://www.genome.jp/kegg-bin/show pathway?dre00010/dre:327165%09red/dre:100536795%09red/dre:393462%09red/dre:436747%09red/dre:445326%09red/dre:394000%09red/dre:436646%09red/dre:368239%09red/dre:100005587%09red/dre:399481%09red
Drug metabolism - other enzymes	KEGG PATHWAY	dre00983	8	62	0.0486237	0.383413	ENSDARG00000042533|ENSDARG00000042620|ENSDARG00000017388|ENSDARG00000042428|ENSDARG00000104068|ENSDARG00000102744|ENSDARG00000095464|ENSDARG00000029473	http://www.genome.jp/kegg-bin/show pathway?dre00983/dre:563972%09red/dre:393493%09red/dre:393556%09red/dre:406736%09red/dre:324366%09red/dre:571365%09red/dre:564619%09red/dre:79381%09red
KEGG enrichment analysis results for down-regulated DEGs
#Term	Database	ID	Input number	Background number	P-Value	Corrected P-Value	Input	Hyperlink
Tight junction	KEGG PATHWAY	dre04530	45	200	4.37383e-07	0.000149348	ENSDARG00000043128|ENSDARG00000015955|ENSDARG00000087983|ENSDARG00000062263|ENSDARG00000041107|ENSDARG00000014047|ENSDARG00000104484|ENSDARG00000003865|ENSDARG00000017834|ENSDARG00000038123|ENSDARG00000068628|ENSDARG00000037746|ENSDARG00000025076|ENSDARG00000087646|ENSDARG00000009544|ENSDARG00000045367|ENSDARG00000058128|ENSDARG00000060596|ENSDARG00000094673|ENSDARG00000061948|ENSDARG00000063295|…	http://www.genome.jp/kegg-bin/show_pathway?dre04530/dre:368266%09red/dre:81591%09red/dre:286739%09red/dre:100001198%09red/dre:100150331%09red/dre:335865%09red/dre:555703%09red/dre:335916%09red/dre:570216%09red/dre:321070%09red/dre:559634%09red/dre:573644%09red/dre:100093706%09red/dre:100535324%09red/dre:393998%09red/dre:436612%09red/dre:60635%09red/dre:58126%09red/dre:494075%09red/dre:556298%09re…
Apoptosis	KEGG PATHWAY	dre04210	34	155	1.74726e-05	0.00298308	ENSDARG00000007836|ENSDARG00000074656|ENSDARG00000013161|ENSDARG00000004586|ENSDARG00000003902|ENSDARG00000075110|ENSDARG00000055592|ENSDARG00000009511|ENSDARG00000069484|ENSDARG00000069482|ENSDARG00000040251|ENSDARG00000037746|ENSDARG00000074149|ENSDARG00000045367|ENSDARG00000005651|ENSDARG00000013576|ENSDARG00000013415|ENSDARG00000043581|ENSDARG00000005416|ENSDARG00000079144|ENSDARG00000098696|…	http://www.genome.jp/kegg-bin/show_pathway?dre04210/dre:100002454%09red/dre:550475%09red/dre:406463%09red/dre:555703%09red/dre:557109%09red/dre:100002263%09red/dre:558045%09red/dre:100148503%09red/dre:335916%09red/dre:393548%09red/dre:100149388%09red/dre:100190951%09red/dre:570238%09red/dre:558237%09red/dre:114401%09red/dre:553656%09red/dre:30546%09red/dre:405785%09red/dre:373107%09red/dre:415099…
C-type lectin receptor signaling pathway	KEGG PATHWAY	dre04625	28	117	2.1204e-05	0.00301679	ENSDARG00000013161|ENSDARG00000038754|ENSDARG00000105261|ENSDARG00000075253|ENSDARG00000006052|ENSDARG00000009511|ENSDARG00000074149|ENSDARG00000075800|ENSDARG00000098700|ENSDARG00000038687|ENSDARG00000094673|ENSDARG00000005651|ENSDARG00000014962|ENSDARG00000098696|ENSDARG00000100927|ENSDARG00000075456|ENSDARG00000010276|ENSDARG00000058381|ENSDARG00000033443|ENSDARG00000077768|ENSDARG00000078147|…	http://www.genome.jp/kegg-bin/show_pathway?dre04625/dre:561737%09red/dre:559020%09red/dre:561914%09red/dre:406463%09red/dre:557926%09red/dre:557109%09red/dre:100002263%09red/dre:30637%09red/dre:259196%09red/dre:553957%09red/dre:335916%09red/dre:100149388%09red/dre:327321%09red/dre:553656%09red/dre:562552%09red/dre:405785%09red/dre:100333254%09red/dre:415099%09red/dre:393228%09red/dre:405770%09red…
NOD-like receptor signaling pathway	KEGG PATHWAY	dre04621	29	140	0.000180191	0.0146494	ENSDARG00000074149|ENSDARG00000022000|ENSDARG00000031954|ENSDARG00000020625|ENSDARG00000068857|ENSDARG00000009511|ENSDARG00000063159|ENSDARG00000104795|ENSDARG00000100534|ENSDARG00000094673|ENSDARG00000067723|ENSDARG00000027777|ENSDARG00000056615|ENSDARG00000098696|ENSDARG00000024746|ENSDARG00000030598|ENSDARG00000020326|ENSDARG00000058381|ENSDARG00000105261|ENSDARG00000104290|ENSDARG00000098700|…	http://www.genome.jp/kegg-bin/show_pathway?dre04621/dre:100001532%09red/dre:373874%09red/dre:406463%09red/dre:335916%09red/dre:415099%09red/dre:100536675%09red/dre:100149388%09red/dre:566871%09red/dre:562552%09red/dre:559296%09red/dre:405785%09red/dre:373107%09red/dre:445119%09red/dre:393132%09red/dre:564497%09red/dre:405770%09red/dre:431715%09red/dre:557239%09red/dre:114401%09red/dre:100006041%0…
Cytokine-cytokine receptor interaction	KEGG PATHWAY	dre04060	31	174	0.00128462	0.0510051	ENSDARG00000095378|ENSDARG00000091003|ENSDARG00000041041|ENSDARG00000045959|ENSDARG00000103108|ENSDARG00000037859|ENSDARG00000009511|ENSDARG00000101040|ENSDARG00000104795|ENSDARG00000035435|ENSDARG00000040777|ENSDARG00000058244|ENSDARG00000087804|ENSDARG00000080020|ENSDARG00000055136|ENSDARG00000070961|ENSDARG00000032571|ENSDARG00000115610|ENSDARG00000034895|ENSDARG00000039351|ENSDARG00000039436|…	http://www.genome.jp/kegg-bin/show_pathway?dre04060/dre:368326%09red/dre:100192217%09red/dre:560446%09red/dre:562247%09red/dre:556728%09red/dre:100134973%09red/dre:563884%09red/dre:561268%09red/dre:100134935%09red/dre:553957%09red/dre:567241%09red/dre:100333914%09red/dre:560193%09red/dre:563003%09red/dre:100331938%09red/dre:405785%09red/dre:799475%09red/dre:561494%09red/dre:795469%09red/dre:10053…
AGE-RAGE signaling pathway in diabetic complications	KEGG PATHWAY	dre04933	23	120	0.00210662	0.0609594	ENSDARG00000013161|ENSDARG00000036912|ENSDARG00000075253|ENSDARG00000087574|ENSDARG00000009511|ENSDARG00000104795|ENSDARG00000059001|ENSDARG00000005673|ENSDARG00000005651|ENSDARG00000100020|ENSDARG00000055136|ENSDARG00000056615|ENSDARG00000098696|ENSDARG00000034895|ENSDARG00000075456|ENSDARG00000052063|ENSDARG00000058381|ENSDARG00000105261|ENSDARG00000098700|ENSDARG00000043531|ENSDARG00000068246|…	http://www.genome.jp/kegg-bin/show_pathway?dre04933/dre:100001532%09red/dre:560446%09red/dre:100002263%09red/dre:563884%09red/dre:335916%09red/dre:555604%09red/dre:337489%09red/dre:553656%09red/dre:562552%09red/dre:405785%09red/dre:30682%09red/dre:415099%09red/dre:393228%09red/dre:405770%09red/dre:550423%09red/dre:561737%09red/dre:393386%09red/dre:58032%09red/dre:100002946%09red/dre:323561%09red/…
Cell adhesion molecules (CAMs)	KEGG PATHWAY	dre04514	22	121	0.00475044	0.104588	ENSDARG00000043128|ENSDARG00000015955|ENSDARG00000014047|ENSDARG00000104484|ENSDARG00000059906|ENSDARG00000009544|ENSDARG00000062831|ENSDARG00000069888|ENSDARG00000069503|ENSDARG00000078643|ENSDARG00000043133|ENSDARG00000016081|ENSDARG00000103479|ENSDARG00000045391|ENSDARG00000098899|ENSDARG00000003091|ENSDARG00000112049|ENSDARG00000068784|ENSDARG00000042282|ENSDARG00000000472|ENSDARG00000057826|…	http://www.genome.jp/kegg-bin/show_pathway?dre04514/dre:568593%09red/dre:81591%09red/dre:560816%09red/dre:570216%09red/dre:140819%09red/dre:573644%09red/dre:436612%09red/dre:60635%09red/dre:100001136%09red/dre:791164%09red/dre:503893%09red/dre:81587%09red/dre:81584%09red/dre:81585%09red/dre:81582%09red/dre:81580%09red/dre:81581%09red/dre:494075%09red/dre:100537676%09red/dre:557935%09red/dre:30726…
VEGF signaling pathway	KEGG PATHWAY	dre04370	15	73	0.00635658	0.125788	ENSDARG00000111612|ENSDARG00000100927|ENSDARG00000038010|ENSDARG00000013161|ENSDARG00000017321|ENSDARG00000075456|ENSDARG00000059406|ENSDARG00000010276|ENSDARG00000075253|ENSDARG00000005651|ENSDARG00000058381|ENSDARG00000103542|ENSDARG00000024546|ENSDARG00000002552|ENSDARG00000014962	http://www.genome.jp/kegg-bin/show_pathway?dre04370/dre:100333254%09red/dre:554230%09red/dre:790934%09red/dre:559020%09red/dre:393228%09red/dre:327321%09red/dre:415151%09red/dre:557926%09red/dre:557109%09red/dre:30682%09red/dre:100002263%09red/dre:553656%09red/dre:562552%09red/dre:30554%09red/dre:561737%09red
Inositol phosphate metabolism	KEGG PATHWAY	dre00562	16	82	0.00787852	0.136889	ENSDARG00000017757|ENSDARG00000003517|ENSDARG00000013056|ENSDARG00000056112|ENSDARG00000033666|ENSDARG00000060841|ENSDARG00000075456|ENSDARG00000068246|ENSDARG00000075253|ENSDARG00000087297|ENSDARG00000070686|ENSDARG00000060946|ENSDARG00000059960|ENSDARG00000079253|ENSDARG00000034080|ENSDARG00000003446	http://www.genome.jp/kegg-bin/show_pathway?dre00562/dre:100001532%09red/dre:406598%09red/dre:561737%09red/dre:437018%09red/dre:541511%09red/dre:337690%09red/dre:406667%09red/dre:337489%09red/dre:100002263%09red/dre:406290%09red/dre:100000275%09red/dre:571356%09red/dre:100149843%09red/dre:404620%09red/dre:100334231%09red/dre:566479%09red
FoxO signaling pathway	KEGG PATHWAY	dre04068	26	159	0.00861288	0.138723	ENSDARG00000013161|ENSDARG00000038754|ENSDARG00000074851|ENSDARG00000076554|ENSDARG00000038858|ENSDARG00000075253|ENSDARG00000075172|ENSDARG00000013847|ENSDARG00000045150|ENSDARG00000060596|ENSDARG00000042690|ENSDARG00000005651|ENSDARG00000013576|ENSDARG00000055136|ENSDARG00000043581|ENSDARG00000079144|ENSDARG00000034895|ENSDARG00000062460|ENSDARG00000075456|ENSDARG00000025522|ENSDARG00000058381|…	http://www.genome.jp/kegg-bin/show_pathway?dre04068/dre:403037%09red/dre:560446%09red/dre:568316%09red/dre:100134973%09red/dre:100002263%09red/dre:563884%09red/dre:30637%09red/dre:553957%09red/dre:564523%09red/dre:324140%09red/dre:100190951%09red/dre:393228%09red/dre:553656%09red/dre:562552%09red/dre:393548%09red/dre:402857%09red/dre:64617%09red/dre:497646%09red/dre:561737%09red/dre:100151416%09r…
Toll-like receptor signaling pathway	KEGG PATHWAY	dre04620	17	91	0.00938647	0.143084	ENSDARG00000005481|ENSDARG00000098696|ENSDARG00000052322|ENSDARG00000098700|ENSDARG00000100534|ENSDARG00000022000|ENSDARG00000075456|ENSDARG00000043531|ENSDARG00000061710|ENSDARG00000044415|ENSDARG00000058381|ENSDARG00000105261|ENSDARG00000104795|ENSDARG00000075253|ENSDARG00000040135|ENSDARG00000009511|ENSDARG00000040251	http://www.genome.jp/kegg-bin/show_pathway?dre04620/dre:405785%09red/dre:561737%09red/dre:445119%09red/dre:563727%09red/dre:403138%09red/dre:403139%09red/dre:393132%09red/dre:550475%09red/dre:100002946%09red/dre:406463%09red/dre:570238%09red/dre:405770%09red/dre:100002263%09red/dre:565756%09red/dre:562552%09red/dre:335916%09red/dre:415099%09red
Salmonella infection	KEGG PATHWAY	dre05132	17	91	0.00938647	0.143084	ENSDARG00000031976|ENSDARG00000098696|ENSDARG00000052322|ENSDARG00000098700|ENSDARG00000037746|ENSDARG00000060184|ENSDARG00000043531|ENSDARG00000004877|ENSDARG00000044415|ENSDARG00000092281|ENSDARG00000026925|ENSDARG00000058381|ENSDARG00000105261|ENSDARG00000104795|ENSDARG00000040135|ENSDARG00000004301|ENSDARG00000039142	http://www.genome.jp/kegg-bin/show_pathway?dre05132/dre:560840%09red/dre:563654%09red/dre:415099%09red/dre:563023%09red/dre:403138%09red/dre:403139%09red/dre:100002946%09red/dre:570238%09red/dre:405770%09red/dre:57934%09red/dre:336504%09red/dre:565756%09red/dre:562552%09red/dre:336933%09red/dre:335916%09red/dre:404036%09red/dre:321070%09red
ABC transporters	KEGG PATHWAY	dre02010	9	38	0.0135129	0.174776	ENSDARG00000096662|ENSDARG00000074635|ENSDARG00000021787|ENSDARG00000041107|ENSDARG00000076547|ENSDARG00000061233|ENSDARG00000011573|ENSDARG00000056200|ENSDARG00000061591	http://www.genome.jp/kegg-bin/show_pathway?dre02010/dre:559080%09red/dre:336563%09red/dre:797269%09red/dre:100003744%09red/dre:570148%09red/dre:798527%09red/dre:336147%09red/dre:323301%09red/dre:558924%09red
Arachidonic acid metabolism	KEGG PATHWAY	dre00590	10	45	0.0142955	0.181565	ENSDARG00000020136|ENSDARG00000023526|ENSDARG00000057273|ENSDARG00000018342|ENSDARG00000052148|ENSDARG00000069463|ENSDARG00000010276|ENSDARG00000096445|ENSDARG00000040255|ENSDARG00000024546	http://www.genome.jp/kegg-bin/show_pathway?dre00590/dre:246226%09red/dre:559020%09red/dre:569014%09red/dre:560649%09red/dre:322732%09red/dre:544666%09red/dre:393387%09red/dre:30554%09red/dre:494099%09red/dre:567204%09red
ECM-receptor interaction	KEGG PATHWAY	dre04512	15	81	0.0150828	0.185257	ENSDARG00000052063|ENSDARG00000020072|ENSDARG00000114141|ENSDARG00000028507|ENSDARG00000024829|ENSDARG00000104484|ENSDARG00000059906|ENSDARG00000002084|ENSDARG00000032639|ENSDARG00000002494|ENSDARG00000078362|ENSDARG00000042282|ENSDARG00000060410|ENSDARG00000062974|ENSDARG00000054619	http://www.genome.jp/kegg-bin/show_pathway?dre04512/dre:568593%09red/dre:100149028%09red/dre:100536533%09red/dre:563428%09red/dre:100499533%09red/dre:252850%09red/dre:503893%09red/dre:100535241%09red/dre:101885031%09red/dre:30234%09red/dre:436636%09red/dre:335269%09red/dre:337767%09red/dre:570216%09red/dre:323561%09red
Cellular senescence	KEGG PATHWAY	dre04218	27	176	0.0159578	0.191044	ENSDARG00000016154|ENSDARG00000013161|ENSDARG00000074149|ENSDARG00000033443|ENSDARG00000076554|ENSDARG00000075253|ENSDARG00000075800|ENSDARG00000104795|ENSDARG00000061941|ENSDARG00000062082|ENSDARG00000005651|ENSDARG00000013576|ENSDARG00000055136|ENSDARG00000043581|ENSDARG00000014962|ENSDARG00000098696|ENSDARG00000100927|ENSDARG00000034895|ENSDARG00000075456|ENSDARG00000058381|ENSDARG00000008141|…	http://www.genome.jp/kegg-bin/show_pathway?dre04218/dre:560446%09red/dre:557926%09red/dre:561280%09red/dre:557109%09red/dre:100002263%09red/dre:563884%09red/dre:30637%09red/dre:557850%09red/dre:100149388%09red/dre:327321%09red/dre:553656%09red/dre:562552%09red/dre:777733%09red/dre:100150414%09red/dre:100333254%09red/dre:415099%09red/dre:795522%09red/dre:393228%09red/dre:497646%09red/dre:561737%09…
Focal adhesion	KEGG PATHWAY	dre04510	33	226	0.0161642	0.191044	ENSDARG00000038010|ENSDARG00000075733|ENSDARG00000037746|ENSDARG00000017321|ENSDARG00000059406|ENSDARG00000031698|ENSDARG00000104484|ENSDARG00000055592|ENSDARG00000092281|ENSDARG00000038123|ENSDARG00000013847|ENSDARG00000062974|ENSDARG00000094673|ENSDARG00000002084|ENSDARG00000005651|ENSDARG00000002494|ENSDARG00000020072|ENSDARG00000078362|ENSDARG00000075456|ENSDARG00000114141|ENSDARG00000004877|…	http://www.genome.jp/kegg-bin/show_pathway?dre04510/dre:100536533%09red/dre:561737%09red/dre:252850%09red/dre:100499533%09red/dre:323561%09red/dre:557109%09red/dre:100002263%09red/dre:335916%09red/dre:570216%09red/dre:321070%09red/dre:795752%09red/dre:100149028%09red/dre:563023%09red/dre:415151%09red/dre:100535241%09red/dre:553656%09red/dre:567874%09red/dre:373107%09red/dre:30682%09red/dre:503893…
Metabolic pathways	KEGG PATHWAY	dre01100	163	1431	0.0221078	0.206254	ENSDARG00000060841|ENSDARG00000010941|ENSDARG00000011665|ENSDARG00000012407|ENSDARG00000041895|ENSDARG00000006491|ENSDARG00000096445|ENSDARG00000040255|ENSDARG00000056331|ENSDARG00000015449|ENSDARG00000056112|ENSDARG00000099185|ENSDARG00000009612|ENSDARG00000044094|ENSDARG00000069543|ENSDARG00000024546|ENSDARG00000030733|ENSDARG00000102114|ENSDARG00000071475|ENSDARG00000039452|ENSDARG00000053774|…	http://www.genome.jp/kegg-bin/show_pathway?dre01100/dre:100001532%09red/dre:406330%09red/dre:64608%09red/dre:406339%09red/dre:406338%09red/dre:406725%09red/dre:560649%09red/dre:555401%09red/dre:565706%09red/dre:323329%09red/dre:406528%09red/dre:553246%09red/dre:572070%09red/dre:436919%09red/dre:562292%09red/dre:561416%09red/dre:334561%09red/dre:559442%09red/dre:563020%09red/dre:322732%09red/dre:1…
MAPK signaling pathway	KEGG PATHWAY	dre04010	47	355	0.0238469	0.210983	ENSDARG00000111612|ENSDARG00000092362|ENSDARG00000013161|ENSDARG00000004586|ENSDARG00000017321|ENSDARG00000014804|ENSDARG00000038010|ENSDARG00000092281|ENSDARG00000013847|ENSDARG00000029688|ENSDARG00000009511|ENSDARG00000033437|ENSDARG00000071357|ENSDARG00000024546|ENSDARG00000098700|ENSDARG00000061710|ENSDARG00000038687|ENSDARG00000005651|ENSDARG00000013576|ENSDARG00000043581|ENSDARG00000055136|…	http://www.genome.jp/kegg-bin/show_pathway?dre04010/dre:30256%09red/dre:560446%09red/dre:30671%09red/dre:393998%09red/dre:557926%09red/dre:557109%09red/dre:563884%09red/dre:555703%09red/dre:335916%09red/dre:393548%09red/dre:790934%09red/dre:563727%09red/dre:563023%09red/dre:327321%09red/dre:415151%09red/dre:570238%09red/dre:393228%09red/dre:553656%09red/dre:562552%09red/dre:777728%09red/dre:30546…
Fructose and mannose metabolism	KEGG PATHWAY	dre00051	9	42	0.0238505	0.210983	ENSDARG00000039452|ENSDARG00000060504|ENSDARG00000012801|ENSDARG00000019702|ENSDARG00000011665|ENSDARG00000029075|ENSDARG00000055540|ENSDARG00000001953|ENSDARG00000101482	http://www.genome.jp/kegg-bin/show_pathway?dre00051/dre:369193%09red/dre:554477%09red/dre:336425%09red/dre:406339%09red/dre:386663%09red/dre:556190%09red/dre:570106%09red/dre:406791%09red/dre:561416%09red
Mucin type O-glycan biosynthesis	KEGG PATHWAY	dre00512	7	29	0.0251164	0.21767	ENSDARG00000012355|ENSDARG00000062278|ENSDARG00000014386|ENSDARG00000057303|ENSDARG00000043814|ENSDARG00000012745|ENSDARG00000045851	http://www.genome.jp/kegg-bin/show_pathway?dre00512/dre:559373%09red/dre:555344%09red/dre:406477%09red/dre:553668%09red/dre:568547%09red/dre:564336%09red/dre:503760%09red
Galactose metabolism	KEGG PATHWAY	dre00052	7	30	0.0293789	0.242751	ENSDARG00000039452|ENSDARG00000060504|ENSDARG00000012801|ENSDARG00000092404|ENSDARG00000069543|ENSDARG00000018178|ENSDARG00000101482	http://www.genome.jp/kegg-bin/show_pathway?dre00052/dre:406339%09red/dre:405822%09red/dre:791130%09red/dre:570106%09red/dre:406791%09red/dre:796436%09red/dre:561416%09red
Glycerophospholipid metabolism	KEGG PATHWAY	dre00564	16	97	0.0313578	0.242751	ENSDARG00000006491|ENSDARG00000104793|ENSDARG00000060626|ENSDARG00000035028|ENSDARG00000079790|ENSDARG00000019897|ENSDARG00000053010|ENSDARG00000034262|ENSDARG00000057125|ENSDARG00000070686|ENSDARG00000058162|ENSDARG00000062430|ENSDARG00000096445|ENSDARG00000013542|ENSDARG00000024546|ENSDARG00000102114	http://www.genome.jp/kegg-bin/show_pathway?dre00564/dre:724010%09red/dre:100150463%09red/dre:100001552%09red/dre:572492%09red/dre:561832%09red/dre:559442%09red/dre:794598%09red/dre:327566%09red/dre:560649%09red/dre:553683%09red/dre:567414%09red/dre:30554%09red/dre:678522%09red/dre:751628%09red/dre:404620%09red/dre:565743%09red
Sphingolipid metabolism	KEGG PATHWAY	dre00600	11	60	0.0358964	0.265305	ENSDARG00000060534|ENSDARG00000079790|ENSDARG00000058327|ENSDARG00000018619|ENSDARG00000018976|ENSDARG00000002365|ENSDARG00000042270|ENSDARG00000003977|ENSDARG00000012829|ENSDARG00000053525|ENSDARG00000053526	http://www.genome.jp/kegg-bin/show_pathway?dre00600/dre:100330155%09red/dre:493602%09red/dre:541416%09red/dre:100003745%09red/dre:323020%09red/dre:794598%09red/dre:557817%09red/dre:557756%09red/dre:555206%09red/dre:553646%09red/dre:569930%09red
Glycolysis / Gluconeogenesis	KEGG PATHWAY	dre00010	13	77	0.0419058	0.294425	ENSDARG00000039914|ENSDARG00000039452|ENSDARG00000044142|ENSDARG00000012801|ENSDARG00000019702|ENSDARG00000099730|ENSDARG00000022456|ENSDARG00000011665|ENSDARG00000018178|ENSDARG00000101251|ENSDARG00000101482|ENSDARG00000013750|ENSDARG00000060504	http://www.genome.jp/kegg-bin/show_pathway?dre00010/dre:369193%09red/dre:541435%09red/dre:336425%09red/dre:406339%09red/dre:405822%09red/dre:30496%09red/dre:393668%09red/dre:570106%09red/dre:406791%09red/dre:406367%09red/dre:334116%09red/dre:335817%09red/dre:561416%09red
Pentose phosphate pathway	KEGG PATHWAY	dre00030	7	33	0.0450052	0.305486	ENSDARG00000060504|ENSDARG00000012801|ENSDARG00000019702|ENSDARG00000011665|ENSDARG00000006019|ENSDARG00000018178|ENSDARG00000015343	http://www.genome.jp/kegg-bin/show_pathway?dre00030/dre:369193%09red/dre:336425%09red/dre:405822%09red/dre:378713%09red/dre:406762%09red/dre:570106%09red/dre:561416%09red
Phosphatidylinositol signaling system	KEGG PATHWAY	dre04070	16	102	0.045529	0.307238	ENSDARG00000074149|ENSDARG00000060841|ENSDARG00000104793|ENSDARG00000013056|ENSDARG00000056112|ENSDARG00000033666|ENSDARG00000075456|ENSDARG00000060626|ENSDARG00000068246|ENSDARG00000075800|ENSDARG00000003517|ENSDARG00000075253|ENSDARG00000038615|ENSDARG00000003446|ENSDARG00000034080|ENSDARG00000070686	http://www.genome.jp/kegg-bin/show_pathway?dre04070/dre:100001532%09red/dre:724010%09red/dre:100150463%09red/dre:556136%09red/dre:561737%09red/dre:100149388%09red/dre:437018%09red/dre:541511%09red/dre:337690%09red/dre:406667%09red/dre:337489%09red/dre:571356%09red/dre:406290%09red/dre:404620%09red/dre:100002263%09red/dre:560151%09red
Glycosaminoglycan biosynthesis - keratan sulfate	KEGG PATHWAY	dre00533	4	14	0.0494826	0.315228	ENSDARG00000015449|ENSDARG00000104042|ENSDARG00000038489|ENSDARG00000061357	http://www.genome.jp/kegg-bin/show_pathway?dre00533/dre:797512%09red/dre:100170782%09red/dre:286748%09red/dre:492760%09red
