# Supplementary material for: Transcriptome Analysis Reveals the Molecular Basis of Overfeeding-Induced Diabetes in Zebrafish
Source: Int J Mol Sci. 2023 Jul 26;24(15):11994. doi: 10.3390/ijms241511994 (PMC10418320; doi:10.3390/ijms241511994)
Supplement: Supplementary file 1 [file ijms-24-11994-s001.zip › Supplementary Table S3_Jaccard similarity coefficient of KEGG signaling pathways.xlsx]

## Sheet: Sheet1
Jaccard similarity coefficient of KEGG signaling pathways from up-regulated DEGs								Jaccard similarity coefficient of KEGG signaling pathways from down-regulated DEGs
	Term1	Term2	Jaccard index						Term1	Term2	Jaccard index
616	Drug metabolism - other enzymes	Drug metabolism - cytochrome P450	0.888889					259	Phosphatidylinositol signaling system	Inositol phosphate metabolism	0.52381
42	Lysine degradation	Tryptophan metabolism	0.75					144	Fructose and mannose metabolism	Glycolysis / Gluconeogenesis	0.375
521	Glutathione metabolism	Drug metabolism - cytochrome P450	0.692308					301	Salmonella infection	Toll-like receptor signaling pathway	0.36
611	Metabolism of xenobiotics by cytochrome P450	Drug metabolism - cytochrome P450	0.692308					209	C-type lectin receptor signaling pathway	Cellular senescence	0.341463
520	Glutathione metabolism	Drug metabolism - other enzymes	0.615385					139	Fructose and mannose metabolism	Pentose phosphate pathway	0.333333
610	Metabolism of xenobiotics by cytochrome P450	Drug metabolism - other enzymes	0.615385					146	Fructose and mannose metabolism	Galactose metabolism	0.333333
70	Valine, leucine and isoleucine degradation	Fatty acid degradation	0.535714					148	Focal adhesion	ECM-receptor interaction	0.333333
519	Glutathione metabolism	Metabolism of xenobiotics by cytochrome P450	0.529412					347	Pentose phosphate pathway	Glycolysis / Gluconeogenesis	0.333333
3	Fatty acid metabolism	Fatty acid degradation	0.518519					374	Glycolysis / Gluconeogenesis	Galactose metabolism	0.333333
564	Glycolysis / Gluconeogenesis	Pyruvate metabolism	0.5					208	C-type lectin receptor signaling pathway	VEGF signaling pathway	0.30303
37	Lysine degradation	Fatty acid degradation	0.458333					109	FoxO signaling pathway	Cellular senescence	0.292683
492	Histidine metabolism	Ascorbate and aldarate metabolism	0.454545					314	Toll-like receptor signaling pathway	AGE-RAGE signaling pathway in diabetic complications	0.290323
494	Histidine metabolism	Pyruvate metabolism	0.454545					313	Toll-like receptor signaling pathway	NOD-like receptor signaling pathway	0.277778
629	Ascorbate and aldarate metabolism	Pyruvate metabolism	0.454545					226	VEGF signaling pathway	Cellular senescence	0.272727
137	Propanoate metabolism	Carbon metabolism	0.444444					349	Pentose phosphate pathway	Galactose metabolism	0.272727
107	Fatty acid degradation	Tryptophan metabolism	0.423077					214	C-type lectin receptor signaling pathway	Toll-like receptor signaling pathway	0.25
10	Fatty acid metabolism	Fatty acid elongation	0.421053					249	Cellular senescence	AGE-RAGE signaling pathway in diabetic complications	0.25
36	Lysine degradation	Valine, leucine and isoleucine degradation	0.416667					216	C-type lectin receptor signaling pathway	AGE-RAGE signaling pathway in diabetic complications	0.243902
40	Lysine degradation	beta-Alanine metabolism	0.4					1	Cell adhesion molecules (CAMs)	Tight junction	0.240741
69	Lysine degradation	Pyruvate metabolism	0.4					245	Cellular senescence	Apoptosis	0.22
73	Valine, leucine and isoleucine degradation	beta-Alanine metabolism	0.384615					61	MAPK signaling pathway	VEGF signaling pathway	0.215686
75	Valine, leucine and isoleucine degradation	Tryptophan metabolism	0.384615					212	C-type lectin receptor signaling pathway	Apoptosis	0.215686
482	Histidine metabolism	Glycolysis / Gluconeogenesis	0.384615					289	Apoptosis	Toll-like receptor signaling pathway	0.214286
562	Glycolysis / Gluconeogenesis	Ascorbate and aldarate metabolism	0.384615					215	C-type lectin receptor signaling pathway	NOD-like receptor signaling pathway	0.212766
105	Fatty acid degradation	beta-Alanine metabolism	0.37037					324	NOD-like receptor signaling pathway	AGE-RAGE signaling pathway in diabetic complications	0.209302
12	Fatty acid metabolism	Biosynthesis of unsaturated fatty acids	0.368421					65	MAPK signaling pathway	Apoptosis	0.208955
136	Propanoate metabolism	beta-Alanine metabolism	0.368421					107	FoxO signaling pathway	C-type lectin receptor signaling pathway	0.2
197	beta-Alanine metabolism	Tryptophan metabolism	0.363636					62	MAPK signaling pathway	Cellular senescence	0.193548
279	Tryptophan metabolism	Pyruvate metabolism	0.352941					60	MAPK signaling pathway	C-type lectin receptor signaling pathway	0.190476
2	Fatty acid metabolism	Valine, leucine and isoleucine degradation	0.333333					233	VEGF signaling pathway	AGE-RAGE signaling pathway in diabetic complications	0.1875
71	Valine, leucine and isoleucine degradation	Propanoate metabolism	0.333333					69	MAPK signaling pathway	AGE-RAGE signaling pathway in diabetic complications	0.186441
356	Biosynthesis of unsaturated fatty acids	alpha-Linolenic acid metabolism	0.333333					303	Salmonella infection	AGE-RAGE signaling pathway in diabetic complications	0.176471
556	Glycolysis / Gluconeogenesis	Glycerolipid metabolism	0.315789					108	FoxO signaling pathway	VEGF signaling pathway	0.171429
52	Lysine degradation	Histidine metabolism	0.3125					151	Focal adhesion	VEGF signaling pathway	0.170732
67	Lysine degradation	Ascorbate and aldarate metabolism	0.3125					116	FoxO signaling pathway	AGE-RAGE signaling pathway in diabetic complications	0.166667
478	Histidine metabolism	Arginine and proline metabolism	0.3125					290	Apoptosis	NOD-like receptor signaling pathway	0.166667
508	Arginine and proline metabolism	Ascorbate and aldarate metabolism	0.3125					67	MAPK signaling pathway	Toll-like receptor signaling pathway	0.163636
510	Arginine and proline metabolism	Pyruvate metabolism	0.3125					291	Apoptosis	AGE-RAGE signaling pathway in diabetic complications	0.163265
13	Fatty acid metabolism	PPAR signaling pathway	0.307692					247	Cellular senescence	Toll-like receptor signaling pathway	0.157895
166	Butanoate metabolism	beta-Alanine metabolism	0.3					112	FoxO signaling pathway	Apoptosis	0.153846
135	Propanoate metabolism	Butanoate metabolism	0.294118					302	Salmonella infection	NOD-like receptor signaling pathway	0.15
72	Valine, leucine and isoleucine degradation	Butanoate metabolism	0.28					55	MAPK signaling pathway	FoxO signaling pathway	0.140625
57	Lysine degradation	Glycolysis / Gluconeogenesis	0.277778					155	Focal adhesion	Apoptosis	0.135593
207	beta-Alanine metabolism	Histidine metabolism	0.277778					213	C-type lectin receptor signaling pathway	Salmonella infection	0.125
222	beta-Alanine metabolism	Ascorbate and aldarate metabolism	0.277778					66	MAPK signaling pathway	Salmonella infection	0.122807
224	beta-Alanine metabolism	Pyruvate metabolism	0.277778					159	Focal adhesion	AGE-RAGE signaling pathway in diabetic complications	0.12
262	Tryptophan metabolism	Histidine metabolism	0.277778					68	MAPK signaling pathway	NOD-like receptor signaling pathway	0.117647
277	Tryptophan metabolism	Ascorbate and aldarate metabolism	0.277778					264	Phosphatidylinositol signaling system	AGE-RAGE signaling pathway in diabetic complications	0.114286
486	Histidine metabolism	Glycerolipid metabolism	0.277778					278	Inositol phosphate metabolism	AGE-RAGE signaling pathway in diabetic complications	0.114286
498	Arginine and proline metabolism	Glycolysis / Gluconeogenesis	0.277778					229	VEGF signaling pathway	Apoptosis	0.113636
600	Glycerolipid metabolism	Ascorbate and aldarate metabolism	0.277778					57	MAPK signaling pathway	Focal adhesion	0.111111
602	Glycerolipid metabolism	Pyruvate metabolism	0.277778					150	Focal adhesion	C-type lectin receptor signaling pathway	0.109091
194	Butanoate metabolism	Synthesis and degradation of ketone bodies	0.272727					288	Apoptosis	Salmonella infection	0.108696
208	beta-Alanine metabolism	Arginine and proline metabolism	0.272727					231	VEGF signaling pathway	Toll-like receptor signaling pathway	0.103448
39	Lysine degradation	Butanoate metabolism	0.263158					266	Phosphatidylinositol signaling system	Glycerophospholipid metabolism	0.103448
102	Valine, leucine and isoleucine degradation	Pyruvate metabolism	0.26087					243	Cellular senescence	Phosphatidylinositol signaling system	0.102564
4	Fatty acid metabolism	Propanoate metabolism	0.25					336	AGE-RAGE signaling pathway in diabetic complications	Cytokine-cytokine receptor interaction	0.102041
5	Fatty acid metabolism	Butanoate metabolism	0.25					210	C-type lectin receptor signaling pathway	Phosphatidylinositol signaling system	0.1
134	Fatty acid degradation	Pyruvate metabolism	0.25					246	Cellular senescence	Salmonella infection	0.1
196	beta-Alanine metabolism	Carbon metabolism	0.25					88	Metabolic pathways	Inositol phosphate metabolism	0.0981595
212	beta-Alanine metabolism	Glycolysis / Gluconeogenesis	0.25					248	Cellular senescence	NOD-like receptor signaling pathway	0.0980392
267	Tryptophan metabolism	Glycolysis / Gluconeogenesis	0.25					104	FoxO signaling pathway	Focal adhesion	0.0925926
307	Fatty acid elongation	Biosynthesis of unsaturated fatty acids	0.25					152	Focal adhesion	Cellular senescence	0.0909091
74	Valine, leucine and isoleucine degradation	Carbon metabolism	0.241379					7	Cell adhesion molecules (CAMs)	ECM-receptor interaction	0.0882353
53	Lysine degradation	Arginine and proline metabolism	0.238095					156	Focal adhesion	Salmonella infection	0.0869565
167	Butanoate metabolism	Carbon metabolism	0.238095					237	VEGF signaling pathway	Arachidonic acid metabolism	0.0869565
168	Butanoate metabolism	Tryptophan metabolism	0.238095					95	Metabolic pathways	Glycerophospholipid metabolism	0.0848485
385	PPAR signaling pathway	Primary bile acid biosynthesis	0.235294					32	Tight junction	Focal adhesion	0.0833333
103	Fatty acid degradation	Propanoate metabolism	0.222222					352	Glycerophospholipid metabolism	Arachidonic acid metabolism	0.0833333
104	Fatty acid degradation	Butanoate metabolism	0.222222					99	Metabolic pathways	Glycolysis / Gluconeogenesis	0.0797546
249	Carbon metabolism	Glyoxylate and dicarboxylate metabolism	0.222222					87	Metabolic pathways	Phosphatidylinositol signaling system	0.0783133
355	Biosynthesis of unsaturated fatty acids	PPAR signaling pathway	0.222222					119	FoxO signaling pathway	Cytokine-cytokine receptor interaction	0.0754717
61	Lysine degradation	Glycerolipid metabolism	0.217391					114	FoxO signaling pathway	Toll-like receptor signaling pathway	0.075
263	Tryptophan metabolism	Arginine and proline metabolism	0.217391					227	VEGF signaling pathway	Phosphatidylinositol signaling system	0.0689655
502	Arginine and proline metabolism	Glycerolipid metabolism	0.217391					228	VEGF signaling pathway	Inositol phosphate metabolism	0.0689655
7	Fatty acid metabolism	Carbon metabolism	0.214286					40	Tight junction	Apoptosis	0.0675676
422	Amino sugar and nucleotide sugar metabolism	Galactose metabolism	0.214286					317	Toll-like receptor signaling pathway	Cytokine-cytokine receptor interaction	0.0666667
77	Valine, leucine and isoleucine degradation	Fatty acid elongation	0.208333					262	Phosphatidylinositol signaling system	Toll-like receptor signaling pathway	0.0645161
85	Valine, leucine and isoleucine degradation	Histidine metabolism	0.208333					276	Inositol phosphate metabolism	Toll-like receptor signaling pathway	0.0645161
100	Valine, leucine and isoleucine degradation	Ascorbate and aldarate metabolism	0.208333					157	Focal adhesion	Toll-like receptor signaling pathway	0.0638298
38	Lysine degradation	Propanoate metabolism	0.2					260	Phosphatidylinositol signaling system	Apoptosis	0.0638298
109	Fatty acid degradation	Fatty acid elongation	0.2					97	Metabolic pathways	Arachidonic acid metabolism	0.0613497
117	Fatty acid degradation	Histidine metabolism	0.2					28	Tight junction	MAPK signaling pathway	0.0574713
132	Fatty acid degradation	Ascorbate and aldarate metabolism	0.2					252	Cellular senescence	Cytokine-cytokine receptor interaction	0.0545455
186	Butanoate metabolism	Alanine, aspartate and glutamate metabolism	0.2					72	MAPK signaling pathway	Cytokine-cytokine receptor interaction	0.0540541
216	beta-Alanine metabolism	Glycerolipid metabolism	0.2					219	C-type lectin receptor signaling pathway	Cytokine-cytokine receptor interaction	0.0535714
225	Carbon metabolism	Tryptophan metabolism	0.2					327	NOD-like receptor signaling pathway	Cytokine-cytokine receptor interaction	0.0526316
271	Tryptophan metabolism	Glycerolipid metabolism	0.2					41	Tight junction	Salmonella infection	0.0508475
106	Fatty acid degradation	Carbon metabolism	0.193548					158	Focal adhesion	NOD-like receptor signaling pathway	0.0508475
112	Fatty acid degradation	PPAR signaling pathway	0.193548					110	FoxO signaling pathway	Phosphatidylinositol signaling system	0.05
90	Valine, leucine and isoleucine degradation	Glycolysis / Gluconeogenesis	0.192308					111	FoxO signaling pathway	Inositol phosphate metabolism	0.05
170	Butanoate metabolism	Fatty acid elongation	0.1875					244	Cellular senescence	Inositol phosphate metabolism	0.0487805
421	Amino sugar and nucleotide sugar metabolism	Pentose and glucuronate interconversions	0.1875					83	Metabolic pathways	Sphingolipid metabolism	0.0481928
1	Fatty acid metabolism	Lysine degradation	0.185185					211	C-type lectin receptor signaling pathway	Inositol phosphate metabolism	0.047619
122	Fatty acid degradation	Glycolysis / Gluconeogenesis	0.185185					263	Phosphatidylinositol signaling system	NOD-like receptor signaling pathway	0.0465116
138	Propanoate metabolism	Tryptophan metabolism	0.181818					306	Salmonella infection	Cytokine-cytokine receptor interaction	0.0434783
378	PPAR signaling pathway	alpha-Linolenic acid metabolism	0.176471					94	Metabolic pathways	Pentose phosphate pathway	0.0429448
6	Fatty acid metabolism	beta-Alanine metabolism	0.172414					100	Metabolic pathways	Mucin type O-glycan biosynthesis	0.0429448
8	Fatty acid metabolism	Tryptophan metabolism	0.172414					101	Metabolic pathways	Galactose metabolism	0.0429448
86	Valine, leucine and isoleucine degradation	Arginine and proline metabolism	0.172414					153	Focal adhesion	Phosphatidylinositol signaling system	0.0425532
41	Lysine degradation	Carbon metabolism	0.166667					154	Focal adhesion	Inositol phosphate metabolism	0.0425532
44	Lysine degradation	Fatty acid elongation	0.166667					80	Metabolic pathways	Fructose and mannose metabolism	0.0424242
118	Fatty acid degradation	Arginine and proline metabolism	0.166667					274	Inositol phosphate metabolism	Apoptosis	0.0416667
94	Valine, leucine and isoleucine degradation	Glycerolipid metabolism	0.16129					200	Sphingolipid metabolism	Glycerophospholipid metabolism	0.0384615
276	Tryptophan metabolism	Glyoxylate and dicarboxylate metabolism	0.157895					6	Cell adhesion molecules (CAMs)	Focal adhesion	0.0377358
126	Fatty acid degradation	Glycerolipid metabolism	0.15625					235	VEGF signaling pathway	Glycerophospholipid metabolism	0.0333333
254	Tryptophan metabolism	Fatty acid elongation	0.15					230	VEGF signaling pathway	Salmonella infection	0.0322581
14	Fatty acid metabolism	alpha-Linolenic acid metabolism	0.142857					280	Inositol phosphate metabolism	Glycerophospholipid metabolism	0.0322581
457	Pentose and glucuronate interconversions	Ascorbate and aldarate metabolism	0.142857					294	Apoptosis	Cytokine-cytokine receptor interaction	0.031746
465	Galactose metabolism	Glycolysis / Gluconeogenesis	0.142857					30	Tight junction	FoxO signaling pathway	0.0289855
162	Propanoate metabolism	Glyoxylate and dicarboxylate metabolism	0.125					35	Tight junction	C-type lectin receptor signaling pathway	0.028169
76	Valine, leucine and isoleucine degradation	Metabolic pathways	0.117978					43	Tight junction	NOD-like receptor signaling pathway	0.0277778
140	Propanoate metabolism	Fatty acid elongation	0.117647					179	ECM-receptor interaction	AGE-RAGE signaling pathway in diabetic complications	0.027027
165	Propanoate metabolism	Pyruvate metabolism	0.117647					220	C-type lectin receptor signaling pathway	Arachidonic acid metabolism	0.027027
438	Amino sugar and nucleotide sugar metabolism	Ascorbate and aldarate metabolism	0.117647					113	FoxO signaling pathway	Salmonella infection	0.0238095
230	Carbon metabolism	PPAR signaling pathway	0.111111					232	VEGF signaling pathway	NOD-like receptor signaling pathway	0.0232558
332	Peroxisome	PPAR signaling pathway	0.111111					85	Metabolic pathways	VEGF signaling pathway	0.0229885
499	Arginine and proline metabolism	Glycine, serine and threonine metabolism	0.111111					277	Inositol phosphate metabolism	NOD-like receptor signaling pathway	0.0227273
626	Glyoxylate and dicarboxylate metabolism	Synthesis and degradation of ketone bodies	0.111111					93	Metabolic pathways	AGE-RAGE signaling pathway in diabetic complications	0.021978
340	Peroxisome	Primary bile acid biosynthesis	0.107143					49	Tight junction	ABC transporters	0.0188679
453	Pentose and glucuronate interconversions	Metabolism of xenobiotics by cytochrome P450	0.105263					115	FoxO signaling pathway	NOD-like receptor signaling pathway	0.0185185
108	Fatty acid degradation	Metabolic pathways	0.104972					73	MAPK signaling pathway	Arachidonic acid metabolism	0.0178571
331	Peroxisome	Biosynthesis of unsaturated fatty acids	0.103448					33	Tight junction	ECM-receptor interaction	0.0169492
9	Fatty acid metabolism	Metabolic pathways	0.100559					42	Tight junction	Toll-like receptor signaling pathway	0.0163934
11	Fatty acid metabolism	Peroxisome	0.1					71	MAPK signaling pathway	Glycerophospholipid metabolism	0.016129
215	beta-Alanine metabolism	Alanine, aspartate and glutamate metabolism	0.1					84	Metabolic pathways	C-type lectin receptor signaling pathway	0.0159574
241	Carbon metabolism	Glycine, serine and threonine metabolism	0.1					44	Tight junction	AGE-RAGE signaling pathway in diabetic complications	0.0149254
630	Synthesis and degradation of ketone bodies	Pyruvate metabolism	0.1					102	Metabolic pathways	Glycosaminoglycan biosynthesis - keratan sulfate	0.0121212
199	beta-Alanine metabolism	Fatty acid elongation	0.0952381					90	Metabolic pathways	Salmonella infection	0.011236
227	Carbon metabolism	Fatty acid elongation	0.0952381					91	Metabolic pathways	Toll-like receptor signaling pathway	0.011236
252	Carbon metabolism	Pyruvate metabolism	0.0952381					79	Metabolic pathways	FoxO signaling pathway	0.0106952
110	Fatty acid degradation	Peroxisome	0.0930233					86	Metabolic pathways	Cellular senescence	0.0106383
80	Valine, leucine and isoleucine degradation	PPAR signaling pathway	0.0909091					92	Metabolic pathways	NOD-like receptor signaling pathway	0.0105263
101	Valine, leucine and isoleucine degradation	Synthesis and degradation of ketone bodies	0.0909091					81	Metabolic pathways	Focal adhesion	0.0103093
141	Propanoate metabolism	Peroxisome	0.0909091					89	Metabolic pathways	Apoptosis	0.0102564
198	beta-Alanine metabolism	Metabolic pathways	0.0842697					54	MAPK signaling pathway	Metabolic pathways	0.00478469
226	Carbon metabolism	Metabolic pathways	0.0842697
253	Tryptophan metabolism	Metabolic pathways	0.0842697
297	Metabolic pathways	Glycerolipid metabolism	0.0842697
143	Propanoate metabolism	PPAR signaling pathway	0.0833333
363	Biosynthesis of unsaturated fatty acids	Primary bile acid biosynthesis	0.0833333
200	beta-Alanine metabolism	Peroxisome	0.0810811
228	Carbon metabolism	Peroxisome	0.0810811
113	Fatty acid degradation	alpha-Linolenic acid metabolism	0.08
99	Valine, leucine and isoleucine degradation	Glyoxylate and dicarboxylate metabolism	0.0769231
164	Propanoate metabolism	Synthesis and degradation of ketone bodies	0.0769231
441	Pentose and glucuronate interconversions	Galactose metabolism	0.0769231
572	Glycine, serine and threonine metabolism	Glyoxylate and dicarboxylate metabolism	0.0769231
111	Fatty acid degradation	Biosynthesis of unsaturated fatty acids	0.0740741
289	Metabolic pathways	Arginine and proline metabolism	0.0730337
290	Metabolic pathways	Glutathione metabolism	0.0730337
202	beta-Alanine metabolism	PPAR signaling pathway	0.0714286
333	Peroxisome	alpha-Linolenic acid metabolism	0.0714286
627	Glyoxylate and dicarboxylate metabolism	Pyruvate metabolism	0.0714286
78	Valine, leucine and isoleucine degradation	Peroxisome	0.0697674
43	Lysine degradation	Metabolic pathways	0.0670391
299	Metabolic pathways	Metabolism of xenobiotics by cytochrome P450	0.0670391
68	Lysine degradation	Synthesis and degradation of ketone bodies	0.0666667
144	Propanoate metabolism	alpha-Linolenic acid metabolism	0.0666667
281	Metabolic pathways	Peroxisome	0.0628272
553	Glycolysis / Gluconeogenesis	Glycine, serine and threonine metabolism	0.0625
139	Propanoate metabolism	Metabolic pathways	0.0617978
169	Butanoate metabolism	Metabolic pathways	0.0617978
283	Metabolic pathways	PPAR signaling pathway	0.0604396
142	Propanoate metabolism	Biosynthesis of unsaturated fatty acids	0.0588235
171	Butanoate metabolism	Peroxisome	0.0588235
192	Butanoate metabolism	Glyoxylate and dicarboxylate metabolism	0.0588235
251	Carbon metabolism	Synthesis and degradation of ketone bodies	0.0588235
278	Tryptophan metabolism	Synthesis and degradation of ketone bodies	0.0588235
447	Pentose and glucuronate interconversions	Glycolysis / Gluconeogenesis	0.0588235
293	Metabolic pathways	Glycolysis / Gluconeogenesis	0.0561798
195	Butanoate metabolism	Pyruvate metabolism	0.0555556
66	Lysine degradation	Glyoxylate and dicarboxylate metabolism	0.0526316
203	beta-Alanine metabolism	alpha-Linolenic acid metabolism	0.0526316
231	Carbon metabolism	alpha-Linolenic acid metabolism	0.0526316
255	Tryptophan metabolism	Peroxisome	0.0526316
501	Arginine and proline metabolism	Alanine, aspartate and glutamate metabolism	0.0526316
507	Arginine and proline metabolism	Glyoxylate and dicarboxylate metabolism	0.0526316
603	Retinol metabolism	Metabolism of xenobiotics by cytochrome P450	0.0526316
301	Metabolic pathways	Drug metabolism - cytochrome P450	0.0505618
153	Propanoate metabolism	Glycolysis / Gluconeogenesis	0.05
285	Metabolic pathways	Amino sugar and nucleotide sugar metabolism	0.05
428	Amino sugar and nucleotide sugar metabolism	Glycolysis / Gluconeogenesis	0.05
469	Galactose metabolism	Glycerolipid metabolism	0.05
34	Fatty acid metabolism	Synthesis and degradation of ketone bodies	0.047619
201	beta-Alanine metabolism	Biosynthesis of unsaturated fatty acids	0.047619
229	Carbon metabolism	Biosynthesis of unsaturated fatty acids	0.047619
243	Carbon metabolism	Alanine, aspartate and glutamate metabolism	0.047619
272	Tryptophan metabolism	Retinol metabolism	0.047619
567	Glycine, serine and threonine metabolism	Glycerolipid metabolism	0.047619
599	Glycerolipid metabolism	Glyoxylate and dicarboxylate metabolism	0.047619
250	Carbon metabolism	Ascorbate and aldarate metabolism	0.0454545
399	PPAR signaling pathway	Pyruvate metabolism	0.0454545
451	Pentose and glucuronate interconversions	Glycerolipid metabolism	0.0454545
280	Metabolic pathways	Fatty acid elongation	0.0449438
286	Metabolic pathways	Pentose and glucuronate interconversions	0.0449438
288	Metabolic pathways	Histidine metabolism	0.0449438
300	Metabolic pathways	Drug metabolism - other enzymes	0.0449438
303	Metabolic pathways	Ascorbate and aldarate metabolism	0.0449438
305	Metabolic pathways	Pyruvate metabolism	0.0449438
21	Fatty acid metabolism	Primary bile acid biosynthesis	0.0416667
133	Fatty acid degradation	Synthesis and degradation of ketone bodies	0.0416667
240	Carbon metabolism	Glycolysis / Gluconeogenesis	0.0416667
32	Fatty acid metabolism	Glyoxylate and dicarboxylate metabolism	0.04
81	Valine, leucine and isoleucine degradation	alpha-Linolenic acid metabolism	0.04
173	Butanoate metabolism	PPAR signaling pathway	0.04
495	Arginine and proline metabolism	Glutathione metabolism	0.04
282	Metabolic pathways	Biosynthesis of unsaturated fatty acids	0.0393258
294	Metabolic pathways	Glycine, serine and threonine metabolism	0.0393258
296	Metabolic pathways	Alanine, aspartate and glutamate metabolism	0.0393258
302	Metabolic pathways	Glyoxylate and dicarboxylate metabolism	0.0393258
35	Fatty acid metabolism	Pyruvate metabolism	0.0384615
47	Lysine degradation	PPAR signaling pathway	0.037037
79	Valine, leucine and isoleucine degradation	Biosynthesis of unsaturated fatty acids	0.037037
209	beta-Alanine metabolism	Glutathione metabolism	0.037037
273	Tryptophan metabolism	Metabolism of xenobiotics by cytochrome P450	0.037037
353	Peroxisome	Synthesis and degradation of ketone bodies	0.037037
131	Fatty acid degradation	Glyoxylate and dicarboxylate metabolism	0.0357143
244	Carbon metabolism	Glycerolipid metabolism	0.0344828
257	Tryptophan metabolism	PPAR signaling pathway	0.0344828
497	Arginine and proline metabolism	Phagosome	0.0344828
287	Metabolic pathways	Galactose metabolism	0.0337079
291	Metabolic pathways	Primary bile acid biosynthesis	0.0337079
295	Metabolic pathways	Mannose type O-glycan biosynthesis	0.0337079
343	Peroxisome	Glycine, serine and threonine metabolism	0.0322581
347	Peroxisome	Retinol metabolism	0.0322581
351	Peroxisome	Glyoxylate and dicarboxylate metabolism	0.0322581
350	Peroxisome	Drug metabolism - cytochrome P450	0.030303
284	Metabolic pathways	alpha-Linolenic acid metabolism	0.0280899
298	Metabolic pathways	Retinol metabolism	0.0277778
45	Lysine degradation	Peroxisome	0.027027
338	Peroxisome	Arginine and proline metabolism	0.027027
339	Peroxisome	Glutathione metabolism	0.027027
348	Peroxisome	Metabolism of xenobiotics by cytochrome P450	0.027027
304	Metabolic pathways	Synthesis and degradation of ketone bodies	0.0168539
292	Metabolic pathways	Phagosome	0.015625
