# Supplementary material for: Transcriptome Analysis Reveals the Molecular Basis of Overfeeding-Induced Diabetes in Zebrafish
Source: Int J Mol Sci. 2023 Jul 26;24(15):11994. doi: 10.3390/ijms241511994 (PMC10418320; doi:10.3390/ijms241511994)
Supplement: Supplementary file 1 [file ijms-24-11994-s001.zip › Supplementary Table S4_GO enrichment analysis results of DEGs.xlsx]

## Sheet: up-regulated
GO enrichment analysis results for up-regulated DEGs in liver after overfeeding
Term	Database	ID	Input number	Background number	P-Value	Corrected P-Value	Input	Hyperlink	Representative	Class
antigen processing and presentation of endogenous peptide antigen via MHC class I	Gene Ontology	GO:0019885	3	7	0.0107077	0.159031	ENSDARG00000079402|ENSDARG00000013024|ENSDARG00000076483	http://amigo.geneontology.org/amigo/term/GO:0019885	antigen processing and presentation of endogenous peptide antigen via MHC class I	BP
apoptotic signaling pathway	Gene Ontology	GO:0097190	6	17	0.000904508	0.026609	ENSDARG00000074754|ENSDARG00000086842|ENSDARG00000092895|ENSDARG00000017489|ENSDARG00000075151|ENSDARG00000078389	http://amigo.geneontology.org/amigo/term/GO:0097190	apoptotic signaling pathway	BP
cardiac muscle cell proliferation	Gene Ontology	GO:0060038	3	12	0.0427876	0.348161	ENSDARG00000103747|ENSDARG00000104393|ENSDARG00000103937	http://amigo.geneontology.org/amigo/term/GO:0060038	cardiac muscle cell proliferation	BP
caveola assembly	Gene Ontology	GO:0070836	3	6	0.0070664	0.116234	ENSDARG00000103747|ENSDARG00000078014|ENSDARG00000052000	http://amigo.geneontology.org/amigo/term/GO:0070836	caveola assembly	BP
protein-containing complex assembly	Gene Ontology	GO:0065003	4	16	0.0203868	0.243646	ENSDARG00000099732|ENSDARG00000036482|ENSDARG00000021973|ENSDARG00000041430	http://amigo.geneontology.org/amigo/term/GO:0065003	caveola assembly	BP
cellular aldehyde metabolic process	Gene Ontology	GO:0006081	3	8	0.0152547	0.20292	ENSDARG00000069100|ENSDARG00000037061|ENSDARG00000089924	http://amigo.geneontology.org/amigo/term/GO:0006081	cellular aldehyde metabolic process	BP
cellular response to estrogen stimulus	Gene Ontology	GO:0071391	8	31	0.00102045	0.0289081	ENSDARG00000037000|ENSDARG00000055809|ENSDARG00000016825|ENSDARG00000016448|ENSDARG00000076223|ENSDARG00000092233|ENSDARG00000078429|ENSDARG00000069980	http://amigo.geneontology.org/amigo/term/GO:0071391	cellular response to estrogen stimulus	BP
cellular response to xenobiotic stimulus	Gene Ontology	GO:0071466	7	30	0.00358495	0.0772403	ENSDARG00000034852|ENSDARG00000098315|ENSDARG00000056252|ENSDARG00000091211|ENSDARG00000071586|ENSDARG00000098589|ENSDARG00000104068	http://amigo.geneontology.org/amigo/term/GO:0071466	cellular response to estrogen stimulus	BP
response to estradiol	Gene Ontology	GO:0032355	5	22	0.0144109	0.202247	ENSDARG00000016825|ENSDARG00000078429|ENSDARG00000092233|ENSDARG00000016448|ENSDARG00000055809	http://amigo.geneontology.org/amigo/term/GO:0032355	cellular response to estrogen stimulus	BP
insulin receptor signaling pathway	Gene Ontology	GO:0008286	5	27	0.0311376	0.324032	ENSDARG00000103038|ENSDARG00000023058|ENSDARG00000052000|ENSDARG00000038524|ENSDARG00000018060	http://amigo.geneontology.org/amigo/term/GO:0008286	cellular response to estrogen stimulus	BP
chaperone-mediated protein folding	Gene Ontology	GO:0061077	4	12	0.00785954	0.126559	ENSDARG00000021973|ENSDARG00000055856|ENSDARG00000052625|ENSDARG00000008447	http://amigo.geneontology.org/amigo/term/GO:0061077	chaperone-mediated protein folding	BP
chaperone cofactor-dependent protein refolding	Gene Ontology	GO:0051085	5	25	0.0234475	0.265695	ENSDARG00000004187|ENSDARG00000021973|ENSDARG00000012381|ENSDARG00000055856|ENSDARG00000037403	http://amigo.geneontology.org/amigo/term/GO:0051085	chaperone-mediated protein folding	BP
circadian rhythm	Gene Ontology	GO:0007623	5	28	0.0355102	0.347937	ENSDARG00000011703|ENSDARG00000094965|ENSDARG00000041381|ENSDARG00000056949|ENSDARG00000006791	http://amigo.geneontology.org/amigo/term/GO:0007623	circadian rhythm	BP
embryonic hemopoiesis	Gene Ontology	GO:0035162	8	37	0.00302421	0.0667919	ENSDARG00000004427|ENSDARG00000030490|ENSDARG00000101322|ENSDARG00000038643|ENSDARG00000012881|ENSDARG00000029019|ENSDARG00000103320|ENSDARG00000013477	http://amigo.geneontology.org/amigo/term/GO:0035162	embryonic hemopoiesis	BP
primitive erythrocyte differentiation	Gene Ontology	GO:0060319	5	19	0.00806921	0.128582	ENSDARG00000026655|ENSDARG00000018691|ENSDARG00000012776|ENSDARG00000017400|ENSDARG00000056929	http://amigo.geneontology.org/amigo/term/GO:0060319	embryonic hemopoiesis	BP
muscle fiber development	Gene Ontology	GO:0048747	5	22	0.0144109	0.202247	ENSDARG00000018460|ENSDARG00000077583|ENSDARG00000046133|ENSDARG00000071586|ENSDARG00000059437	http://amigo.geneontology.org/amigo/term/GO:0048747	embryonic hemopoiesis	BP
otic vesicle morphogenesis	Gene Ontology	GO:0071600	3	10	0.0271524	0.290464	ENSDARG00000020606|ENSDARG00000014259|ENSDARG00000054250	http://amigo.geneontology.org/amigo/term/GO:0071600	embryonic hemopoiesis	BP
fatty acid beta-oxidation	Gene Ontology	GO:0006635	12	23	5.28e-08	8.97e-06	ENSDARG00000038881|ENSDARG00000045888|ENSDARG00000018002|ENSDARG00000102055|ENSDARG00000004687|ENSDARG00000038900|ENSDARG00000014727|ENSDARG00000104085|ENSDARG00000057128|ENSDARG00000038618|ENSDARG00000001578|ENSDARG00000070029	http://amigo.geneontology.org/amigo/term/GO:0006635	fatty acid beta-oxidation	BP
hydrogen peroxide catabolic process	Gene Ontology	GO:0042744	10	20	9.8e-07	9.99e-05	ENSDARG00000018146|ENSDARG00000097238|ENSDARG00000025350|ENSDARG00000069735|ENSDARG00000069734|ENSDARG00000045144|ENSDARG00000079078|ENSDARG00000104702|ENSDARG00000097011|ENSDARG00000089087	http://amigo.geneontology.org/amigo/term/GO:0042744	fatty acid beta-oxidation	BP
fatty acid metabolic process	Gene Ontology	GO:0006631	13	73	0.00108212	0.0300976	ENSDARG00000004402|ENSDARG00000045888|ENSDARG00000074169|ENSDARG00000042122|ENSDARG00000061201|ENSDARG00000014806|ENSDARG00000014727|ENSDARG00000017126|ENSDARG00000070029|ENSDARG00000030765|ENSDARG00000038618|ENSDARG00000057128|ENSDARG00000019532	http://amigo.geneontology.org/amigo/term/GO:0006631	fatty acid beta-oxidation	BP
fatty acid alpha-oxidation	Gene Ontology	GO:0001561	3	5	0.00428612	0.0789962	ENSDARG00000017126|ENSDARG00000020529|ENSDARG00000086740	http://amigo.geneontology.org/amigo/term/GO:0001561	fatty acid beta-oxidation	BP
DNA catabolic process	Gene Ontology	GO:0006308	3	5	0.00428612	0.0789962	ENSDARG00000023861|ENSDARG00000005464|ENSDARG00000011376	http://amigo.geneontology.org/amigo/term/GO:0006308	fatty acid beta-oxidation	BP
triglyceride metabolic process	Gene Ontology	GO:0006641	3	5	0.00428612	0.0789962	ENSDARG00000092170|ENSDARG00000030872|ENSDARG00000062864	http://amigo.geneontology.org/amigo/term/GO:0006641	fatty acid beta-oxidation	BP
carboxylic acid metabolic process	Gene Ontology	GO:0019752	5	17	0.00515308	0.0927402	ENSDARG00000026348|ENSDARG00000027419|ENSDARG00000071076|ENSDARG00000075454|ENSDARG00000015537	http://amigo.geneontology.org/amigo/term/GO:0019752	fatty acid beta-oxidation	BP
CDP-diacylglycerol biosynthetic process	Gene Ontology	GO:0016024	3	7	0.0107077	0.159031	ENSDARG00000016048|ENSDARG00000074169|ENSDARG00000103320	http://amigo.geneontology.org/amigo/term/GO:0016024	fatty acid beta-oxidation	BP
DNA catabolic process, endonucleolytic	Gene Ontology	GO:0000737	3	8	0.0152547	0.20292	ENSDARG00000023861|ENSDARG00000005464|ENSDARG00000011376	http://amigo.geneontology.org/amigo/term/GO:0000737	fatty acid beta-oxidation	BP
retinol metabolic process	Gene Ontology	GO:0042572	4	15	0.0165426	0.209141	ENSDARG00000019260|ENSDARG00000018600|ENSDARG00000104660|ENSDARG00000058730	http://amigo.geneontology.org/amigo/term/GO:0042572	fatty acid beta-oxidation	BP
phospholipid catabolic process	Gene Ontology	GO:0009395	3	10	0.0271524	0.290464	ENSDARG00000033355|ENSDARG00000068763|ENSDARG00000042090	http://amigo.geneontology.org/amigo/term/GO:0009395	fatty acid beta-oxidation	BP
glycerophospholipid catabolic process	Gene Ontology	GO:0046475	3	12	0.0427876	0.348161	ENSDARG00000033355|ENSDARG00000074466|ENSDARG00000042090	http://amigo.geneontology.org/amigo/term/GO:0046475	fatty acid beta-oxidation	BP
lipid catabolic process	Gene Ontology	GO:0016042	8	62	0.0486237	0.383413	ENSDARG00000015765|ENSDARG00000015662|ENSDARG00000033355|ENSDARG00000114245|ENSDARG00000042090|ENSDARG00000068763|ENSDARG00000102176|ENSDARG00000008457	http://amigo.geneontology.org/amigo/term/GO:0016042	fatty acid beta-oxidation	BP
glutathione metabolic process	Gene Ontology	GO:0006749	11	17	2.25e-08	4.92e-06	ENSDARG00000042533|ENSDARG00000056510|ENSDARG00000045123|ENSDARG00000017388|ENSDARG00000018146|ENSDARG00000092052|ENSDARG00000042428|ENSDARG00000104068|ENSDARG00000027984|ENSDARG00000095464|ENSDARG00000029473	http://amigo.geneontology.org/amigo/term/GO:0006749	glutathione metabolic process	BP
immune system process	Gene Ontology	GO:0002376	8	61	0.0450277	0.362532	ENSDARG00000025436|ENSDARG00000016457|ENSDARG00000045681|ENSDARG00000004952|ENSDARG00000056378|ENSDARG00000008153|ENSDARG00000053136|ENSDARG00000027658	http://amigo.geneontology.org/amigo/term/GO:0002376	immune system process	BP
lipid metabolic process	Gene Ontology	GO:0006629	28	227	0.000998295	0.028814	ENSDARG00000045888|ENSDARG00000030872|ENSDARG00000074169|ENSDARG00000061201|ENSDARG00000014806|ENSDARG00000025904|ENSDARG00000042090|ENSDARG00000008153|ENSDARG00000038618|ENSDARG00000068763|ENSDARG00000004402|ENSDARG00000074466|ENSDARG00000103253|ENSDARG00000021991|ENSDARG00000021220|ENSDARG00000042658|ENSDARG00000008457|ENSDARG00000070029|ENSDARG00000102176|ENSDARG00000017126|ENSDARG00000015765|…	http://amigo.geneontology.org/amigo/term/GO:0006629	lipid metabolic process	BP
lipid transport	Gene Ontology	GO:0006869	17	75	1.11e-05	0.000852184	ENSDARG00000030872|ENSDARG00000053487|ENSDARG00000040027|ENSDARG00000073718|ENSDARG00000016825|ENSDARG00000030630|ENSDARG00000074041|ENSDARG00000016448|ENSDARG00000092233|ENSDARG00000078429|ENSDARG00000035909|ENSDARG00000042780|ENSDARG00000076002|ENSDARG00000013830|ENSDARG00000034714|ENSDARG00000040295|ENSDARG00000055809	http://amigo.geneontology.org/amigo/term/GO:0006869	lipid transport	BP
organic substance transport	Gene Ontology	GO:0071702	3	6	0.0070664	0.116234	ENSDARG00000030630|ENSDARG00000075375|ENSDARG00000035909	http://amigo.geneontology.org/amigo/term/GO:0071702	lipid transport	BP
carbohydrate transport	Gene Ontology	GO:0008643	4	20	0.0407978	0.347937	ENSDARG00000015158|ENSDARG00000030630|ENSDARG00000075375|ENSDARG00000035909	http://amigo.geneontology.org/amigo/term/GO:0008643	lipid transport	BP
mesodermal cell migration	Gene Ontology	GO:0008078	3	12	0.0427876	0.348161	ENSDARG00000036670|ENSDARG00000016350|ENSDARG00000053279	http://amigo.geneontology.org/amigo/term/GO:0008078	mesodermal cell migration	BP
mitochondrial electron transport, cytochrome c to oxygen	Gene Ontology	GO:0006123	3	12	0.0427876	0.348161	ENSDARG00000068738|ENSDARG00000022509|ENSDARG00000054588	http://amigo.geneontology.org/amigo/term/GO:0006123	mitochondrial electron transport, cytochrome c to oxygen	BP
ion homeostasis	Gene Ontology	GO:0050801	4	10	0.0041869	0.0789962	ENSDARG00000025032|ENSDARG00000088967|ENSDARG00000101778|ENSDARG00000104989	http://amigo.geneontology.org/amigo/term/GO:0050801	monoatomic ion homeostasis	BP
triglyceride homeostasis	Gene Ontology	GO:0070328	3	10	0.0271524	0.290464	ENSDARG00000027978|ENSDARG00000030872|ENSDARG00000015662	http://amigo.geneontology.org/amigo/term/GO:0070328	monoatomic ion homeostasis	BP
myelination	Gene Ontology	GO:0042552	5	28	0.0355102	0.347937	ENSDARG00000020493|ENSDARG00000008153|ENSDARG00000061099|ENSDARG00000095675|ENSDARG00000062711	http://amigo.geneontology.org/amigo/term/GO:0042552	myelination	BP
negative regulation of transforming growth factor beta receptor signaling pathway	Gene Ontology	GO:0030512	4	15	0.0165426	0.209141	ENSDARG00000070555|ENSDARG00000039325|ENSDARG00000055381|ENSDARG00000042151	http://amigo.geneontology.org/amigo/term/GO:0030512	negative regulation of transforming growth factor beta receptor signaling pathway	BP
regulation of vascular endothelial growth factor receptor signaling pathway	Gene Ontology	GO:0030947	3	12	0.0427876	0.348161	ENSDARG00000031915|ENSDARG00000096546|ENSDARG00000104453	http://amigo.geneontology.org/amigo/term/GO:0030947	negative regulation of transforming growth factor beta receptor signaling pathway	BP
oxygen transport	Gene Ontology	GO:0015671	6	17	0.000904508	0.026609	ENSDARG00000069735|ENSDARG00000069734|ENSDARG00000045144|ENSDARG00000079078|ENSDARG00000097011|ENSDARG00000089087	http://amigo.geneontology.org/amigo/term/GO:0015671	oxygen transport	BP
peroxisome organization	Gene Ontology	GO:0007031	3	9	0.020733	0.243972	ENSDARG00000104085|ENSDARG00000013973|ENSDARG00000098904	http://amigo.geneontology.org/amigo/term/GO:0007031	peroxisome organization	BP
photoperiodism	Gene Ontology	GO:0009648	4	11	0.00583212	0.10374	ENSDARG00000011703|ENSDARG00000006791|ENSDARG00000035732|ENSDARG00000041381	http://amigo.geneontology.org/amigo/term/GO:0009648	photoperiodism	BP
response to light stimulus	Gene Ontology	GO:0009416	5	28	0.0355102	0.347937	ENSDARG00000011703|ENSDARG00000006791|ENSDARG00000093864|ENSDARG00000075454|ENSDARG00000041381	http://amigo.geneontology.org/amigo/term/GO:0009416	photoperiodism	BP
positive regulation of stress fiber assembly	Gene Ontology	GO:0051496	3	10	0.0271524	0.290464	ENSDARG00000088630|ENSDARG00000077788|ENSDARG00000103467	http://amigo.geneontology.org/amigo/term/GO:0051496	positive regulation of stress fiber assembly	BP
protein O-linked mannosylation	Gene Ontology	GO:0035269	3	12	0.0427876	0.348161	ENSDARG00000017058|ENSDARG00000063414|ENSDARG00000077583	http://amigo.geneontology.org/amigo/term/GO:0035269	protein O-linked mannosylation	BP
regulation of neuron apoptotic process	Gene Ontology	GO:0043523	3	9	0.020733	0.243972	ENSDARG00000023058|ENSDARG00000116835|ENSDARG00000018691	http://amigo.geneontology.org/amigo/term/GO:0043523	regulation of neuron apoptotic process	BP
regulation of phosphatidylinositol 3-kinase activity	Gene Ontology	GO:0043551	3	5	0.00428612	0.0789962	ENSDARG00000103038|ENSDARG00000018060|ENSDARG00000038524	http://amigo.geneontology.org/amigo/term/GO:0043551	regulation of phosphatidylinositol 3-kinase activity	BP
regulation of catalytic activity	Gene Ontology	GO:0050790	3	8	0.0152547	0.20292	ENSDARG00000044183|ENSDARG00000101051|ENSDARG00000000369	http://amigo.geneontology.org/amigo/term/GO:0050790	regulation of phosphatidylinositol 4-kinase activity	BP
regulation of synaptic vesicle exocytosis	Gene Ontology	GO:2000300	4	8	0.0018953	0.0483223	ENSDARG00000101606|ENSDARG00000055115|ENSDARG00000062382|ENSDARG00000078902	http://amigo.geneontology.org/amigo/term/GO:2000300	regulation of synaptic vesicle exocytosis	BP
positive regulation of synaptic transmission	Gene Ontology	GO:0050806	4	9	0.00288769	0.0659318	ENSDARG00000101606|ENSDARG00000073883|ENSDARG00000078902|ENSDARG00000031720	http://amigo.geneontology.org/amigo/term/GO:0050806	regulation of synaptic vesicle exocytosis	BP
regulation of exocytosis	Gene Ontology	GO:0017157	5	30	0.0453404	0.363138	ENSDARG00000045463|ENSDARG00000101606|ENSDARG00000105271|ENSDARG00000026484|ENSDARG00000078902	http://amigo.geneontology.org/amigo/term/GO:0017157	regulation of synaptic vesicle exocytosis	BP
response to oxidative stress	Gene Ontology	GO:0006979	6	37	0.0334403	0.345644	ENSDARG00000025350|ENSDARG00000018459|ENSDARG00000018146|ENSDARG00000013302|ENSDARG00000104702|ENSDARG00000116835	http://amigo.geneontology.org/amigo/term/GO:0006979	response to oxidative stress	BP
tetrapyrrole biosynthetic process	Gene Ontology	GO:0033014	3	6	0.0070664	0.116234	ENSDARG00000038643|ENSDARG00000100372|ENSDARG00000008840	http://amigo.geneontology.org/amigo/term/GO:0033014	tetrapyrrole biosynthetic process	BP
heme biosynthetic process	Gene Ontology	GO:0006783	4	18	0.029495	0.30904	ENSDARG00000038643|ENSDARG00000100372|ENSDARG00000008840|ENSDARG00000063446	http://amigo.geneontology.org/amigo/term/GO:0006783	tetrapyrrole biosynthetic process	BP
mitochondrion	Gene Ontology	GO:0005739	77	708	7.38e-06	0.00062718	ENSDARG00000114237|ENSDARG00000045888|ENSDARG00000043848|ENSDARG00000016687|ENSDARG00000074754|ENSDARG00000042881|ENSDARG00000061201|ENSDARG00000102055|ENSDARG00000033802|ENSDARG00000038618|ENSDARG00000074169|ENSDARG00000038207|ENSDARG00000038076|ENSDARG00000075151|ENSDARG00000016904|ENSDARG00000090195|ENSDARG00000001578|ENSDARG00000018146|ENSDARG00000017489|ENSDARG00000032431|ENSDARG00000024478|…	http://amigo.geneontology.org/amigo/term/GO:0005739	mitochondrion	CC
haptoglobin-hemoglobin complex	Gene Ontology	GO:0031838	7	14	4.15e-05	0.00209441	ENSDARG00000097238|ENSDARG00000069735|ENSDARG00000069734|ENSDARG00000045144|ENSDARG00000079078|ENSDARG00000097011|ENSDARG00000089087	http://amigo.geneontology.org/amigo/term/GO:0031838	haptoglobin-hemoglobin complex	CC
hemoglobin complex	Gene Ontology	GO:0005833	7	14	4.15e-05	0.00209441	ENSDARG00000097238|ENSDARG00000069735|ENSDARG00000069734|ENSDARG00000045144|ENSDARG00000079078|ENSDARG00000097011|ENSDARG00000089087	http://amigo.geneontology.org/amigo/term/GO:0005833	hemoglobin complex	CC
peroxisome	Gene Ontology	GO:0005777	14	61	5.63e-05	0.00269263	ENSDARG00000043848|ENSDARG00000020529|ENSDARG00000104085|ENSDARG00000040352|ENSDARG00000056510|ENSDARG00000004687|ENSDARG00000040248|ENSDARG00000014727|ENSDARG00000092052|ENSDARG00000070029|ENSDARG00000002523|ENSDARG00000104702|ENSDARG00000100719|ENSDARG00000098904	http://amigo.geneontology.org/amigo/term/GO:0005777	peroxisome	CC
cytosol	Gene Ontology	GO:0005829	83	832	6.54e-05	0.00303119	ENSDARG00000038228|ENSDARG00000043848|ENSDARG00000098588|ENSDARG00000117133|ENSDARG00000054048|ENSDARG00000025350|ENSDARG00000012381|ENSDARG00000096415|ENSDARG00000042090|ENSDARG00000008098|ENSDARG00000007467|ENSDARG00000099106|ENSDARG00000054771|ENSDARG00000045123|ENSDARG00000068910|ENSDARG00000027572|ENSDARG00000030786|ENSDARG00000057032|ENSDARG00000021702|ENSDARG00000111714|ENSDARG00000001950|…	http://amigo.geneontology.org/amigo/term/GO:0005829	cytosol	CC
mitochondrial matrix	Gene Ontology	GO:0005759	11	62	0.00259901	0.0631084	ENSDARG00000101631|ENSDARG00000104732|ENSDARG00000038643|ENSDARG00000077193|ENSDARG00000038207|ENSDARG00000099791|ENSDARG00000016904|ENSDARG00000058102|ENSDARG00000011122|ENSDARG00000086107|ENSDARG00000063446	http://amigo.geneontology.org/amigo/term/GO:0005759	mitochondrial matrix	CC
cellular component	Gene Ontology	GO:0005575	86	997	0.00367877	0.078161	ENSDARG00000004141|ENSDARG00000036811|ENSDARG00000029242|ENSDARG00000029856|ENSDARG00000030632|ENSDARG00000022378|ENSDARG00000102412|ENSDARG00000099833|ENSDARG00000025855|ENSDARG00000058725|ENSDARG00000101205|ENSDARG00000078911|ENSDARG00000104864|ENSDARG00000031299|ENSDARG00000105412|ENSDARG00000104654|ENSDARG00000008155|ENSDARG00000070898|ENSDARG00000058394|ENSDARG00000061946|ENSDARG00000102846|…	http://amigo.geneontology.org/amigo/term/GO:0005575	cellular_component	CC
endoplasmic reticulum-Golgi intermediate compartment	Gene Ontology	GO:0005793	7	32	0.00505773	0.0921077	ENSDARG00000028816|ENSDARG00000069980|ENSDARG00000004115|ENSDARG00000063330|ENSDARG00000100435|ENSDARG00000036291|ENSDARG00000039892	http://amigo.geneontology.org/amigo/term/GO:0005793	endoplasmic reticulum-Golgi intermediate compartment	CC
very-low-density lipoprotein particle	Gene Ontology	GO:0034361	3	6	0.0070664	0.116234	ENSDARG00000092170|ENSDARG00000040295|ENSDARG00000042780	http://amigo.geneontology.org/amigo/term/GO:0034361	very-low-density lipoprotein particle	CC
eukaryotic translation initiation factor 4F complex	Gene Ontology	GO:0016281	4	13	0.0103018	0.157592	ENSDARG00000038585|ENSDARG00000005078|ENSDARG00000013274|ENSDARG00000014565	http://amigo.geneontology.org/amigo/term/GO:0016281	eukaryotic translation initiation factor 4F complex	CC
high-density lipoprotein particle	Gene Ontology	GO:0034364	3	7	0.0107077	0.159031	ENSDARG00000092170|ENSDARG00000030872|ENSDARG00000040295	http://amigo.geneontology.org/amigo/term/GO:0034364	very-low-density lipoprotein particle	CC
endoplasmic reticulum	Gene Ontology	GO:0005783	51	579	0.0154335	0.203529	ENSDARG00000006487|ENSDARG00000035763|ENSDARG00000018600|ENSDARG00000010085|ENSDARG00000071212|ENSDARG00000055945|ENSDARG00000103915|ENSDARG00000036636|ENSDARG00000056226|ENSDARG00000102744|ENSDARG00000004402|ENSDARG00000062955|ENSDARG00000058730|ENSDARG00000025595|ENSDARG00000055115|ENSDARG00000021991|ENSDARG00000063330|ENSDARG00000005799|ENSDARG00000046133|ENSDARG00000076296|ENSDARG00000100435|…	http://amigo.geneontology.org/amigo/term/GO:0005783	endoplasmic reticulum	CC
endoplasmic reticulum membrane	Gene Ontology	GO:0005789	29	293	0.0158448	0.205411	ENSDARG00000035763|ENSDARG00000018600|ENSDARG00000103915|ENSDARG00000056226|ENSDARG00000074466|ENSDARG00000025595|ENSDARG00000069980|ENSDARG00000021991|ENSDARG00000023820|ENSDARG00000076296|ENSDARG00000100435|ENSDARG00000035909|ENSDARG00000013024|ENSDARG00000040912|ENSDARG00000062955|ENSDARG00000017126|ENSDARG00000030630|ENSDARG00000004952|ENSDARG00000076223|ENSDARG00000025859|ENSDARG00000092071|…	http://amigo.geneontology.org/amigo/term/GO:0005789	endoplasmic reticulum	CC
lysosome	Gene Ontology	GO:0005764	16	153	0.0408624	0.347937	ENSDARG00000020475|ENSDARG00000103391|ENSDARG00000036940|ENSDARG00000099376|ENSDARG00000006279|ENSDARG00000005679|ENSDARG00000102387|ENSDARG00000071339|ENSDARG00000019033|ENSDARG00000013771|ENSDARG00000045542|ENSDARG00000043081|ENSDARG00000103498|ENSDARG00000035663|ENSDARG00000056378|ENSDARG00000101051	http://amigo.geneontology.org/amigo/term/GO:0005764	lysosome	CC
cytoplasm	Gene Ontology	GO:0005737	231	3250	0.0444385	0.359681	ENSDARG00000011703|ENSDARG00000078473|ENSDARG00000007975|ENSDARG00000039130|ENSDARG00000060601|ENSDARG00000078504|ENSDARG00000099106|ENSDARG00000041381|ENSDARG00000095464|ENSDARG00000099524|ENSDARG00000017388|ENSDARG00000028088|ENSDARG00000055151|ENSDARG00000074684|ENSDARG00000062382|ENSDARG00000008447|ENSDARG00000053066|ENSDARG00000037555|ENSDARG00000069425|ENSDARG00000031915|ENSDARG00000042428|…	http://amigo.geneontology.org/amigo/term/GO:0005737	cytoplasm	CC
oxidoreductase activity	Gene Ontology	GO:0016491	95	526	9.62e-19	1.47e-15	ENSDARG00000043848|ENSDARG00000016687|ENSDARG00000018600|ENSDARG00000025904|ENSDARG00000023820|ENSDARG00000076904|ENSDARG00000055159|ENSDARG00000019838|ENSDARG00000061629|ENSDARG00000002523|ENSDARG00000031915|ENSDARG00000002249|ENSDARG00000071076|ENSDARG00000028048|ENSDARG00000019532|ENSDARG00000059231|ENSDARG00000058725|ENSDARG00000045015|ENSDARG00000057378|ENSDARG00000100304|ENSDARG00000031299|…	http://amigo.geneontology.org/amigo/term/GO:0016491	oxidoreductase activity	MF
catalytic activity	Gene Ontology	GO:0003824	61	450	7.72e-08	1.15e-05	ENSDARG00000060927|ENSDARG00000045888|ENSDARG00000025513|ENSDARG00000013371|ENSDARG00000007421|ENSDARG00000014068|ENSDARG00000061201|ENSDARG00000038876|ENSDARG00000004687|ENSDARG00000103811|ENSDARG00000057032|ENSDARG00000021220|ENSDARG00000001578|ENSDARG00000070029|ENSDARG00000027419|ENSDARG00000057630|ENSDARG00000009771|ENSDARG00000020493|ENSDARG00000018266|ENSDARG00000033361|ENSDARG00000089641|…	http://amigo.geneontology.org/amigo/term/GO:0003824	catalytic activity	MF
glutathione transferase activity	Gene Ontology	GO:0004364	12	24	8.3e-08	1.15e-05	ENSDARG00000042533|ENSDARG00000013741|ENSDARG00000027984|ENSDARG00000056510|ENSDARG00000029473|ENSDARG00000042620|ENSDARG00000095464|ENSDARG00000092052|ENSDARG00000042428|ENSDARG00000104068|ENSDARG00000102744|ENSDARG00000017388	http://amigo.geneontology.org/amigo/term/GO:0004364	glutathione transferase activity	MF
heme binding	Gene Ontology	GO:0020037	27	154	4.36e-06	0.000392058	ENSDARG00000045144|ENSDARG00000074638|ENSDARG00000033802|ENSDARG00000042630|ENSDARG00000068910|ENSDARG00000098589|ENSDARG00000042978|ENSDARG00000101008|ENSDARG00000097011|ENSDARG00000098315|ENSDARG00000055159|ENSDARG00000053966|ENSDARG00000026548|ENSDARG00000002249|ENSDARG00000089087|ENSDARG00000035564|ENSDARG00000069735|ENSDARG00000069734|ENSDARG00000057262|ENSDARG00000097238|ENSDARG00000056587|…	http://amigo.geneontology.org/amigo/term/GO:0020037	heme binding	MF
acyl-CoA dehydrogenase activity	Gene Ontology	GO:0003995	7	11	9.05e-06	0.000728405	ENSDARG00000016687|ENSDARG00000088357|ENSDARG00000038900|ENSDARG00000042658|ENSDARG00000027009|ENSDARG00000098831|ENSDARG00000030781	http://amigo.geneontology.org/amigo/term/GO:0003995	acyl-CoA dehydrogenase activity	MF
peroxidase activity	Gene Ontology	GO:0004601	11	35	2.24e-05	0.00148839	ENSDARG00000018146|ENSDARG00000097238|ENSDARG00000025350|ENSDARG00000069735|ENSDARG00000069734|ENSDARG00000045144|ENSDARG00000079078|ENSDARG00000104702|ENSDARG00000097011|ENSDARG00000089087|ENSDARG00000013302	http://amigo.geneontology.org/amigo/term/GO:0004601	acyl-CoA dehydrogenase activity	MF
flavin adenine dinucleotide binding	Gene Ontology	GO:0050660	14	58	3.31e-05	0.00209441	ENSDARG00000101631|ENSDARG00000017126|ENSDARG00000016687|ENSDARG00000100304|ENSDARG00000042658|ENSDARG00000043518|ENSDARG00000045411|ENSDARG00000038900|ENSDARG00000014727|ENSDARG00000068910|ENSDARG00000088357|ENSDARG00000027009|ENSDARG00000098831|ENSDARG00000030781	http://amigo.geneontology.org/amigo/term/GO:0050660	flavin adenine dinucleotide binding	MF
haptoglobin binding	Gene Ontology	GO:0031720	7	14	4.15e-05	0.00209441	ENSDARG00000097238|ENSDARG00000069735|ENSDARG00000069734|ENSDARG00000045144|ENSDARG00000079078|ENSDARG00000097011|ENSDARG00000089087	http://amigo.geneontology.org/amigo/term/GO:0031720	haptoglobin binding	MF
organic acid binding	Gene Ontology	GO:0043177	7	14	4.15e-05	0.00209441	ENSDARG00000097238|ENSDARG00000069735|ENSDARG00000069734|ENSDARG00000045144|ENSDARG00000079078|ENSDARG00000097011|ENSDARG00000089087	http://amigo.geneontology.org/amigo/term/GO:0043177	organic acid binding	MF
iron ion binding	Gene Ontology	GO:0005506	26	166	4.24e-05	0.00209441	ENSDARG00000010085|ENSDARG00000071212|ENSDARG00000033802|ENSDARG00000053966|ENSDARG00000042978|ENSDARG00000045015|ENSDARG00000097011|ENSDARG00000098315|ENSDARG00000007975|ENSDARG00000025595|ENSDARG00000055159|ENSDARG00000023820|ENSDARG00000068125|ENSDARG00000026548|ENSDARG00000038996|ENSDARG00000002249|ENSDARG00000078481|ENSDARG00000069735|ENSDARG00000057262|ENSDARG00000020191|ENSDARG00000056587|…	http://amigo.geneontology.org/amigo/term/GO:0005506	iron ion binding	MF
oxidoreductase activity, acting on the CH-CH group of donors	Gene Ontology	GO:0016627	10	33	7.02e-05	0.00315781	ENSDARG00000016687|ENSDARG00000042658|ENSDARG00000088357|ENSDARG00000025904|ENSDARG00000045411|ENSDARG00000038900|ENSDARG00000014727|ENSDARG00000027009|ENSDARG00000098831|ENSDARG00000030781	http://amigo.geneontology.org/amigo/term/GO:0016627	acyl-CoA dehydrogenase activity	MF
oxygen carrier activity	Gene Ontology	GO:0005344	7	19	0.000265652	0.0101595	ENSDARG00000097238|ENSDARG00000069735|ENSDARG00000069734|ENSDARG00000045144|ENSDARG00000079078|ENSDARG00000097011|ENSDARG00000089087	http://amigo.geneontology.org/amigo/term/GO:0005344	oxygen carrier activity	MF
oxygen binding	Gene Ontology	GO:0019825	7	19	0.000265652	0.0101595	ENSDARG00000097238|ENSDARG00000069735|ENSDARG00000069734|ENSDARG00000045144|ENSDARG00000079078|ENSDARG00000097011|ENSDARG00000089087	http://amigo.geneontology.org/amigo/term/GO:0019825	oxygen binding	MF
lyase activity	Gene Ontology	GO:0016829	19	120	0.000377414	0.0137464	ENSDARG00000027419|ENSDARG00000042881|ENSDARG00000017126|ENSDARG00000100372|ENSDARG00000020529|ENSDARG00000033361|ENSDARG00000014806|ENSDARG00000011166|ENSDARG00000099079|ENSDARG00000070029|ENSDARG00000015537|ENSDARG00000101778|ENSDARG00000026348|ENSDARG00000104393|ENSDARG00000062096|ENSDARG00000021220|ENSDARG00000018944|ENSDARG00000045843|ENSDARG00000075454	http://amigo.geneontology.org/amigo/term/GO:0016829	lyase activity	MF
oxidoreductase activity, acting on paired donors, with incorporation or reduction of molecular oxygen	Gene Ontology	GO:0016705	17	103	0.000475396	0.0169124	ENSDARG00000055159|ENSDARG00000098315|ENSDARG00000002249|ENSDARG00000069186|ENSDARG00000010085|ENSDARG00000078481|ENSDARG00000071212|ENSDARG00000022650|ENSDARG00000033802|ENSDARG00000045015|ENSDARG00000057262|ENSDARG00000026548|ENSDARG00000053966|ENSDARG00000038996|ENSDARG00000042978|ENSDARG00000056587|ENSDARG00000101423	http://amigo.geneontology.org/amigo/term/GO:0016705	acyl-CoA dehydrogenase activity	MF
aldehyde dehydrogenase (NAD+) activity	Gene Ontology	GO:0004029	5	10	0.000522093	0.0181516	ENSDARG00000069100|ENSDARG00000037061|ENSDARG00000089924|ENSDARG00000099154|ENSDARG00000028087	http://amigo.geneontology.org/amigo/term/GO:0004029	acyl-CoA dehydrogenase activity	MF
transferase activity, transferring acyl groups	Gene Ontology	GO:0016746	19	124	0.000556819	0.0189287	ENSDARG00000038881|ENSDARG00000045888|ENSDARG00000092476|ENSDARG00000074169|ENSDARG00000012194|ENSDARG00000057206|ENSDARG00000036549|ENSDARG00000038643|ENSDARG00000102055|ENSDARG00000077193|ENSDARG00000004687|ENSDARG00000040248|ENSDARG00000040352|ENSDARG00000010981|ENSDARG00000103320|ENSDARG00000042551|ENSDARG00000038618|ENSDARG00000016048|ENSDARG00000039892	http://amigo.geneontology.org/amigo/term/GO:0016746	acyltransferase activity	MF
lipid transporter activity	Gene Ontology	GO:0005319	7	22	0.000629997	0.0209508	ENSDARG00000055809|ENSDARG00000016825|ENSDARG00000074041|ENSDARG00000016448|ENSDARG00000092233|ENSDARG00000078429|ENSDARG00000042780	http://amigo.geneontology.org/amigo/term/GO:0005319	lipid transporter activity	MF
acetyl-CoA C-acyltransferase activity	Gene Ontology	GO:0003988	4	6	0.00066306	0.0211315	ENSDARG00000038881|ENSDARG00000045888|ENSDARG00000102055|ENSDARG00000004687	http://amigo.geneontology.org/amigo/term/GO:0003988	acetyl-CoA C-acyltransferase activity	MF
lipid binding	Gene Ontology	GO:0008289	19	127	0.000735842	0.0229725	ENSDARG00000093774|ENSDARG00000042122|ENSDARG00000030872|ENSDARG00000023583|ENSDARG00000053487|ENSDARG00000034883|ENSDARG00000005679|ENSDARG00000073718|ENSDARG00000091101|ENSDARG00000040027|ENSDARG00000021991|ENSDARG00000034714|ENSDARG00000023290|ENSDARG00000018077|ENSDARG00000070038|ENSDARG00000076002|ENSDARG00000013830|ENSDARG00000007697|ENSDARG00000040295	http://amigo.geneontology.org/amigo/term/GO:0008289	lipid binding	MF
oxidoreductase activity, acting on the aldehyde or oxo group of donors, NAD or NADP as acceptor	Gene Ontology	GO:0016620	7	23	0.000814601	0.0249227	ENSDARG00000037061|ENSDARG00000053485|ENSDARG00000089924|ENSDARG00000076544|ENSDARG00000038207|ENSDARG00000069100|ENSDARG00000028087	http://amigo.geneontology.org/amigo/term/GO:0016620	acyl-CoA dehydrogenase activity	MF
enoyl-CoA hydratase activity	Gene Ontology	GO:0004300	4	7	0.00116815	0.0316739	ENSDARG00000057128|ENSDARG00000001578|ENSDARG00000070029|ENSDARG00000018002	http://amigo.geneontology.org/amigo/term/GO:0004300	enoyl-CoA hydratase activity	MF
fatty-acyl-CoA binding	Gene Ontology	GO:0000062	6	18	0.00120091	0.0316739	ENSDARG00000042122|ENSDARG00000102412|ENSDARG00000016687|ENSDARG00000034883|ENSDARG00000094730|ENSDARG00000098831	http://amigo.geneontology.org/amigo/term/GO:0000062	fatty-acyl-CoA binding	MF
RNA 7-methylguanosine cap binding	Gene Ontology	GO:0000340	5	13	0.00165785	0.0429847	ENSDARG00000036375|ENSDARG00000038585|ENSDARG00000005078|ENSDARG00000013274|ENSDARG00000014565	http://amigo.geneontology.org/amigo/term/GO:0000340	RNA 7-methylguanosine cap binding	MF
monooxygenase activity	Gene Ontology	GO:0004497	16	111	0.00265821	0.0635373	ENSDARG00000055159|ENSDARG00000098315|ENSDARG00000002249|ENSDARG00000069186|ENSDARG00000043518|ENSDARG00000022650|ENSDARG00000005560|ENSDARG00000033802|ENSDARG00000045015|ENSDARG00000057262|ENSDARG00000026548|ENSDARG00000053966|ENSDARG00000042978|ENSDARG00000097017|ENSDARG00000056587|ENSDARG00000101423	http://amigo.geneontology.org/amigo/term/GO:0004497	acyl-CoA dehydrogenase activity	MF
metal ion binding	Gene Ontology	GO:0046872	194	2499	0.00276365	0.0650413	ENSDARG00000014825|ENSDARG00000043848|ENSDARG00000007975|ENSDARG00000071467|ENSDARG00000071469|ENSDARG00000005186|ENSDARG00000079613|ENSDARG00000100232|ENSDARG00000051962|ENSDARG00000076904|ENSDARG00000037773|ENSDARG00000055151|ENSDARG00000090679|ENSDARG00000078902|ENSDARG00000079840|ENSDARG00000055159|ENSDARG00000099453|ENSDARG00000027143|ENSDARG00000016763|ENSDARG00000031915|ENSDARG00000035127|…	http://amigo.geneontology.org/amigo/term/GO:0046872	iron ion binding	MF
acylglycerol lipase activity	Gene Ontology	GO:0047372	4	9	0.00288769	0.0659318	ENSDARG00000092071|ENSDARG00000018809|ENSDARG00000036820|ENSDARG00000069828	http://amigo.geneontology.org/amigo/term/GO:0047372	acylglycerol lipase activity	MF
glutathione peroxidase activity	Gene Ontology	GO:0004602	5	15	0.00305634	0.0667919	ENSDARG00000018146|ENSDARG00000102744|ENSDARG00000056510|ENSDARG00000092052|ENSDARG00000013302	http://amigo.geneontology.org/amigo/term/GO:0004602	acyl-CoA dehydrogenase activity	MF
transferase activity, transferring acyl groups other than amino-acyl groups	Gene Ontology	GO:0016747	5	16	0.00400741	0.0789962	ENSDARG00000038881|ENSDARG00000045888|ENSDARG00000012194|ENSDARG00000102055|ENSDARG00000004687	http://amigo.geneontology.org/amigo/term/GO:0016747	acetyl-CoA C-acyltransferase activity	MF
antioxidant activity	Gene Ontology	GO:0016209	5	16	0.00400741	0.0789962	ENSDARG00000057378|ENSDARG00000035136|ENSDARG00000043848|ENSDARG00000025350|ENSDARG00000092233	http://amigo.geneontology.org/amigo/term/GO:0016209	acyl-CoA dehydrogenase activity	MF
hydrolase activity	Gene Ontology	GO:0016787	89	1043	0.00419703	0.0789962	ENSDARG00000099106|ENSDARG00000039130|ENSDARG00000087573|ENSDARG00000051962|ENSDARG00000099824|ENSDARG00000061830|ENSDARG00000058032|ENSDARG00000063419|ENSDARG00000027143|ENSDARG00000102421|ENSDARG00000088764|ENSDARG00000101051|ENSDARG00000045123|ENSDARG00000005525|ENSDARG00000055550|ENSDARG00000042881|ENSDARG00000041776|ENSDARG00000068726|ENSDARG00000019503|ENSDARG00000023861|ENSDARG00000098645|…	http://amigo.geneontology.org/amigo/term/GO:0016787	hydrolase activity	MF
protein-L-isoaspartate (D-aspartate) O-methyltransferase activity	Gene Ontology	GO:0004719	3	5	0.00428612	0.0789962	ENSDARG00000015201|ENSDARG00000053152|ENSDARG00000104883	http://amigo.geneontology.org/amigo/term/GO:0004719	protein-L-isoaspartate (D-aspartate) O-methyltransferase activity	MF
3-hydroxyacyl-CoA dehydrogenase activity	Gene Ontology	GO:0003857	3	5	0.00428612	0.0789962	ENSDARG00000057128|ENSDARG00000070029|ENSDARG00000030765	http://amigo.geneontology.org/amigo/term/GO:0003857	3-hydroxyacyl-CoA dehydrogenase activity	MF
deoxyribonuclease activity	Gene Ontology	GO:0004536	3	6	0.0070664	0.116234	ENSDARG00000023861|ENSDARG00000005464|ENSDARG00000011376	http://amigo.geneontology.org/amigo/term/GO:0004536	acylglycerol lipase activity	MF
deoxyribonuclease I activity	Gene Ontology	GO:0004530	3	6	0.0070664	0.116234	ENSDARG00000023861|ENSDARG00000005464|ENSDARG00000011376	http://amigo.geneontology.org/amigo/term/GO:0004530	acylglycerol lipase activity	MF
carboxylic ester hydrolase activity	Gene Ontology	GO:0052689	6	26	0.00714901	0.116342	ENSDARG00000009771|ENSDARG00000088764|ENSDARG00000019496|ENSDARG00000102234|ENSDARG00000102176|ENSDARG00000020427	http://amigo.geneontology.org/amigo/term/GO:0052689	acylglycerol lipase activity	MF
hydrolase activity, acting on carbon-nitrogen (but not peptide) bonds, in linear amides	Gene Ontology	GO:0016811	4	13	0.0103018	0.157592	ENSDARG00000100719|ENSDARG00000005525|ENSDARG00000099596|ENSDARG00000062096	http://amigo.geneontology.org/amigo/term/GO:0016811	hydrolase activity, acting on carbon-nitrogen (but not peptide) bonds, in linear amides	MF
protein kinase binding	Gene Ontology	GO:0019901	12	87	0.0116847	0.170235	ENSDARG00000103747|ENSDARG00000016868|ENSDARG00000013203|ENSDARG00000070360|ENSDARG00000000369|ENSDARG00000044183|ENSDARG00000068849|ENSDARG00000099833|ENSDARG00000052000|ENSDARG00000030608|ENSDARG00000025855|ENSDARG00000070735	http://amigo.geneontology.org/amigo/term/GO:0019901	protein kinase binding	MF
protein disulfide oxidoreductase activity	Gene Ontology	GO:0015035	5	22	0.0144109	0.202247	ENSDARG00000103915|ENSDARG00000068663|ENSDARG00000092052|ENSDARG00000098075|ENSDARG00000056510	http://amigo.geneontology.org/amigo/term/GO:0015035	acyl-CoA dehydrogenase activity	MF
isomerase activity	Gene Ontology	GO:0016853	12	90	0.0148346	0.20292	ENSDARG00000057630|ENSDARG00000004527|ENSDARG00000014068|ENSDARG00000037000|ENSDARG00000039422|ENSDARG00000030166|ENSDARG00000014015|ENSDARG00000030786|ENSDARG00000068981|ENSDARG00000052625|ENSDARG00000008447|ENSDARG00000070029	http://amigo.geneontology.org/amigo/term/GO:0016853	isomerase activity	MF
thiamine pyrophosphate binding	Gene Ontology	GO:0030976	3	8	0.0152547	0.20292	ENSDARG00000017126|ENSDARG00000020529|ENSDARG00000016415	http://amigo.geneontology.org/amigo/term/GO:0030976	fatty-acyl-CoA binding	MF
1-acylglycerol-3-phosphate O-acyltransferase activity	Gene Ontology	GO:0003841	3	8	0.0152547	0.20292	ENSDARG00000016048|ENSDARG00000103320|ENSDARG00000036549	http://amigo.geneontology.org/amigo/term/GO:0003841	acetyl-CoA C-acyltransferase activity	MF
NAD binding	Gene Ontology	GO:0051287	6	31	0.0158035	0.205411	ENSDARG00000019529|ENSDARG00000029259|ENSDARG00000076544|ENSDARG00000019838|ENSDARG00000043180|ENSDARG00000053215	http://amigo.geneontology.org/amigo/term/GO:0051287	NAD binding	MF
sterol transporter activity	Gene Ontology	GO:0015248	4	15	0.0165426	0.209141	ENSDARG00000076002|ENSDARG00000013830|ENSDARG00000053487|ENSDARG00000040027	http://amigo.geneontology.org/amigo/term/GO:0015248	lipid transporter activity	MF
phosphotransferase activity, alcohol group as acceptor	Gene Ontology	GO:0016773	5	23	0.0171049	0.214476	ENSDARG00000028088|ENSDARG00000002355|ENSDARG00000019877|ENSDARG00000062864|ENSDARG00000074317	http://amigo.geneontology.org/amigo/term/GO:0016773	calmodulin-dependent protein kinase activity	MF
transferase activity	Gene Ontology	GO:0016740	114	1466	0.019134	0.23605	ENSDARG00000078473|ENSDARG00000015201|ENSDARG00000078504|ENSDARG00000102055|ENSDARG00000074169|ENSDARG00000074362|ENSDARG00000017388|ENSDARG00000063414|ENSDARG00000055151|ENSDARG00000017058|ENSDARG00000057942|ENSDARG00000100725|ENSDARG00000042533|ENSDARG00000074665|ENSDARG00000104660|ENSDARG00000045482|ENSDARG00000043648|ENSDARG00000025855|ENSDARG00000061629|ENSDARG00000069998|ENSDARG00000004635|…	http://amigo.geneontology.org/amigo/term/GO:0016740	transferase activity	MF
cytochrome-c oxidase activity	Gene Ontology	GO:0004129	5	24	0.020113	0.243646	ENSDARG00000068738|ENSDARG00000099499|ENSDARG00000069464|ENSDARG00000054588|ENSDARG00000022509	http://amigo.geneontology.org/amigo/term/GO:0004129	acyl-CoA dehydrogenase activity	MF
carboxy-lyase activity	Gene Ontology	GO:0016831	4	16	0.0203868	0.243646	ENSDARG00000027419|ENSDARG00000026348|ENSDARG00000075454|ENSDARG00000015537	http://amigo.geneontology.org/amigo/term/GO:0016831	enoyl-CoA hydratase activity	MF
double-stranded DNA binding	Gene Ontology	GO:0003690	8	53	0.0224412	0.262056	ENSDARG00000078473|ENSDARG00000077504|ENSDARG00000012777|ENSDARG00000099614|ENSDARG00000079124|ENSDARG00000074451|ENSDARG00000013477|ENSDARG00000067591	http://amigo.geneontology.org/amigo/term/GO:0003690	double-stranded DNA binding	MF
nucleosomal DNA binding	Gene Ontology	GO:0031492	5	25	0.0234475	0.265695	ENSDARG00000087636|ENSDARG00000077504|ENSDARG00000097102|ENSDARG00000062326|ENSDARG00000103919	http://amigo.geneontology.org/amigo/term/GO:0031492	nucleosomal DNA binding	MF
calmodulin-dependent protein kinase activity	Gene Ontology	GO:0004683	5	25	0.0234475	0.265695	ENSDARG00000043010|ENSDARG00000011373|ENSDARG00000078504|ENSDARG00000008788|ENSDARG00000043648	http://amigo.geneontology.org/amigo/term/GO:0004683	calmodulin-dependent protein kinase activity	MF
fatty acid binding	Gene Ontology	GO:0005504	3	10	0.0271524	0.290464	ENSDARG00000014727|ENSDARG00000007697|ENSDARG00000092170	http://amigo.geneontology.org/amigo/term/GO:0005504	fatty-acyl-CoA binding	MF
long-chain fatty acid transporter activity	Gene Ontology	GO:0005324	3	10	0.0271524	0.290464	ENSDARG00000104085|ENSDARG00000067520|ENSDARG00000036237	http://amigo.geneontology.org/amigo/term/GO:0005324	lipid transporter activity	MF
sterol binding	Gene Ontology	GO:0032934	4	18	0.029495	0.30904	ENSDARG00000076002|ENSDARG00000013830|ENSDARG00000053487|ENSDARG00000040027	http://amigo.geneontology.org/amigo/term/GO:0032934	fatty-acyl-CoA binding	MF
zinc ion binding	Gene Ontology	GO:0008270	58	706	0.0341522	0.347937	ENSDARG00000070127|ENSDARG00000005834|ENSDARG00000011166|ENSDARG00000034871|ENSDARG00000100394|ENSDARG00000074346|ENSDARG00000091211|ENSDARG00000051962|ENSDARG00000030786|ENSDARG00000095113|ENSDARG00000063375|ENSDARG00000025032|ENSDARG00000098645|ENSDARG00000075670|ENSDARG00000073716|ENSDARG00000070922|ENSDARG00000075735|ENSDARG00000016074|ENSDARG00000025983|ENSDARG00000013024|ENSDARG00000031915|…	http://amigo.geneontology.org/amigo/term/GO:0008270	iron ion binding	MF
chromatin binding	Gene Ontology	GO:0003682	19	187	0.0355024	0.347937	ENSDARG00000068175|ENSDARG00000044669|ENSDARG00000025983|ENSDARG00000074225|ENSDARG00000093999|ENSDARG00000056929|ENSDARG00000074346|ENSDARG00000003877|ENSDARG00000026664|ENSDARG00000074734|ENSDARG00000102810|ENSDARG00000035285|ENSDARG00000035732|ENSDARG00000086980|ENSDARG00000017266|ENSDARG00000099175|ENSDARG00000018691|ENSDARG00000100940|ENSDARG00000045776	http://amigo.geneontology.org/amigo/term/GO:0003682	chromatin binding	MF
cholesterol binding	Gene Ontology	GO:0015485	5	28	0.0355102	0.347937	ENSDARG00000030872|ENSDARG00000013830|ENSDARG00000021991|ENSDARG00000053487|ENSDARG00000040027	http://amigo.geneontology.org/amigo/term/GO:0015485	fatty-acyl-CoA binding	MF
FAD binding	Gene Ontology	GO:0071949	5	28	0.0355102	0.347937	ENSDARG00000035601|ENSDARG00000097017|ENSDARG00000005891|ENSDARG00000018966|ENSDARG00000014727	http://amigo.geneontology.org/amigo/term/GO:0071949	FAD binding	MF
L-ascorbic acid binding	Gene Ontology	GO:0031418	4	20	0.0407978	0.347937	ENSDARG00000078481|ENSDARG00000071212|ENSDARG00000010085|ENSDARG00000038996	http://amigo.geneontology.org/amigo/term/GO:0031418	fatty-acyl-CoA binding	MF
methyltransferase activity	Gene Ontology	GO:0008168	15	144	0.0477995	0.380839	ENSDARG00000102846|ENSDARG00000055151|ENSDARG00000035771|ENSDARG00000002830|ENSDARG00000091253|ENSDARG00000056914|ENSDARG00000074588|ENSDARG00000079605|ENSDARG00000036791|ENSDARG00000015201|ENSDARG00000086998|ENSDARG00000068967|ENSDARG00000021324|ENSDARG00000027572|ENSDARG00000061629	http://amigo.geneontology.org/amigo/term/GO:0008168	protein-L-isoaspartate (D-aspartate) O-methyltransferase activity	MF

## Sheet: down-regulated
GO enrichment analysis results for down-regulated DEGs in liver after overfeeding
Term	Database	ID	Input number	Background number	P-Value	Corrected P-Value	Input	Hyperlink	Representative	Class
vesicle transport along actin filament	Gene Ontology	GO:0030050	6	20	0.0145695	0.181565	ENSDARG00000078734|ENSDARG00000062003|ENSDARG00000058946|ENSDARG00000009133|ENSDARG00000061579|ENSDARG00000104235	http://amigo.geneontology.org/amigo/term/GO:0030050	vesicle transport along actin filament	BP
actin cytoskeleton organization	Gene Ontology	GO:0030036	23	144	0.0164072	0.191044	ENSDARG00000038010|ENSDARG00000045880|ENSDARG00000006603|ENSDARG00000094181|ENSDARG00000090785|ENSDARG00000092281|ENSDARG00000077656|ENSDARG00000055713|ENSDARG00000079895|ENSDARG00000079591|ENSDARG00000011961|ENSDARG00000094673|ENSDARG00000061948|ENSDARG00000012586|ENSDARG00000079900|ENSDARG00000027600|ENSDARG00000004877|ENSDARG00000033466|ENSDARG00000068973|ENSDARG00000088440|ENSDARG00000016551|…	http://amigo.geneontology.org/amigo/term/GO:0030036	vesicle transport along actin filament	BP
actomyosin structure organization	Gene Ontology	GO:0031032	6	22	0.0220228	0.206254	ENSDARG00000089856|ENSDARG00000035858|ENSDARG00000004877|ENSDARG00000040087|ENSDARG00000002332|ENSDARG00000102398	http://amigo.geneontology.org/amigo/term/GO:0031032	vesicle transport along actin filament	BP
actin filament depolymerization	Gene Ontology	GO:0030042	4	11	0.0235629	0.210621	ENSDARG00000094792|ENSDARG00000012972|ENSDARG00000011809|ENSDARG00000009727	http://amigo.geneontology.org/amigo/term/GO:0030042	vesicle transport along actin filament	BP
vasculature development	Gene Ontology	GO:0001944	12	69	0.0410108	0.289328	ENSDARG00000100494|ENSDARG00000038428|ENSDARG00000055398|ENSDARG00000074829|ENSDARG00000087863|ENSDARG00000042690|ENSDARG00000056642|ENSDARG00000103542|ENSDARG00000077866|ENSDARG00000005673|ENSDARG00000044167|ENSDARG00000016551	http://amigo.geneontology.org/amigo/term/GO:0001944	vasculature development	BP
atrioventricular valve development	Gene Ontology	GO:0003171	3	8	0.044325	0.302702	ENSDARG00000014098|ENSDARG00000036987|ENSDARG00000061941	http://amigo.geneontology.org/amigo/term/GO:0003171	vasculature development	BP
embryo development	Gene Ontology	GO:0009790	5	20	0.0476346	0.314	ENSDARG00000114554|ENSDARG00000116139|ENSDARG00000036292|ENSDARG00000014626|ENSDARG00000038006	http://amigo.geneontology.org/amigo/term/GO:0009790	vasculature development	BP
chromatin-mediated maintenance of transcription	Gene Ontology	GO:0048096	4	8	0.00825843	0.136889	ENSDARG00000042322|ENSDARG00000097473|ENSDARG00000074502|ENSDARG00000093412	http://amigo.geneontology.org/amigo/term/GO:0048096	transcription initiation-coupled chromatin remodeling	BP
superoxide anion generation	Gene Ontology	GO:0042554	4	7	0.00522162	0.106129	ENSDARG00000062632|ENSDARG00000087574|ENSDARG00000056615|ENSDARG00000005821	http://amigo.geneontology.org/amigo/term/GO:0042554	superoxide anion generation	BP
response to zinc ion	Gene Ontology	GO:0010043	4	11	0.0235629	0.210621	ENSDARG00000005823|ENSDARG00000101434|ENSDARG00000005463|ENSDARG00000053858	http://amigo.geneontology.org/amigo/term/GO:0010043	response to zinc ion	BP
response to glucose	Gene Ontology	GO:0009749	4	9	0.0122675	0.167787	ENSDARG00000070961|ENSDARG00000034293|ENSDARG00000026925|ENSDARG00000103542	http://amigo.geneontology.org/amigo/term/GO:0009749	response to glucose	BP
regulation of neutrophil chemotaxis	Gene Ontology	GO:0090022	3	6	0.0215209	0.205265	ENSDARG00000038010|ENSDARG00000041107|ENSDARG00000067916	http://amigo.geneontology.org/amigo/term/GO:0090022	regulation of neutrophil chemotaxis	BP
regulation of immune system process	Gene Ontology	GO:0002682	3	7	0.0318494	0.242751	ENSDARG00000023526|ENSDARG00000018342|ENSDARG00000069295	http://amigo.geneontology.org/amigo/term/GO:0002682	regulation of immune system process	BP
regulation of cytokine production	Gene Ontology	GO:0001817	6	18	0.00908042	0.140936	ENSDARG00000022000|ENSDARG00000069199|ENSDARG00000094012|ENSDARG00000078643|ENSDARG00000069295|ENSDARG00000056798	http://amigo.geneontology.org/amigo/term/GO:0001817	regulation of cytokine production	BP
regulation of cell population proliferation	Gene Ontology	GO:0042127	19	94	0.00279409	0.0747014	ENSDARG00000034895|ENSDARG00000061459|ENSDARG00000027807|ENSDARG00000043531|ENSDARG00000028731|ENSDARG00000040606|ENSDARG00000042861|ENSDARG00000059956|ENSDARG00000104359|ENSDARG00000022841|ENSDARG00000011449|ENSDARG00000078362|ENSDARG00000041947|ENSDARG00000077783|ENSDARG00000058647|ENSDARG00000015902|ENSDARG00000069433|ENSDARG00000104090|ENSDARG00000067916	http://amigo.geneontology.org/amigo/term/GO:0042127	regulation of cell population proliferation	BP
regulation of blood pressure	Gene Ontology	GO:0008217	7	25	0.0122846	0.167787	ENSDARG00000057064|ENSDARG00000077082|ENSDARG00000053854|ENSDARG00000010276|ENSDARG00000052148|ENSDARG00000103878|ENSDARG00000036809	http://amigo.geneontology.org/amigo/term/GO:0008217	regulation of blood pressure	BP
regulation of postsynapse organization	Gene Ontology	GO:0099175	3	6	0.0215209	0.205265	ENSDARG00000043084|ENSDARG00000035571|ENSDARG00000062049	http://amigo.geneontology.org/amigo/term/GO:0099175	regulation of blood pressure	BP
negative regulation of actin filament polymerization	Gene Ontology	GO:0030837	4	11	0.0235629	0.210621	ENSDARG00000088440|ENSDARG00000076566|ENSDARG00000079591|ENSDARG00000009727	http://amigo.geneontology.org/amigo/term/GO:0030837	regulation of blood pressure	BP
regulation of apoptotic process	Gene Ontology	GO:0042981	18	104	0.0155349	0.188104	ENSDARG00000002758|ENSDARG00000044619|ENSDARG00000022000|ENSDARG00000052741|ENSDARG00000101036|ENSDARG00000008434|ENSDARG00000088709|ENSDARG00000103485|ENSDARG00000062370|ENSDARG00000104290|ENSDARG00000097615|ENSDARG00000029865|ENSDARG00000068857|ENSDARG00000091926|ENSDARG00000070601|ENSDARG00000067672|ENSDARG00000069482|ENSDARG00000096959	http://amigo.geneontology.org/amigo/term/GO:0042981	regulation of apoptotic process	BP
negative regulation of cell death	Gene Ontology	GO:0060548	5	20	0.0476346	0.314	ENSDARG00000042934|ENSDARG00000060682|ENSDARG00000070480|ENSDARG00000076685|ENSDARG00000023062	http://amigo.geneontology.org/amigo/term/GO:0060548	regulation of apoptotic process	BP
proteolysis	Gene Ontology	GO:0006508	66	506	0.0118558	0.167787	ENSDARG00000007836|ENSDARG00000014907|ENSDARG00000074656|ENSDARG00000037533|ENSDARG00000068181|ENSDARG00000074185|ENSDARG00000051890|ENSDARG00000096975|ENSDARG00000001452|ENSDARG00000093093|ENSDARG00000011769|ENSDARG00000004748|ENSDARG00000056324|ENSDARG00000006052|ENSDARG00000104384|ENSDARG00000029747|ENSDARG00000061173|ENSDARG00000053323|ENSDARG00000103878|ENSDARG00000040251|ENSDARG00000069833|…	http://amigo.geneontology.org/amigo/term/GO:0006508	proteolysis	BP
positive regulation of proteasomal ubiquitin-dependent protein catabolic process	Gene Ontology	GO:0032436	7	32	0.0393082	0.281784	ENSDARG00000019125|ENSDARG00000091727|ENSDARG00000060768|ENSDARG00000016200|ENSDARG00000020284|ENSDARG00000045150|ENSDARG00000012040	http://amigo.geneontology.org/amigo/term/GO:0032436	positive regulation of proteasomal ubiquitin-dependent protein catabolic process	BP
positive regulation of JNK cascade	Gene Ontology	GO:0046330	6	17	0.00702162	0.126189	ENSDARG00000022000|ENSDARG00000101036|ENSDARG00000070470|ENSDARG00000071107|ENSDARG00000044827|ENSDARG00000069482	http://amigo.geneontology.org/amigo/term/GO:0046330	positive regulation of JNK cascade	BP
toll-like receptor signaling pathway	Gene Ontology	GO:0002224	6	18	0.00908042	0.140936	ENSDARG00000111612|ENSDARG00000052322|ENSDARG00000093750|ENSDARG00000044415|ENSDARG00000040249|ENSDARG00000002552	http://amigo.geneontology.org/amigo/term/GO:0002224	positive regulation of JNK cascade	BP
regulation of ARF protein signal transduction	Gene Ontology	GO:0032012	6	19	0.0115973	0.167787	ENSDARG00000007807|ENSDARG00000016551|ENSDARG00000077656|ENSDARG00000076742|ENSDARG00000021488|ENSDARG00000103984	http://amigo.geneontology.org/amigo/term/GO:0032012	positive regulation of JNK cascade	BP
regulation of immune response	Gene Ontology	GO:0050776	6	21	0.0180335	0.192428	ENSDARG00000069199|ENSDARG00000094012|ENSDARG00000078643|ENSDARG00000056798|ENSDARG00000068784|ENSDARG00000043249	http://amigo.geneontology.org/amigo/term/GO:0050776	positive regulation of JNK cascade	BP
negative regulation of MAP kinase activity	Gene Ontology	GO:0043407	3	6	0.0215209	0.205265	ENSDARG00000068732|ENSDARG00000033042|ENSDARG00000053131	http://amigo.geneontology.org/amigo/term/GO:0043407	positive regulation of JNK cascade	BP
negative regulation of Rho protein signal transduction	Gene Ontology	GO:0035024	3	6	0.0215209	0.205265	ENSDARG00000055678|ENSDARG00000056477|ENSDARG00000041565	http://amigo.geneontology.org/amigo/term/GO:0035024	positive regulation of JNK cascade	BP
regulation of I-kappaB kinase/NF-kappaB signaling	Gene Ontology	GO:0043122	4	11	0.0235629	0.210621	ENSDARG00000002663|ENSDARG00000069482|ENSDARG00000022000|ENSDARG00000101036	http://amigo.geneontology.org/amigo/term/GO:0043122	positive regulation of JNK cascade	BP
positive regulation of GTPase activity	Gene Ontology	GO:0043547	18	75	0.000562374	0.0300042	ENSDARG00000004015|ENSDARG00000095180|ENSDARG00000024775|ENSDARG00000052997|ENSDARG00000061459|ENSDARG00000036420|ENSDARG00000042329|ENSDARG00000016551|ENSDARG00000058389|ENSDARG00000090873|ENSDARG00000079286|ENSDARG00000103466|ENSDARG00000115610|ENSDARG00000078119|ENSDARG00000039351|ENSDARG00000062385|ENSDARG00000002607|ENSDARG00000101040	http://amigo.geneontology.org/amigo/term/GO:0043547	positive regulation of GTPase activity	BP
phosphatidylinositol-mediated signaling	Gene Ontology	GO:0048015	10	25	0.000219591	0.0160214	ENSDARG00000017757|ENSDARG00000075456|ENSDARG00000060841|ENSDARG00000062575|ENSDARG00000068246|ENSDARG00000075253|ENSDARG00000059960|ENSDARG00000079253|ENSDARG00000034080|ENSDARG00000062823	http://amigo.geneontology.org/amigo/term/GO:0048015	phosphatidylinositol-mediated signaling	BP
phosphatidylinositol 3-kinase signaling	Gene Ontology	GO:0014065	5	16	0.0213226	0.205265	ENSDARG00000075253|ENSDARG00000017757|ENSDARG00000075456|ENSDARG00000056985|ENSDARG00000060841	http://amigo.geneontology.org/amigo/term/GO:0014065	phosphatidylinositol-mediated signaling	BP
peptidyl-tyrosine autophosphorylation	Gene Ontology	GO:0038083	10	33	0.00177798	0.0583754	ENSDARG00000022841|ENSDARG00000067916|ENSDARG00000027807|ENSDARG00000059956|ENSDARG00000011449|ENSDARG00000041947|ENSDARG00000077783|ENSDARG00000058647|ENSDARG00000069433|ENSDARG00000078222	http://amigo.geneontology.org/amigo/term/GO:0038083	peptidyl-tyrosine autophosphorylation	BP
peptide cross-linking	Gene Ontology	GO:0018149	5	10	0.00325126	0.0828485	ENSDARG00000017799|ENSDARG00000102106|ENSDARG00000101595|ENSDARG00000074094|ENSDARG00000098837	http://amigo.geneontology.org/amigo/term/GO:0018149	peptide cross-linking	BP
neutrophil differentiation	Gene Ontology	GO:0030223	8	20	0.000909427	0.0408594	ENSDARG00000100494|ENSDARG00000087646|ENSDARG00000045959|ENSDARG00000021059|ENSDARG00000088877|ENSDARG00000102211|ENSDARG00000000767|ENSDARG00000098752	http://amigo.geneontology.org/amigo/term/GO:0030223	neutrophil differentiation	BP
microglia development	Gene Ontology	GO:0014005	4	5	0.00158273	0.0562953	ENSDARG00000056407|ENSDARG00000055226|ENSDARG00000099936|ENSDARG00000091003	http://amigo.geneontology.org/amigo/term/GO:0014005	neutrophil differentiation	BP
transmembrane transport	Gene Ontology	GO:0055085	95	528	2.02366e-08	1.15166e-05	ENSDARG00000021787|ENSDARG00000019932|ENSDARG00000036383|ENSDARG00000056200|ENSDARG00000013871|ENSDARG00000074561|ENSDARG00000088263|ENSDARG00000005823|ENSDARG00000055523|ENSDARG00000032799|ENSDARG00000061120|ENSDARG00000077812|ENSDARG00000101434|ENSDARG00000061566|ENSDARG00000041107|ENSDARG00000037861|ENSDARG00000061233|ENSDARG00000008568|ENSDARG00000100227|ENSDARG00000059792|ENSDARG00000055253|…	http://amigo.geneontology.org/amigo/term/GO:0055085	metal ion transport	BP
cation transport	Gene Ontology	GO:0006812	11	51	0.0128759	0.174229	ENSDARG00000044752|ENSDARG00000004455|ENSDARG00000005463|ENSDARG00000063435|ENSDARG00000059993|ENSDARG00000090900|ENSDARG00000073881|ENSDARG00000078560|ENSDARG00000059792|ENSDARG00000103983|ENSDARG00000003699	http://amigo.geneontology.org/amigo/term/GO:0006812	metal ion transport	BP
zinc ion import across plasma membrane	Gene Ontology	GO:0071578	3	5	0.0133686	0.174229	ENSDARG00000005823|ENSDARG00000059361|ENSDARG00000079525	http://amigo.geneontology.org/amigo/term/GO:0071578	metal ion transport	BP
divalent metal ion transport	Gene Ontology	GO:0070838	4	10	0.0173443	0.191044	ENSDARG00000059993|ENSDARG00000059792|ENSDARG00000063435|ENSDARG00000103476	http://amigo.geneontology.org/amigo/term/GO:0070838	metal ion transport	BP
cation transmembrane transport	Gene Ontology	GO:0098655	6	24	0.0316939	0.242751	ENSDARG00000044752|ENSDARG00000004455|ENSDARG00000063435|ENSDARG00000059993|ENSDARG00000103476|ENSDARG00000059792	http://amigo.geneontology.org/amigo/term/GO:0098655	metal ion transport	BP
anion transmembrane transport	Gene Ontology	GO:0098656	4	13	0.0396114	0.281784	ENSDARG00000059053|ENSDARG00000062182|ENSDARG00000053853|ENSDARG00000045638	http://amigo.geneontology.org/amigo/term/GO:0098656	metal ion transport	BP
magnesium ion transport	Gene Ontology	GO:0015693	3	8	0.044325	0.302702	ENSDARG00000055917|ENSDARG00000055912|ENSDARG00000021147	http://amigo.geneontology.org/amigo/term/GO:0015693	metal ion transport	BP
membrane fusion	Gene Ontology	GO:0061025	6	23	0.0265675	0.228111	ENSDARG00000062280|ENSDARG00000006112|ENSDARG00000008019|ENSDARG00000017128|ENSDARG00000026049|ENSDARG00000063159	http://amigo.geneontology.org/amigo/term/GO:0061025	membrane fusion	BP
macrophage differentiation	Gene Ontology	GO:0030225	5	11	0.00483953	0.104588	ENSDARG00000045959|ENSDARG00000056407|ENSDARG00000102211|ENSDARG00000000767|ENSDARG00000098752	http://amigo.geneontology.org/amigo/term/GO:0030225	macrophage differentiation	BP
myeloid cell development	Gene Ontology	GO:0061515	6	17	0.00702162	0.126189	ENSDARG00000021938|ENSDARG00000056407|ENSDARG00000102211|ENSDARG00000098752|ENSDARG00000058226|ENSDARG00000027199	http://amigo.geneontology.org/amigo/term/GO:0061515	macrophage differentiation	BP
hematopoietic stem cell proliferation	Gene Ontology	GO:0071425	4	10	0.0173443	0.191044	ENSDARG00000020541|ENSDARG00000102211|ENSDARG00000098752|ENSDARG00000098745	http://amigo.geneontology.org/amigo/term/GO:0071425	macrophage differentiation	BP
myeloid cell differentiation	Gene Ontology	GO:0030099	7	27	0.0179016	0.192428	ENSDARG00000087646|ENSDARG00000045959|ENSDARG00000102211|ENSDARG00000000767|ENSDARG00000098752|ENSDARG00000100846|ENSDARG00000031817	http://amigo.geneontology.org/amigo/term/GO:0030099	macrophage differentiation	BP
embryonic hemopoiesis	Gene Ontology	GO:0035162	8	37	0.0305654	0.242751	ENSDARG00000087646|ENSDARG00000045959|ENSDARG00000041107|ENSDARG00000020541|ENSDARG00000102211|ENSDARG00000073743|ENSDARG00000053131|ENSDARG00000038095	http://amigo.geneontology.org/amigo/term/GO:0035162	macrophage differentiation	BP
hemopoiesis	Gene Ontology	GO:0030097	15	90	0.0336093	0.25167	ENSDARG00000087646|ENSDARG00000014793|ENSDARG00000059001|ENSDARG00000056407|ENSDARG00000068732|ENSDARG00000052826|ENSDARG00000105023|ENSDARG00000036292|ENSDARG00000098745|ENSDARG00000103542|ENSDARG00000058226|ENSDARG00000114554|ENSDARG00000045733|ENSDARG00000074771|ENSDARG00000040917	http://amigo.geneontology.org/amigo/term/GO:0030097	macrophage differentiation	BP
cellular zinc ion homeostasis	Gene Ontology	GO:0006882	5	12	0.0069124	0.126189	ENSDARG00000079525|ENSDARG00000059361|ENSDARG00000005463|ENSDARG00000103983|ENSDARG00000005823	http://amigo.geneontology.org/amigo/term/GO:0006882	intracellular zinc ion homeostasis	BP
chloride ion homeostasis	Gene Ontology	GO:0055064	5	18	0.0327777	0.246525	ENSDARG00000013855|ENSDARG00000055253|ENSDARG00000056590|ENSDARG00000062058|ENSDARG00000055313	http://amigo.geneontology.org/amigo/term/GO:0055064	intracellular zinc ion homeostasis	BP
intracellular signal transduction	Gene Ontology	GO:0035556	71	457	0.000122709	0.0110263	ENSDARG00000005372|ENSDARG00000104672|ENSDARG00000062575|ENSDARG00000060626|ENSDARG00000052496|ENSDARG00000074307|ENSDARG00000040380|ENSDARG00000020625|ENSDARG00000074121|ENSDARG00000062460|ENSDARG00000033437|ENSDARG00000060596|ENSDARG00000062049|ENSDARG00000088699|ENSDARG00000086585|ENSDARG00000104793|ENSDARG00000055875|ENSDARG00000056112|ENSDARG00000091320|ENSDARG00000097615|ENSDARG00000079031|…	http://amigo.geneontology.org/amigo/term/GO:0035556	intracellular signal transduction	BP
cell surface receptor signaling pathway	Gene Ontology	GO:0007166	19	98	0.00432596	0.0992501	ENSDARG00000087870|ENSDARG00000086911|ENSDARG00000074782|ENSDARG00000078217|ENSDARG00000096577|ENSDARG00000043182|ENSDARG00000105470|ENSDARG00000032639|ENSDARG00000025478|ENSDARG00000006678|ENSDARG00000089904|ENSDARG00000061121|ENSDARG00000104359|ENSDARG00000032389|ENSDARG00000093008|ENSDARG00000003989|ENSDARG00000027589|ENSDARG00000076140|ENSDARG00000105416	http://amigo.geneontology.org/amigo/term/GO:0007166	intracellular signal transduction	BP
intermediate filament cytoskeleton organization	Gene Ontology	GO:0045104	6	17	0.00702162	0.126189	ENSDARG00000011998|ENSDARG00000028306|ENSDARG00000060830|ENSDARG00000103459|ENSDARG00000022309|ENSDARG00000101043	http://amigo.geneontology.org/amigo/term/GO:0045104	intermediate filament cytoskeleton organization	BP
integrin-mediated signaling pathway	Gene Ontology	GO:0007229	14	49	0.000432256	0.0273329	ENSDARG00000057787|ENSDARG00000002956|ENSDARG00000044694|ENSDARG00000001452|ENSDARG00000028507|ENSDARG00000075733|ENSDARG00000098899|ENSDARG00000010070|ENSDARG00000104484|ENSDARG00000042282|ENSDARG00000002494|ENSDARG00000035514|ENSDARG00000062974|ENSDARG00000052652	http://amigo.geneontology.org/amigo/term/GO:0007229	integrin-mediated signaling pathway	BP
transmembrane receptor protein tyrosine kinase signaling pathway	Gene Ontology	GO:0007169	23	111	0.000788597	0.0363882	ENSDARG00000022841|ENSDARG00000004586|ENSDARG00000017321|ENSDARG00000087197|ENSDARG00000042861|ENSDARG00000060235|ENSDARG00000013847|ENSDARG00000011449|ENSDARG00000055305|ENSDARG00000043317|ENSDARG00000067916|ENSDARG00000020080|ENSDARG00000012071|ENSDARG00000042722|ENSDARG00000059956|ENSDARG00000058647|ENSDARG00000027807|ENSDARG00000058695|ENSDARG00000090607|ENSDARG00000017354|ENSDARG00000041947|…	http://amigo.geneontology.org/amigo/term/GO:0007169	integrin-mediated signaling pathway	BP
phosphorylation	Gene Ontology	GO:0016310	91	653	0.000560213	0.0300042	ENSDARG00000060841|ENSDARG00000031698|ENSDARG00000033437|ENSDARG00000045150|ENSDARG00000060596|ENSDARG00000056112|ENSDARG00000070448|ENSDARG00000036056|ENSDARG00000005416|ENSDARG00000089856|ENSDARG00000039452|ENSDARG00000060504|ENSDARG00000060184|ENSDARG00000004877|ENSDARG00000058381|ENSDARG00000032932|ENSDARG00000055305|ENSDARG00000060116|ENSDARG00000059406|ENSDARG00000077783|ENSDARG00000002552|…	http://amigo.geneontology.org/amigo/term/GO:0016310	glycolytic process	BP
protein phosphorylation	Gene Ontology	GO:0006468	87	641	0.00154293	0.0562953	ENSDARG00000031698|ENSDARG00000016200|ENSDARG00000078222|ENSDARG00000033437|ENSDARG00000045150|ENSDARG00000060596|ENSDARG00000100534|ENSDARG00000070448|ENSDARG00000036056|ENSDARG00000005416|ENSDARG00000089856|ENSDARG00000060184|ENSDARG00000004877|ENSDARG00000057000|ENSDARG00000058381|ENSDARG00000055305|ENSDARG00000001933|ENSDARG00000060116|ENSDARG00000059406|ENSDARG00000028676|ENSDARG00000077783|…	http://amigo.geneontology.org/amigo/term/GO:0006468	glycolytic process	BP
glycolytic process	Gene Ontology	GO:0006096	10	37	0.00397111	0.0928746	ENSDARG00000039914|ENSDARG00000039452|ENSDARG00000060504|ENSDARG00000012801|ENSDARG00000019702|ENSDARG00000099730|ENSDARG00000022456|ENSDARG00000011665|ENSDARG00000101482|ENSDARG00000013750	http://amigo.geneontology.org/amigo/term/GO:0006096	glycolytic process	BP
one-carbon metabolic process	Gene Ontology	GO:0006730	9	37	0.0115546	0.167787	ENSDARG00000042221|ENSDARG00000098646|ENSDARG00000102300|ENSDARG00000044809|ENSDARG00000056499|ENSDARG00000043589|ENSDARG00000042293|ENSDARG00000040334|ENSDARG00000056331	http://amigo.geneontology.org/amigo/term/GO:0006730	glycolytic process	BP
phosphatidylinositol-3-phosphate biosynthetic process	Gene Ontology	GO:0036092	4	9	0.0122675	0.167787	ENSDARG00000075253|ENSDARG00000017757|ENSDARG00000075456|ENSDARG00000060841	http://amigo.geneontology.org/amigo/term/GO:0036092	glycolytic process	BP
phosphatidylinositol phosphorylation	Gene Ontology	GO:0046854	10	50	0.0269536	0.228943	ENSDARG00000017757|ENSDARG00000003517|ENSDARG00000033666|ENSDARG00000062823|ENSDARG00000060841|ENSDARG00000053488|ENSDARG00000075456|ENSDARG00000025428|ENSDARG00000075253|ENSDARG00000038095	http://amigo.geneontology.org/amigo/term/GO:0046854	glycolytic process	BP
protein glycosylation	Gene Ontology	GO:0006486	18	115	0.036326	0.267323	ENSDARG00000012355|ENSDARG00000112644|ENSDARG00000014386|ENSDARG00000038489|ENSDARG00000059056|ENSDARG00000039008|ENSDARG00000044514|ENSDARG00000057303|ENSDARG00000015374|ENSDARG00000053133|ENSDARG00000012407|ENSDARG00000043814|ENSDARG00000088515|ENSDARG00000018971|ENSDARG00000012745|ENSDARG00000030733|ENSDARG00000052376|ENSDARG00000045851	http://amigo.geneontology.org/amigo/term/GO:0006486	glycolytic process	BP
phosphatidic acid biosynthetic process	Gene Ontology	GO:0006654	3	8	0.044325	0.302702	ENSDARG00000102887|ENSDARG00000034262|ENSDARG00000057125	http://amigo.geneontology.org/amigo/term/GO:0006654	glycolytic process	BP
phospholipid dephosphorylation	Gene Ontology	GO:0046839	5	20	0.0476346	0.314	ENSDARG00000060534|ENSDARG00000057209|ENSDARG00000079790|ENSDARG00000079671|ENSDARG00000040255	http://amigo.geneontology.org/amigo/term/GO:0046839	glycolytic process	BP
peptidyl-tyrosine dephosphorylation	Gene Ontology	GO:0035335	5	20	0.0476346	0.314	ENSDARG00000019307|ENSDARG00000094836|ENSDARG00000006308|ENSDARG00000103479|ENSDARG00000009299	http://amigo.geneontology.org/amigo/term/GO:0035335	glycolytic process	BP
exocytosis	Gene Ontology	GO:0006887	13	76	0.0384921	0.280843	ENSDARG00000014340|ENSDARG00000052954|ENSDARG00000055252|ENSDARG00000040965|ENSDARG00000043661|ENSDARG00000062135|ENSDARG00000075436|ENSDARG00000044039|ENSDARG00000078060|ENSDARG00000058160|ENSDARG00000070567|ENSDARG00000007711|ENSDARG00000004618	http://amigo.geneontology.org/amigo/term/GO:0006887	exocytosis	BP
epiboly involved in gastrulation with mouth forming second	Gene Ontology	GO:0055113	10	46	0.0163729	0.191044	ENSDARG00000043128|ENSDARG00000007807|ENSDARG00000005823|ENSDARG00000059906|ENSDARG00000012513|ENSDARG00000076742|ENSDARG00000021488|ENSDARG00000032631|ENSDARG00000002552|ENSDARG00000040534	http://amigo.geneontology.org/amigo/term/GO:0055113	epiboly involved in gastrulation with mouth forming second	BP
endothelial to hematopoietic transition	Gene Ontology	GO:0098508	4	13	0.0396114	0.281784	ENSDARG00000010317|ENSDARG00000074771|ENSDARG00000087646|ENSDARG00000104795	http://amigo.geneontology.org/amigo/term/GO:0098508	endothelial to hematopoietic transition	BP
defense response to bacterium	Gene Ontology	GO:0042742	20	57	1.54768e-06	0.000440391	ENSDARG00000031976|ENSDARG00000052322|ENSDARG00000041107|ENSDARG00000098700|ENSDARG00000068382|ENSDARG00000052039|ENSDARG00000102175|ENSDARG00000002663|ENSDARG00000038010|ENSDARG00000045561|ENSDARG00000044415|ENSDARG00000032639|ENSDARG00000043093|ENSDARG00000026925|ENSDARG00000069844|ENSDARG00000068857|ENSDARG00000009511|ENSDARG00000078147|ENSDARG00000104290|ENSDARG00000004586	http://amigo.geneontology.org/amigo/term/GO:0042742	defense response to bacterium	BP
inflammatory response	Gene Ontology	GO:0006954	33	147	1.47403e-05	0.00279622	ENSDARG00000031976|ENSDARG00000001452|ENSDARG00000052322|ENSDARG00000052039|ENSDARG00000103466|ENSDARG00000068857|ENSDARG00000009511|ENSDARG00000101040|ENSDARG00000087863|ENSDARG00000104795|ENSDARG00000044415|ENSDARG00000115610|ENSDARG00000098696|ENSDARG00000093750|ENSDARG00000114454|ENSDARG00000025522|ENSDARG00000010276|ENSDARG00000039351|ENSDARG00000052148|ENSDARG00000040249|ENSDARG00000075045|…	http://amigo.geneontology.org/amigo/term/GO:0006954	defense response to bacterium	BP
response to bacterium	Gene Ontology	GO:0009617	17	54	3.49781e-05	0.00459367	ENSDARG00000042725|ENSDARG00000109301|ENSDARG00000019521|ENSDARG00000098700|ENSDARG00000062788|ENSDARG00000041041|ENSDARG00000090730|ENSDARG00000102175|ENSDARG00000104045|ENSDARG00000033227|ENSDARG00000042816|ENSDARG00000104795|ENSDARG00000009511|ENSDARG00000062632|ENSDARG00000004301|ENSDARG00000045999|ENSDARG00000100534	http://amigo.geneontology.org/amigo/term/GO:0009617	defense response to bacterium	BP
innate immune response	Gene Ontology	GO:0045087	25	104	5.30172e-05	0.00646541	ENSDARG00000022841|ENSDARG00000022000|ENSDARG00000041041|ENSDARG00000104045|ENSDARG00000052039|ENSDARG00000030161|ENSDARG00000068857|ENSDARG00000078155|ENSDARG00000100534|ENSDARG00000044415|ENSDARG00000011449|ENSDARG00000068275|ENSDARG00000068995|ENSDARG00000067916|ENSDARG00000098696|ENSDARG00000052322|ENSDARG00000059956|ENSDARG00000104290|ENSDARG00000058647|ENSDARG00000027807|ENSDARG00000055276|…	http://amigo.geneontology.org/amigo/term/GO:0045087	defense response to bacterium	BP
neutrophil chemotaxis	Gene Ontology	GO:0030593	18	63	7.11716e-05	0.00810071	ENSDARG00000114454|ENSDARG00000017757|ENSDARG00000038010|ENSDARG00000104795|ENSDARG00000102776|ENSDARG00000074851|ENSDARG00000102332|ENSDARG00000058389|ENSDARG00000039351|ENSDARG00000115610|ENSDARG00000075045|ENSDARG00000103466|ENSDARG00000098752|ENSDARG00000098700|ENSDARG00000062632|ENSDARG00000090873|ENSDARG00000101040|ENSDARG00000067916	http://amigo.geneontology.org/amigo/term/GO:0030593	defense response to bacterium	BP
response to wounding	Gene Ontology	GO:0009611	8	16	0.000215251	0.0160214	ENSDARG00000031976|ENSDARG00000038010|ENSDARG00000062632|ENSDARG00000104795|ENSDARG00000087084|ENSDARG00000026925|ENSDARG00000067916|ENSDARG00000024546	http://amigo.geneontology.org/amigo/term/GO:0009611	defense response to bacterium	BP
response to lipopolysaccharide	Gene Ontology	GO:0032496	9	23	0.000520686	0.0300042	ENSDARG00000031976|ENSDARG00000098700|ENSDARG00000020483|ENSDARG00000023526|ENSDARG00000018342|ENSDARG00000026925|ENSDARG00000009511|ENSDARG00000077308|ENSDARG00000078147	http://amigo.geneontology.org/amigo/term/GO:0032496	defense response to bacterium	BP
cytokine-mediated signaling pathway	Gene Ontology	GO:0019221	15	57	0.00063215	0.0323037	ENSDARG00000016570|ENSDARG00000098700|ENSDARG00000100534|ENSDARG00000074850|ENSDARG00000099342|ENSDARG00000045959|ENSDARG00000028731|ENSDARG00000005673|ENSDARG00000039436|ENSDARG00000080020|ENSDARG00000070961|ENSDARG00000032571|ENSDARG00000015902|ENSDARG00000074771|ENSDARG00000053131	http://amigo.geneontology.org/amigo/term/GO:0019221	defense response to bacterium	BP
defense response	Gene Ontology	GO:0006952	10	29	0.000687434	0.0328657	ENSDARG00000019521|ENSDARG00000015902|ENSDARG00000104795|ENSDARG00000062788|ENSDARG00000102776|ENSDARG00000087574|ENSDARG00000069844|ENSDARG00000028731|ENSDARG00000062632|ENSDARG00000056615	http://amigo.geneontology.org/amigo/term/GO:0006952	defense response to bacterium	BP
inflammatory response to wounding	Gene Ontology	GO:0090594	5	8	0.00124798	0.0507301	ENSDARG00000031976|ENSDARG00000042816|ENSDARG00000024546|ENSDARG00000004586|ENSDARG00000062788	http://amigo.geneontology.org/amigo/term/GO:0090594	defense response to bacterium	BP
immune response	Gene Ontology	GO:0006955	37	224	0.00173315	0.0580193	ENSDARG00000007836|ENSDARG00000074656|ENSDARG00000102776|ENSDARG00000020483|ENSDARG00000041041|ENSDARG00000032639|ENSDARG00000103466|ENSDARG00000057113|ENSDARG00000009511|ENSDARG00000040251|ENSDARG00000068141|ENSDARG00000104795|ENSDARG00000114454|ENSDARG00000043182|ENSDARG00000062489|ENSDARG00000003902|ENSDARG00000059410|ENSDARG00000101040|ENSDARG00000103049|ENSDARG00000115610|ENSDARG00000044694|…	http://amigo.geneontology.org/amigo/term/GO:0006955	defense response to bacterium	BP
leukocyte chemotaxis	Gene Ontology	GO:0030595	6	13	0.00193961	0.0609594	ENSDARG00000104795|ENSDARG00000102776|ENSDARG00000114454|ENSDARG00000010317|ENSDARG00000075045|ENSDARG00000102908	http://amigo.geneontology.org/amigo/term/GO:0030595	defense response to bacterium	BP
cellular response to stress	Gene Ontology	GO:0033554	5	9	0.00207764	0.0609594	ENSDARG00000098696|ENSDARG00000058734|ENSDARG00000005416|ENSDARG00000055276|ENSDARG00000104760	http://amigo.geneontology.org/amigo/term/GO:0033554	defense response to bacterium	BP
response to yeast	Gene Ontology	GO:0001878	8	24	0.00280028	0.0747014	ENSDARG00000042725|ENSDARG00000019228|ENSDARG00000063677|ENSDARG00000022000|ENSDARG00000015657|ENSDARG00000040041|ENSDARG00000054914|ENSDARG00000032010	http://amigo.geneontology.org/amigo/term/GO:0001878	defense response to bacterium	BP
chemokine-mediated signaling pathway	Gene Ontology	GO:0070098	11	43	0.00389941	0.0924643	ENSDARG00000104795|ENSDARG00000102776|ENSDARG00000114454|ENSDARG00000041041|ENSDARG00000058389|ENSDARG00000075045|ENSDARG00000103466|ENSDARG00000115610|ENSDARG00000039351|ENSDARG00000090873|ENSDARG00000101040	http://amigo.geneontology.org/amigo/term/GO:0070098	defense response to bacterium	BP
response to cytokine	Gene Ontology	GO:0034097	5	11	0.00483953	0.104588	ENSDARG00000098696|ENSDARG00000111612|ENSDARG00000075261|ENSDARG00000002552|ENSDARG00000055276	http://amigo.geneontology.org/amigo/term/GO:0034097	defense response to bacterium	BP
entrainment of circadian clock by photoperiod	Gene Ontology	GO:0043153	4	8	0.00825843	0.136889	ENSDARG00000010519|ENSDARG00000054222|ENSDARG00000056885|ENSDARG00000012499	http://amigo.geneontology.org/amigo/term/GO:0043153	defense response to bacterium	BP
defense response to fungus	Gene Ontology	GO:0050832	3	5	0.0133686	0.174229	ENSDARG00000038010|ENSDARG00000062632|ENSDARG00000033735	http://amigo.geneontology.org/amigo/term/GO:0050832	defense response to bacterium	BP
humoral immune response	Gene Ontology	GO:0006959	3	6	0.0215209	0.205265	ENSDARG00000098903|ENSDARG00000056784|ENSDARG00000019457	http://amigo.geneontology.org/amigo/term/GO:0006959	defense response to bacterium	BP
granulocyte chemotaxis	Gene Ontology	GO:0071621	3	6	0.0215209	0.205265	ENSDARG00000104359|ENSDARG00000075045|ENSDARG00000104795	http://amigo.geneontology.org/amigo/term/GO:0071621	defense response to bacterium	BP
defense response to Gram-positive bacterium	Gene Ontology	GO:0050830	6	22	0.0220228	0.206254	ENSDARG00000056874|ENSDARG00000102175|ENSDARG00000090615|ENSDARG00000036063|ENSDARG00000068995|ENSDARG00000068993	http://amigo.geneontology.org/amigo/term/GO:0050830	defense response to bacterium	BP
antimicrobial humoral immune response mediated by antimicrobial peptide	Gene Ontology	GO:0061844	4	11	0.0235629	0.210621	ENSDARG00000075045|ENSDARG00000104795|ENSDARG00000102776|ENSDARG00000114454	http://amigo.geneontology.org/amigo/term/GO:0061844	defense response to bacterium	BP
tumor necrosis factor-mediated signaling pathway	Gene Ontology	GO:0033209	4	12	0.030975	0.242751	ENSDARG00000101036|ENSDARG00000069482|ENSDARG00000022000|ENSDARG00000103799	http://amigo.geneontology.org/amigo/term/GO:0033209	defense response to bacterium	BP
complement activation, lectin pathway	Gene Ontology	GO:0001867	4	12	0.030975	0.242751	ENSDARG00000038682|ENSDARG00000116066|ENSDARG00000096586|ENSDARG00000090783	http://amigo.geneontology.org/amigo/term/GO:0001867	defense response to bacterium	BP
response to molecule of bacterial origin	Gene Ontology	GO:0002237	3	7	0.0318494	0.242751	ENSDARG00000009511|ENSDARG00000098700|ENSDARG00000020483	http://amigo.geneontology.org/amigo/term/GO:0002237	defense response to bacterium	BP
response to hormone	Gene Ontology	GO:0009725	5	18	0.0327777	0.246525	ENSDARG00000031976|ENSDARG00000055092|ENSDARG00000075261|ENSDARG00000026925|ENSDARG00000000151	http://amigo.geneontology.org/amigo/term/GO:0009725	defense response to bacterium	BP
macrophage chemotaxis	Gene Ontology	GO:0048246	4	13	0.0396114	0.281784	ENSDARG00000041041|ENSDARG00000038010|ENSDARG00000062632|ENSDARG00000098700	http://amigo.geneontology.org/amigo/term/GO:0048246	defense response to bacterium	BP
cell migration	Gene Ontology	GO:0016477	22	151	0.0436365	0.302702	ENSDARG00000017757|ENSDARG00000017321|ENSDARG00000060841|ENSDARG00000077938|ENSDARG00000104484|ENSDARG00000059906|ENSDARG00000075253|ENSDARG00000060235|ENSDARG00000055713|ENSDARG00000008191|ENSDARG00000019235|ENSDARG00000094673|ENSDARG00000002084|ENSDARG00000012586|ENSDARG00000002494|ENSDARG00000027777|ENSDARG00000020080|ENSDARG00000075456|ENSDARG00000104219|ENSDARG00000012968|ENSDARG00000039142|…	http://amigo.geneontology.org/amigo/term/GO:0016477	defense response to bacterium	BP
cellular response to lipopolysaccharide	Gene Ontology	GO:0071222	6	26	0.0437768	0.302702	ENSDARG00000104795|ENSDARG00000102776|ENSDARG00000114454|ENSDARG00000043182|ENSDARG00000075045|ENSDARG00000098700	http://amigo.geneontology.org/amigo/term/GO:0071222	defense response to bacterium	BP
collagen fibril organization	Gene Ontology	GO:0030199	7	27	0.0179016	0.192428	ENSDARG00000011821|ENSDARG00000102332|ENSDARG00000003259|ENSDARG00000045835|ENSDARG00000104089|ENSDARG00000042816|ENSDARG00000012422	http://amigo.geneontology.org/amigo/term/GO:0030199	collagen fibril organization	BP
cellular response to vascular endothelial growth factor stimulus	Gene Ontology	GO:0035924	3	7	0.0318494	0.242751	ENSDARG00000104359|ENSDARG00000002552|ENSDARG00000017321	http://amigo.geneontology.org/amigo/term/GO:0035924	cellular response to vascular endothelial growth factor stimulus	BP
cell motility	Gene Ontology	GO:0048870	5	18	0.0327777	0.246525	ENSDARG00000012972|ENSDARG00000028507|ENSDARG00000034262|ENSDARG00000057125|ENSDARG00000056985	http://amigo.geneontology.org/amigo/term/GO:0048870	cell motility	BP
cell adhesion mediated by integrin	Gene Ontology	GO:0033627	4	14	0.0494826	0.315228	ENSDARG00000028507|ENSDARG00000002494|ENSDARG00000104484|ENSDARG00000059906	http://amigo.geneontology.org/amigo/term/GO:0033627	cell adhesion mediated by integrin	BP
cell adhesion	Gene Ontology	GO:0007155	48	324	0.00347105	0.0867161	ENSDARG00000042934|ENSDARG00000043128|ENSDARG00000071462|ENSDARG00000015955|ENSDARG00000036175|ENSDARG00000062693|ENSDARG00000020072|ENSDARG00000014047|ENSDARG00000009123|ENSDARG00000040628|ENSDARG00000059906|ENSDARG00000054616|ENSDARG00000077419|ENSDARG00000087863|ENSDARG00000009544|ENSDARG00000062974|ENSDARG00000098237|ENSDARG00000102441|ENSDARG00000002494|ENSDARG00000098788|ENSDARG00000011449|…	http://amigo.geneontology.org/amigo/term/GO:0007155	cell adhesion	BP
carbohydrate metabolic process	Gene Ontology	GO:0005975	24	158	0.0242996	0.212751	ENSDARG00000008238|ENSDARG00000015657|ENSDARG00000009266|ENSDARG00000002021|ENSDARG00000101482|ENSDARG00000099185|ENSDARG00000009612|ENSDARG00000037307|ENSDARG00000069543|ENSDARG00000018178|ENSDARG00000030733|ENSDARG00000034375|ENSDARG00000039452|ENSDARG00000104042|ENSDARG00000092404|ENSDARG00000116259|ENSDARG00000009443|ENSDARG00000101251|ENSDARG00000030687|ENSDARG00000036427|ENSDARG00000061357|…	http://amigo.geneontology.org/amigo/term/GO:0005975	carbohydrate metabolic process	BP
camera-type eye morphogenesis	Gene Ontology	GO:0048593	5	12	0.0069124	0.126189	ENSDARG00000059001|ENSDARG00000092362|ENSDARG00000021924|ENSDARG00000077811|ENSDARG00000029688	http://amigo.geneontology.org/amigo/term/GO:0048593	camera-type eye morphogenesis	BP
bicellular tight junction assembly	Gene Ontology	GO:0070830	14	46	0.000232423	0.0160214	ENSDARG00000043128|ENSDARG00000015955|ENSDARG00000009544|ENSDARG00000036376|ENSDARG00000043133|ENSDARG00000014047|ENSDARG00000040628|ENSDARG00000054616|ENSDARG00000112049|ENSDARG00000016081|ENSDARG00000028096|ENSDARG00000057826|ENSDARG00000069888|ENSDARG00000069503	http://amigo.geneontology.org/amigo/term/GO:0070830	bicellular tight junction assembly	BP
anterior/posterior axis specification	Gene Ontology	GO:0009948	5	15	0.0166885	0.191044	ENSDARG00000098696|ENSDARG00000008388|ENSDARG00000114554|ENSDARG00000116139|ENSDARG00000036292	http://amigo.geneontology.org/amigo/term/GO:0009948	anterior/posterior axis specification	BP
amino acid transport	Gene Ontology	GO:0006865	10	28	0.000527265	0.0300042	ENSDARG00000099265|ENSDARG00000036427|ENSDARG00000099111|ENSDARG00000075831|ENSDARG00000057352|ENSDARG00000037012|ENSDARG00000100227|ENSDARG00000017165|ENSDARG00000061566|ENSDARG00000054423	http://amigo.geneontology.org/amigo/term/GO:0006865	amino acid transport	BP
amino acid transmembrane transport	Gene Ontology	GO:0003333	9	27	0.00157102	0.0562953	ENSDARG00000099265|ENSDARG00000075618|ENSDARG00000075831|ENSDARG00000008100|ENSDARG00000014587|ENSDARG00000055226|ENSDARG00000020278|ENSDARG00000005894|ENSDARG00000054423	http://amigo.geneontology.org/amigo/term/GO:0003333	amino acid transport	BP
monocarboxylic acid transport	Gene Ontology	GO:0015718	7	20	0.00387364	0.0924643	ENSDARG00000060246|ENSDARG00000016963|ENSDARG00000030472|ENSDARG00000104687|ENSDARG00000028583|ENSDARG00000055342|ENSDARG00000045051	http://amigo.geneontology.org/amigo/term/GO:0015718	amino acid transport	BP
glycine transport	Gene Ontology	GO:0015816	3	5	0.0133686	0.174229	ENSDARG00000075618|ENSDARG00000014587|ENSDARG00000018534	http://amigo.geneontology.org/amigo/term/GO:0015816	amino acid transport	BP
phospholipid transport	Gene Ontology	GO:0015914	7	28	0.0212976	0.205265	ENSDARG00000039490|ENSDARG00000008413|ENSDARG00000044091|ENSDARG00000077492|ENSDARG00000101094|ENSDARG00000055288|ENSDARG00000042285	http://amigo.geneontology.org/amigo/term/GO:0015914	amino acid transport	BP
L-arginine import across plasma membrane	Gene Ontology	GO:0097638	3	6	0.0215209	0.205265	ENSDARG00000061566|ENSDARG00000100227|ENSDARG00000099111	http://amigo.geneontology.org/amigo/term/GO:0097638	amino acid transport	BP
L-ornithine transmembrane transport	Gene Ontology	GO:1903352	3	6	0.0215209	0.205265	ENSDARG00000061566|ENSDARG00000100227|ENSDARG00000099111	http://amigo.geneontology.org/amigo/term/GO:1903352	amino acid transport	BP
neutral amino acid transport	Gene Ontology	GO:0015804	3	7	0.0318494	0.242751	ENSDARG00000075831|ENSDARG00000008100|ENSDARG00000061120	http://amigo.geneontology.org/amigo/term/GO:0015804	amino acid transport	BP
phospholipid translocation	Gene Ontology	GO:0045332	5	20	0.0476346	0.314	ENSDARG00000077492|ENSDARG00000115869|ENSDARG00000101094|ENSDARG00000008413|ENSDARG00000042285	http://amigo.geneontology.org/amigo/term/GO:0045332	amino acid transport	BP
membrane	Gene Ontology	GO:0016020	725	6090	1.63467e-10	1.60336e-07	ENSDARG00000023237|ENSDARG00000068181|ENSDARG00000055092|ENSDARG00000019897|ENSDARG00000103951|ENSDARG00000077492|ENSDARG00000051874|ENSDARG00000039234|ENSDARG00000056379|ENSDARG00000077419|ENSDARG00000096445|ENSDARG00000013161|ENSDARG00000101043|ENSDARG00000020798|ENSDARG00000086911|ENSDARG00000057064|ENSDARG00000069199|ENSDARG00000088263|ENSDARG00000062974|ENSDARG00000068182|ENSDARG00000111235|…	http://amigo.geneontology.org/amigo/term/GO:0016020	membrane	CC
bicellular tight junction	Gene Ontology	GO:0005923	20	68	1.95551e-05	0.00301679	ENSDARG00000043128|ENSDARG00000015955|ENSDARG00000009544|ENSDARG00000076496|ENSDARG00000077506|ENSDARG00000043133|ENSDARG00000014047|ENSDARG00000079555|ENSDARG00000040628|ENSDARG00000036376|ENSDARG00000054616|ENSDARG00000021590|ENSDARG00000005232|ENSDARG00000112049|ENSDARG00000016081|ENSDARG00000061948|ENSDARG00000028096|ENSDARG00000057826|ENSDARG00000069888|ENSDARG00000069503	http://amigo.geneontology.org/amigo/term/GO:0005923	bicellular tight junction	CC
plasma membrane	Gene Ontology	GO:0005886	246	1994	8.48088e-05	0.00885192	ENSDARG00000060841|ENSDARG00000015955|ENSDARG00000013161|ENSDARG00000037746|ENSDARG00000019932|ENSDARG00000063314|ENSDARG00000051876|ENSDARG00000079361|ENSDARG00000061732|ENSDARG00000039034|ENSDARG00000073881|ENSDARG00000062632|ENSDARG00000068628|ENSDARG00000077492|ENSDARG00000087863|ENSDARG00000057064|ENSDARG00000100534|ENSDARG00000013871|ENSDARG00000102565|ENSDARG00000099342|ENSDARG00000025478|…	http://amigo.geneontology.org/amigo/term/GO:0005886	apical plasma membrane	CC
intermediate filament	Gene Ontology	GO:0005882	19	70	8.81412e-05	0.00885192	ENSDARG00000094041|ENSDARG00000057881|ENSDARG00000005221|ENSDARG00000058462|ENSDARG00000069046|ENSDARG00000017624|ENSDARG00000000212|ENSDARG00000036830|ENSDARG00000028306|ENSDARG00000053248|ENSDARG00000103459|ENSDARG00000043242|ENSDARG00000022309|ENSDARG00000011998|ENSDARG00000012426|ENSDARG00000013415|ENSDARG00000058371|ENSDARG00000071518|ENSDARG00000101043	http://amigo.geneontology.org/amigo/term/GO:0005882	intermediate filament	CC
NADPH oxidase complex	Gene Ontology	GO:0043020	5	7	0.000693007	0.0328657	ENSDARG00000062632|ENSDARG00000087574|ENSDARG00000056615|ENSDARG00000005821|ENSDARG00000040812	http://amigo.geneontology.org/amigo/term/GO:0043020	NADPH oxidase complex	CC
cell junction	Gene Ontology	GO:0030054	38	233	0.00188041	0.0605736	ENSDARG00000043128|ENSDARG00000015955|ENSDARG00000005232|ENSDARG00000094990|ENSDARG00000017321|ENSDARG00000061543|ENSDARG00000069139|ENSDARG00000032714|ENSDARG00000014047|ENSDARG00000079555|ENSDARG00000040628|ENSDARG00000054616|ENSDARG00000104550|ENSDARG00000076789|ENSDARG00000074121|ENSDARG00000003113|ENSDARG00000009544|ENSDARG00000033666|ENSDARG00000073869|ENSDARG00000069503|ENSDARG00000034207|…	http://amigo.geneontology.org/amigo/term/GO:0030054	cell junction	CC
actin cytoskeleton	Gene Ontology	GO:0015629	21	105	0.00196788	0.0609594	ENSDARG00000074575|ENSDARG00000106873|ENSDARG00000045064|ENSDARG00000042535|ENSDARG00000078734|ENSDARG00000061579|ENSDARG00000062003|ENSDARG00000101441|ENSDARG00000058946|ENSDARG00000044694|ENSDARG00000012972|ENSDARG00000033466|ENSDARG00000009133|ENSDARG00000037266|ENSDARG00000055618|ENSDARG00000102441|ENSDARG00000104235|ENSDARG00000036371|ENSDARG00000039142|ENSDARG00000037746|ENSDARG00000045262	http://amigo.geneontology.org/amigo/term/GO:0015629	intermediate filament	CC
keratin filament	Gene Ontology	GO:0045095	5	9	0.00207764	0.0609594	ENSDARG00000060830|ENSDARG00000017624|ENSDARG00000043242|ENSDARG00000058371|ENSDARG00000058462	http://amigo.geneontology.org/amigo/term/GO:0045095	intermediate filament	CC
apical plasma membrane	Gene Ontology	GO:0016324	16	72	0.00236507	0.0651269	ENSDARG00000014098|ENSDARG00000038089|ENSDARG00000012903|ENSDARG00000055253|ENSDARG00000041107|ENSDARG00000055656|ENSDARG00000040568|ENSDARG00000094181|ENSDARG00000003865|ENSDARG00000034007|ENSDARG00000055313|ENSDARG00000022261|ENSDARG00000013855|ENSDARG00000012829|ENSDARG00000028173|ENSDARG00000079900	http://amigo.geneontology.org/amigo/term/GO:0016324	apical plasma membrane	CC
extracellular region	Gene Ontology	GO:0005576	84	646	0.00546425	0.109754	ENSDARG00000042934|ENSDARG00000014907|ENSDARG00000102776|ENSDARG00000101914|ENSDARG00000056874|ENSDARG00000095378|ENSDARG00000058003|ENSDARG00000102175|ENSDARG00000020072|ENSDARG00000007425|ENSDARG00000088595|ENSDARG00000052895|ENSDARG00000095939|ENSDARG00000075159|ENSDARG00000034895|ENSDARG00000103466|ENSDARG00000115610|ENSDARG00000036282|ENSDARG00000071107|ENSDARG00000040944|ENSDARG00000045378|…	http://amigo.geneontology.org/amigo/term/GO:0005576	extracellular region	CC
sarcoplasmic reticulum	Gene Ontology	GO:0016529	6	17	0.00702162	0.126189	ENSDARG00000014098|ENSDARG00000074149|ENSDARG00000020072|ENSDARG00000058603|ENSDARG00000068888|ENSDARG00000028625	http://amigo.geneontology.org/amigo/term/GO:0016529	sarcoplasmic reticulum	CC
extracellular space	Gene Ontology	GO:0005615	105	851	0.00903552	0.140936	ENSDARG00000025254|ENSDARG00000093628|ENSDARG00000071107|ENSDARG00000040251|ENSDARG00000062707|ENSDARG00000098700|ENSDARG00000044827|ENSDARG00000034895|ENSDARG00000068275|ENSDARG00000090185|ENSDARG00000030598|ENSDARG00000039351|ENSDARG00000012945|ENSDARG00000070442|ENSDARG00000058389|ENSDARG00000090267|ENSDARG00000101990|ENSDARG00000034718|ENSDARG00000101914|ENSDARG00000090873|ENSDARG00000074656|…	http://amigo.geneontology.org/amigo/term/GO:0005615	extracellular space	CC
adherens junction	Gene Ontology	GO:0005912	15	77	0.00998681	0.149565	ENSDARG00000094181|ENSDARG00000005232|ENSDARG00000076496|ENSDARG00000027600|ENSDARG00000061543|ENSDARG00000062831|ENSDARG00000018923|ENSDARG00000079555|ENSDARG00000070787|ENSDARG00000061371|ENSDARG00000103607|ENSDARG00000077419|ENSDARG00000102441|ENSDARG00000068973|ENSDARG00000079900	http://amigo.geneontology.org/amigo/term/GO:0005912	bicellular tight junction	CC
integrin complex	Gene Ontology	GO:0008305	8	31	0.0121446	0.167787	ENSDARG00000057787|ENSDARG00000002956|ENSDARG00000062974|ENSDARG00000098899|ENSDARG00000104484|ENSDARG00000002494|ENSDARG00000042282|ENSDARG00000028507	http://amigo.geneontology.org/amigo/term/GO:0008305	NADPH oxidase complex	CC
autophagosome membrane	Gene Ontology	GO:0000421	6	20	0.0145695	0.181565	ENSDARG00000075727|ENSDARG00000053448|ENSDARG00000034403|ENSDARG00000101127|ENSDARG00000068465|ENSDARG00000091558	http://amigo.geneontology.org/amigo/term/GO:0000421	autophagosome membrane	CC
cytosol	Gene Ontology	GO:0005829	101	832	0.0153453	0.187135	ENSDARG00000098946|ENSDARG00000055092|ENSDARG00000061732|ENSDARG00000010266|ENSDARG00000011665|ENSDARG00000041895|ENSDARG00000101127|ENSDARG00000055713|ENSDARG00000104976|ENSDARG00000005821|ENSDARG00000019702|ENSDARG00000024546|ENSDARG00000016505|ENSDARG00000071475|ENSDARG00000039452|ENSDARG00000078751|ENSDARG00000004034|ENSDARG00000021924|ENSDARG00000068732|ENSDARG00000079315|ENSDARG00000054666|…	http://amigo.geneontology.org/amigo/term/GO:0005829	cytosol	CC
perinuclear region of cytoplasm	Gene Ontology	GO:0048471	15	83	0.0182864	0.193915	ENSDARG00000098853|ENSDARG00000014793|ENSDARG00000056112|ENSDARG00000024746|ENSDARG00000093628|ENSDARG00000002663|ENSDARG00000090654|ENSDARG00000055678|ENSDARG00000032344|ENSDARG00000101181|ENSDARG00000038814|ENSDARG00000074163|ENSDARG00000070470|ENSDARG00000040534|ENSDARG00000003699	http://amigo.geneontology.org/amigo/term/GO:0048471	perinuclear region of cytoplasm	CC
basolateral plasma membrane	Gene Ontology	GO:0016323	8	34	0.0198662	0.205265	ENSDARG00000014098|ENSDARG00000087863|ENSDARG00000027279|ENSDARG00000009018|ENSDARG00000001767|ENSDARG00000040534|ENSDARG00000028173|ENSDARG00000054423	http://amigo.geneontology.org/amigo/term/GO:0016323	apical plasma membrane	CC
phosphatidylinositol 3-kinase complex	Gene Ontology	GO:0005942	7	29	0.0251164	0.21767	ENSDARG00000017757|ENSDARG00000060841|ENSDARG00000075456|ENSDARG00000025428|ENSDARG00000075253|ENSDARG00000102762|ENSDARG00000038095	http://amigo.geneontology.org/amigo/term/GO:0005942	NADPH oxidase complex	CC
actin filament	Gene Ontology	GO:0005884	9	43	0.0271328	0.229324	ENSDARG00000094792|ENSDARG00000023963|ENSDARG00000045880|ENSDARG00000039272|ENSDARG00000009336|ENSDARG00000078803|ENSDARG00000009727|ENSDARG00000071084|ENSDARG00000037746	http://amigo.geneontology.org/amigo/term/GO:0005884	intermediate filament	CC
extrinsic component of cytoplasmic side of plasma membrane	Gene Ontology	GO:0031234	9	44	0.0307207	0.242751	ENSDARG00000022841|ENSDARG00000027807|ENSDARG00000059956|ENSDARG00000011449|ENSDARG00000041947|ENSDARG00000077783|ENSDARG00000058647|ENSDARG00000069433|ENSDARG00000067916	http://amigo.geneontology.org/amigo/term/GO:0031234	NADPH oxidase complex	CC
microvillus	Gene Ontology	GO:0005902	6	24	0.0316939	0.242751	ENSDARG00000078734|ENSDARG00000009133|ENSDARG00000017047|ENSDARG00000034007|ENSDARG00000102441|ENSDARG00000061579	http://amigo.geneontology.org/amigo/term/GO:0005902	microvillus	CC
plasma membrane signaling receptor complex	Gene Ontology	GO:0098802	3	7	0.0318494	0.242751	ENSDARG00000069482|ENSDARG00000022000|ENSDARG00000101036	http://amigo.geneontology.org/amigo/term/GO:0098802	NADPH oxidase complex	CC
phosphatidylinositol 3-kinase complex, class IB	Gene Ontology	GO:0005944	3	7	0.0318494	0.242751	ENSDARG00000017757|ENSDARG00000102762|ENSDARG00000075456	http://amigo.geneontology.org/amigo/term/GO:0005944	NADPH oxidase complex	CC
receptor complex	Gene Ontology	GO:0043235	20	131	0.0354863	0.264565	ENSDARG00000020080|ENSDARG00000016570|ENSDARG00000045959|ENSDARG00000004586|ENSDARG00000017321|ENSDARG00000087197|ENSDARG00000042861|ENSDARG00000038700|ENSDARG00000058695|ENSDARG00000039436|ENSDARG00000060235|ENSDARG00000080020|ENSDARG00000017354|ENSDARG00000070961|ENSDARG00000055136|ENSDARG00000013847|ENSDARG00000055305|ENSDARG00000043317|ENSDARG00000102742|ENSDARG00000074850	http://amigo.geneontology.org/amigo/term/GO:0043235	receptor complex	CC
integral component of plasma membrane	Gene Ontology	GO:0005887	106	911	0.0358107	0.265305	ENSDARG00000103951|ENSDARG00000077540|ENSDARG00000036383|ENSDARG00000077308|ENSDARG00000031757|ENSDARG00000005823|ENSDARG00000044415|ENSDARG00000074663|ENSDARG00000042861|ENSDARG00000079790|ENSDARG00000051874|ENSDARG00000057049|ENSDARG00000070442|ENSDARG00000059792|ENSDARG00000018534|ENSDARG00000014587|ENSDARG00000079399|ENSDARG00000101910|ENSDARG00000105416|ENSDARG00000037122|ENSDARG00000104550|…	http://amigo.geneontology.org/amigo/term/GO:0005887	apical plasma membrane	CC
cytoskeleton	Gene Ontology	GO:0005856	53	428	0.0481709	0.315228	ENSDARG00000020944|ENSDARG00000038010|ENSDARG00000022841|ENSDARG00000074852|ENSDARG00000037746|ENSDARG00000076496|ENSDARG00000061543|ENSDARG00000074121|ENSDARG00000020625|ENSDARG00000039034|ENSDARG00000062248|ENSDARG00000062390|ENSDARG00000055618|ENSDARG00000101043|ENSDARG00000014098|ENSDARG00000052783|ENSDARG00000045367|ENSDARG00000058128|ENSDARG00000094673|ENSDARG00000011809|ENSDARG00000078803|…	http://amigo.geneontology.org/amigo/term/GO:0005856	intermediate filament	CC
lysosomal membrane	Gene Ontology	GO:0005765	13	79	0.0493592	0.315228	ENSDARG00000068465|ENSDARG00000078363|ENSDARG00000043624|ENSDARG00000037244|ENSDARG00000071250|ENSDARG00000053448|ENSDARG00000034403|ENSDARG00000002285|ENSDARG00000076339|ENSDARG00000038615|ENSDARG00000100420|ENSDARG00000056200|ENSDARG00000091558	http://amigo.geneontology.org/amigo/term/GO:0005765	autophagosome membrane	CC
trans-Golgi network	Gene Ontology	GO:0005802	13	79	0.0493592	0.315228	ENSDARG00000019962|ENSDARG00000033666|ENSDARG00000008413|ENSDARG00000102599|ENSDARG00000101094|ENSDARG00000044341|ENSDARG00000042759|ENSDARG00000017606|ENSDARG00000002217|ENSDARG00000042285|ENSDARG00000115869|ENSDARG00000061357|ENSDARG00000003699	http://amigo.geneontology.org/amigo/term/GO:0005802	trans-Golgi network	CC
sarcomere	Gene Ontology	GO:0030017	4	14	0.0494826	0.315228	ENSDARG00000014098|ENSDARG00000104817|ENSDARG00000075433|ENSDARG00000099889	http://amigo.geneontology.org/amigo/term/GO:0030017	intermediate filament	CC
phosphatidylinositol binding	Gene Ontology	GO:0035091	27	84	1.42865e-07	6.0978e-05	ENSDARG00000060841|ENSDARG00000063195|ENSDARG00000052522|ENSDARG00000074149|ENSDARG00000104103|ENSDARG00000044246|ENSDARG00000033735|ENSDARG00000056374|ENSDARG00000039490|ENSDARG00000004405|ENSDARG00000044091|ENSDARG00000041294|ENSDARG00000074393|ENSDARG00000040812|ENSDARG00000105424|ENSDARG00000062460|ENSDARG00000040474|ENSDARG00000057125|ENSDARG00000091418|ENSDARG00000040309|ENSDARG00000022659|…	http://amigo.geneontology.org/amigo/term/GO:0035091	phosphatidylinositol binding	MF
transmembrane transporter activity	Gene Ontology	GO:0022857	48	236	2.86985e-06	0.000699952	ENSDARG00000005335|ENSDARG00000015033|ENSDARG00000061566|ENSDARG00000035459|ENSDARG00000044528|ENSDARG00000100315|ENSDARG00000020278|ENSDARG00000099265|ENSDARG00000058731|ENSDARG00000057949|ENSDARG00000013871|ENSDARG00000074561|ENSDARG00000088263|ENSDARG00000055523|ENSDARG00000055342|ENSDARG00000061120|ENSDARG00000062182|ENSDARG00000005894|ENSDARG00000019932|ENSDARG00000055226|ENSDARG00000057427|…	http://amigo.geneontology.org/amigo/term/GO:0022857	ligand-gated calcium channel activity	MF
structural molecule activity	Gene Ontology	GO:0005198	28	114	1.34727e-05	0.00279622	ENSDARG00000043128|ENSDARG00000015955|ENSDARG00000014047|ENSDARG00000000212|ENSDARG00000040628|ENSDARG00000054616|ENSDARG00000012426|ENSDARG00000101043|ENSDARG00000009544|ENSDARG00000102441|ENSDARG00000069888|ENSDARG00000069503|ENSDARG00000022698|ENSDARG00000069046|ENSDARG00000043133|ENSDARG00000070787|ENSDARG00000011998|ENSDARG00000103459|ENSDARG00000016081|ENSDARG00000036830|ENSDARG00000028306|…	http://amigo.geneontology.org/amigo/term/GO:0005198	structural molecule activity	MF
actin filament binding	Gene Ontology	GO:0051015	38	200	0.000116512	0.0110263	ENSDARG00000023237|ENSDARG00000005210|ENSDARG00000062003|ENSDARG00000039272|ENSDARG00000078888|ENSDARG00000051876|ENSDARG00000012972|ENSDARG00000055713|ENSDARG00000032630|ENSDARG00000090637|ENSDARG00000023963|ENSDARG00000063295|ENSDARG00000039034|ENSDARG00000094792|ENSDARG00000078803|ENSDARG00000051768|ENSDARG00000012586|ENSDARG00000093112|ENSDARG00000045880|ENSDARG00000102441|ENSDARG00000100972|…	http://amigo.geneontology.org/amigo/term/GO:0051015	actin filament binding	MF
L-amino acid transmembrane transporter activity	Gene Ontology	GO:0015179	8	15	0.000139784	0.0119326	ENSDARG00000099265|ENSDARG00000005894|ENSDARG00000008100|ENSDARG00000061120|ENSDARG00000055226|ENSDARG00000020278|ENSDARG00000075831|ENSDARG00000054423	http://amigo.geneontology.org/amigo/term/GO:0015179	L-amino acid transmembrane transporter activity	MF
kinase activity	Gene Ontology	GO:0016301	93	652	0.000234603	0.0160214	ENSDARG00000060841|ENSDARG00000031698|ENSDARG00000033437|ENSDARG00000045150|ENSDARG00000060596|ENSDARG00000056112|ENSDARG00000070448|ENSDARG00000036056|ENSDARG00000005416|ENSDARG00000089856|ENSDARG00000039452|ENSDARG00000060504|ENSDARG00000060184|ENSDARG00000004877|ENSDARG00000058381|ENSDARG00000032932|ENSDARG00000055305|ENSDARG00000060116|ENSDARG00000059406|ENSDARG00000077783|ENSDARG00000002552|…	http://amigo.geneontology.org/amigo/term/GO:0016301	protein tyrosine kinase activity	MF
protein tyrosine kinase activity	Gene Ontology	GO:0004713	24	110	0.000301781	0.0198164	ENSDARG00000022841|ENSDARG00000004586|ENSDARG00000017321|ENSDARG00000087197|ENSDARG00000042861|ENSDARG00000060235|ENSDARG00000020625|ENSDARG00000013847|ENSDARG00000062082|ENSDARG00000011449|ENSDARG00000055305|ENSDARG00000043317|ENSDARG00000067916|ENSDARG00000020080|ENSDARG00000020326|ENSDARG00000059956|ENSDARG00000058647|ENSDARG00000089856|ENSDARG00000027807|ENSDARG00000058695|ENSDARG00000017354|…	http://amigo.geneontology.org/amigo/term/GO:0004713	protein tyrosine kinase activity	MF
phosphatidylinositol-3-phosphate binding	Gene Ontology	GO:0032266	10	28	0.000527265	0.0300042	ENSDARG00000056374|ENSDARG00000041294|ENSDARG00000068465|ENSDARG00000053448|ENSDARG00000034403|ENSDARG00000060430|ENSDARG00000040812|ENSDARG00000033735|ENSDARG00000037804|ENSDARG00000091558	http://amigo.geneontology.org/amigo/term/GO:0032266	phosphatidylinositol binding	MF
calmodulin binding	Gene Ontology	GO:0005516	20	89	0.000643314	0.0323037	ENSDARG00000031976|ENSDARG00000111612|ENSDARG00000018411|ENSDARG00000069361|ENSDARG00000035858|ENSDARG00000099385|ENSDARG00000068246|ENSDARG00000051874|ENSDARG00000078888|ENSDARG00000005372|ENSDARG00000040087|ENSDARG00000057000|ENSDARG00000026925|ENSDARG00000039034|ENSDARG00000060116|ENSDARG00000030604|ENSDARG00000002552|ENSDARG00000030687|ENSDARG00000014962|ENSDARG00000102398	http://amigo.geneontology.org/amigo/term/GO:0005516	calmodulin binding	MF
actin binding	Gene Ontology	GO:0003779	44	274	0.00117637	0.0507301	ENSDARG00000020944|ENSDARG00000063195|ENSDARG00000062003|ENSDARG00000099385|ENSDARG00000039272|ENSDARG00000068973|ENSDARG00000090785|ENSDARG00000092281|ENSDARG00000012972|ENSDARG00000055713|ENSDARG00000032630|ENSDARG00000001431|ENSDARG00000090637|ENSDARG00000079591|ENSDARG00000058128|ENSDARG00000027600|ENSDARG00000011809|ENSDARG00000063295|ENSDARG00000012586|ENSDARG00000104181|ENSDARG00000037266|…	http://amigo.geneontology.org/amigo/term/GO:0003779	actin filament binding	MF
superoxide-generating NAD(P)H oxidase activity	Gene Ontology	GO:0016175	5	8	0.00124798	0.0507301	ENSDARG00000087574|ENSDARG00000056374|ENSDARG00000056615|ENSDARG00000062632|ENSDARG00000033735	http://amigo.geneontology.org/amigo/term/GO:0016175	superoxide-generating NAD(P)H oxidase activity	MF
L-ornithine transmembrane transporter activity	Gene Ontology	GO:0000064	5	8	0.00124798	0.0507301	ENSDARG00000062271|ENSDARG00000063539|ENSDARG00000061566|ENSDARG00000100227|ENSDARG00000099111	http://amigo.geneontology.org/amigo/term/GO:0000064	L-amino acid transmembrane transporter activity	MF
ATP binding	Gene Ontology	GO:0005524	183	1507	0.00141033	0.0547237	ENSDARG00000037746|ENSDARG00000021787|ENSDARG00000031698|ENSDARG00000016200|ENSDARG00000079361|ENSDARG00000022841|ENSDARG00000042861|ENSDARG00000033437|ENSDARG00000045150|ENSDARG00000060596|ENSDARG00000077492|ENSDARG00000087646|ENSDARG00000056112|ENSDARG00000097615|ENSDARG00000043561|ENSDARG00000036056|ENSDARG00000076075|ENSDARG00000005416|ENSDARG00000026400|ENSDARG00000055540|ENSDARG00000104139|…	http://amigo.geneontology.org/amigo/term/GO:0005524	nucleotide binding	MF
CARD domain binding	Gene Ontology	GO:0050700	4	5	0.00158273	0.0562953	ENSDARG00000104290|ENSDARG00000067672|ENSDARG00000103485|ENSDARG00000052741	http://amigo.geneontology.org/amigo/term/GO:0050700	CARD domain binding	MF
protein kinase activity	Gene Ontology	GO:0004672	86	634	0.00166155	0.0578927	ENSDARG00000031698|ENSDARG00000016200|ENSDARG00000078222|ENSDARG00000033437|ENSDARG00000045150|ENSDARG00000060596|ENSDARG00000100534|ENSDARG00000070448|ENSDARG00000036056|ENSDARG00000005416|ENSDARG00000089856|ENSDARG00000060184|ENSDARG00000004877|ENSDARG00000057000|ENSDARG00000058381|ENSDARG00000055305|ENSDARG00000060116|ENSDARG00000059406|ENSDARG00000028676|ENSDARG00000077783|ENSDARG00000002552|…	http://amigo.geneontology.org/amigo/term/GO:0004672	protein tyrosine kinase activity	MF
calcium ion binding	Gene Ontology	GO:0005509	85	626	0.00171566	0.0580193	ENSDARG00000074149|ENSDARG00000025254|ENSDARG00000053636|ENSDARG00000014793|ENSDARG00000093413|ENSDARG00000036175|ENSDARG00000055305|ENSDARG00000077938|ENSDARG00000059900|ENSDARG00000093628|ENSDARG00000039272|ENSDARG00000038123|ENSDARG00000004748|ENSDARG00000055592|ENSDARG00000055715|ENSDARG00000001414|ENSDARG00000078217|ENSDARG00000009471|ENSDARG00000076250|ENSDARG00000062430|ENSDARG00000001431|…	http://amigo.geneontology.org/amigo/term/GO:0005509	calcium ion binding	MF
superoxide-generating NADPH oxidase activator activity	Gene Ontology	GO:0016176	5	9	0.00207764	0.0609594	ENSDARG00000033735|ENSDARG00000056374|ENSDARG00000041294|ENSDARG00000005821|ENSDARG00000040812	http://amigo.geneontology.org/amigo/term/GO:0016176	superoxide-generating NADPH oxidase activator activity	MF
nucleotide binding	Gene Ontology	GO:0000166	174	1440	0.0022385	0.0636961	ENSDARG00000013161|ENSDARG00000037746|ENSDARG00000021787|ENSDARG00000074163|ENSDARG00000079361|ENSDARG00000033437|ENSDARG00000045150|ENSDARG00000060596|ENSDARG00000077492|ENSDARG00000056112|ENSDARG00000097615|ENSDARG00000043561|ENSDARG00000016364|ENSDARG00000076075|ENSDARG00000005416|ENSDARG00000104139|ENSDARG00000089856|ENSDARG00000039452|ENSDARG00000042535|ENSDARG00000060184|ENSDARG00000021647|…	http://amigo.geneontology.org/amigo/term/GO:0000166	nucleotide binding	MF
signaling receptor binding	Gene Ontology	GO:0005102	28	158	0.002294	0.0642052	ENSDARG00000071462|ENSDARG00000022841|ENSDARG00000078643|ENSDARG00000116066|ENSDARG00000090783|ENSDARG00000071107|ENSDARG00000019686|ENSDARG00000014098|ENSDARG00000069199|ENSDARG00000094012|ENSDARG00000038682|ENSDARG00000086585|ENSDARG00000011449|ENSDARG00000044827|ENSDARG00000067916|ENSDARG00000012071|ENSDARG00000019861|ENSDARG00000059956|ENSDARG00000012945|ENSDARG00000056798|ENSDARG00000096586|…	http://amigo.geneontology.org/amigo/term/GO:0005102	signaling receptor binding	MF
glycine transmembrane transporter activity	Gene Ontology	GO:0015187	4	6	0.00304099	0.0798747	ENSDARG00000075618|ENSDARG00000014587|ENSDARG00000018534|ENSDARG00000059805	http://amigo.geneontology.org/amigo/term/GO:0015187	L-amino acid transmembrane transporter activity	MF
protein-glutamine gamma-glutamyltransferase activity	Gene Ontology	GO:0003810	5	10	0.00325126	0.0828485	ENSDARG00000017799|ENSDARG00000102106|ENSDARG00000101595|ENSDARG00000074094|ENSDARG00000098837	http://amigo.geneontology.org/amigo/term/GO:0003810	protein-glutamine gamma-glutamyltransferase activity	MF
transferase activity	Gene Ontology	GO:0016740	175	1466	0.00350463	0.0867161	ENSDARG00000060841|ENSDARG00000044514|ENSDARG00000031698|ENSDARG00000061520|ENSDARG00000033437|ENSDARG00000045150|ENSDARG00000060596|ENSDARG00000060768|ENSDARG00000006019|ENSDARG00000015449|ENSDARG00000056112|ENSDARG00000069543|ENSDARG00000071501|ENSDARG00000005416|ENSDARG00000089856|ENSDARG00000039452|ENSDARG00000060504|ENSDARG00000060184|ENSDARG00000007430|ENSDARG00000030598|ENSDARG00000004877|…	http://amigo.geneontology.org/amigo/term/GO:0016740	transferase activity	MF
monocarboxylic acid transmembrane transporter activity	Gene Ontology	GO:0008028	7	20	0.00387364	0.0924643	ENSDARG00000060246|ENSDARG00000016963|ENSDARG00000030472|ENSDARG00000104687|ENSDARG00000028583|ENSDARG00000055342|ENSDARG00000045051	http://amigo.geneontology.org/amigo/term/GO:0008028	L-amino acid transmembrane transporter activity	MF
cytokine receptor activity	Gene Ontology	GO:0004896	12	50	0.00435998	0.0992501	ENSDARG00000016570|ENSDARG00000087863|ENSDARG00000074850|ENSDARG00000099342|ENSDARG00000045959|ENSDARG00000078970|ENSDARG00000005673|ENSDARG00000039436|ENSDARG00000080020|ENSDARG00000070961|ENSDARG00000032571|ENSDARG00000074771	http://amigo.geneontology.org/amigo/term/GO:0004896	cytokine receptor activity	MF
tumor necrosis factor receptor binding	Gene Ontology	GO:0005164	8	26	0.00449825	0.10105	ENSDARG00000068141|ENSDARG00000022000|ENSDARG00000020483|ENSDARG00000101036|ENSDARG00000012945|ENSDARG00000093048|ENSDARG00000009511|ENSDARG00000069482	http://amigo.geneontology.org/amigo/term/GO:0005164	tumor necrosis factor receptor binding	MF
cytokine activity	Gene Ontology	GO:0005125	22	122	0.00520789	0.106129	ENSDARG00000095378|ENSDARG00000091003|ENSDARG00000089383|ENSDARG00000071107|ENSDARG00000009511|ENSDARG00000037859|ENSDARG00000101040|ENSDARG00000058557|ENSDARG00000098700|ENSDARG00000040777|ENSDARG00000012671|ENSDARG00000044827|ENSDARG00000034895|ENSDARG00000030598|ENSDARG00000104795|ENSDARG00000102908|ENSDARG00000058389|ENSDARG00000078147|ENSDARG00000095939|ENSDARG00000102211|ENSDARG00000098752|…	http://amigo.geneontology.org/amigo/term/GO:0005125	tumor necrosis factor receptor binding	MF
phosphatidylinositol-3,4-bisphosphate binding	Gene Ontology	GO:0043325	4	7	0.00522162	0.106129	ENSDARG00000012513|ENSDARG00000102458|ENSDARG00000037804|ENSDARG00000033735	http://amigo.geneontology.org/amigo/term/GO:0043325	phosphatidylinositol-3,4-bisphosphate binding	MF
sphingosine-1-phosphate receptor activity	Gene Ontology	GO:0038036	4	7	0.00522162	0.106129	ENSDARG00000042470|ENSDARG00000074851|ENSDARG00000042690|ENSDARG00000040526	http://amigo.geneontology.org/amigo/term/GO:0038036	sphingosine-1-phosphate receptor activity	MF
phosphotyrosine residue binding	Gene Ontology	GO:0001784	4	7	0.00522162	0.106129	ENSDARG00000062109|ENSDARG00000078217|ENSDARG00000100342|ENSDARG00000087956	http://amigo.geneontology.org/amigo/term/GO:0001784	phosphotyrosine residue binding	MF
Rho GTPase binding	Gene Ontology	GO:0017048	7	22	0.00640989	0.125788	ENSDARG00000023724|ENSDARG00000004877|ENSDARG00000003865|ENSDARG00000090785|ENSDARG00000012586|ENSDARG00000055713|ENSDARG00000104118	http://amigo.geneontology.org/amigo/term/GO:0017048	small GTPase binding	MF
phosphatidylinositol kinase activity	Gene Ontology	GO:0052742	5	12	0.0069124	0.126189	ENSDARG00000075253|ENSDARG00000017757|ENSDARG00000075456|ENSDARG00000062823|ENSDARG00000060841	http://amigo.geneontology.org/amigo/term/GO:0052742	protein tyrosine kinase activity	MF
carbohydrate derivative binding	Gene Ontology	GO:0097367	5	12	0.0069124	0.126189	ENSDARG00000038682|ENSDARG00000044094|ENSDARG00000116066|ENSDARG00000096586|ENSDARG00000090783	http://amigo.geneontology.org/amigo/term/GO:0097367	carbohydrate derivative binding	MF
guanyl-nucleotide exchange factor activity	Gene Ontology	GO:0005085	25	149	0.00732542	0.129711	ENSDARG00000016981|ENSDARG00000025902|ENSDARG00000075111|ENSDARG00000074121|ENSDARG00000076924|ENSDARG00000062485|ENSDARG00000062855|ENSDARG00000075964|ENSDARG00000079286|ENSDARG00000037554|ENSDARG00000095180|ENSDARG00000000161|ENSDARG00000061459|ENSDARG00000074307|ENSDARG00000062385|ENSDARG00000007711|ENSDARG00000101752|ENSDARG00000036420|ENSDARG00000061796|ENSDARG00000044718|ENSDARG00000042329|…	http://amigo.geneontology.org/amigo/term/GO:0005085	tumor necrosis factor receptor binding	MF
non-membrane spanning protein tyrosine kinase activity	Gene Ontology	GO:0004715	11	47	0.00736954	0.129711	ENSDARG00000022841|ENSDARG00000067916|ENSDARG00000027807|ENSDARG00000020326|ENSDARG00000059956|ENSDARG00000020625|ENSDARG00000041947|ENSDARG00000077783|ENSDARG00000058647|ENSDARG00000069433|ENSDARG00000011449	http://amigo.geneontology.org/amigo/term/GO:0004715	protein tyrosine kinase activity	MF
1-phosphatidylinositol-4-phosphate 3-kinase activity	Gene Ontology	GO:0035005	4	8	0.00825843	0.136889	ENSDARG00000075253|ENSDARG00000017757|ENSDARG00000075456|ENSDARG00000060841	http://amigo.geneontology.org/amigo/term/GO:0035005	protein tyrosine kinase activity	MF
L-lysine transmembrane transporter activity	Gene Ontology	GO:0015189	4	8	0.00825843	0.136889	ENSDARG00000061566|ENSDARG00000043624|ENSDARG00000100227|ENSDARG00000099111	http://amigo.geneontology.org/amigo/term/GO:0015189	L-amino acid transmembrane transporter activity	MF
neutral amino acid transmembrane transporter activity	Gene Ontology	GO:0015175	4	8	0.00825843	0.136889	ENSDARG00000075831|ENSDARG00000008100|ENSDARG00000061120|ENSDARG00000044528	http://amigo.geneontology.org/amigo/term/GO:0015175	L-amino acid transmembrane transporter activity	MF
metallopeptidase activity	Gene Ontology	GO:0008237	21	120	0.00853232	0.138723	ENSDARG00000037533|ENSDARG00000068181|ENSDARG00000016918|ENSDARG00000089887|ENSDARG00000067545|ENSDARG00000001452|ENSDARG00000008388|ENSDARG00000093093|ENSDARG00000103519|ENSDARG00000057064|ENSDARG00000010070|ENSDARG00000007709|ENSDARG00000040683|ENSDARG00000057644|ENSDARG00000036809|ENSDARG00000029747|ENSDARG00000035514|ENSDARG00000042816|ENSDARG00000103878|ENSDARG00000041982|ENSDARG00000010556	http://amigo.geneontology.org/amigo/term/GO:0008237	metallopeptidase activity	MF
serine-type endopeptidase activity	Gene Ontology	GO:0004252	26	159	0.00861288	0.138723	ENSDARG00000014907|ENSDARG00000074185|ENSDARG00000051890|ENSDARG00000096975|ENSDARG00000004748|ENSDARG00000056324|ENSDARG00000069833|ENSDARG00000078751|ENSDARG00000053323|ENSDARG00000100792|ENSDARG00000062707|ENSDARG00000090730|ENSDARG00000030967|ENSDARG00000061858|ENSDARG00000052895|ENSDARG00000061173|ENSDARG00000075265|ENSDARG00000056798|ENSDARG00000090267|ENSDARG00000101990|ENSDARG00000103117|…	http://amigo.geneontology.org/amigo/term/GO:0004252	metallopeptidase activity	MF
calcium-dependent protein binding	Gene Ontology	GO:0048306	6	18	0.00908042	0.140936	ENSDARG00000009978|ENSDARG00000025254|ENSDARG00000093628|ENSDARG00000101181|ENSDARG00000037425|ENSDARG00000089441	http://amigo.geneontology.org/amigo/term/GO:0048306	calcium-dependent protein binding	MF
lysophospholipase activity	Gene Ontology	GO:0004622	5	13	0.00953717	0.144095	ENSDARG00000091633|ENSDARG00000096445|ENSDARG00000024546|ENSDARG00000102887|ENSDARG00000006944	http://amigo.geneontology.org/amigo/term/GO:0004622	lysophospholipase activity	MF
ARF guanyl-nucleotide exchange factor activity	Gene Ontology	GO:0005086	6	19	0.0115973	0.167787	ENSDARG00000007807|ENSDARG00000016551|ENSDARG00000077656|ENSDARG00000076742|ENSDARG00000021488|ENSDARG00000103984	http://amigo.geneontology.org/amigo/term/GO:0005086	tumor necrosis factor receptor binding	MF
arginine transmembrane transporter activity	Gene Ontology	GO:0015181	4	9	0.0122675	0.167787	ENSDARG00000061566|ENSDARG00000043624|ENSDARG00000100227|ENSDARG00000099111	http://amigo.geneontology.org/amigo/term/GO:0015181	L-amino acid transmembrane transporter activity	MF
1-phosphatidylinositol-3-kinase activity	Gene Ontology	GO:0016303	4	9	0.0122675	0.167787	ENSDARG00000075253|ENSDARG00000017757|ENSDARG00000075456|ENSDARG00000060841	http://amigo.geneontology.org/amigo/term/GO:0016303	protein tyrosine kinase activity	MF
calcium-dependent protein serine/threonine kinase activity	Gene Ontology	GO:0009931	4	9	0.0122675	0.167787	ENSDARG00000111612|ENSDARG00000018411|ENSDARG00000002552|ENSDARG00000005372	http://amigo.geneontology.org/amigo/term/GO:0009931	protein tyrosine kinase activity	MF
lactate transmembrane transporter activity	Gene Ontology	GO:0015129	3	5	0.0133686	0.174229	ENSDARG00000016963|ENSDARG00000028583|ENSDARG00000045051	http://amigo.geneontology.org/amigo/term/GO:0015129	L-amino acid transmembrane transporter activity	MF
ligand-gated calcium channel activity	Gene Ontology	GO:0099604	3	5	0.0133686	0.174229	ENSDARG00000059993|ENSDARG00000059792|ENSDARG00000063435	http://amigo.geneontology.org/amigo/term/GO:0099604	ligand-gated calcium channel activity	MF
zinc ion transmembrane transporter activity	Gene Ontology	GO:0005385	6	20	0.0145695	0.181565	ENSDARG00000059361|ENSDARG00000005823|ENSDARG00000005463|ENSDARG00000101434|ENSDARG00000079525|ENSDARG00000103983	http://amigo.geneontology.org/amigo/term/GO:0005385	ligand-gated calcium channel activity	MF
actin-dependent ATPase activity	Gene Ontology	GO:0030898	6	20	0.0145695	0.181565	ENSDARG00000078734|ENSDARG00000062003|ENSDARG00000058946|ENSDARG00000009133|ENSDARG00000061579|ENSDARG00000104235	http://amigo.geneontology.org/amigo/term/GO:0030898	microfilament motor activity	MF
GTP-Rho binding	Gene Ontology	GO:0017049	7	26	0.0149054	0.184405	ENSDARG00000052783|ENSDARG00000060184|ENSDARG00000088130|ENSDARG00000004877|ENSDARG00000031345|ENSDARG00000062390|ENSDARG00000041565	http://amigo.geneontology.org/amigo/term/GO:0017049	small GTPase binding	MF
peptidase inhibitor activity	Gene Ontology	GO:0030414	5	15	0.0166885	0.191044	ENSDARG00000034718|ENSDARG00000061351|ENSDARG00000045378|ENSDARG00000058003|ENSDARG00000040944	http://amigo.geneontology.org/amigo/term/GO:0030414	tumor necrosis factor receptor binding	MF
cytokine binding	Gene Ontology	GO:0019955	8	33	0.0169853	0.191044	ENSDARG00000016570|ENSDARG00000074850|ENSDARG00000045959|ENSDARG00000039436|ENSDARG00000087804|ENSDARG00000080020|ENSDARG00000070961|ENSDARG00000043317	http://amigo.geneontology.org/amigo/term/GO:0019955	cytokine binding	MF
urea transmembrane transporter activity	Gene Ontology	GO:0015204	4	10	0.0173443	0.191044	ENSDARG00000053480|ENSDARG00000003808|ENSDARG00000045141|ENSDARG00000071592	http://amigo.geneontology.org/amigo/term/GO:0015204	L-amino acid transmembrane transporter activity	MF
CXCR chemokine receptor binding	Gene Ontology	GO:0045236	4	10	0.0173443	0.191044	ENSDARG00000075045|ENSDARG00000104795|ENSDARG00000102776|ENSDARG00000114454	http://amigo.geneontology.org/amigo/term/GO:0045236	tumor necrosis factor receptor binding	MF
cation:chloride symporter activity	Gene Ontology	GO:0015377	4	10	0.0173443	0.191044	ENSDARG00000013855|ENSDARG00000055253|ENSDARG00000055313|ENSDARG00000062058	http://amigo.geneontology.org/amigo/term/GO:0015377	L-amino acid transmembrane transporter activity	MF
calcium activated cation channel activity	Gene Ontology	GO:0005227	4	10	0.0173443	0.191044	ENSDARG00000059993|ENSDARG00000059792|ENSDARG00000063435|ENSDARG00000031956	http://amigo.geneontology.org/amigo/term/GO:0005227	ligand-gated calcium channel activity	MF
transcription regulator activity	Gene Ontology	GO:0140110	4	10	0.0173443	0.191044	ENSDARG00000093412|ENSDARG00000040764|ENSDARG00000097473|ENSDARG00000042322	http://amigo.geneontology.org/amigo/term/GO:0140110	transcription regulator activity	MF
microfilament motor activity	Gene Ontology	GO:0000146	6	21	0.0180335	0.192428	ENSDARG00000078734|ENSDARG00000062003|ENSDARG00000058946|ENSDARG00000009133|ENSDARG00000061579|ENSDARG00000104235	http://amigo.geneontology.org/amigo/term/GO:0000146	microfilament motor activity	MF
cell adhesion molecule binding	Gene Ontology	GO:0050839	6	21	0.0180335	0.192428	ENSDARG00000037122|ENSDARG00000077506|ENSDARG00000001452|ENSDARG00000057644|ENSDARG00000104267|ENSDARG00000022309	http://amigo.geneontology.org/amigo/term/GO:0050839	cell adhesion molecule binding	MF
integrin binding	Gene Ontology	GO:0005178	10	47	0.0186657	0.195508	ENSDARG00000042934|ENSDARG00000076685|ENSDARG00000028507|ENSDARG00000024829|ENSDARG00000104484|ENSDARG00000002084|ENSDARG00000002494|ENSDARG00000093413|ENSDARG00000023062|ENSDARG00000052652	http://amigo.geneontology.org/amigo/term/GO:0005178	actin filament binding	MF
chemokine activity	Gene Ontology	GO:0008009	10	47	0.0186657	0.195508	ENSDARG00000104795|ENSDARG00000102776|ENSDARG00000114454|ENSDARG00000058389|ENSDARG00000075045|ENSDARG00000103466|ENSDARG00000115610|ENSDARG00000039351|ENSDARG00000090873|ENSDARG00000101040	http://amigo.geneontology.org/amigo/term/GO:0008009	tumor necrosis factor receptor binding	MF
phosphatidylinositol phospholipase C activity	Gene Ontology	GO:0004435	5	16	0.0213226	0.205265	ENSDARG00000068246|ENSDARG00000059960|ENSDARG00000079253|ENSDARG00000034080|ENSDARG00000062575	http://amigo.geneontology.org/amigo/term/GO:0004435	lysophospholipase activity	MF
sodium ion transmembrane transporter activity	Gene Ontology	GO:0015081	3	6	0.0215209	0.205265	ENSDARG00000013855|ENSDARG00000055253|ENSDARG00000055313	http://amigo.geneontology.org/amigo/term/GO:0015081	ligand-gated calcium channel activity	MF
interleukin-17 receptor activity	Gene Ontology	GO:0030368	3	6	0.0215209	0.205265	ENSDARG00000089131|ENSDARG00000058244|ENSDARG00000105863	http://amigo.geneontology.org/amigo/term/GO:0030368	cytokine receptor activity	MF
sodium:chloride symporter activity	Gene Ontology	GO:0015378	3	6	0.0215209	0.205265	ENSDARG00000013855|ENSDARG00000055253|ENSDARG00000055313	http://amigo.geneontology.org/amigo/term/GO:0015378	L-amino acid transmembrane transporter activity	MF
sodium:potassium:chloride symporter activity	Gene Ontology	GO:0008511	3	6	0.0215209	0.205265	ENSDARG00000013855|ENSDARG00000055253|ENSDARG00000055313	http://amigo.geneontology.org/amigo/term/GO:0008511	L-amino acid transmembrane transporter activity	MF
symporter activity	Gene Ontology	GO:0015293	13	70	0.0220443	0.206254	ENSDARG00000104508|ENSDARG00000052138|ENSDARG00000046091|ENSDARG00000071235|ENSDARG00000032010|ENSDARG00000020212|ENSDARG00000030006|ENSDARG00000003697|ENSDARG00000018534|ENSDARG00000060879|ENSDARG00000098269|ENSDARG00000056719|ENSDARG00000091560	http://amigo.geneontology.org/amigo/term/GO:0015293	L-amino acid transmembrane transporter activity	MF
GTPase activator activity	Gene Ontology	GO:0005096	30	207	0.0228868	0.210621	ENSDARG00000102070|ENSDARG00000059900|ENSDARG00000075110|ENSDARG00000021521|ENSDARG00000051836|ENSDARG00000078119|ENSDARG00000069484|ENSDARG00000062049|ENSDARG00000044339|ENSDARG00000024874|ENSDARG00000098761|ENSDARG00000022187|ENSDARG00000079286|ENSDARG00000062263|ENSDARG00000095180|ENSDARG00000074846|ENSDARG00000061459|ENSDARG00000052496|ENSDARG00000063307|ENSDARG00000078888|ENSDARG00000104295|…	http://amigo.geneontology.org/amigo/term/GO:0005096	tumor necrosis factor receptor binding	MF
acetylglucosaminyltransferase activity	Gene Ontology	GO:0008375	8	35	0.0230787	0.210621	ENSDARG00000099923|ENSDARG00000052376|ENSDARG00000037852|ENSDARG00000012407|ENSDARG00000018971|ENSDARG00000010941|ENSDARG00000038489|ENSDARG00000053133	http://amigo.geneontology.org/amigo/term/GO:0008375	acetylglucosaminyltransferase activity	MF
metalloendopeptidase activity	Gene Ontology	GO:0004222	19	117	0.0235113	0.210621	ENSDARG00000037533|ENSDARG00000029747|ENSDARG00000089887|ENSDARG00000067545|ENSDARG00000001452|ENSDARG00000008388|ENSDARG00000093093|ENSDARG00000103519|ENSDARG00000010070|ENSDARG00000007709|ENSDARG00000040683|ENSDARG00000057644|ENSDARG00000042816|ENSDARG00000027867|ENSDARG00000077909|ENSDARG00000010556|ENSDARG00000033544|ENSDARG00000041982|ENSDARG00000035514	http://amigo.geneontology.org/amigo/term/GO:0004222	metallopeptidase activity	MF
transferase activity, transferring glycosyl groups	Gene Ontology	GO:0016757	32	225	0.0242073	0.212751	ENSDARG00000012355|ENSDARG00000014386|ENSDARG00000059391|ENSDARG00000018971|ENSDARG00000002021|ENSDARG00000093640|ENSDARG00000037852|ENSDARG00000099802|ENSDARG00000061520|ENSDARG00000032862|ENSDARG00000015449|ENSDARG00000057303|ENSDARG00000088515|ENSDARG00000012745|ENSDARG00000069934|ENSDARG00000044514|ENSDARG00000052376|ENSDARG00000097491|ENSDARG00000062278|ENSDARG00000104042|ENSDARG00000038489|…	http://amigo.geneontology.org/amigo/term/GO:0016757	glycosyltransferase activity	MF
ATPase-coupled intramembrane lipid transporter activity	Gene Ontology	GO:0140326	5	17	0.026722	0.228111	ENSDARG00000077492|ENSDARG00000115869|ENSDARG00000101094|ENSDARG00000008413|ENSDARG00000042285	http://amigo.geneontology.org/amigo/term/GO:0140326	microfilament motor activity	MF
mitogen-activated protein kinase binding	Gene Ontology	GO:0051019	5	17	0.026722	0.228111	ENSDARG00000019307|ENSDARG00000111612|ENSDARG00000094836|ENSDARG00000002552|ENSDARG00000009299	http://amigo.geneontology.org/amigo/term/GO:0051019	small GTPase binding	MF
ATPase-coupled transmembrane transporter activity	Gene Ontology	GO:0042626	9	44	0.0307207	0.242751	ENSDARG00000096662|ENSDARG00000074635|ENSDARG00000021787|ENSDARG00000041107|ENSDARG00000061233|ENSDARG00000056200|ENSDARG00000011573|ENSDARG00000077007|ENSDARG00000061591	http://amigo.geneontology.org/amigo/term/GO:0042626	L-amino acid transmembrane transporter activity	MF
bicarbonate transmembrane transporter activity	Gene Ontology	GO:0015106	4	12	0.030975	0.242751	ENSDARG00000007371|ENSDARG00000029832|ENSDARG00000041107|ENSDARG00000055835	http://amigo.geneontology.org/amigo/term/GO:0015106	L-amino acid transmembrane transporter activity	MF
metal ion transmembrane transporter activity	Gene Ontology	GO:0046873	4	12	0.030975	0.242751	ENSDARG00000005823|ENSDARG00000101434|ENSDARG00000079525|ENSDARG00000059361	http://amigo.geneontology.org/amigo/term/GO:0046873	ligand-gated calcium channel activity	MF
MAP kinase kinase kinase activity	Gene Ontology	GO:0004709	4	12	0.030975	0.242751	ENSDARG00000104760|ENSDARG00000079473|ENSDARG00000061710|ENSDARG00000005416	http://amigo.geneontology.org/amigo/term/GO:0004709	protein tyrosine kinase activity	MF
NADPH-hemoprotein reductase activity	Gene Ontology	GO:0003958	3	7	0.0318494	0.242751	ENSDARG00000031976|ENSDARG00000055092|ENSDARG00000026925	http://amigo.geneontology.org/amigo/term/GO:0003958	superoxide-generating NAD(P)H oxidase activity	MF
6-phosphofructo-2-kinase activity	Gene Ontology	GO:0003873	3	7	0.0318494	0.242751	ENSDARG00000001953|ENSDARG00000055540|ENSDARG00000029075	http://amigo.geneontology.org/amigo/term/GO:0003873	protein tyrosine kinase activity	MF
glucose:sodium symporter activity	Gene Ontology	GO:0005412	3	7	0.0318494	0.242751	ENSDARG00000077812|ENSDARG00000019932|ENSDARG00000013871	http://amigo.geneontology.org/amigo/term/GO:0005412	L-amino acid transmembrane transporter activity	MF
NAADP-sensitive calcium-release channel activity	Gene Ontology	GO:0072345	3	7	0.0318494	0.242751	ENSDARG00000002285|ENSDARG00000078363|ENSDARG00000100420	http://amigo.geneontology.org/amigo/term/GO:0072345	ligand-gated calcium channel activity	MF
calmodulin-dependent protein kinase activity	Gene Ontology	GO:0004683	6	25	0.0374244	0.274224	ENSDARG00000111612|ENSDARG00000060116|ENSDARG00000005372|ENSDARG00000018411|ENSDARG00000057000|ENSDARG00000002552	http://amigo.geneontology.org/amigo/term/GO:0004683	protein tyrosine kinase activity	MF
G protein-coupled receptor binding	Gene Ontology	GO:0001664	9	46	0.0388605	0.281784	ENSDARG00000099844|ENSDARG00000016676|ENSDARG00000021647|ENSDARG00000038378|ENSDARG00000035832|ENSDARG00000030644|ENSDARG00000016364|ENSDARG00000073948|ENSDARG00000078828	http://amigo.geneontology.org/amigo/term/GO:0001664	tumor necrosis factor receptor binding	MF
oxidoreductase activity, acting on paired donors, with incorporation or reduction of molecular oxygen, NAD(P)H as one donor, and incorporation of one atom of oxygen	Gene Ontology	GO:0016709	4	13	0.0396114	0.281784	ENSDARG00000031976|ENSDARG00000055092|ENSDARG00000026925|ENSDARG00000011809	http://amigo.geneontology.org/amigo/term/GO:0016709	oxidoreductase activity, acting on paired donors, with incorporation or reduction of molecular oxygen, NAD(P)H as one donor, and incorporation of one atom of oxygen	MF
sulfotransferase activity	Gene Ontology	GO:0008146	12	69	0.0410108	0.289328	ENSDARG00000028275|ENSDARG00000007769|ENSDARG00000061357|ENSDARG00000071495|ENSDARG00000035578|ENSDARG00000086826|ENSDARG00000079079|ENSDARG00000044341|ENSDARG00000073728|ENSDARG00000071501|ENSDARG00000041540|ENSDARG00000034375	http://amigo.geneontology.org/amigo/term/GO:0008146	sulfotransferase activity	MF
protein-membrane adaptor activity	Gene Ontology	GO:0043495	3	8	0.044325	0.302702	ENSDARG00000055656|ENSDARG00000040568|ENSDARG00000022261	http://amigo.geneontology.org/amigo/term/GO:0043495	protein-membrane adaptor activity	MF
cytoskeletal anchor activity	Gene Ontology	GO:0008093	3	8	0.044325	0.302702	ENSDARG00000045880|ENSDARG00000079934|ENSDARG00000078803	http://amigo.geneontology.org/amigo/term/GO:0008093	protein-membrane adaptor activity	MF
serine-type peptidase activity	Gene Ontology	GO:0008236	17	110	0.0450904	0.305486	ENSDARG00000014907|ENSDARG00000062707|ENSDARG00000061173|ENSDARG00000074185|ENSDARG00000096975|ENSDARG00000103117|ENSDARG00000004748|ENSDARG00000079393|ENSDARG00000056324|ENSDARG00000069833|ENSDARG00000044655|ENSDARG00000040513|ENSDARG00000079420|ENSDARG00000075265|ENSDARG00000053323|ENSDARG00000030967|ENSDARG00000100792	http://amigo.geneontology.org/amigo/term/GO:0008236	metallopeptidase activity	MF
lipid phosphatase activity	Gene Ontology	GO:0042577	5	20	0.0476346	0.314	ENSDARG00000060534|ENSDARG00000057209|ENSDARG00000079790|ENSDARG00000079671|ENSDARG00000040255	http://amigo.geneontology.org/amigo/term/GO:0042577	lipid phosphatase activity	MF
AMP binding	Gene Ontology	GO:0016208	4	14	0.0494826	0.315228	ENSDARG00000012801|ENSDARG00000044142|ENSDARG00000001933|ENSDARG00000060504	http://amigo.geneontology.org/amigo/term/GO:0016208	AMP binding	MF
water transmembrane transporter activity	Gene Ontology	GO:0005372	4	14	0.0494826	0.315228	ENSDARG00000053480|ENSDARG00000003808|ENSDARG00000045141|ENSDARG00000071592	http://amigo.geneontology.org/amigo/term/GO:0005372	ligand-gated calcium channel activity	MF
