# Supplementary material for: Transcriptome Analysis Reveals the Molecular Basis of Overfeeding-Induced Diabetes in Zebrafish
Source: Int J Mol Sci. 2023 Jul 26;24(15):11994. doi: 10.3390/ijms241511994 (PMC10418320; doi:10.3390/ijms241511994)
Supplement: Supplementary file 1 [file ijms-24-11994-s001.zip › Supplementary Table S5_ The genes of insulin receptors and insulin receptor subunits.xlsx]

## Sheet: Sheet1
	ENSEMBL Gene ID	FoldChange	pvalue	padj	Gene name	Gene description
Up-regulated	ENSDARG00000054087	1.33158	0.511358	0.793949	irs1	insulin receptor substrate 1 [Source:ZFIN;Acc:ZDB-GENE-030131-872]
Up-regulated	ENSDARG00000011948	1.21334	0.380916	0.683985	insra	insulin receptor a [Source:ZFIN;Acc:ZDB-GENE-020503-3]
Down-regulated	ENSDARG00000037099	1.05221	0.909396	1	irs2a	insulin receptor substrate 2a [Source:ZFIN;Acc:ZDB-GENE-040426-975]
Down-regulated	ENSDARG00000075282	1.29245	0.526477	0.799855	irs2b	insulin receptor substrate 2b [Source:ZFIN;Acc:ZDB-GENE-081104-462]
Down-regulated	ENSDARG00000086551	1.09097	0.708238	0.898558	irs4a	insulin receptor substrate 4a [Source:ZFIN;Acc:ZDB-GENE-120215-92]
Down-regulated	ENSDARG00000071524	1.24098	0.15482	0.420758	insrb	insulin receptor b [Source:ZFIN;Acc:ZDB-GENE-020503-4]
